# Supplementary material
Source: publisher figshare collection journal article supplement (https://gsajournals.figshare.com/ndownloader/files/14464709)
Supplement: Supplementary file 1 [file 14464709]

## Sheet: Table S1
Table S1. Target table used in EdgeR describing all samples and categories used for cross comparisons. Note: "cross_spe" refers to individual crosses as given in material and methods, while "cross_ID" refers to the 6 reciprocal crosses (AA, CC, PP, AC, AP, CP) meaning that each term encompasses two individual crosses
Sample	Replicate	Cross_type	Mother	Father	Barrier category	Cross_direction	cross_spe	cross_ID
A1	rep1	intra	LA4329B	LA2748B	no_barrier	LA4329BxLA2748B	CC1	CC
A2	rep1	intra	LA2185A	LA1626B	no_barrier	LA2185AxLA1626B	AA1	AA
A3	rep1	intra	LA2744B	LA2964A	no_barrier	LA2744BxLA2964A	PP1	PP
A4	rep1	hybrid	LA4329B	LA2185A	weak	LA4329BxLA2185A	CA	AC
A5	rep1	hybrid	LA4329B	LA2744B	strong	LA4329BxLA2744B	CP	CP
A6	rep1	hybrid	LA2185A	LA4329B	weak	LA2185AxLA4329B	AC	AC
A7	rep1	hybrid	LA2185A	LA2744B	strong	LA2185AxLA2744B	AP	AP
A8	rep1	hybrid	LA2744B	LA2185A	strong	LA2744BxLA2185A	PA	AP
A9	rep1	hybrid	LA2744B	LA4329B	strong	LA2744BxLA4329B	PC	CP
A10	rep1	intra	LA2748B	LA4329B	no_barrier	LA2748BxLA4329B	CC2	CC
A11	rep1	intra	LA2964A	LA2744B	no_barrier	LA2964AxLA2744B	PP2	PP
A12	rep1	intra	LA1626B	LA2185A	no_barrier	LA1626BxLA2185A	AA2	AA
A13	rep2	intra	LA4329B	LA2748B	no_barrier	LA4329BxLA2748B	CC1	CC
A14	rep2	intra	LA2185A	LA1626B	no_barrier	LA2185AxLA1626B	AA1	AA				T
A15	rep2	intra	LA2744B	LA2964A	no_barrier	LA2744BxLA2964A	PP1	PP
A16	rep2	hybrid	LA4329B	LA2185A	weak	LA4329BxLA2185A	CA	AC
A17	rep2	hybrid	LA4329B	LA2744B	strong	LA4329BxLA2744B	CP	CP
A18	rep2	hybrid	LA2185A	LA4329B	weak	LA2185AxLA4329B	AC	AC
A19	rep2	hybrid	LA2185A	LA2744B	strong	LA2185AxLA2744B	AP	AP
A20	rep2	hybrid	LA2744B	LA2185A	strong	LA2744BxLA2185A	PA	AP
A21	rep2	hybrid	LA2744B	LA4329B	strong	LA2744BxLA4329B	PC	CP
A22	rep2	intra	LA2748B	LA4329B	no_barrier	LA2748BxLA4329B	CC2	CC
A23	rep2	intra	LA2964A	LA2744B	no_barrier	LA2964AxLA2744B	PP2	PP
A24	rep2	intra	LA1626B	LA2185A	no_barrier	LA1626BxLA2185A	AA2	AA
A25	rep3	intra	LA4329B	LA2748B	no_barrier	LA4329BxLA2748B	CC1	CC
A26	rep3	intra	LA2185A	LA1626B	no_barrier	LA2185AxLA1626B	AA1	AA
A27	rep3	intra	LA2744B	LA2964A	no_barrier	LA2744BxLA2964A	PP1	PP
A28	rep3	hybrid	LA4329B	LA2185A	weak	LA4329BxLA2185A	CA	AC
A29	rep3	hybrid	LA4329B	LA2744B	strong	LA4329BxLA2744B	CP	CP
A30	rep3	hybrid	LA2185A	LA4329B	weak	LA2185AxLA4329B	AC	AC
A31	rep3	hybrid	LA2185A	LA2744B	strong	LA2185AxLA2744B	AP	AP
A32	rep3	hybrid	LA2744B	LA2185A	strong	LA2744BxLA2185A	PA	AP
A33	rep3	hybrid	LA2744B	LA4329B	strong	LA2744BxLA4329B	PC	CP
A34	rep3	intra	LA2748B	LA4329B	no_barrier	LA2748BxLA4329B	CC2	CC
A35	rep3	intra	LA2964A	LA2744B	no_barrier	LA2964AxLA2744B	PP2	PP
A36	rep3	intra	LA1626B	LA2185A	no_barrier	LA1626BxLA2185A	AA2	AA

## Sheet: Table S2
Table S2. Specific contrasts used in EdgeR for each differential gene expression analysis. The symbol "∩" indicates that the result includes the intersection of differentially expressed genes in all listed contrasts
Contrast	Crosses included in first term	Crosses included in second term	Contrast used in EdgeR
AP-PA	AP	PA	cross_speAP-cross_spePA
CP-PC	CP	PC	cross_speCP-cross_spePC
AC-CA	AC	CA	cross_speAC-cross_speCA
PP1-PP2	PP1	PP2	cross_spePP1-cross_spePP2
CC1-CC2	CC1	CC2	cross_speCC1-cross_speCC2
AA1-AA2	AA1	AA2	cross_speAA1-cross_speAA2
PP-AA	PP1, PP2	AA1, AA2	cross_IDPP-cross_IDAA
PP-CC	PP1, PP2	CC1, CC2	cross_IDPP-cross_IDCC
CC-AA	CC1, CC2	AA1, AA2	cross_IDCC-cross_IDAA
AP-intra	AP	PP1, PP2, AA1, AA2	cross_speAP-cross_spePP1 ∩ cross_speAP-cross_spePP2 ∩ cross_speAP-cross_speAA1 ∩ cross_speAP-cross_speAA2
PA-intra	PA	PP1, PP2, AA1, AA2	cross_spePA-cross_spePP1 ∩ cross_spePA-cross_spePP2 ∩ cross_spePA-cross_speAA1 ∩ cross_spePA-cross_speAA2
CP-intra	CP	PP1, PP2, CC1, CC2	cross_speCP-cross_spePP1 ∩ cross_speCP-cross_spePP2 ∩ cross_speCP-cross_speCC1 ∩ cross_speCP-cross_speCC2
PC-intra	PC	PP1, PP2, CC1, CC2	cross_spePC-cross_spePP1 ∩ cross_spePC-cross_spePP2 ∩ cross_spePC-cross_speCC1 ∩ cross_spePC-cross_speCC2
AC-intra	AC	CC1, CC2, AA1, AA2	cross_speAC-cross_speAA1 ∩ cross_speAC-cross_speAA2 ∩ cross_speAC-cross_speCC1 ∩ cross_speAC-cross_speCC2
CA-intra	CA	CC1, CC2, AA1, AA2	cross_speCA-cross_speAA1 ∩ cross_speCA-cross_speAA2 ∩ cross_speCA-cross_speAA1 ∩ cross_speCA-cross_speAA2
AP-CP	AP	CP	cross_speAP - cross_speCP
PA-PC	PA	PC	cross_spePA - cross_spePC

## Sheet: Table S3
Table S3. Differential gene expression results for 17 contrasts (cross comparisons). Expression changes are given as 'term1-term2'. A "-1" value means that the gene is downregulated in term1 (yellow cells); "1" values mean that the gene is upregulated in term1 (green cells); FDR = 0.05
Gene	AP-PA	CP-PC	AC-CA	PP1-PP2	CC1-CC2	AA1-AA2	PP-AA	PP-CC	CC-AA	AP-intra	PA-intra	CP-intra	PC-intra	AC-intra	CA-intra	AP-CP	PA-PC	ITAG2.4 annotation	Protein family	Molecular Function (GO)	Biological Process (GO)	Cellular Component (GO)	Protein Class	Pathway
# Total not DE genes	14779	14853	18709	19121	20639	20726	19359	20184	19225	21135	19815	21637	20330	21888	21757	19367	21218
# Total overexpressed genes	4005	3799	1784	1454	639	654	1471	971	1491	330	653	142	533	50	72	1296	546
# Total underexpressed genes	3222	3354	1513	1431	728	626	1176	851	1290	541	1538	227	1143	68	177	1343	242
Solyc00g005050.2	0	0	0	0	0	0	0	0	0	0	0	0	0	0	0	0	0	Arabinogalactan protein (AHRD V1 ***- B6SST2_MAIZE)	FAMILY NOT NAMED	none	none	none	none	none
Solyc00g005840.2	0	0	0	0	0	0	0	0	0	0	0	0	0	0	0	0	0	Thioredoxin family protein (AHRD V1 ***- D7MCJ1_ARALY)%3B contains Interpro domain(s) IPR015467 Thioredoxin%2C core	FAMILY NOT NAMED	catalytic activityHHGO:0003824;oxidoreductase activityHHGO:0016491	regulation of biological processHHGO:0050789;response to stimulusHHGO:0050896;response to stressHHGO:0006950;sulfur compound metabolic processHHGO:0006790;protein foldingHHGO:0006457;biological regulationHHGO:0065007;homeostatic processHHGO:0042592;protein metabolic processHHGO:0019538;cellular processHHGO:0009987;primary metabolic processHHGO:0044238;metabolic processHHGO:0008152	cytoplasmHHGO:0005737;cell partHHGO:0044464;intracellularHHGO:0005622	oxidoreductaseHHPC00176	Hypoxia response via HIF activationHHP00030 ThioredoxinHHP00825
Solyc00g005860.1	1	1	0	0	0	0	0	0	0	0	0	0	0	0	0	0	0	Unknown Protein (AHRD V1)	FAMILY NOT NAMED	none	none	none	none	none
Solyc00g005870.1	-1	-1	0	1	0	0	0	1	0	-1	0	0	0	0	0	-1	0	Mutator-like transposase (AHRD V1 *-*- Q94HK4_ORYSA)%3B contains Interpro domain(s) IPR006564 Zinc finger%2C PMZ-type ;_Length	FAMILY NOT NAMED	none	mitosisHHGO:0007067	none	none	none
Solyc00g005880.1	-1	0	0	1	0	0	0	0	0	0	0	0	0	0	0	0	0	Unknown Protein (AHRD V1)	#N/A	#N/A	#N/A	#N/A	#N/A	#N/A
Solyc00g006470.1	-1	-1	0	-1	1	0	0	1	-1	0	0	0	0	-1	-1	1	-1	Unknown Protein (AHRD V1)	FAMILY NOT NAMED	none	none	none	none	none
Solyc00g006490.2	0	0	0	0	0	0	0	0	0	0	0	0	0	0	0	0	0	Serine/threonine-protein phosphatase 6 regulatory subunit 3 (AHRD V1 **-- SAPS3_HUMAN)%3B contains Interpro domain(s) IPR007587 SIT4 phosphatase-associated protein	SIT4 YEAST -ASSOCIATING PROTEIN-RELATED	phosphatase regulator activityHHGO:0019208;protein bindingHHGO:0005515;bindingHHGO:0005488;enzyme regulator activityHHGO:0030234	none	none	phosphatase modulatorHHPC00184;enzyme modulatorHHPC00095	none
Solyc00g006540.1	0	0	0	0	0	0	-1	0	-1	0	0	0	0	0	0	0	0	Unknown Protein (AHRD V1)	#N/A	#N/A	#N/A	#N/A	#N/A	#N/A
Solyc00g006570.1	0	0	0	0	0	0	0	-1	1	0	0	0	0	0	0	0	0	Unknown Protein (AHRD V1)	#N/A	#N/A	#N/A	#N/A	#N/A	#N/A
Solyc00g006590.1	1	1	0	-1	0	0	0	0	0	0	0	0	-1	0	0	0	0	Unknown Protein (AHRD V1)	#N/A	#N/A	#N/A	#N/A	#N/A	#N/A
Solyc00g006680.1	-1	-1	1	0	0	0	0	1	0	0	0	0	0	0	0	0	0	Plant senescence-associated protein (Fragment) (AHRD V1 *-*- D7PDP5_9HYPO)	#N/A	#N/A	#N/A	#N/A	#N/A	#N/A
Solyc00g006690.2	1	0	1	1	0	0	1	1	-1	0	-1	0	0	0	-1	0	-1	Unknown Protein (AHRD V1)	FAMILY NOT NAMED	none	none	none	none	none
Solyc00g006800.2	0	0	0	0	0	0	0	0	0	0	0	0	0	0	0	0	0	Transaldolase (AHRD V1 ***- Q9FVH1_SOLLC)%3B contains Interpro domain(s) IPR014634 Transaldolase%2C bacterial/plant type	TRANSALDOLASE	none	none	none	none	none
Solyc00g006810.2	0	0	0	0	0	0	0	0	0	0	0	0	0	0	0	0	0	Peptidyl-prolyl cis-trans isomerase (AHRD V1 *-*- Q8DJW8_THEEB)%3B contains Interpro domain(s) IPR001179 Peptidyl-prolyl cis-trans isomerase%2C FKBP-type	PEPTIDYL-PROLYL CIS-TRANS ISOMERASE	isomerase activityHHGO:0016853;bindingHHGO:0005488;catalytic activityHHGO:0003824	cellular processHHGO:0009987;protein metabolic processHHGO:0019538;protein foldingHHGO:0006457;primary metabolic processHHGO:0044238;cellular protein modification processHHGO:0006464;metabolic processHHGO:0008152	cytoplasmHHGO:0005737;cell partHHGO:0044464;intracellularHHGO:0005622	isomeraseHHPC00135;calcium-binding proteinHHPC00060;chaperoneHHPC00072	none
Solyc00g006820.2	-1	-1	0	0	0	0	0	0	0	0	1	0	1	0	0	0	0	Peptide transporter-like protein (AHRD V1 **-* Q9LYR6_ARATH)%3B contains Interpro domain(s) IPR000109 TGF-beta receptor%2C type I/II extracellular region	OLIGOPEPTIDE TRANSPORTER-RELATED	transmembrane transporter activityHHGO:0022857;transporter activityHHGO:0005215	transportHHGO:0006810	none	transporterHHPC00227	none
Solyc00g006830.2	0	1	0	0	0	0	0	0	0	0	0	0	0	0	0	0	0	No exine formation-1 (AHRD V1 **-- Q9LYR7_ARATH)	FAMILY NOT NAMED	none	none	none	none	none
Solyc00g007000.1	0	0	0	0	0	0	0	0	0	0	0	0	0	0	0	0	0	Unknown Protein (AHRD V1)	#N/A	#N/A	#N/A	#N/A	#N/A	#N/A
Solyc00g007010.2	0	0	0	0	0	0	0	0	0	0	0	0	0	0	0	0	0	Phosphatidylinositol phosphate (PtdInsP) phosphatase involved in hydrolysis of PtdIns (AHRD V1 **** D6VWZ1_YEAST)%3B contains Interpro domain(s) IPR002013 Synaptojanin%2C N-terminal	INOSITOL 5-PHOSPHATASE	none	lipid metabolic processHHGO:0006629;monosaccharide metabolic processHHGO:0005996;protein transportHHGO:0015031;endocytosisHHGO:0006897;transportHHGO:0006810;vesicle-mediated transportHHGO:0016192;intracellular protein transportHHGO:0006886;receptor-mediated endocytosisHHGO:0006898;cellular processHHGO:0009987;phospholipid metabolic processHHGO:0006644;carbohydrate metabolic processHHGO:0005975;ph…	none	phosphataseHHPC00181;hydrolaseHHPC00121	none
Solyc00g007030.1	0	0	0	1	0	0	-1	0	-1	0	0	0	-1	0	0	0	0	Glutathione S-transferase (AHRD V1 ***- Q76KW1_PEA)%3B contains Interpro domain(s) IPR004046 Glutathione S-transferase%2C C-terminal	GLUTATHIONE S-TRANSFERASE, GST, SUPERFAMILY, GST DOMAIN CONTAINING	transferase activityHHGO:0016740;catalytic activityHHGO:0003824	cellular amino acid metabolic processHHGO:0006520;sulfur compound metabolic processHHGO:0006790;cellular processHHGO:0009987;nitrogen compound metabolic processHHGO:0006807;metabolic processHHGO:0008152;primary metabolic processHHGO:0044238	cytoplasmHHGO:0005737;cell partHHGO:0044464;intracellularHHGO:0005622	reductaseHHPC00198;translation elongation factorHHPC00222;epimerase_racemaseHHPC00096;RNA binding proteinHHPC00031;oxidoreductaseHHPC00176;translation factorHHPC00223;signaling moleculeHHPC00207;cytoskeletal proteinHHPC00085;transferaseHHPC00220;isomeraseHHPC00135;nucleic acid bindingHHPC00171	none
Solyc00g007040.1	1	1	0	1	0	0	0	0	-1	0	-1	0	-1	0	0	0	0	Glutathione-S-transferase (AHRD V1 ***- B5M1W3_RHEAU)%3B contains Interpro domain(s) IPR004045 Glutathione S-transferase%2C N-terminal	GLUTATHIONE S-TRANSFERASE, GST, SUPERFAMILY, GST DOMAIN CONTAINING	transferase activityHHGO:0016740;catalytic activityHHGO:0003824	cellular amino acid metabolic processHHGO:0006520;sulfur compound metabolic processHHGO:0006790;cellular processHHGO:0009987;nitrogen compound metabolic processHHGO:0006807;metabolic processHHGO:0008152;primary metabolic processHHGO:0044238	cytoplasmHHGO:0005737;cell partHHGO:0044464;intracellularHHGO:0005622	reductaseHHPC00198;translation elongation factorHHPC00222;epimerase_racemaseHHPC00096;RNA binding proteinHHPC00031;oxidoreductaseHHPC00176;translation factorHHPC00223;signaling moleculeHHPC00207;cytoskeletal proteinHHPC00085;transferaseHHPC00220;isomeraseHHPC00135;nucleic acid bindingHHPC00171	none
Solyc00g007060.2	-1	-1	0	0	0	0	0	0	0	0	1	0	1	0	0	0	0	Serine/threonine kinase-like protein ABC1063 (AHRD V1 **** Q1KMP8_HORVD)%3B contains Interpro domain(s) IPR002290 Serine/threonine protein kinase	FAMILY NOT NAMED	none	none	none	none	none
Solyc00g007070.2	0	0	0	0	0	0	0	0	0	0	0	0	0	0	0	0	0	Heterogeneous nuclear ribonucleoprotein H1 (AHRD V1 **-- Q8C2Q7_MOUSE)%3B contains Interpro domain(s) IPR012677 Nucleotide-binding%2C alpha-beta plait	HETEROGENEOUS NUCLEAR RIBONUCLEOPROTEIN-RELATED	structural constituent of ribosomeHHGO:0003735;nucleic acid bindingHHGO:0003676;structural molecule activityHHGO:0005198;bindingHHGO:0005488	mRNA processingHHGO:0006397;nucleobase-containing compound metabolic processHHGO:0006139;RNA metabolic processHHGO:0016070;primary metabolic processHHGO:0044238;metabolic processHHGO:0008152;mRNA splicing, via spliceosomeHHGO:0000398	none	ribosomal proteinHHPC00202;RNA binding proteinHHPC00031;nucleic acid bindingHHPC00171	none
Solyc00g007080.2	0	0	0	0	0	0	0	0	0	0	0	0	0	0	0	0	0	Unknown Protein (AHRD V1)%3B contains Interpro domain(s) IPR007514 CHD5-like protein	30S_40S RIBOSOMAL PROTEIN S3	structural constituent of ribosomeHHGO:0003735;structural molecule activityHHGO:0005198	none	none	ribosomal proteinHHPC00202;RNA binding proteinHHPC00031;nucleic acid bindingHHPC00171	none
Solyc00g007090.2	-1	-1	0	0	0	0	0	0	0	0	0	0	0	0	0	0	0	Multi-pass transmembrane protein (AHRD V1 *--- Q5CMR0_CRYHO)%3B contains Interpro domain(s) IPR019328 GPI-GlcNAc transferase complex%2C PIG-H component	PHOSPHATIDYLINOSITOL GLYCAN, CLASS H	none	none	none	none	none
Solyc00g007100.2	0	0	0	0	0	0	0	0	0	0	0	0	0	0	0	0	0	Serine/threonine protein kinase (AHRD V1 **** Q2U105_ASPOR)%3B contains Interpro domain(s) IPR002290 Serine/threonine protein kinase	MITOGEN-ACTIVATED PROTEIN KINASE	transferase activityHHGO:0016740;catalytic activityHHGO:0003824;kinase activityHHGO:0016301;protein kinase activityHHGO:0004672	response to stimulusHHGO:0050896;signal transductionHHGO:0007165;response to stressHHGO:0006950;cell cycleHHGO:0007049;mitosisHHGO:0007067;MAPK cascadeHHGO:0000165;cell communicationHHGO:0007154;protein phosphorylationHHGO:0006468;intracellular signal transductionHHGO:0035556;cellular processHHGO:0009987;protein metabolic processHHGO:0019538;cellular component movementHHGO:0006928;cellular protei…	none	non-receptor serine_threonine protein kinaseHHPC00167;protein kinaseHHPC00193;transferaseHHPC00220;kinaseHHPC00137	none
Solyc00g007110.2	0	0	0	0	0	0	0	0	0	0	0	0	0	0	0	0	0	Epidermal growth factor receptor substrate 15 (AHRD V1 *--- EPS15_HUMAN)%3B contains Interpro domain(s) IPR011992 EF-Hand type	EH DOMAIN	calcium ion bindingHHGO:0005509;protein bindingHHGO:0005515;small GTPase regulator activityHHGO:0005083;bindingHHGO:0005488;enzyme regulator activityHHGO:0030234	intracellular protein transportHHGO:0006886;vesicle-mediated transportHHGO:0016192;cellular processHHGO:0009987;protein transportHHGO:0015031;endocytosisHHGO:0006897;transportHHGO:0006810	none	G-protein modulatorHHPC00022;calcium-binding proteinHHPC00060;membrane traffic proteinHHPC00150;enzyme modulatorHHPC00095	none
Solyc00g007120.2	0	0	0	0	0	0	0	0	0	0	0	0	0	0	0	0	0	Calcium-binding EF hand family protein (AHRD V1 ***- D7KK32_ARALY)%3B contains Interpro domain(s) IPR011992 EF-Hand type	EH DOMAIN	calcium ion bindingHHGO:0005509;protein bindingHHGO:0005515;small GTPase regulator activityHHGO:0005083;bindingHHGO:0005488;enzyme regulator activityHHGO:0030234	intracellular protein transportHHGO:0006886;vesicle-mediated transportHHGO:0016192;cellular processHHGO:0009987;protein transportHHGO:0015031;endocytosisHHGO:0006897;transportHHGO:0006810	none	G-protein modulatorHHPC00022;calcium-binding proteinHHPC00060;membrane traffic proteinHHPC00150;enzyme modulatorHHPC00095	none
Solyc00g007150.2	0	0	0	0	0	0	0	0	0	0	0	0	0	0	0	0	0	Unknown Protein (AHRD V1)	#N/A	#N/A	#N/A	#N/A	#N/A	#N/A
Solyc00g007180.1	1	1	0	-1	0	0	1	1	1	1	0	0	-1	0	0	1	0	Gibberellin 3-beta-hydroxylase (Fragment) (AHRD V1 ***- D9ZZX1_TRIIC)%3B contains Interpro domain(s) IPR005123 Oxoglutarate and iron-dependent oxygenase ;_Length	OXIDOREDUCTASE, 2OG-FE II OXYGENASE FAMILY PROTEIN	oxidoreductase activityHHGO:0016491;catalytic activityHHGO:0003824	regulation of biological processHHGO:0050789;lipid metabolic processHHGO:0006629;response to stimulusHHGO:0050896;response to endogenous stimulusHHGO:0009719;signal transductionHHGO:0007165;biological regulationHHGO:0065007;cell communicationHHGO:0007154;response to abiotic stimulusHHGO:0009628;biosynthetic processHHGO:0009058;cellular processHHGO:0009987;metabolic processHHGO:0008152;primary met…	none	none	none
Solyc00g007190.2	0	0	0	0	0	0	0	0	0	0	0	0	0	0	0	0	0	Serine/threonine phosphatase family protein (AHRD V1 **** C1E0J1_9CHLO)%3B contains Interpro domain(s) IPR015655 Protein phosphatase 2C	PROTEIN PHOSPHATASE 2C	kinase inhibitor activityHHGO:0019210;hydrolase activity, acting on ester bondsHHGO:0016788;phosphatase activityHHGO:0016791;bindingHHGO:0005488;catalytic activityHHGO:0003824;hydrolase activityHHGO:0016787;protein bindingHHGO:0005515;enzyme inhibitor activityHHGO:0004857;kinase regulator activityHHGO:0019207;phosphoprotein phosphatase activityHHGO:0004721;enzyme regulator activityHHGO:0030234	protein phosphorylationHHGO:0006468;cellular processHHGO:0009987;protein metabolic processHHGO:0019538;cellular protein modification processHHGO:0006464;metabolic processHHGO:0008152;primary metabolic processHHGO:0044238	none	kinase modulatorHHPC00140;kinase inhibitorHHPC00139;protein phosphataseHHPC00195;enzyme modulatorHHPC00095;phosphataseHHPC00181;hydrolaseHHPC00121	none
Solyc00g007200.2	1	1	0	-1	0	0	0	0	0	0	0	0	0	0	0	0	0	MLO-like protein 3 (AHRD V1 ***- C6EWE6_VITVI)%3B contains Interpro domain(s) IPR004326 Mlo-related protein	FAMILY NOT NAMED	none	response to stimulusHHGO:0050896;response to stressHHGO:0006950	cell partHHGO:0044464;membraneHHGO:0016020;plasma membraneHHGO:0005886	none	none
Solyc00g007220.2	0	-1	0	-1	0	0	0	1	-1	0	0	0	0	0	0	1	0	Ring finger protein (AHRD V1 ***- O49869_HORVU)%3B contains Interpro domain(s) IPR018957 Zinc finger%2C C3HC4 RING-type	RING FINGER DOMAIN-CONTAINING	none	catabolic processHHGO:0009056;cellular processHHGO:0009987;protein metabolic processHHGO:0019538;primary metabolic processHHGO:0044238;metabolic processHHGO:0008152;proteolysisHHGO:0006508;cellular protein modification processHHGO:0006464	none	none	none
Solyc00g007260.2	0	0	0	0	0	0	0	0	0	0	0	0	0	0	0	0	0	Sentrin-specific protease 7 (AHRD V1 *-*- SENP7_HUMAN)%3B contains Interpro domain(s) IPR003653 Peptidase C48%2C SUMO/Sentrin/Ubl1	SENTRIN_SUMO-SPECIFIC PROTEASE	hydrolase activityHHGO:0016787;cysteine-type peptidase activityHHGO:0008234;peptidase activityHHGO:0008233;catalytic activityHHGO:0003824	cellular processHHGO:0009987;protein metabolic processHHGO:0019538;primary metabolic processHHGO:0044238;cellular protein modification processHHGO:0006464;metabolic processHHGO:0008152	cell partHHGO:0044464;organelleHHGO:0043226;nucleusHHGO:0005634;intracellularHHGO:0005622	proteaseHHPC00190;hydrolaseHHPC00121	none
Solyc00g007270.2	0	0	0	0	0	0	0	0	0	0	0	0	0	0	0	0	0	Translation initiation factor (AHRD V1 ***- A6ZWQ9_YEAS7)%3B contains Interpro domain(s) IPR002769 Translation initiation factor IF6	EUKARYOTIC TRANSLATION INITIATION FACTOR 6	translation regulator activityHHGO:0045182;nucleic acid bindingHHGO:0003676;translation factor activity, nucleic acid bindingHHGO:0008135;translation initiation factor activityHHGO:0003743;bindingHHGO:0005488	protein metabolic processHHGO:0019538;translationHHGO:0006412;primary metabolic processHHGO:0044238;metabolic processHHGO:0008152	none	translation initiation factorHHPC00224;translation factorHHPC00223;RNA binding proteinHHPC00031;nucleic acid bindingHHPC00171	none
Solyc00g007300.2	1	1	0	0	0	0	0	0	0	0	0	0	0	0	0	0	0	Lrr%2C resistance protein fragment	LEUCINE-RICH REPEAT-CONTAINING PROTEIN	none	none	none	none	none
Solyc00g007320.1	1	1	1	-1	-1	0	1	1	1	1	0	0	0	0	0	1	0	Unknown Protein (AHRD V1)	FAMILY NOT NAMED	none	none	none	none	none
Solyc00g007550.1	0	0	0	0	0	0	0	0	0	0	0	0	0	0	0	0	0	Unknown Protein (AHRD V1)	#N/A	#N/A	#N/A	#N/A	#N/A	#N/A
Solyc00g007560.1	0	1	0	0	0	0	-1	0	-1	0	0	0	0	0	0	0	0	Serine/threonine-protein phosphatase 7 long form homolog (AHRD V1 *--- PPP7L_ARATH)%3B contains Interpro domain(s) IPR019557 Aminotransferase-like%2C plant mobile domain	FAMILY NOT NAMED	none	mitosisHHGO:0007067	none	none	none
Solyc00g007600.1	1	0	0	0	0	0	-1	0	-1	0	0	0	0	0	0	1	0	Meiotic recombination protein DMC1 (AHRD V1 *-*- B4FMC1_MAIZE)	#N/A	#N/A	#N/A	#N/A	#N/A	#N/A
Solyc00g008270.1	0	-1	0	-1	0	0	0	1	-1	0	0	0	0	0	-1	1	0	Unknown Protein (AHRD V1)	#N/A	#N/A	#N/A	#N/A	#N/A	#N/A
Solyc00g008570.2	0	0	-1	0	-1	0	0	0	0	0	1	0	0	0	1	0	0	Unknown Protein (AHRD V1)	#N/A	#N/A	#N/A	#N/A	#N/A	#N/A
Solyc00g008580.1	0	0	1	1	0	0	0	1	-1	0	0	0	0	0	-1	0	0	Unknown Protein (AHRD V1)	FAMILY NOT NAMED	none	none	none	none	none
Solyc00g008680.2	-1	-1	0	0	0	0	0	0	0	0	0	0	0	0	0	0	0	Calcium binding protein-like (AHRD V1 *--- Q656S9_ORYSJ)%3B contains Interpro domain(s) IPR011992 EF-Hand type	RETICULOCALBIN	none	none	none	none	Gonadotropin-releasing hormone receptor pathwayHHP06664 AMPKHHP06830
Solyc00g009020.2	0	0	0	0	0	0	0	0	0	0	0	0	0	0	0	0	0	Mitochondrial ATP synthase (AHRD V1 ***- B6TLY8_MAIZE)	FAMILY NOT NAMED	none	none	none	none	none
Solyc00g009040.2	1	1	0	-1	0	0	0	0	0	0	-1	0	-1	0	0	0	0	Polyadenylate-binding protein 2 (AHRD V1 **** B6U4M0_MAIZE)%3B contains Interpro domain(s) IPR006515 Polyadenylate binding protein%2C human types 1%2C 2%2C 3%2C 4	RNA BINDING PROTEIN	none	none	none	none	none
Solyc00g009050.1	0	0	0	0	0	0	0	0	0	0	0	0	0	0	0	0	0	UPF0544 protein C5orf45 (AHRD V1 ***- CE045_HUMAN)	FAMILY NOT NAMED	none	none	none	none	none
Solyc00g009060.2	1	1	0	-1	0	0	0	0	0	0	-1	0	-1	0	0	0	0	Hypoxanthine phosphoribosyltransferase (AHRD V1 ***- B4UWA8_ARAHY)%3B contains Interpro domain(s) IPR005904 Hypoxanthine phosphoribosyl transferase	FAMILY NOT NAMED	transferase activityHHGO:0016740;transferase activity, transferring glycosyl groupsHHGO:0016757;bindingHHGO:0005488;catalytic activityHHGO:0003824	purine nucleobase metabolic processHHGO:0006144;biosynthetic processHHGO:0009058;cellular processHHGO:0009987;nucleobase-containing compound metabolic processHHGO:0006139;nitrogen compound metabolic processHHGO:0006807;metabolic processHHGO:0008152;phosphate-containing compound metabolic processHHGO:0006796;primary metabolic processHHGO:0044238	cytoplasmHHGO:0005737;cell partHHGO:0044464;cytosolHHGO:0005829;intracellularHHGO:0005622	mutaseHHPC00160;glycosyltransferaseHHPC00111;transferaseHHPC00220;isomeraseHHPC00135	Adenine and hypoxanthine salvage pathwayHHP02723 Hypoxanthine phosphoribosyl transferaseHHP02804;Xanthine and guanine salvage pathwayHHP02788 Guanine phosphoribosyl transferaseHHP03245;Xanthine and guanine salvage pathwayHHP02788 Xanthine phosphoribosyl transferaseHHP03247
Solyc00g009080.2	0	0	0	0	0	0	0	0	0	0	0	0	0	0	0	0	0	Unknown Protein (AHRD V1)	#N/A	#N/A	#N/A	#N/A	#N/A	#N/A
Solyc00g009090.2	0	0	0	0	0	0	0	0	0	0	0	0	0	0	0	0	0	Receptor like kinase%2C RLK	FAMILY NOT NAMED	none	defense response to bacteriumHHGO:0042742	none	none	none
Solyc00g009100.2	0	0	0	0	0	0	0	0	0	0	0	0	0	0	0	0	0	30S ribosomal protein S1-like (AHRD V1 ***- Q5ZC75_ORYSJ)%3B contains Interpro domain(s) IPR003029 Ribosomal protein S1%2C RNA binding domain	FAMILY NOT NAMED	none	none	none	none	none
Solyc00g009110.2	-1	0	0	0	0	0	0	0	0	0	0	0	0	0	0	0	0	Inositol-1 4 5-trisphosphate 5-Phosphatase-like protein (AHRD V1 *-*- Q9M1W5_ARATH)%3B contains Interpro domain(s) IPR000300 Inositol polyphosphate related phosphatase	INOSITOL 5-PHOSPHATASE	none	lipid metabolic processHHGO:0006629;monosaccharide metabolic processHHGO:0005996;signal transductionHHGO:0007165;transportHHGO:0006810;endocytosisHHGO:0006897;vesicle-mediated transportHHGO:0016192;cell communicationHHGO:0007154;cellular processHHGO:0009987;phospholipid metabolic processHHGO:0006644;phosphate-containing compound metabolic processHHGO:0006796;primary metabolic processHHGO:0044238;…	none	phosphataseHHPC00181;hydrolaseHHPC00121	none
Solyc00g009120.2	0	0	0	0	0	0	-1	-1	0	0	0	0	0	0	0	0	0	Short-chain dehydrogenase/reductase family protein (AHRD V1 ***- D7LXC9_ARALY)%3B contains Interpro domain(s) IPR002198 Short-chain dehydrogenase/reductase SDR	FAMILY NOT NAMED	oxidoreductase activityHHGO:0016491;catalytic activityHHGO:0003824	metabolic processHHGO:0008152	none	dehydrogenaseHHPC00092;reductaseHHPC00198;oxidoreductaseHHPC00176	none
Solyc00g009130.2	0	1	0	0	0	0	0	0	0	0	0	0	0	0	0	0	0	Dehydrogenase/reductase SDR family member 12 (AHRD V1 ***- C0HAG0_SALSA)%3B contains Interpro domain(s) IPR002198 Short-chain dehydrogenase/reductase SDR	FAMILY NOT NAMED	oxidoreductase activityHHGO:0016491;catalytic activityHHGO:0003824	metabolic processHHGO:0008152	none	dehydrogenaseHHPC00092;reductaseHHPC00198;oxidoreductaseHHPC00176	none
Solyc00g009140.2	1	1	0	0	0	0	0	0	0	0	0	0	0	0	0	0	0	Short-chain dehydrogenase/reductase SDR (AHRD V1 ***- A4A816_9GAMM)%3B contains Interpro domain(s) IPR002198 Short-chain dehydrogenase/reductase SDR	FAMILY NOT NAMED	oxidoreductase activityHHGO:0016491;catalytic activityHHGO:0003824	metabolic processHHGO:0008152	none	dehydrogenaseHHPC00092;reductaseHHPC00198;oxidoreductaseHHPC00176	none
Solyc00g009540.1	0	1	0	0	0	0	0	0	0	0	0	0	0	0	0	0	1	Helicase-like protein (AHRD V1 ***- Q5NAA4_ORYSJ)%3B contains Interpro domain(s) IPR010285 Protein of unknown function DUF889%2C eukaryote	UNCHARACTERIZED	none	none	none	none	none
Solyc00g009650.1	0	-1	1	-1	0	0	0	1	-1	0	0	0	0	0	-1	1	0	Unknown Protein (AHRD V1)	#N/A	#N/A	#N/A	#N/A	#N/A	#N/A
Solyc00g009760.2	0	-1	1	-1	0	-1	0	1	-1	0	0	0	0	0	-1	0	0	Cytochrome P450 monooxygenase (Fragment) (AHRD V1 *-*- Q6T4Q1_PYRCO)	FAMILY NOT NAMED	none	none	none	none	none
Solyc00g009780.1	1	-1	0	-1	1	0	-1	1	-1	0	0	0	0	0	0	1	-1	Unknown Protein (AHRD V1)	#N/A	#N/A	#N/A	#N/A	#N/A	#N/A
Solyc00g009800.1	0	-1	0	-1	1	0	0	1	-1	0	0	0	0	0	0	1	0	Unknown Protein (AHRD V1)	#N/A	#N/A	#N/A	#N/A	#N/A	#N/A
Solyc00g010100.1	0	0	0	0	0	0	-1	-1	0	0	0	0	0	0	0	0	0	Unknown Protein (AHRD V1)	#N/A	#N/A	#N/A	#N/A	#N/A	#N/A
Solyc00g010410.1	0	-1	0	-1	0	0	-1	0	-1	0	0	0	0	0	0	1	0	Unknown Protein (AHRD V1)	#N/A	#N/A	#N/A	#N/A	#N/A	#N/A
Solyc00g010530.1	0	0	1	0	0	0	0	1	-1	0	0	0	0	0	-1	0	0	Unknown Protein (AHRD V1)	FAMILY NOT NAMED	none	none	none	none	none
Solyc00g010540.1	0	0	0	0	0	0	-1	0	-1	0	0	0	0	0	0	0	0	Pol polyprotein (AHRD V1 ***- POL_BAEVM)%3B contains Interpro domain(s) IPR000477 RNA-directed DNA polymerase (reverse transcriptase) ;_Length	#N/A	#N/A	#N/A	#N/A	#N/A	#N/A
Solyc00g010550.1	0	0	0	0	0	0	0	0	0	0	0	0	0	0	0	0	0	Unknown Protein (AHRD V1)	#N/A	#N/A	#N/A	#N/A	#N/A	#N/A
Solyc00g010750.1	1	0	0	0	0	0	-1	0	0	0	0	0	0	0	0	0	0	Guanylate binding protein 2 (AHRD V1 ***- B2XWS2_PIG)%3B contains Interpro domain(s) IPR015894 Guanylate-binding protein%2C N-terminal ;_Length	GUANYLATE BINDING PROTEIN	hydrolase activityHHGO:0016787;GTPase activityHHGO:0003924;protein bindingHHGO:0005515;bindingHHGO:0005488;catalytic activityHHGO:0003824	response to stimulusHHGO:0050896	protein complexHHGO:0043234	heterotrimeric G-proteinHHPC00117;G-proteinHHPC00020;enzyme modulatorHHPC00095	none
Solyc00g010770.1	0	-1	0	0	0	0	0	0	-1	0	0	0	0	0	0	1	0	Unknown Protein (AHRD V1)	#N/A	#N/A	#N/A	#N/A	#N/A	#N/A
Solyc00g011150.1	1	0	1	0	1	-1	0	1	-1	0	0	0	0	0	-1	0	-1	Unknown Protein (AHRD V1)	FAMILY NOT NAMED	none	none	none	none	none
Solyc00g011170.1	-1	-1	1	1	0	0	1	1	-1	0	0	0	0	1	-1	0	-1	Unknown Protein (AHRD V1)	FAMILY NOT NAMED	none	none	none	none	none
Solyc00g011660.1	-1	-1	-1	0	1	0	0	0	1	-1	-1	-1	-1	0	0	-1	0	B3 domain-containing protein At1g49475 (AHRD V1 *-*- Y1475_ARATH)%3B contains Interpro domain(s) IPR003340 Transcriptional factor B3 ;_Length	FAMILY NOT NAMED	none	none	none	none	none
Solyc00g011870.1	1	0	1	0	0	0	-1	0	-1	0	0	0	0	0	0	1	0	Phosphatase 1G (AHRD V1 ***- B5X3X4_SALSA)%3B contains Interpro domain(s) IPR015655 Protein phosphatase 2C ;_Length	PROTEIN PHOSPHATASE 2C	kinase inhibitor activityHHGO:0019210;hydrolase activity, acting on ester bondsHHGO:0016788;phosphatase activityHHGO:0016791;bindingHHGO:0005488;catalytic activityHHGO:0003824;hydrolase activityHHGO:0016787;protein bindingHHGO:0005515;enzyme inhibitor activityHHGO:0004857;kinase regulator activityHHGO:0019207;phosphoprotein phosphatase activityHHGO:0004721;enzyme regulator activityHHGO:0030234	protein phosphorylationHHGO:0006468;cellular processHHGO:0009987;protein metabolic processHHGO:0019538;cellular protein modification processHHGO:0006464;metabolic processHHGO:0008152;primary metabolic processHHGO:0044238	none	kinase modulatorHHPC00140;kinase inhibitorHHPC00139;protein phosphataseHHPC00195;enzyme modulatorHHPC00095;phosphataseHHPC00181;hydrolaseHHPC00121	none
Solyc00g011880.2	0	0	0	0	0	0	0	0	0	0	0	0	0	0	0	0	0	AIG2-like protein (AHRD V1 ***- B4FVZ7_MAIZE)%3B contains Interpro domain(s) IPR009288 AIG2-like	FAMILY NOT NAMED	none	none	none	none	none
Solyc00g011890.2	-1	-1	1	0	-1	0	0	0	0	0	1	0	1	0	0	1	0	Galactokinase like protein (AHRD V1 **** O23461_ARATH)%3B contains Interpro domain(s) IPR012369 Galactokinase%2C glycosyltransferase	MEVALONATE KINASE_GALACTOKINASE	carbohydrate kinase activityHHGO:0019200;transferase activityHHGO:0016740;catalytic activityHHGO:0003824;kinase activityHHGO:0016301	monosaccharide metabolic processHHGO:0005996;carbohydrate metabolic processHHGO:0005975;primary metabolic processHHGO:0044238;metabolic processHHGO:0008152	none	transferaseHHPC00220;kinaseHHPC00137;carbohydrate kinaseHHPC00065	Fructose galactose metabolismHHP02744 GalactokinaseHHP02960
Solyc00g012430.1	0	0	1	0	0	0	0	1	-1	0	0	0	0	0	0	0	0	Unknown Protein (AHRD V1)	FAMILY NOT NAMED	none	none	none	none	none
Solyc00g012440.1	-1	-1	1	1	0	0	1	1	-1	0	0	0	0	0	-1	0	0	TO54-2 (Fragment) (AHRD V1 ***- Q3LVL5_TAROF)	FAMILY NOT NAMED	none	none	none	none	none
Solyc00g012540.1	1	1	0	0	0	0	0	0	0	0	-1	0	-1	0	0	0	0	Zinc finger CCCH domain-containing protein 6 (AHRD V1 ***- C3H6_ARATH)	FAMILY NOT NAMED	none	none	none	none	none
Solyc00g012800.1	0	0	0	-1	0	0	0	1	-1	0	0	0	0	0	0	0	0	Unknown Protein (AHRD V1)	#N/A	#N/A	#N/A	#N/A	#N/A	#N/A
Solyc00g013100.1	0	0	0	0	0	0	0	0	0	0	0	0	0	0	0	0	0	Unknown Protein (AHRD V1)	#N/A	#N/A	#N/A	#N/A	#N/A	#N/A
Solyc00g013110.1	0	0	0	0	0	0	0	0	0	0	0	0	0	0	0	0	0	Unknown Protein (AHRD V1)	FAMILY NOT NAMED	none	none	none	none	none
Solyc00g013120.2	0	-1	0	0	0	0	0	0	0	0	0	0	0	0	0	0	0	Uncharacterized mitochondrial protein AtMg01330 (AHRD V1 *-*- M1330_ARATH)	#N/A	#N/A	#N/A	#N/A	#N/A	#N/A
Solyc00g013130.2	0	-1	1	0	0	0	0	0	0	0	0	0	0	0	0	0	0	NADH-quinone oxidoreductase subunit N (AHRD V1 ***- Q7CZK9_AGRT5)%3B contains Interpro domain(s) IPR001750 NADH:ubiquinone/plastoquinone oxidoreductase	NADH DEHYDROGENASE	oxidoreductase activityHHGO:0016491;catalytic activityHHGO:0003824	respiratory electron transport chainHHGO:0022904;oxidative phosphorylationHHGO:0006119;generation of precursor metabolites and energyHHGO:0006091	none	dehydrogenaseHHPC00092;reductaseHHPC00198;oxidoreductaseHHPC00176	none
Solyc00g013140.1	0	0	0	0	0	0	0	0	0	0	0	0	0	0	0	0	0	NADH dehydrogenase subunit 5 (Fragment) (AHRD V1 ***- A1XJP5_SIMCH)%3B contains Interpro domain(s) IPR003945 NADH-plastoquinone oxidoreductase%2C chain 5 ;_Length	FAMILY NOT NAMED	oxidoreductase activityHHGO:0016491;catalytic activityHHGO:0003824	respiratory electron transport chainHHGO:0022904;oxidative phosphorylationHHGO:0006119;generation of precursor metabolites and energyHHGO:0006091	none	dehydrogenaseHHPC00092;reductaseHHPC00198;oxidoreductaseHHPC00176	none
Solyc00g013160.1	0	0	1	0	0	0	0	0	0	0	0	0	0	0	0	1	0	Unknown Protein (AHRD V1)	#N/A	#N/A	#N/A	#N/A	#N/A	#N/A
Solyc00g013180.1	0	0	0	0	0	0	0	0	0	0	0	0	0	0	0	0	0	NADH-ubiquinone oxidoreductase chain 4 (AHRD V1 ***- Q5M9Z8_TOBAC)%3B contains Interpro domain(s) IPR001750 NADH:ubiquinone/plastoquinone oxidoreductase ;_Length	NADH DEHYDROGENASE	oxidoreductase activityHHGO:0016491;catalytic activityHHGO:0003824	respiratory electron transport chainHHGO:0022904;oxidative phosphorylationHHGO:0006119;generation of precursor metabolites and energyHHGO:0006091	none	dehydrogenaseHHPC00092;reductaseHHPC00198;oxidoreductaseHHPC00176	none
Solyc00g013190.1	0	-1	0	-1	0	0	0	1	-1	0	0	0	0	-1	-1	1	-1	Unknown Protein (AHRD V1)	#N/A	#N/A	#N/A	#N/A	#N/A	#N/A
Solyc00g013330.1	0	0	0	-1	0	0	0	0	0	0	0	0	0	0	0	0	0	Unknown Protein (AHRD V1)	#N/A	#N/A	#N/A	#N/A	#N/A	#N/A
Solyc00g014790.2	0	0	0	0	0	0	0	0	0	0	0	0	0	0	0	0	0	Unknown Protein (AHRD V1)	#N/A	#N/A	#N/A	#N/A	#N/A	#N/A
Solyc00g014800.1	0	0	0	0	0	0	0	0	0	0	0	0	0	0	0	0	0	Zinc-finger protein 1 (AHRD V1 *-*- D7KX25_ARALY)%3B contains Interpro domain(s) IPR007087 Zinc finger%2C C2H2-type ;_Length	FAMILY NOT NAMED	none	none	cell partHHGO:0044464;organelleHHGO:0043226;nucleusHHGO:0005634;intracellularHHGO:0005622	none	none
Solyc00g014820.2	-1	0	0	0	0	0	0	0	0	0	0	0	0	0	0	0	0	Unknown Protein (AHRD V1)	#N/A	#N/A	#N/A	#N/A	#N/A	#N/A
Solyc00g014830.2	0	0	0	0	0	0	0	0	0	0	0	0	0	0	0	0	0	NADH-quinone oxidoreductase subunit D (AHRD V1 ***- C4YU74_9RICK)%3B contains Interpro domain(s) IPR010219 NADH dehydrogenase I%2C D subunit	NADH-UBIQUINONE OXIDOREDUCTASE 49 KDA SUBUNIT	oxidoreductase activityHHGO:0016491;catalytic activityHHGO:0003824	respiratory electron transport chainHHGO:0022904;oxidative phosphorylationHHGO:0006119;generation of precursor metabolites and energyHHGO:0006091	none	dehydrogenaseHHPC00092;reductaseHHPC00198;oxidoreductaseHHPC00176	none
Solyc00g014850.1	0	0	0	0	0	0	0	0	0	0	0	0	0	0	0	0	0	ORF86 (AHRD V1 ***- B6VJY4_VITVI)	#N/A	#N/A	#N/A	#N/A	#N/A	#N/A
Solyc00g014860.1	0	0	0	0	0	0	0	0	1	0	0	0	0	0	0	-1	0	Unknown Protein (AHRD V1)	#N/A	#N/A	#N/A	#N/A	#N/A	#N/A
Solyc00g016790.1	1	0	0	-1	0	0	0	0	0	0	0	0	0	0	0	0	0	Unknown Protein (AHRD V1)	#N/A	#N/A	#N/A	#N/A	#N/A	#N/A
Solyc00g017540.1	0	0	0	0	0	0	1	0	0	0	0	0	0	0	0	0	0	Signal recognition particle 72 kDa protein homolog (AHRD V1 *-*- SRP72_DICDI)	SIGNAL RECOGNITION PARTICLE 72	bindingHHGO:0005488	none	cytoplasmHHGO:0005737;cell partHHGO:0044464;ribonucleoprotein complexHHGO:0030529;intracellularHHGO:0005622;macromolecular complexHHGO:0032991	none	none
Solyc00g017550.1	0	0	0	0	0	0	0	0	0	0	0	0	0	0	0	0	0	Signal recognition particle 72 kDa protein homolog (AHRD V1 *-*- SRP72_DICDI)	SIGNAL RECOGNITION PARTICLE 72	bindingHHGO:0005488	none	cytoplasmHHGO:0005737;cell partHHGO:0044464;ribonucleoprotein complexHHGO:0030529;intracellularHHGO:0005622;macromolecular complexHHGO:0032991	none	none
Solyc00g019730.1	0	0	0	0	0	0	0	0	0	0	0	0	0	0	0	0	0	Cytochrome c oxidase subunit 3 (AHRD V1 ***- Q5M9V7_TOBAC)%3B contains Interpro domain(s) IPR000298 Cytochrome c oxidase%2C subunit III ;_Length	#N/A	#N/A	#N/A	#N/A	#N/A	#N/A
Solyc00g019740.1	0	0	0	0	0	0	0	0	0	0	0	0	0	0	0	0	0	ATPase subunit 8 (AHRD V1 ***- B6VJW7_VITVI)%3B contains Interpro domain(s) IPR003319 ATPase%2C F0 complex%2C subunit 8%2C mitochondrial%2C plant ;_Length	FAMILY NOT NAMED	none	none	cytoplasmHHGO:0005737;cell partHHGO:0044464;mitochondrionHHGO:0005739;organelleHHGO:0043226;intracellularHHGO:0005622	none	none
Solyc00g019750.1	0	-1	0	0	0	0	0	0	0	0	0	0	0	0	0	0	0	Unknown Protein (AHRD V1)	#N/A	#N/A	#N/A	#N/A	#N/A	#N/A
Solyc00g019950.1	0	0	0	0	0	0	0	0	0	0	0	0	0	0	0	0	0	NADH-quinone oxidoreductase subunit C (AHRD V1 ***- NUOC_MAGSA)%3B contains Interpro domain(s) IPR001268 NADH:ubiquinone oxidoreductase%2C 30 kDa subunit ;_Length	NADH DEHYDROGENASE UBIQUINONE IRON-SULFUR PROTEIN 3	none	none	none	none	none
Solyc00g019970.2	0	0	0	0	0	0	0	0	0	0	0	0	0	0	0	0	0	Unknown Protein (AHRD V1)	#N/A	#N/A	#N/A	#N/A	#N/A	#N/A
Solyc00g019980.2	0	0	0	0	0	0	0	0	0	0	0	0	0	0	0	0	0	Unknown Protein (AHRD V1)	#N/A	#N/A	#N/A	#N/A	#N/A	#N/A
Solyc00g019990.1	0	0	0	0	0	0	0	0	0	0	0	0	0	0	0	0	0	Unknown Protein (AHRD V1)	#N/A	#N/A	#N/A	#N/A	#N/A	#N/A
Solyc00g020000.1	0	0	0	0	0	0	0	0	0	0	0	0	0	0	0	0	0	Unknown Protein (AHRD V1)	#N/A	#N/A	#N/A	#N/A	#N/A	#N/A
Solyc00g020010.1	0	-1	0	0	0	0	0	0	-1	0	0	0	0	-1	-1	0	0	Unknown Protein (AHRD V1)	#N/A	#N/A	#N/A	#N/A	#N/A	#N/A
Solyc00g020020.2	0	0	0	0	0	0	0	0	0	0	0	0	0	0	0	0	0	Unknown Protein (AHRD V1)	#N/A	#N/A	#N/A	#N/A	#N/A	#N/A
Solyc00g020030.1	0	0	0	0	0	0	0	0	0	0	0	0	0	0	0	0	0	Unknown Protein (AHRD V1)	#N/A	#N/A	#N/A	#N/A	#N/A	#N/A
Solyc00g020040.1	0	0	0	0	0	0	0	0	0	0	0	0	0	0	0	0	0	Cytochrome c biogenesis (Fragment) (AHRD V1 ***- A4KXV6_9ROSI)%3B contains Interpro domain(s) IPR003544 Cytochrome c-type biogenesis protein CcmB ;_Length	HEME EXPORTER PROTEIN B	hydrolase activityHHGO:0016787;pyrophosphatase activityHHGO:0016462;transmembrane transporter activityHHGO:0022857;transporter activityHHGO:0005215;catalytic activityHHGO:0003824;ATPase activity, coupled to transmembrane movement of substancesHHGO:0042626	localizationHHGO:0051179;nitrogen compound metabolic processHHGO:0006807;transportHHGO:0006810;catabolic processHHGO:0009056;cellular processHHGO:0009987;nucleobase-containing compound metabolic processHHGO:0006139;metabolic processHHGO:0008152;primary metabolic processHHGO:0044238;phosphate-containing compound metabolic processHHGO:0006796	none	none	none
Solyc00g020540.1	1	1	0	-1	1	-1	1	1	0	0	-1	0	-1	0	0	0	0	Aminotransferase-like protein (AHRD V1 *-*- Q6EQM2_ORYSJ)%3B contains Interpro domain(s) IPR019557 Aminotransferase-like%2C plant mobile domain	EPIDIDYMAL MEMBRANE PROTEIN E9-RELATED	none	none	none	none	none
Solyc00g021630.1	0	0	0	0	0	0	0	0	0	0	0	0	0	0	0	0	0	NADH-ubiquinone oxidoreductase chain 6 (Fragment) (AHRD V1 ***- Q2PZB4_BRAOB)%3B contains Interpro domain(s) IPR001457 NADH:ubiquinone/plastoquinone oxidoreductase%2C chain 6 ;_Length	FAMILY NOT NAMED	none	none	none	none	none
Solyc00g021640.2	0	0	0	0	0	0	0	0	0	0	0	0	0	0	0	0	0	Ribosomal protein S4 (AHRD V1 ***- D5I3A5_CITLA)%3B contains Interpro domain(s) IPR002942 RNA-binding S4	30S 40S RIBOSOMAL PROTEIN	structural constituent of ribosomeHHGO:0003735;nucleic acid bindingHHGO:0003676;RNA bindingHHGO:0003723;structural molecule activityHHGO:0005198;bindingHHGO:0005488	regulation of biological processHHGO:0050789;biological regulationHHGO:0065007;regulation of translationHHGO:0006417;biosynthetic processHHGO:0009058;protein metabolic processHHGO:0019538;cellular processHHGO:0009987;primary metabolic processHHGO:0044238;metabolic processHHGO:0008152;translationHHGO:0006412	cytoplasmHHGO:0005737;cell partHHGO:0044464;organelleHHGO:0043226;ribonucleoprotein complexHHGO:0030529;ribosomeHHGO:0005840;intracellularHHGO:0005622;macromolecular complexHHGO:0032991	ribosomal proteinHHPC00202;RNA binding proteinHHPC00031;nucleic acid bindingHHPC00171	none
Solyc00g021650.1	0	0	0	0	0	0	0	0	0	0	0	0	0	0	0	0	0	Unknown Protein (AHRD V1)	#N/A	#N/A	#N/A	#N/A	#N/A	#N/A
Solyc00g021660.1	-1	0	0	0	0	0	0	0	0	0	0	0	0	0	0	0	0	Neutral invertase-like protein (Fragment) (AHRD V1 ***- Q75UP5_IPOBA)%3B contains Interpro domain(s) IPR006937 Plant neutral invertase	#N/A	#N/A	#N/A	#N/A	#N/A	#N/A
Solyc00g022070.1	0	-1	1	0	-1	0	0	0	0	0	0	0	0	0	0	1	0	Unknown Protein (AHRD V1)	#N/A	#N/A	#N/A	#N/A	#N/A	#N/A
Solyc00g022080.1	0	0	0	0	0	0	0	0	0	0	0	0	0	0	0	0	0	Unknown Protein (AHRD V1)	#N/A	#N/A	#N/A	#N/A	#N/A	#N/A
Solyc00g022090.1	-1	-1	0	0	0	0	0	0	0	0	0	0	0	0	0	0	0	Unknown Protein (AHRD V1)	#N/A	#N/A	#N/A	#N/A	#N/A	#N/A
Solyc00g022100.1	0	0	0	0	0	0	0	0	0	0	0	0	0	0	0	0	0	Ribosomal protein L10 (Fragment) (AHRD V1 ***- D1KY68_SARPR)	#N/A	#N/A	#N/A	#N/A	#N/A	#N/A
Solyc00g022110.2	0	-1	0	0	0	0	0	0	0	0	0	0	0	0	0	0	0	Ribosomal protein L2 (AHRD V1 ***- Q5M9S7_TOBAC)%3B contains Interpro domain(s) IPR002171 Ribosomal protein L2	#N/A	#N/A	#N/A	#N/A	#N/A	#N/A
Solyc00g023470.1	0	-1	1	1	-1	0	0	0	-1	0	0	0	0	0	0	1	0	Pectinesterase (AHRD V1 **** D8SCR0_SELML)%3B contains Interpro domain(s) IPR000070 Pectinesterase%2C catalytic	FAMILY NOT NAMED	hydrolase activityHHGO:0016787;hydrolase activity, acting on ester bondsHHGO:0016788;enzyme inhibitor activityHHGO:0004857;catalytic activityHHGO:0003824;enzyme regulator activityHHGO:0030234	biological regulationHHGO:0065007;regulation of biological processHHGO:0050789;regulation of catalytic activityHHGO:0050790;regulation of molecular functionHHGO:0065009;metabolic processHHGO:0008152	cell partHHGO:0044464	none	none
Solyc00g023570.1	0	0	0	0	0	0	0	0	0	0	0	0	0	0	0	0	0	Unknown Protein (AHRD V1)	#N/A	#N/A	#N/A	#N/A	#N/A	#N/A
Solyc00g023590.2	0	0	0	0	0	0	0	0	0	0	0	0	0	0	0	0	0	Unknown Protein (AHRD V1)	#N/A	#N/A	#N/A	#N/A	#N/A	#N/A
Solyc00g023700.2	0	0	0	0	0	0	0	0	0	0	0	0	0	0	0	0	0	Unknown Protein (AHRD V1)	#N/A	#N/A	#N/A	#N/A	#N/A	#N/A
Solyc00g023710.1	0	0	0	0	0	0	0	0	0	0	0	0	0	0	0	0	0	Unknown Protein (AHRD V1)	#N/A	#N/A	#N/A	#N/A	#N/A	#N/A
Solyc00g024150.2	-1	-1	0	0	0	0	0	0	0	0	0	0	0	0	0	0	0	Pterin-4-alpha-carbinolamine dehydratase (AHRD V1 *-** B6T9C1_MAIZE)%3B contains Interpro domain(s) IPR001533 Transcriptional coactivator/pterin dehydratase	PTERIN-4-ALPHA-CARBINOLAMINE DEHYDRATASE	lyase activityHHGO:0016829;hydro-lyase activityHHGO:0016836;catalytic activityHHGO:0003824	transcription, DNA-dependentHHGO:0006351;transcription from RNA polymerase II promoterHHGO:0006366;nucleobase-containing compound metabolic processHHGO:0006139;primary metabolic processHHGO:0044238;metabolic processHHGO:0008152	none	dehydrataseHHPC00091;lyaseHHPC00144	none
Solyc00g024570.1	1	1	1	0	0	0	0	0	0	0	-1	0	-1	0	0	0	-1	F-box family protein (AHRD V1 ***- B9I3S8_POPTR)%3B contains Interpro domain(s) IPR001810 Cyclin-like F-box	FAMILY NOT NAMED	none	none	none	none	none
Solyc00g025290.1	0	0	0	0	0	0	-1	0	0	0	0	0	0	-1	-1	0	0	Hypothetical protein (nad5 intron) (AHRD V1 **-- Q7M2D8_WHEAT)	#N/A	#N/A	#N/A	#N/A	#N/A	#N/A
Solyc00g025400.2	0	0	0	0	0	0	0	0	0	0	0	0	0	0	0	0	0	Unknown Protein (AHRD V1)	#N/A	#N/A	#N/A	#N/A	#N/A	#N/A
Solyc00g026160.2	0	-1	0	1	-1	1	0	0	0	0	0	0	1	0	0	1	-1	Ferric reductase oxidase (AHRD V1 **** D6RVS5_HORVU)%3B contains Interpro domain(s) IPR013121 Ferric reductase%2C NAD binding	NADPH OXIDASE	none	none	none	none	none
Solyc00g027130.1	1	0	0	0	0	0	0	0	0	0	-1	0	0	0	0	0	0	Sentrin-specific protease 2 (AHRD V1 *-*- SENP2_HUMAN)%3B contains Interpro domain(s) IPR003653 Peptidase C48%2C SUMO/Sentrin/Ubl1 ;_Length	SENTRIN_SUMO-SPECIFIC PROTEASE	hydrolase activityHHGO:0016787;cysteine-type peptidase activityHHGO:0008234;peptidase activityHHGO:0008233;catalytic activityHHGO:0003824	cellular processHHGO:0009987;protein metabolic processHHGO:0019538;primary metabolic processHHGO:0044238;cellular protein modification processHHGO:0006464;metabolic processHHGO:0008152	cell partHHGO:0044464;organelleHHGO:0043226;nucleusHHGO:0005634;intracellularHHGO:0005622	proteaseHHPC00190;hydrolaseHHPC00121	none
Solyc00g027140.1	0	0	0	0	0	0	0	0	0	-1	-1	0	-1	0	0	0	0	Ulp1 protease family C-terminal catalytic domain containing protein (AHRD V1 *-*- Q60D46_SOLDE)	FAMILY NOT NAMED	none	none	none	none	none
Solyc00g027770.2	0	0	0	0	0	0	0	0	0	0	0	0	0	0	0	0	0	Pectinesterase (AHRD V1 **** B9SVI9_RICCO)%3B contains Interpro domain(s) IPR000070 Pectinesterase%2C catalytic	FAMILY NOT NAMED	none	none	none	none	none
Solyc00g028420.1	0	1	0	0	0	0	0	-1	1	0	0	0	0	0	0	-1	0	Unknown Protein (AHRD V1)	#N/A	#N/A	#N/A	#N/A	#N/A	#N/A
Solyc00g028760.1	1	1	0	-1	0	-1	0	0	0	1	0	0	0	0	0	0	0	Unknown Protein (AHRD V1)	#N/A	#N/A	#N/A	#N/A	#N/A	#N/A
Solyc00g030520.2	0	0	0	0	0	0	0	0	0	0	0	0	0	0	0	0	0	Endoplasmic reticulum-Golgi intermediate compartment protein 3 (Predicted) (AHRD V1 *-*- B1MTM4_CALMO)%3B contains Interpro domain(s) IPR012936 Protein of unknown function DUF1692	ENDOPLASMIC RETICULUM-GOLGI INTERMEDIATE COMPARTMENT PROTEIN	none	none	none	none	none
Solyc00g036320.1	1	1	1	-1	0	0	0	1	-1	0	-1	0	-1	0	0	0	0	ARID/BRIGHT DNA binding domain containing protein (AHRD V1 ***- B2CZF7_LOTJA)%3B contains Interpro domain(s) IPR001606 AT-rich interaction region ;_Length	AT-RICH INTERACTIVE DOMAIN-CONTAINING PROTEIN ARID DOMAIN- CONTAINING PROTEIN DEAD RINGER PROTEIN B-CELL REGULATOR OF IGH TRANSCRIPTION BRIGHT	nucleic acid bindingHHGO:0003676;sequence-specific DNA binding transcription factor activityHHGO:0003700;bindingHHGO:0005488;DNA bindingHHGO:0003677	nucleobase-containing compound metabolic processHHGO:0006139;primary metabolic processHHGO:0044238;metabolic processHHGO:0008152	none	transcription factorHHPC00218;nucleic acid bindingHHPC00171	none
Solyc00g036520.1	0	0	0	0	0	0	0	0	0	0	0	0	0	0	0	0	0	Unknown Protein (AHRD V1)	#N/A	#N/A	#N/A	#N/A	#N/A	#N/A
Solyc00g036960.1	1	1	-1	0	0	0	-1	-1	0	0	0	0	-1	0	0	0	1	Unknown Protein (AHRD V1)	HISTONE H1_H5	none	chromatin organizationHHGO:0006325;cellular component organizationHHGO:0016043;organelle organizationHHGO:0006996	none	none	none
Solyc00g039290.1	1	1	0	0	0	0	0	0	0	0	-1	0	-1	0	0	0	0	Zinc-binding protein (AHRD V1 *-*- Q948W7_PEA)%3B contains Interpro domain(s) IPR006734 Protein of unknown function DUF597 ;_Length	FAMILY NOT NAMED	none	none	none	none	none
Solyc00g039990.2	0	0	0	0	0	0	0	0	0	0	0	0	0	0	0	0	0	TRNA nucleotidyltransferase (AHRD V1 ***- Q42867_LUPAL)	TRNA-NUCLEOTIDYLTRANSFERASE_POLY A POLYMERASE FAMILY MEMBER	nucleic acid bindingHHGO:0003676;mRNA bindingHHGO:0003729;RNA bindingHHGO:0003723;transferase activityHHGO:0016740;poly(A) RNA bindingHHGO:0008143;bindingHHGO:0005488;catalytic activityHHGO:0003824;nucleotidyltransferase activityHHGO:0016779	mRNA processingHHGO:0006397;mRNA polyadenylationHHGO:0006378;mRNA 3'-end processingHHGO:0031124;nucleobase-containing compound metabolic processHHGO:0006139;RNA metabolic processHHGO:0016070;metabolic processHHGO:0008152;primary metabolic processHHGO:0044238	none	mRNA polyadenylation factorHHPC00146;mRNA processing factorHHPC00147;transferaseHHPC00220;RNA binding proteinHHPC00031;nucleotidyltransferaseHHPC00174;nucleic acid bindingHHPC00171	none
Solyc00g040490.1	1	1	1	0	-1	0	0	0	1	0	-1	0	-1	0	0	-1	0	Unknown Protein (AHRD V1)	FAMILY NOT NAMED	none	none	none	none	none
Solyc00g041090.1	1	0	1	0	0	0	0	1	-1	0	-1	0	0	0	0	1	0	Vacuolar-processing enzyme (AHRD V1 ***- B9RBP3_RICCO)%3B contains Interpro domain(s) IPR001096 Peptidase C13%2C legumain ;_Length	#N/A	#N/A	#N/A	#N/A	#N/A	#N/A
Solyc00g042640.1	1	1	1	0	0	0	0	0	0	0	-1	0	0	0	0	0	0	Helicase-like protein (AHRD V1 *-*- Q9AYF0_ORYSJ)%3B contains Interpro domain(s) IPR010285 Protein of unknown function DUF889%2C eukaryote	UNCHARACTERIZED	none	none	none	none	none
Solyc00g042840.1	1	1	1	0	0	0	-1	0	-1	0	-1	0	-1	0	0	0	0	F-box domain containing protein (AHRD V1 ***- Q2QXK7_ORYSJ)%3B contains Interpro domain(s) IPR005174 Protein of unknown function DUF295	SEL-1-LIKE PROTEIN	protein bindingHHGO:0005515;bindingHHGO:0005488;enzyme regulator activityHHGO:0030234	none	none	enzyme modulatorHHPC00095	none
Solyc00g044750.1	1	1	0	0	0	1	0	0	0	0	-1	0	-1	0	0	0	0	U1 small nuclear ribonucleoprotein A (AHRD V1 *--- SNRPA_DROME)%3B contains Interpro domain(s) IPR012677 Nucleotide-binding%2C alpha-beta plait ;_Length	U1 SMALL NUCLEAR RIBONUCLEOPROTEIN A_U2 SMALL NUCLEAR RIBONUCLEOPROTEIN B	nucleic acid bindingHHGO:0003676;RNA bindingHHGO:0003723;bindingHHGO:0005488	RNA metabolic processHHGO:0016070;nitrogen compound metabolic processHHGO:0006807;mRNA processingHHGO:0006397;RNA splicing, via transesterification reactionsHHGO:0000375;cellular processHHGO:0009987;nucleobase-containing compound metabolic processHHGO:0006139;RNA splicingHHGO:0008380;primary metabolic processHHGO:0044238;metabolic processHHGO:0008152;mRNA splicing, via spliceosomeHHGO:0000398	none	mRNA processing factorHHPC00147;RNA binding proteinHHPC00031;mRNA splicing factorHHPC00148;nucleic acid bindingHHPC00171	none
Solyc00g046570.1	0	1	0	0	0	0	0	0	0	0	0	0	0	0	0	0	0	Unknown Protein (AHRD V1)	#N/A	#N/A	#N/A	#N/A	#N/A	#N/A
Solyc00g046580.1	0	1	0	0	0	0	0	-1	0	0	0	0	0	0	0	0	1	Serine/threonine-protein phosphatase 7 long form homolog (AHRD V1 **-- PPP7L_ARATH)%3B contains Interpro domain(s) IPR019557 Aminotransferase-like%2C plant mobile domain	FAMILY NOT NAMED	none	mitosisHHGO:0007067	none	none	none
Solyc00g047180.1	-1	0	0	0	0	0	0	0	0	0	0	0	0	0	0	0	0	Unknown Protein (AHRD V1)	#N/A	#N/A	#N/A	#N/A	#N/A	#N/A
Solyc00g047190.1	1	0	1	0	0	1	-1	0	-1	0	0	0	0	0	0	1	0	Unknown Protein (AHRD V1)	#N/A	#N/A	#N/A	#N/A	#N/A	#N/A
Solyc00g047200.1	0	0	0	0	0	0	0	0	0	0	0	0	0	0	0	0	0	Cytochrome b (AHRD V1 ***- Q95871_TOBAC)%3B contains Interpro domain(s) IPR016175 Cytochrome b/b6 ;_Length	#N/A	#N/A	#N/A	#N/A	#N/A	#N/A
Solyc00g047700.2	1	1	0	1	-1	1	0	0	0	0	0	0	0	0	0	0	0	Unknown Protein (AHRD V1)	#N/A	#N/A	#N/A	#N/A	#N/A	#N/A
Solyc00g048410.1	0	0	0	0	0	0	0	-1	0	0	0	0	0	0	0	0	0	Unknown Protein (AHRD V1)	FAMILY NOT NAMED	none	none	none	none	none
Solyc00g049210.1	0	-1	0	0	0	0	0	0	0	0	0	0	0	0	0	0	0	Cytochrome c-type biogenesis protein CcmF (AHRD V1 *-*- Q1ZIX1_9GAMM)%3B contains Interpro domain(s) IPR003569 Cytochrome c-type biogenesis protein CcbS ;_Length	FAMILY NOT NAMED	none	none	none	none	none
Solyc00g049220.1	0	0	0	0	0	0	0	0	0	0	0	0	0	0	0	0	0	Unknown Protein (AHRD V1)	#N/A	#N/A	#N/A	#N/A	#N/A	#N/A
Solyc00g049520.2	0	0	0	0	0	0	0	0	0	0	0	0	0	0	0	0	0	Unknown Protein (AHRD V1)	#N/A	#N/A	#N/A	#N/A	#N/A	#N/A
Solyc00g050130.1	0	0	0	0	0	0	0	0	0	0	0	0	0	0	0	0	0	UDP-glucose glucosyltransferase (AHRD V1 **** D2KTV5_LOTJA)%3B contains Interpro domain(s) IPR002213 UDP-glucuronosyl/UDP-glucosyltransferase	GLUCOSYL_GLUCURONOSYL TRANSFERASES	transferase activityHHGO:0016740;transferase activity, transferring glycosyl groupsHHGO:0016757;catalytic activityHHGO:0003824	metabolic processHHGO:0008152	cell partHHGO:0044464;organelleHHGO:0043226;intracellularHHGO:0005622	none	none
Solyc00g052430.2	0	-1	0	0	0	0	0	0	0	0	0	0	0	0	0	0	0	Cytochrome c biogenesis FC (AHRD V1 ***- D5I3C4_CITLA)	FAMILY NOT NAMED	none	none	none	none	none
Solyc00g052530.2	0	0	0	0	0	0	0	0	0	0	0	0	0	0	0	0	0	Unknown Protein (AHRD V1)	#N/A	#N/A	#N/A	#N/A	#N/A	#N/A
Solyc00g052540.1	-1	0	0	0	0	0	0	0	0	0	0	0	0	0	0	0	0	Unknown Protein (AHRD V1)	#N/A	#N/A	#N/A	#N/A	#N/A	#N/A
Solyc00g052940.2	0	-1	0	0	0	0	0	0	0	0	0	0	0	0	0	0	0	Nodulin-like protein (AHRD V1 **-- B6TIX8_MAIZE)%3B contains Interpro domain(s) IPR000620 Protein of unknown function DUF6%2C transmembrane	FAMILY NOT NAMED	transmembrane transporter activityHHGO:0022857;transporter activityHHGO:0005215	localizationHHGO:0051179;cellular processHHGO:0009987;transportHHGO:0006810	cell partHHGO:0044464;membraneHHGO:0016020;plasma membraneHHGO:0005886	none	none
Solyc00g053440.2	-1	0	0	0	0	0	0	0	0	0	0	0	0	0	0	0	0	Transmembrane BAX inhibitor motif-containing protein 4 (AHRD V1 **-- B6T5N6_MAIZE)%3B contains Interpro domain(s) IPR006214 Uncharacterised protein family UPF0005	#N/A	#N/A	#N/A	#N/A	#N/A	#N/A
Solyc00g053740.1	1	1	0	-1	0	0	0	0	0	0	-1	0	0	0	0	0	0	ARID/BRIGHT DNA-binding domain-containing protein (AHRD V1 ***- D7KTU4_ARALY)%3B contains Interpro domain(s) IPR008978 HSP20-like chaperone	AT-RICH INTERACTIVE DOMAIN-CONTAINING PROTEIN ARID DOMAIN- CONTAINING PROTEIN DEAD RINGER PROTEIN B-CELL REGULATOR OF IGH TRANSCRIPTION BRIGHT	nucleic acid bindingHHGO:0003676;sequence-specific DNA binding transcription factor activityHHGO:0003700;bindingHHGO:0005488;DNA bindingHHGO:0003677	nucleobase-containing compound metabolic processHHGO:0006139;primary metabolic processHHGO:0044238;metabolic processHHGO:0008152	none	transcription factorHHPC00218;nucleic acid bindingHHPC00171	none
Solyc00g056680.1	0	0	0	0	0	0	0	0	0	0	0	0	0	0	0	0	0	Lipase-like protein (AHRD V1 ***- Q949E1_ORYSA)%3B contains Interpro domain(s) IPR002921 Lipase%2C class 3 ;_Length	FAMILY NOT NAMED	none	none	none	none	none
Solyc00g057280.1	1	1	0	0	0	-1	-1	0	-1	0	0	0	0	0	0	0	0	B3 domain-containing protein Os02g0598200 (AHRD V1 ***- Y2982_ORYSJ)%3B contains Interpro domain(s) IPR003340 Transcriptional factor B3 ;_Length	FAMILY NOT NAMED	none	none	none	none	none
Solyc00g057880.2	1	0	-1	0	0	0	0	0	0	0	0	0	0	0	0	0	0	Unknown Protein (AHRD V1)	#N/A	#N/A	#N/A	#N/A	#N/A	#N/A
Solyc00g058280.1	0	1	0	0	0	0	0	0	0	0	0	0	0	0	0	0	0	Unknown Protein (AHRD V1)	#N/A	#N/A	#N/A	#N/A	#N/A	#N/A
Solyc00g058480.1	1	1	0	0	0	0	0	0	0	0	0	0	-1	0	0	0	0	Paired amphipathic helix protein Sin3-like 1 (AHRD V1 *-*- SNL1_ARATH)%3B contains Interpro domain(s) IPR003822 Paired amphipathic helix ;_Length	SIN3B-RELATED	RNA polymerase II transcription factor binding transcription factor activityHHGO:0001076;hydrolase activityHHGO:0016787;protein bindingHHGO:0005515;deacetylase activityHHGO:0019213;protein binding transcription factor activityHHGO:0000988;transcription cofactor activityHHGO:0003712;transcription factor binding transcription factor activityHHGO:0000989;bindingHHGO:0005488;catalytic activityHHGO:00…	transcription, DNA-dependentHHGO:0006351;regulation of transcription from RNA polymerase II promoterHHGO:0006357;RNA metabolic processHHGO:0016070;cellular component organizationHHGO:0016043;biosynthetic processHHGO:0009058;cellular processHHGO:0009987;transcription from RNA polymerase II promoterHHGO:0006366;nucleobase-containing compound metabolic processHHGO:0006139;cellular protein modificati…	cell partHHGO:0044464;nucleusHHGO:0005634;protein complexHHGO:0043234;chromosomeHHGO:0005694;intracellularHHGO:0005622;nucleoplasmHHGO:0005654;macromolecular complexHHGO:0032991;organelleHHGO:0043226	DNA binding proteinHHPC00009;deacetylaseHHPC00087;chromatin_chromatin-binding proteinHHPC00077;transcription factorHHPC00218;nucleic acid bindingHHPC00171;hydrolaseHHPC00121	Huntington diseaseHHP00029 Sin3AHHP00771
Solyc00g059100.2	0	0	-1	0	0	0	0	0	0	0	0	0	0	0	0	0	0	WD-repeat protein-like (AHRD V1 **-- Q9FNN2_ARATH)%3B contains Interpro domain(s) IPR020472 G-protein beta WD-40 repeat%2C region	WD REPEAT PROTEIN 26-RELATED	none	none	none	none	none
Solyc00g059500.1	0	0	0	0	0	0	-1	0	0	0	0	0	0	0	0	0	0	CDP-alcohol phosphatidyltransferase (AHRD V1 **-- D3BS60_POLPA)	ETHANOLAMINEPHOSPHOTRANSFERASE	none	none	none	none	none
Solyc00g068970.2	-1	-1	1	1	0	0	1	1	-1	0	0	0	0	1	-1	0	0	Cytochrome P450 like_TBP (AHRD V1 ***- O04892_TOBAC)	FAMILY NOT NAMED	none	none	none	none	none
Solyc00g068980.1	0	0	0	-1	1	0	0	0	-1	0	0	0	0	0	0	1	0	Unknown Protein (AHRD V1)	#N/A	#N/A	#N/A	#N/A	#N/A	#N/A
Solyc00g069880.2	-1	-1	0	0	0	0	0	0	0	0	0	0	0	0	0	0	0	Unknown Protein (AHRD V1)	#N/A	#N/A	#N/A	#N/A	#N/A	#N/A
Solyc00g070680.1	1	1	0	0	0	0	0	-1	0	0	-1	0	0	0	0	0	0	Unknown Protein (AHRD V1)	#N/A	#N/A	#N/A	#N/A	#N/A	#N/A
Solyc00g071180.2	1	0	0	1	0	0	0	0	0	0	-1	0	0	0	0	0	-1	Cysteine proteinase inhibitor (AHRD V1 *-** Q2VY67_9ERIC)%3B contains Interpro domain(s) IPR000010 Proteinase inhibitor I25%2C cystatin	CYSTATIN FAMILY MEMBER	cysteine-type endopeptidase inhibitor activityHHGO:0004869;protein bindingHHGO:0005515;enzyme inhibitor activityHHGO:0004857;peptidase inhibitor activityHHGO:0030414;bindingHHGO:0005488;enzyme regulator activityHHGO:0030234	protein metabolic processHHGO:0019538;primary metabolic processHHGO:0044238;proteolysisHHGO:0006508;metabolic processHHGO:0008152	none	protease inhibitorHHPC00191;enzyme modulatorHHPC00095;cysteine protease inhibitorHHPC00082	none
Solyc00g072100.2	0	0	0	0	0	0	0	0	0	0	0	0	0	0	0	0	0	LTRGag-pol-polymerase 3 (AHRD V1 *-*- B2BXJ4_ARALY)	#N/A	#N/A	#N/A	#N/A	#N/A	#N/A
Solyc00g072800.2	-1	-1	0	0	0	0	0	0	0	0	0	0	0	0	0	0	0	Unknown Protein (AHRD V1)	#N/A	#N/A	#N/A	#N/A	#N/A	#N/A
Solyc00g073200.1	0	1	-1	0	1	0	-1	-1	1	0	0	0	0	0	0	-1	0	Transposon protein-like (AHRD V1 *-*- Q9FN97_ARATH)	UNCHARACTERIZED	none	none	none	none	none
Solyc00g075030.2	1	0	0	0	0	1	-1	0	0	0	0	0	0	0	0	0	0	Gag polyprotein (AHRD V1 *-*- GAG_FIVPE)%3B contains Interpro domain(s) IPR001878 Zinc finger%2C CCHC-type	FAMILY NOT NAMED	none	none	none	none	none
Solyc00g075040.1	1	0	0	0	0	1	0	0	0	0	0	0	0	0	0	0	0	Transposon Ty1-A Gag-Pol polyprotein (AHRD V1 ***- YA11B_YEAST)%3B contains Interpro domain(s) IPR013103 Reverse transcriptase%2C RNA-dependent DNA polymerase	GAG-POL-RELATED RETROTRANSPOSON	none	none	none	none	none
Solyc00g082150.2	0	0	0	0	0	0	0	0	0	0	0	0	0	0	0	0	0	Kinesin light chain (AHRD V1 **-- B6SKU4_MAIZE)%3B contains Interpro domain(s) IPR011990 Tetratricopeptide-like helical	KINESIN LIGHT CHAIN	none	protein targetingHHGO:0006605	cytoskeletonHHGO:0005856;microtubuleHHGO:0005874	none	none
Solyc00g084760.1	1	1	0	0	0	0	0	0	0	0	-1	0	0	0	0	0	0	RNase H family protein (AHRD V1 ***- Q0KIQ6_SOLDE)	#N/A	#N/A	#N/A	#N/A	#N/A	#N/A
Solyc00g084870.2	-1	-1	0	0	0	0	1	0	0	0	0	0	0	0	0	0	0	TCP family transcription factor (AHRD V1 *-** A6MCZ2_9ORYZ)%3B contains Interpro domain(s) IPR005333 Transcription factor%2C TCP	FAMILY NOT NAMED	none	none	none	none	none
Solyc00g085070.2	0	0	0	0	0	0	0	0	0	0	0	0	0	0	0	0	0	Squalene monooxygenase (AHRD V1 ***- Q506K3_DATIN)%3B contains Interpro domain(s) IPR013698 Squalene epoxidase	SQUALENE MONOOXYGENASE	oxidoreductase activityHHGO:0016491;catalytic activityHHGO:0003824	none	none	oxygenaseHHPC00177;oxidoreductaseHHPC00176	Cholesterol biosynthesisHHP00014 Squalene monooxygenasHHP00494
Solyc00g090430.2	1	0	0	0	0	0	1	0	1	0	0	0	0	0	0	0	0	Os08g0100600 protein (Fragment) (AHRD V1 *-*- Q0J8P7_ORYSJ)%3B contains Interpro domain(s) IPR008507 Protein of unknown function DUF789	FAMILY NOT NAMED	none	none	none	none	none
Solyc00g090870.2	1	1	0	0	0	0	0	0	0	0	-1	0	-1	0	0	0	0	5-AMP-activated protein kinase subunit beta-1 (AHRD V1 *-*- C1BJ92_OSMMO)%3B contains Interpro domain(s) IPR006828 5-AMP-activated protein kinase%2C beta subunit%2C complex-interacting region	#N/A	#N/A	#N/A	#N/A	#N/A	#N/A
Solyc00g091170.2	0	0	0	0	0	0	0	0	0	0	0	0	0	0	0	0	0	ATP binding protein (AHRD V1 ***- B6TPV9_MAIZE)	INTERFERON-INDUCED PROTEIN 44	none	none	none	none	none
Solyc00g093000.1	0	0	0	0	0	0	0	0	0	0	0	0	0	0	0	0	0	Unknown Protein (AHRD V1)	#N/A	#N/A	#N/A	#N/A	#N/A	#N/A
Solyc00g093310.1	0	1	0	0	0	0	0	0	0	0	0	0	0	0	0	0	0	Unknown Protein (AHRD V1)	#N/A	#N/A	#N/A	#N/A	#N/A	#N/A
Solyc00g094020.1	1	0	0	0	0	0	0	0	0	0	-1	0	0	0	0	0	0	Replication protein C (AHRD V1 *-*- B9K4F1_AGRVS)%3B contains Interpro domain(s) IPR005090 Replication protein C ;_Length	#N/A	#N/A	#N/A	#N/A	#N/A	#N/A
Solyc00g094520.1	0	0	0	0	0	0	0	0	0	0	0	0	0	0	0	0	0	Unknown Protein (AHRD V1)	#N/A	#N/A	#N/A	#N/A	#N/A	#N/A
Solyc00g094530.1	0	0	0	0	0	0	0	0	0	0	0	0	0	0	0	0	0	NADH-ubiquinone oxidoreductase chain 1 (AHRD V1 ***- Q5M9U6_TOBAC)%3B contains Interpro domain(s) IPR001694 NADH:ubiquinone oxidoreductase%2C subunit 1 ;_Length	NADH DEHYDROGENASE SUBUNIT 1	oxidoreductase activityHHGO:0016491;catalytic activityHHGO:0003824	respiratory electron transport chainHHGO:0022904;oxidative phosphorylationHHGO:0006119;generation of precursor metabolites and energyHHGO:0006091	none	dehydrogenaseHHPC00092;reductaseHHPC00198;oxidoreductaseHHPC00176	none
Solyc00g094540.1	-1	0	0	0	0	0	0	0	0	0	0	0	0	0	0	0	0	Unknown Protein (AHRD V1)	#N/A	#N/A	#N/A	#N/A	#N/A	#N/A
Solyc00g094550.1	0	-1	0	0	0	0	0	0	0	0	0	0	0	0	0	0	0	Unknown Protein (AHRD V1)	#N/A	#N/A	#N/A	#N/A	#N/A	#N/A
Solyc00g094850.1	-1	1	-1	0	0	0	1	0	1	0	0	0	0	0	0	-1	0	Unknown Protein (AHRD V1)	#N/A	#N/A	#N/A	#N/A	#N/A	#N/A
Solyc00g096460.1	0	1	0	0	0	0	0	0	0	0	0	0	0	0	0	0	0	AT4G08310 protein (Fragment) (AHRD V1 ***- B9DFL6_ARATH)	#N/A	#N/A	#N/A	#N/A	#N/A	#N/A
Solyc00g097960.1	0	0	0	0	0	0	0	0	0	0	0	0	0	0	0	0	0	Unknown Protein (AHRD V1)	#N/A	#N/A	#N/A	#N/A	#N/A	#N/A
Solyc00g098560.2	0	0	0	0	0	0	0	0	0	0	0	0	0	0	0	0	0	GDSL esterase/lipase At5g03980 (AHRD V1 **** GDL74_ARATH)%3B contains Interpro domain(s) IPR001087 Lipase%2C GDSL	ZINC FINGER FYVE DOMAIN CONTAINING PROTEIN	none	none	none	none	none
Solyc00g099580.1	0	0	0	0	0	0	0	0	0	0	0	0	0	0	0	0	0	Gamma-glutamyltranspeptidase (AHRD V1 ***- D4Z6K6_SPHJU)%3B contains Interpro domain(s) IPR000101 Gamma-glutamyltranspeptidase ;_Length	GAMMA GLUTAMYL TRANSPEPTIDASES	hydrolase activityHHGO:0016787;transferase activity, transferring acyl groupsHHGO:0016746;transferase activityHHGO:0016740;peptidase activityHHGO:0008233;catalytic activityHHGO:0003824	cellular amino acid metabolic processHHGO:0006520;protein metabolic processHHGO:0019538;primary metabolic processHHGO:0044238;proteolysisHHGO:0006508;cellular protein modification processHHGO:0006464;metabolic processHHGO:0008152	none	acyltransferaseHHPC00042;transferaseHHPC00220;proteaseHHPC00190;hydrolaseHHPC00121	none
Solyc00g102000.1	-1	-1	1	1	0	0	1	1	-1	0	0	0	0	1	-1	0	0	Unknown Protein (AHRD V1)	FAMILY NOT NAMED	none	none	none	none	none
Solyc00g105350.1	0	0	0	0	0	0	0	0	0	0	0	0	0	0	0	0	0	Mutator-like transposase-like (AHRD V1 *--- Q9FH11_ARATH)%3B contains Interpro domain(s) IPR004332 Transposase%2C MuDR%2C plant	FAMILY NOT NAMED	none	mitosisHHGO:0007067	none	none	none
Solyc00g105750.1	0	0	0	0	0	0	0	0	0	0	0	0	0	0	0	0	0	Mutator-like transposase (AHRD V1 *--- Q94HK4_ORYSA)%3B contains Interpro domain(s) IPR004332 Transposase%2C MuDR%2C plant ;_Length	FAMILY NOT NAMED	none	mitosisHHGO:0007067	none	none	none
Solyc00g106650.1	-1	0	0	0	0	0	0	0	0	0	0	0	0	0	0	0	0	BZIP transcription factor family protein expressed (AHRD V1 *--- Q2R8T2_ORYSJ)	#N/A	#N/A	#N/A	#N/A	#N/A	#N/A
Solyc00g107050.1	0	0	-1	1	0	0	-1	-1	0	-1	-1	0	-1	0	0	-1	-1	Nuclear transcription factor Y subunit C-1 (AHRD V1 *-*- B6SWV5_MAIZE)%3B contains Interpro domain(s) IPR003958 Transcription factor CBF/NF-Y/archaeal histone ;_Length	HISTONE-LIKE TRANSCRIPTION FACTOR CCAAT-RELATED	DNA-directed DNA polymerase activityHHGO:0003887;nucleic acid bindingHHGO:0003676;transferase activityHHGO:0016740;sequence-specific DNA binding transcription factor activityHHGO:0003700;bindingHHGO:0005488;catalytic activityHHGO:0003824;chromatin bindingHHGO:0003682;DNA bindingHHGO:0003677	transcription, DNA-dependentHHGO:0006351;regulation of transcription from RNA polymerase II promoterHHGO:0006357;regulation of carbohydrate metabolic processHHGO:0006109;transcription from RNA polymerase II promoterHHGO:0006366;carbohydrate metabolic processHHGO:0005975;nucleobase-containing compound metabolic processHHGO:0006139;DNA metabolic processHHGO:0006259;primary metabolic processHHGO:004…	nucleusHHGO:0005634;intracellularHHGO:0005622	DNA-directed DNA polymeraseHHPC00018;DNA binding proteinHHPC00009;transcription factorHHPC00218;chromatin_chromatin-binding proteinHHPC00077;nucleic acid bindingHHPC00171	Gonadotropin-releasing hormone receptor pathwayHHP06664 NF-YHHP06742
Solyc00g110370.1	0	0	0	0	0	0	0	0	1	0	0	0	0	0	0	0	0	Unknown Protein (AHRD V1)%3B contains Interpro domain(s) IPR012287 Homeodomain-related ;_Length	FAMILY NOT NAMED	none	none	none	none	none
Solyc00g110870.2	0	0	0	0	0	0	0	0	0	0	0	0	0	0	0	0	0	Receptor like kinase%2C RLK	#N/A	#N/A	#N/A	#N/A	#N/A	#N/A
Solyc00g111770.1	-1	-1	0	-1	0	0	-1	0	-1	0	0	0	1	0	0	0	0	Unknown Protein (AHRD V1)	#N/A	#N/A	#N/A	#N/A	#N/A	#N/A
Solyc00g112190.2	1	1	0	-1	0	1	0	0	0	0	0	0	0	0	0	0	0	Unknown Protein (AHRD V1)	#N/A	#N/A	#N/A	#N/A	#N/A	#N/A
Solyc00g112930.2	0	0	0	0	0	0	0	0	0	0	0	0	0	0	0	0	0	Alpha-N-acetylglucosaminidase (AHRD V1 ***- Q9ZR45_TOBAC)%3B contains Interpro domain(s) IPR007781 Alpha-N-acetylglucosaminidase	ALPHA-N-ACETYLGLUCOSAMINIDASE	none	none	none	none	none
Solyc00g118680.2	0	0	0	0	0	0	0	0	0	0	0	0	0	0	0	0	0	Unknown Protein (AHRD V1)	#N/A	#N/A	#N/A	#N/A	#N/A	#N/A
Solyc00g118690.1	0	-1	0	0	0	0	0	0	0	0	0	0	0	0	0	0	0	NADH-ubiquinone oxidoreductase chain 1 (AHRD V1 ***- Q5MA12_TOBAC)%3B contains Interpro domain(s) IPR001694 NADH:ubiquinone oxidoreductase%2C subunit 1 ;_Length	NADH DEHYDROGENASE SUBUNIT 1	oxidoreductase activityHHGO:0016491;catalytic activityHHGO:0003824	respiratory electron transport chainHHGO:0022904;oxidative phosphorylationHHGO:0006119;generation of precursor metabolites and energyHHGO:0006091	none	dehydrogenaseHHPC00092;reductaseHHPC00198;oxidoreductaseHHPC00176	none
Solyc00g121730.1	0	0	0	0	0	0	0	0	0	0	0	0	0	0	0	0	0	%26aposchromo%26apos domain containing protein (AHRD V1 *--- Q6L3Q3_SOLDE)%3B contains Interpro domain(s) IPR005162 Retrotransposon gag protein ;_Length	#N/A	#N/A	#N/A	#N/A	#N/A	#N/A
Solyc00g125980.1	0	-1	0	0	-1	0	0	0	-1	0	0	0	0	0	0	1	0	NADH-ubiquinone oxidoreductase chain 2 (AHRD V1 ***- NU2M_BETVU)	#N/A	#N/A	#N/A	#N/A	#N/A	#N/A
Solyc00g125990.1	0	-1	0	0	0	0	0	0	0	0	0	0	0	0	0	0	0	NADH-quinone oxidoreductase subunit N (AHRD V1 ***- B1LUM3_METRJ)%3B contains Interpro domain(s) IPR001750 NADH:ubiquinone/plastoquinone oxidoreductase ;_Length	NADH DEHYDROGENASE	oxidoreductase activityHHGO:0016491;catalytic activityHHGO:0003824	respiratory electron transport chainHHGO:0022904;oxidative phosphorylationHHGO:0006119;generation of precursor metabolites and energyHHGO:0006091	none	dehydrogenaseHHPC00092;reductaseHHPC00198;oxidoreductaseHHPC00176	none
Solyc00g126000.1	0	-1	1	0	0	0	0	0	0	0	0	0	0	0	-1	0	0	NADH-ubiquinone oxidoreductase chain 2 (AHRD V1 ***- NU2M_BETVU)	#N/A	#N/A	#N/A	#N/A	#N/A	#N/A
Solyc00g126010.1	0	-1	1	0	0	0	0	0	0	0	0	0	0	0	-1	0	0	Uncharacterized mitochondrial protein AtMg01330 (AHRD V1 ***- M1330_ARATH)	#N/A	#N/A	#N/A	#N/A	#N/A	#N/A
Solyc00g127660.2	0	0	0	0	0	0	0	0	0	0	0	0	0	0	0	0	0	Unknown Protein (AHRD V1)	#N/A	#N/A	#N/A	#N/A	#N/A	#N/A
Solyc00g127670.1	1	0	0	0	0	0	0	0	0	0	0	0	0	0	0	1	0	Membrane protein (AHRD V1 ***- B6TDF9_MAIZE)	FAMILY NOT NAMED	none	none	none	none	none
Solyc00g127870.2	0	0	0	0	0	0	0	0	0	0	0	0	0	0	0	0	0	Phosphatidylinositol N-acetylglucosaminyltransferase subunit P (AHRD V1 ***- B6TUG3_MAIZE)%3B contains Interpro domain(s) IPR013717 PIG-P	PHOSPHATIDYLINOSITOL N-ACETYLGLUCOSAMINYLTRANSFERASE SUBUNIT P DOWN SYNDROME CRITICAL REGION PROTEIN 5 -RELATED	none	lipid metabolic processHHGO:0006629;biosynthetic processHHGO:0009058;cellular processHHGO:0009987;protein metabolic processHHGO:0019538;phospholipid metabolic processHHGO:0006644;protein lipidationHHGO:0006497;primary metabolic processHHGO:0044238;phosphate-containing compound metabolic processHHGO:0006796;metabolic processHHGO:0008152;cellular protein modification processHHGO:0006464	cytoplasmHHGO:0005737;cell partHHGO:0044464;protein complexHHGO:0043234;intracellularHHGO:0005622;macromolecular complexHHGO:0032991;nuclear outer membrane-endoplasmic reticulum membrane networkHHGO:0042175;membraneHHGO:0016020;endoplasmic reticulumHHGO:0005783;organelleHHGO:0043226	glycosyltransferaseHHPC00111;transferaseHHPC00220	none
Solyc00g128870.2	0	0	0	-1	0	0	0	0	0	0	0	0	0	0	0	0	0	Nudix hydrolase 1 (AHRD V1 ***- A6ANR4_VIBHA)%3B contains Interpro domain(s) IPR000086 NUDIX hydrolase domain	8-OXO-DGTP DIPHOSPHATES NUDT15	none	none	none	none	none
Solyc00g131610.1	1	1	1	0	-1	0	0	-1	0	1	-1	0	-1	0	0	1	-1	Disease resistance response (AHRD V1 ***- D7KM73_ARALY)%3B contains Interpro domain(s) IPR004265 Plant disease resistance response protein	NUCLEOPORIN-RELATED	none	none	none	none	none
Solyc00g131710.1	0	0	0	0	0	0	0	0	0	0	0	0	0	0	0	0	0	Pol polyprotein (AHRD V1 *-*- POL_MLVFP)%3B contains Interpro domain(s) IPR001584 Integrase%2C catalytic core ;_Length	#N/A	#N/A	#N/A	#N/A	#N/A	#N/A
Solyc00g136560.2	0	0	0	0	0	0	0	0	0	0	0	0	0	0	0	0	0	Undecaprenyl pyrophosphate synthase (AHRD V1 *-*- D8G636_9CYAN)%3B contains Interpro domain(s) IPR001441 Di-trans-poly-cis-decaprenylcistransferase-like	DEHYDRODOLICHYL DIPHOSPHATE SYNTHASE	transferase activity, transferring acyl groupsHHGO:0016746;transferase activityHHGO:0016740;catalytic activityHHGO:0003824	protein metabolic processHHGO:0019538;protein glycosylationHHGO:0006486;primary metabolic processHHGO:0044238;translationHHGO:0006412;cellular protein modification processHHGO:0006464;metabolic processHHGO:0008152	none	acyltransferaseHHPC00042;transferaseHHPC00220	none
Solyc00g140060.2	0	0	-1	0	0	0	0	0	0	0	0	0	0	0	0	0	0	Tripeptidyl peptidase II (AHRD V1 ***- Q5VZU9_HUMAN)%3B contains Interpro domain(s) IPR015500 Peptidase S8%2C subtilisin-related	PROPROTEIN CONVERTASE SUBTILISIN_KEXIN	hydrolase activityHHGO:0016787;serine-type peptidase activityHHGO:0008236;peptidase activityHHGO:0008233;catalytic activityHHGO:0003824	metabolic processHHGO:0008152	none	serine proteaseHHPC00203;proteaseHHPC00190;hydrolaseHHPC00121	none
Solyc00g141560.1	1	0	0	0	0	0	0	0	0	0	0	0	0	0	0	0	0	Unknown Protein (AHRD V1)%3B contains Interpro domain(s) IPR016027 Nucleic acid-binding%2C OB-fold-like	#N/A	#N/A	#N/A	#N/A	#N/A	#N/A
Solyc00g142160.1	1	0	0	0	0	0	0	0	0	0	0	0	0	0	0	0	0	Unknown Protein (AHRD V1)	#N/A	#N/A	#N/A	#N/A	#N/A	#N/A
Solyc00g142170.2	1	0	0	0	0	0	0	0	1	0	0	0	0	0	0	0	0	RNA-dependent RNA polymerase (AHRD V1 *-*- Q18L78_9VIRU)%3B contains Interpro domain(s) IPR008686 RNA-dependent RNA polymerase%2C mitoviral	FAMILY NOT NAMED	none	none	none	none	none
Solyc00g143770.1	0	0	0	0	0	0	0	0	0	0	0	0	0	0	0	0	0	Unknown Protein (AHRD V1)	#N/A	#N/A	#N/A	#N/A	#N/A	#N/A
Solyc00g147570.2	0	1	0	0	0	0	0	0	0	0	0	0	0	0	0	0	0	Gelsolin (Fragment) (AHRD V1 **-- C0PU67_SALSA)%3B contains Interpro domain(s) IPR007122 Gelsolin	VILLIN	cytoskeletal protein bindingHHGO:0008092;protein bindingHHGO:0005515;structural molecule activityHHGO:0005198;structural constituent of cytoskeletonHHGO:0005200;actin bindingHHGO:0003779;bindingHHGO:0005488	cellular component organizationHHGO:0016043;cellular processHHGO:0009987	cytoskeletonHHGO:0005856;actin cytoskeletonHHGO:0015629;intracellularHHGO:0005622	actin family cytoskeletal proteinHHPC00041;cytoskeletal proteinHHPC00085;non-motor actin binding proteinHHPC00165	none
Solyc00g147770.1	0	-1	0	0	0	0	0	0	0	0	0	0	0	0	0	1	0	HAT family dimerisation domain containing protein (AHRD V1 ***- Q2QPA8_ORYSJ)%3B contains Interpro domain(s) IPR008906 HAT dimerisation ;_Length	FAMILY NOT NAMED	none	none	none	none	none
Solyc00g153680.1	0	0	0	0	0	0	0	0	0	0	0	0	0	0	0	0	0	Serine/threonine protein kinase (AHRD V1 *-*- D0NNA3_PHYIN)%3B contains Interpro domain(s) IPR002290 Serine/threonine protein kinase ;_Length	SERINE_THREONINE-PROTEIN KINASE WNK WITH NO LYSINE -RELATED	none	none	none	none	none
Solyc00g153980.1	0	-1	0	0	0	0	0	0	0	0	0	0	0	0	0	0	0	Unknown Protein (AHRD V1)	#N/A	#N/A	#N/A	#N/A	#N/A	#N/A
Solyc00g156980.2	0	0	0	0	-1	-1	0	-1	1	0	0	0	0	0	0	0	0	Choline dehydrogenase (AHRD V1 **-- A5L8M4_9GAMM)%3B contains Interpro domain(s) IPR008671 Lycopene beta and epsilon cyclase	#N/A	#N/A	#N/A	#N/A	#N/A	#N/A
Solyc00g157180.2	1	1	0	0	0	1	0	0	0	0	0	0	0	0	0	0	0	cDNA clone J033046E14 full insert sequence (AHRD V1 *--- B7EM90_ORYSJ)	U1 SMALL NUCLEAR RIBONUCLEOPROTEIN A_U2 SMALL NUCLEAR RIBONUCLEOPROTEIN B	nucleic acid bindingHHGO:0003676;RNA bindingHHGO:0003723;bindingHHGO:0005488	RNA metabolic processHHGO:0016070;nitrogen compound metabolic processHHGO:0006807;mRNA processingHHGO:0006397;RNA splicing, via transesterification reactionsHHGO:0000375;cellular processHHGO:0009987;nucleobase-containing compound metabolic processHHGO:0006139;RNA splicingHHGO:0008380;primary metabolic processHHGO:0044238;metabolic processHHGO:0008152;mRNA splicing, via spliceosomeHHGO:0000398	none	mRNA processing factorHHPC00147;RNA binding proteinHHPC00031;mRNA splicing factorHHPC00148;nucleic acid bindingHHPC00171	none
Solyc00g164680.1	0	0	0	0	0	0	0	0	0	0	0	0	0	0	0	0	0	ABC transporter G family member 11 (AHRD V1 ***- AB11G_ARATH)%3B contains Interpro domain(s) IPR013525 ABC-2 type transporter ;_Length	ATP-BINDING CASSETTE TRANSPORTER	pyrophosphatase activityHHGO:0016462;hydrolase activityHHGO:0016787;transmembrane transporter activityHHGO:0022857;transporter activityHHGO:0005215;catalytic activityHHGO:0003824;ATPase activity, coupled to transmembrane movement of substancesHHGO:0042626	localizationHHGO:0051179;catabolic processHHGO:0009056;cellular processHHGO:0009987;nucleobase-containing compound metabolic processHHGO:0006139;nitrogen compound metabolic processHHGO:0006807;metabolic processHHGO:0008152;transportHHGO:0006810;phosphate-containing compound metabolic processHHGO:0006796;primary metabolic processHHGO:0044238	cell partHHGO:0044464;membraneHHGO:0016020;integral to membraneHHGO:0016021;plasma membraneHHGO:0005886	ATP-binding cassette (ABC) transporterHHPC00003;transporterHHPC00227	none
Solyc00g166490.1	0	0	0	0	0	0	-1	0	0	0	-1	0	0	0	0	0	0	Ulp1 protease family C-terminal catalytic domain containing protein (AHRD V1 *-*- Q60D46_SOLDE)	FAMILY NOT NAMED	none	none	none	none	none
Solyc00g168200.1	0	1	0	0	0	0	0	0	0	0	0	0	0	0	0	0	0	Unknown Protein (AHRD V1)	#N/A	#N/A	#N/A	#N/A	#N/A	#N/A
Solyc00g170200.1	-1	-1	0	0	0	0	0	0	-1	0	0	0	0	0	0	0	0	Hydrolase alpha/beta fold family protein (AHRD V1 ***- D7L528_ARALY)	#N/A	#N/A	#N/A	#N/A	#N/A	#N/A
Solyc00g170210.2	0	0	0	1	0	0	0	-1	0	0	0	0	0	0	0	0	0	Unknown Protein (AHRD V1)	#N/A	#N/A	#N/A	#N/A	#N/A	#N/A
Solyc00g170510.1	1	1	1	0	0	0	-1	0	-1	0	-1	0	-1	0	-1	0	-1	Pectinesterase (AHRD V1 **** B7SIX2_9CONI)%3B contains Interpro domain(s) IPR000070 Pectinesterase%2C catalytic	FAMILY NOT NAMED	hydrolase activityHHGO:0016787;hydrolase activity, acting on ester bondsHHGO:0016788;enzyme inhibitor activityHHGO:0004857;catalytic activityHHGO:0003824;enzyme regulator activityHHGO:0030234	biological regulationHHGO:0065007;regulation of biological processHHGO:0050789;regulation of catalytic activityHHGO:0050790;regulation of molecular functionHHGO:0065009;metabolic processHHGO:0008152	cell partHHGO:0044464	none	none
Solyc00g171810.2	0	0	0	0	0	0	0	0	0	0	0	0	0	0	0	0	0	ATP synthase subunit a (AHRD V1 ***- Q45KQ5_CAPAN)%3B contains Interpro domain(s) IPR000568 ATPase%2C F0 complex%2C subunit A	ATP SYNTHASE SUBUNIT A	none	none	none	none	ATP synthesisHHP02721 ATP synthetase F0HHP02797
Solyc00g172410.1	0	1	0	0	0	0	0	0	0	0	0	0	0	0	0	-1	0	DNA binding protein-like (AHRD V1 *--- Q6Z4I5_ORYSJ)%3B contains Interpro domain(s) IPR012340 Nucleic acid-binding%2C OB-fold	REPLICATION FACTOR A 1, RFA1	nucleic acid bindingHHGO:0003676;single-stranded DNA bindingHHGO:0003697;bindingHHGO:0005488;DNA bindingHHGO:0003677	cell cycleHHGO:0007049;cellular processHHGO:0009987;DNA replicationHHGO:0006260;nucleobase-containing compound metabolic processHHGO:0006139;primary metabolic processHHGO:0044238;DNA metabolic processHHGO:0006259;metabolic processHHGO:0008152	none	DNA binding proteinHHPC00009;nucleic acid bindingHHPC00171	none
Solyc00g175240.1	1	1	0	0	0	0	0	0	0	0	-1	0	0	0	0	0	0	Ulp1 protease family C-terminal catalytic domain containing protein (AHRD V1 *-*- Q60D46_SOLDE)%3B contains Interpro domain(s) IPR003653 Peptidase C48%2C SUMO/Sentrin/Ubl1 ;_Length	#N/A	#N/A	#N/A	#N/A	#N/A	#N/A
Solyc00g179640.1	0	0	0	0	0	0	0	0	0	0	0	0	0	0	0	0	0	Unknown Protein (AHRD V1)	#N/A	#N/A	#N/A	#N/A	#N/A	#N/A
Solyc00g180840.1	1	1	0	0	0	0	0	0	0	0	0	0	0	0	0	0	0	Unknown Protein (AHRD V1)	#N/A	#N/A	#N/A	#N/A	#N/A	#N/A
Solyc00g181240.1	0	0	0	0	0	0	0	0	0	0	0	0	0	0	0	0	0	Unknown Protein (AHRD V1)	#N/A	#N/A	#N/A	#N/A	#N/A	#N/A
Solyc00g181250.2	0	0	0	0	0	0	0	0	0	0	0	0	0	0	0	0	0	Unknown Protein (AHRD V1)	#N/A	#N/A	#N/A	#N/A	#N/A	#N/A
Solyc00g183050.1	0	0	0	0	0	0	0	0	0	0	0	0	0	0	0	0	0	FYVE zinc finger containing protein (AHRD V1 **-- Q6ASX1_ORYSJ)	#N/A	#N/A	#N/A	#N/A	#N/A	#N/A
Solyc00g184350.2	0	0	0	0	0	0	0	0	0	0	0	0	0	0	0	0	0	Genomic DNA chromosome 5 P1 clone MJJ3 (AHRD V1 ***- Q9FFK6_ARATH)	NUCLEOPORIN NUP84-RELATED	transporter activityHHGO:0005215	localizationHHGO:0051179;cellular component biogenesisHHGO:0044085;nucleobase-containing compound transportHHGO:0015931;transportHHGO:0006810;protein transportHHGO:0015031;protein targetingHHGO:0006605;intracellular protein transportHHGO:0006886;cellular processHHGO:0009987;nuclear transportHHGO:0051169;protein localizationHHGO:0008104;RNA localizationHHGO:0006403	cell partHHGO:0044464;nucleusHHGO:0005634;integral to membraneHHGO:0016021;protein complexHHGO:0043234;intracellularHHGO:0005622;macromolecular complexHHGO:0032991;nuclear envelopeHHGO:0005635;membraneHHGO:0016020;organelleHHGO:0043226	transporterHHPC00227	none
Solyc00g188850.2	1	1	0	0	0	0	0	0	0	-1	-1	0	-1	0	0	-1	-1	Glycosyltransferase CAZy family GT90 (Fragment) (AHRD V1 **-- D8R0N7_SELML)%3B contains Interpro domain(s) IPR008539 Protein of unknown function DUF821%2C CAP10-like	KDEL LYS-ASP-GLU-LEU CONTAINING - RELATED	transferase activityHHGO:0016740;transferase activity, transferring glycosyl groupsHHGO:0016757;catalytic activityHHGO:0003824	lipid metabolic processHHGO:0006629;cellular processHHGO:0009987;primary metabolic processHHGO:0044238;metabolic processHHGO:0008152	cell partHHGO:0044464	none	none
Solyc00g196060.2	0	-1	0	0	0	0	0	0	0	0	0	0	0	0	0	0	0	Auxin response factor 6 (AHRD V1 ***- E0AD21_SOLLC)%3B contains Interpro domain(s) IPR010525 Auxin response factor	FAMILY NOT NAMED	none	none	none	none	none
Solyc00g201060.1	0	0	0	0	0	0	0	0	0	0	0	0	0	0	0	0	0	Unknown Protein (AHRD V1)	#N/A	#N/A	#N/A	#N/A	#N/A	#N/A
Solyc00g202560.1	1	1	0	0	0	0	0	1	-1	1	0	0	0	0	0	1	0	Beta-1 3-glucanase (AHRD V1 ***- Q8S2G6_ORYSJ)%3B contains Interpro domain(s) IPR000490 Glycoside hydrolase%2C family 17	FAMILY NOT NAMED	hydrolase activityHHGO:0016787;hydrolase activity, hydrolyzing O-glycosyl compoundsHHGO:0004553;carbohydrate bindingHHGO:0030246;bindingHHGO:0005488;catalytic activityHHGO:0003824	metabolic processHHGO:0008152	cell partHHGO:0044464;membraneHHGO:0016020;plasma membraneHHGO:0005886	none	none
Solyc00g206460.1	0	-1	1	0	0	0	-1	0	-1	0	0	0	0	0	0	1	0	Os06g0220000 protein (Fragment) (AHRD V1 **-- Q0DDJ2_ORYSJ)%3B contains Interpro domain(s) IPR006766 Phosphate-induced protein 1 conserved region	FAMILY NOT NAMED	none	none	none	none	none
Solyc00g209460.1	0	0	0	0	0	0	1	1	1	0	0	0	0	0	0	0	0	GDSL esterase/lipase At1g71691 (AHRD V1 ***- GDL29_ARATH)%3B contains Interpro domain(s) IPR001087 Lipase%2C GDSL ;_Length	#N/A	#N/A	#N/A	#N/A	#N/A	#N/A
Solyc00g209560.1	0	0	0	0	0	0	0	0	0	0	0	0	0	0	0	0	0	Ulp1 protease family C-terminal catalytic domain containing protein (AHRD V1 *-*- Q60D46_SOLDE)	#N/A	#N/A	#N/A	#N/A	#N/A	#N/A
Solyc00g210860.1	0	0	0	0	0	-1	0	0	-1	0	0	0	0	0	0	0	0	Unknown Protein (AHRD V1)	FAMILY NOT NAMED	none	none	none	none	none
Solyc00g212260.1	-1	0	-1	1	1	0	0	-1	1	-1	0	0	0	0	0	-1	0	GH3 family protein (AHRD V1 *-*- B9GQG9_POPTR)%3B contains Interpro domain(s) IPR004993 GH3 auxin-responsive promoter	FAMILY NOT NAMED	none	none	none	none	none
Solyc00g215560.1	0	0	0	0	0	0	0	0	-1	0	0	0	0	0	0	0	0	Unknown Protein (AHRD V1)	#N/A	#N/A	#N/A	#N/A	#N/A	#N/A
Solyc00g217960.1	-1	0	-1	0	0	-1	0	0	0	0	0	0	0	0	0	-1	0	Ring H2 finger protein (AHRD V1 *-*- D9ZHD8_HYPPE)%3B contains Interpro domain(s) IPR018957 Zinc finger%2C C3HC4 RING-type ;_Length	RING FINGER DOMAIN-CONTAINING	none	catabolic processHHGO:0009056;cellular processHHGO:0009987;protein metabolic processHHGO:0019538;primary metabolic processHHGO:0044238;metabolic processHHGO:0008152;proteolysisHHGO:0006508;cellular protein modification processHHGO:0006464	none	ubiquitin-protein ligaseHHPC00234	none
Solyc00g218560.1	-1	0	-1	0	0	0	0	0	0	0	0	0	0	0	0	0	0	Unknown Protein (AHRD V1)	#N/A	#N/A	#N/A	#N/A	#N/A	#N/A
Solyc00g222460.1	0	0	0	0	0	0	-1	-1	0	0	0	0	0	0	0	0	0	Gag-Pol polyprotein (AHRD V1 ***- B8YLY4_MEDTR)	#N/A	#N/A	#N/A	#N/A	#N/A	#N/A
Solyc00g226760.1	-1	-1	-1	1	0	0	0	1	-1	-1	0	-1	0	0	0	-1	0	Steroid sulfotransferase 3 (AHRD V1 **** O82410_BRANA)%3B contains Interpro domain(s) IPR000863 Sulfotransferase	SULFOTRANSFERASE SULT	transferase activityHHGO:0016740;catalytic activityHHGO:0003824	sulfur compound metabolic processHHGO:0006790;metabolic processHHGO:0008152	none	transferaseHHPC00220	none
Solyc00g227860.1	1	0	0	0	0	0	0	0	0	0	0	0	0	0	0	0	0	UDP-glucosyltransferase (AHRD V1 ***- B3VI56_STERE)%3B contains Interpro domain(s) IPR002213 UDP-glucuronosyl/UDP-glucosyltransferase ;_Length	GLUCOSYL_GLUCURONOSYL TRANSFERASES	transferase activityHHGO:0016740;transferase activity, transferring glycosyl groupsHHGO:0016757;catalytic activityHHGO:0003824	metabolic processHHGO:0008152	cell partHHGO:0044464;organelleHHGO:0043226;intracellularHHGO:0005622	none	none
Solyc00g227960.1	-1	0	0	0	0	0	0	0	0	-1	0	0	0	0	0	0	0	Sulfotransferase family protein (AHRD V1 **** D7LQL2_ARALY)%3B contains Interpro domain(s) IPR000863 Sulfotransferase	SULFOTRANSFERASE SULT	transferase activityHHGO:0016740;catalytic activityHHGO:0003824	sulfur compound metabolic processHHGO:0006790;metabolic processHHGO:0008152	none	transferaseHHPC00220	none
Solyc00g229260.1	1	1	0	0	0	0	0	0	0	0	-1	0	-1	0	0	0	0	TdcA1-ORF2 protein (Fragment) (AHRD V1 *--- Q948N9_DAUCA)	#N/A	#N/A	#N/A	#N/A	#N/A	#N/A
Solyc00g230060.1	-1	0	0	0	0	0	0	0	0	0	0	0	0	0	0	0	0	RNase H family protein (AHRD V1 ***- Q0KIQ6_SOLDE)%3B contains Interpro domain(s) IPR012337 Polynucleotidyl transferase%2C ribonuclease H fold ;_Length	FAMILY NOT NAMED	none	none	none	none	none
Solyc00g230070.1	0	-1	0	0	0	0	0	0	0	0	0	0	0	0	0	0	0	Photosystem II CP43 chlorophyll apoprotein (AHRD V1 ***- D1L8N4_BRANA)%3B contains Interpro domain(s) IPR000932 Photosystem antenna protein-like ;_Length	#N/A	#N/A	#N/A	#N/A	#N/A	#N/A
Solyc00g230080.1	0	-1	0	0	0	0	0	0	0	0	0	0	0	0	0	0	0	Photosystem II D2 protein (AHRD V1 ***- D0FXW8_DUNSA)%3B contains Interpro domain(s) IPR000484 Photosynthetic reaction centre%2C L/M ;_Length	FAMILY NOT NAMED	none	none	none	none	none
Solyc00g237680.1	1	1	0	0	0	0	-1	0	-1	0	-1	0	-1	0	0	0	0	Unknown Protein (AHRD V1)	#N/A	#N/A	#N/A	#N/A	#N/A	#N/A
Solyc00g244290.1	0	-1	1	0	0	0	0	0	0	0	0	0	0	0	-1	0	0	NADH dehydrogenase subunit II (Fragment) (AHRD V1 *-*- O79467_SOLTU)	NADH DEHYDROGENASE	oxidoreductase activityHHGO:0016491;catalytic activityHHGO:0003824	respiratory electron transport chainHHGO:0022904;oxidative phosphorylationHHGO:0006119;generation of precursor metabolites and energyHHGO:0006091	none	dehydrogenaseHHPC00092;reductaseHHPC00198;oxidoreductaseHHPC00176	none
Solyc00g244300.1	0	-1	1	0	0	0	0	0	0	0	0	0	0	-1	-1	0	0	Unknown Protein (AHRD V1)	#N/A	#N/A	#N/A	#N/A	#N/A	#N/A
Solyc00g249900.2	0	0	0	0	0	0	0	0	0	0	0	0	0	0	0	0	0	Adaptin N terminal region family protein expressed (AHRD V1 *-*- Q10SS6_ORYSJ)%3B contains Interpro domain(s) IPR002553 Clathrin/coatomer adaptor%2C adaptin-like%2C N-terminal	ADAPTIN, ALPHA_GAMMA_EPSILON	none	vesicle-mediated transportHHGO:0016192;intracellular protein transportHHGO:0006886;receptor-mediated endocytosisHHGO:0006898;protein transportHHGO:0015031;endocytosisHHGO:0006897;transportHHGO:0006810	none	transmembrane receptor regulatory_adaptor proteinHHPC00226	Huntington diseaseHHP00029 alpha-AdaptinHHP00782
Solyc00g254910.1	1	0	0	0	0	0	0	0	0	0	0	0	0	0	0	0	0	Indole-3-acetic acid-amido synthetase GH3.8 (AHRD V1 *--- B6U4E2_MAIZE)%3B contains Interpro domain(s) IPR004993 GH3 auxin-responsive promoter	FAMILY NOT NAMED	none	none	none	none	none
Solyc00g256710.1	0	0	0	0	0	0	-1	0	0	0	0	0	0	0	0	0	0	Unknown Protein (AHRD V1)	#N/A	#N/A	#N/A	#N/A	#N/A	#N/A
Solyc00g257110.2	1	1	0	-1	0	0	0	0	0	0	0	0	0	0	0	0	0	H-ATPase (AHRD V1 **** Q8L6I3_ORYSJ)%3B contains Interpro domain(s) IPR006534 ATPase%2C P-type%2C plasma-membrane proton-efflux	#N/A	#N/A	#N/A	#N/A	#N/A	#N/A
Solyc00g265110.2	0	1	0	0	0	0	0	0	0	0	0	0	0	0	0	0	0	RNA-binding protein Nova-1 (Fragment) (AHRD V1 *--- NOVA1_RAT)%3B contains Interpro domain(s) IPR018111 K Homology%2C type 1%2C subgroup	KH DOMAIN CONTAINING RNA BINDING PROTEIN	nucleic acid bindingHHGO:0003676;mRNA bindingHHGO:0003729;protein bindingHHGO:0005515;RNA bindingHHGO:0003723;bindingHHGO:0005488;catalytic activityHHGO:0003824	transcription, DNA-dependentHHGO:0006351;RNA metabolic processHHGO:0016070;transportHHGO:0006810;protein transportHHGO:0015031;mRNA processingHHGO:0006397;intracellular protein transportHHGO:0006886;RNA splicing, via transesterification reactionsHHGO:0000375;cellular processHHGO:0009987;protein metabolic processHHGO:0019538;transcription from RNA polymerase II promoterHHGO:0006366;nucleobase-cont…	ribonucleoprotein complexHHGO:0030529	ribonucleoproteinHHPC00201;mRNA processing factorHHPC00147;RNA binding proteinHHPC00031;mRNA splicing factorHHPC00148;enzyme modulatorHHPC00095;nucleic acid bindingHHPC00171	none
Solyc00g269810.1	1	0	1	0	0	0	0	1	0	0	0	0	0	0	0	1	0	F-box family protein (AHRD V1 *-*- D7LSF9_ARALY)%3B contains Interpro domain(s) IPR001810 Cyclin-like F-box	FAMILY NOT NAMED	none	none	none	none	none
Solyc00g270510.1	-1	-1	0	0	0	0	1	0	0	0	0	0	0	0	0	0	0	Nuclear transcription factor Y subunit B-6 (AHRD V1 *-** B6UH02_MAIZE)%3B contains Interpro domain(s) IPR003957 Transcription factor%2C CBFA/NFYB%2C DNA topoisomerase	CCAAT-BINDING TRANSCRIPTION FACTOR-RELATED	none	none	none	none	none
Solyc00g275310.1	1	0	1	0	0	1	0	1	-1	0	0	0	0	0	0	1	0	Unknown Protein (AHRD V1)%3B contains Interpro domain(s) IPR013101 Leucine-rich repeat 2	FAMILY NOT NAMED	none	none	none	none	none
Solyc00g281110.1	0	0	0	0	-1	0	0	0	0	0	0	0	0	0	0	0	0	Unknown Protein (AHRD V1)	#N/A	#N/A	#N/A	#N/A	#N/A	#N/A
Solyc00g282510.1	1	1	0	0	0	0	0	0	1	0	-1	0	-1	0	0	-1	-1	Phenylalanine ammonia-lyase (AHRD V1 ***- B5LAW0_CAPAN)%3B contains Interpro domain(s) IPR005922 Phenylalanine ammonia-lyase ;_Length	HISTIDINE AMMONIA-LYASE	none	none	none	none	none
Solyc00g308930.1	0	1	0	0	0	0	0	0	0	0	0	0	0	0	0	0	1	Lysine-specific histone demethylase 1 homolog 3 (AHRD V1 ***- LDL3_ARATH)	FAMILY NOT NAMED	nucleic acid bindingHHGO:0003676;methyltransferase activityHHGO:0008168;transferase activityHHGO:0016740;DNA-methyltransferase activityHHGO:0009008;bindingHHGO:0005488;catalytic activityHHGO:0003824;oxidoreductase activityHHGO:0016491	cellular amino acid metabolic processHHGO:0006520;porphyrin-containing compound metabolic processHHGO:0006778;cellular processHHGO:0009987;nucleobase-containing compound metabolic processHHGO:0006139;respiratory electron transport chainHHGO:0022904;generation of precursor metabolites and energyHHGO:0006091;metabolic processHHGO:0008152;primary metabolic processHHGO:0044238	none	oxidaseHHPC00175;DNA binding proteinHHPC00009;transferaseHHPC00220;methyltransferaseHHPC00155;oxidoreductaseHHPC00176;DNA methyltransferaseHHPC00013;nucleic acid bindingHHPC00171	Heme biosynthesisHHP02746 Protoporphyrinogen oxidaseHHP02976
Solyc00g309530.1	0	0	0	0	0	0	0	0	0	0	0	0	0	0	0	0	0	Unknown Protein (AHRD V1)	#N/A	#N/A	#N/A	#N/A	#N/A	#N/A
Solyc00g316030.1	0	1	0	-1	0	0	-1	0	-1	0	0	0	0	0	0	0	0	Mutator-like transposase (AHRD V1 ***- Q9SHU0_ARATH)%3B contains Interpro domain(s) IPR006564 Zinc finger%2C PMZ-type ;_Length	#N/A	#N/A	#N/A	#N/A	#N/A	#N/A
Solyc00g316530.1	-1	0	0	0	0	0	0	0	0	0	0	0	0	0	0	0	0	Unknown Protein (AHRD V1);_Length	#N/A	#N/A	#N/A	#N/A	#N/A	#N/A
Solyc00g316730.1	0	0	0	0	0	0	-1	0	0	0	0	0	0	0	0	0	0	Mutator-like transposase (AHRD V1 ***- Q9SHU0_ARATH)%3B contains Interpro domain(s) IPR006564 Zinc finger%2C PMZ-type ;_Length	#N/A	#N/A	#N/A	#N/A	#N/A	#N/A
Solyc00g318130.1	1	1	1	0	0	0	0	0	0	0	-1	0	-1	0	0	0	0	Paired amphipathic helix protein SIN3 (AHRD V1 *--- B3LJ52_YEAS1)%3B contains Interpro domain(s) IPR003822 Paired amphipathic helix ;_Length	SIN3B-RELATED	RNA polymerase II transcription factor binding transcription factor activityHHGO:0001076;hydrolase activityHHGO:0016787;protein bindingHHGO:0005515;deacetylase activityHHGO:0019213;protein binding transcription factor activityHHGO:0000988;transcription cofactor activityHHGO:0003712;transcription factor binding transcription factor activityHHGO:0000989;bindingHHGO:0005488;catalytic activityHHGO:00…	transcription, DNA-dependentHHGO:0006351;regulation of transcription from RNA polymerase II promoterHHGO:0006357;RNA metabolic processHHGO:0016070;cellular component organizationHHGO:0016043;biosynthetic processHHGO:0009058;cellular processHHGO:0009987;transcription from RNA polymerase II promoterHHGO:0006366;nucleobase-containing compound metabolic processHHGO:0006139;cellular protein modificati…	cell partHHGO:0044464;nucleusHHGO:0005634;protein complexHHGO:0043234;chromosomeHHGO:0005694;intracellularHHGO:0005622;nucleoplasmHHGO:0005654;macromolecular complexHHGO:0032991;organelleHHGO:0043226	DNA binding proteinHHPC00009;deacetylaseHHPC00087;chromatin_chromatin-binding proteinHHPC00077;transcription factorHHPC00218;nucleic acid bindingHHPC00171;hydrolaseHHPC00121	Huntington diseaseHHP00029 Sin3AHHP00771
Solyc00g320430.1	0	0	0	0	0	0	0	0	0	0	0	0	0	0	0	0	0	Unknown Protein (AHRD V1)	#N/A	#N/A	#N/A	#N/A	#N/A	#N/A
Solyc01g005000.2	1	0	1	0	-1	0	-1	-1	0	1	0	0	0	0	0	1	0	Glutamate decarboxylase (AHRD V1 ***- Q1I1D8_CITSI)%3B contains Interpro domain(s) IPR010107 Glutamate decarboxylase	FAMILY NOT NAMED	lyase activityHHGO:0016829;carboxy-lyase activityHHGO:0016831;catalytic activityHHGO:0003824	cellular amino acid metabolic processHHGO:0006520;primary metabolic processHHGO:0044238;metabolic processHHGO:0008152	none	decarboxylaseHHPC00089;lyaseHHPC00144	none
Solyc01g005010.2	0	0	-1	1	0	0	0	0	0	0	0	0	0	0	0	0	0	Protein XRI1 (AHRD V1 *-*- XRI1_ARATH)	FAMILY NOT NAMED	none	none	none	none	none
Solyc01g005020.2	-1	-1	0	0	0	0	0	0	0	0	1	0	1	0	0	0	0	Sodium/hydrogen exchanger Na+ H+ antiporter (AHRD V1 *--* Q8IET0_PLAF7)%3B contains Interpro domain(s) IPR018418 Na+/H+ exchanger%2C isoforms 7/8%2C conserved region	SODIUM_HYDROGEN EXCHANGER	none	none	none	none	none
Solyc01g005030.2	-1	-1	-1	0	0	0	0	0	0	0	0	0	0	0	0	0	0	Serine/threonine-protein kinase 36 (AHRD V1 *-*- STK36_HUMAN)%3B contains Interpro domain(s) IPR004240 Nonaspanin (TM9SF)	TRANSMEMBRANE 9 SUPERFAMILY PROTEIN	transmembrane transporter activityHHGO:0022857;transporter activityHHGO:0005215	intracellular protein transportHHGO:0006886;vesicle-mediated transportHHGO:0016192;phagocytosisHHGO:0006909;protein transportHHGO:0015031;endocytosisHHGO:0006897;transportHHGO:0006810	none	transporterHHPC00227	none
Solyc01g005040.2	0	1	0	0	0	0	1	-1	1	0	0	1	0	0	0	-1	-1	Unknown Protein (AHRD V1)%3B contains Interpro domain(s) IPR006702 Uncharacterised protein family UPF0497%2C trans-membrane plant	FAMILY NOT NAMED	none	none	none	none	none
Solyc01g005050.2	0	1	0	0	0	0	0	0	0	0	0	0	0	0	0	-1	0	Unknown Protein (AHRD V1)	FAMILY NOT NAMED	none	none	none	none	none
Solyc01g005060.2	0	0	0	0	0	0	0	0	0	0	-1	0	-1	0	0	0	0	Zinc finger protein (AHRD V1 *-*- Q764N7_MALDO)%3B contains Interpro domain(s) IPR007087 Zinc finger%2C C2H2-type	SERINE_THREONINE-PROTEIN KINASE RIO	none	none	none	none	none
Solyc01g005080.2	-1	-1	0	0	0	0	0	0	0	0	0	0	0	0	0	0	0	Microtubule-associated protein MAP65-1a (AHRD V1 **** C0J9Z7_ORYNI)%3B contains Interpro domain(s) IPR007145 MAP65/ASE1	PROTEIN REGULATOR OF CYTOKINESIS 1 PRC1-RELATED	cytoskeletal protein bindingHHGO:0008092;microtubule bindingHHGO:0008017;protein bindingHHGO:0005515;structural molecule activityHHGO:0005198;structural constituent of cytoskeletonHHGO:0005200;bindingHHGO:0005488	cell cycleHHGO:0007049;mitosisHHGO:0007067;cellular processHHGO:0009987;cytokinesisHHGO:0000910	cytoskeletonHHGO:0005856;intracellularHHGO:0005622;microtubuleHHGO:0005874	microtubule family cytoskeletal proteinHHPC00157;cytoskeletal proteinHHPC00085;non-motor microtubule binding proteinHHPC00166	none
Solyc01g005100.2	0	0	0	0	0	0	0	0	0	0	0	0	0	0	0	0	0	Prolyl 3-hydroxylase 1 (AHRD V1 *--- P3H1_CHICK)%3B contains Interpro domain(s) IPR006620 Prolyl 4-hydroxylase%2C alpha subunit	LEPRECAN 1	none	cellular processHHGO:0009987	extracellular regionHHGO:0005576	extracellular matrix glycoproteinHHPC00100;extracellular matrix proteinHHPC00102	none
Solyc01g005110.2	0	0	0	0	0	0	0	0	0	0	0	0	0	0	0	0	0	cDNA clone J065210E11 full insert sequence (AHRD V1 **-- B7F922_ORYSJ)%3B contains Interpro domain(s) IPR013174 Dolichol-phosphate mannosyltransferase subunit 3	FAMILY NOT NAMED	transferase activityHHGO:0016740;transferase activity, transferring glycosyl groupsHHGO:0016757;catalytic activityHHGO:0003824	lipid metabolic processHHGO:0006629;protein glycosylationHHGO:0006486;biosynthetic processHHGO:0009058;cellular processHHGO:0009987;protein metabolic processHHGO:0019538;phospholipid metabolic processHHGO:0006644;carbohydrate metabolic processHHGO:0005975;protein lipidationHHGO:0006497;primary metabolic processHHGO:0044238;phosphate-containing compound metabolic processHHGO:0006796;metabolic proc…	cytoplasmHHGO:0005737;cell partHHGO:0044464;protein complexHHGO:0043234;intracellularHHGO:0005622;macromolecular complexHHGO:0032991;nuclear outer membrane-endoplasmic reticulum membrane networkHHGO:0042175;membraneHHGO:0016020;endoplasmic reticulumHHGO:0005783;organelleHHGO:0043226	none	none
Solyc01g005120.2	-1	-1	0	-1	0	-1	0	0	0	0	0	0	0	0	0	0	0	Xyloglucan endotransglucosylase/hydrolase 13 (AHRD V1 **** C0IRH2_ACTDE)%3B contains Interpro domain(s) IPR016455 Xyloglucan endotransglucosylase/hydrolase	FAMILY NOT NAMED	none	none	none	none	none
Solyc01g005130.2	-1	0	0	0	0	0	0	0	0	0	0	0	0	0	0	0	0	Zinc finger protein 7 (AHRD V1 ***- B6U8J3_MAIZE)%3B contains Interpro domain(s) IPR007087 Zinc finger%2C C2H2-type	FAMILY NOT NAMED	none	none	cell partHHGO:0044464;organelleHHGO:0043226;nucleusHHGO:0005634;intracellularHHGO:0005622	none	none
Solyc01g005170.1	0	0	0	0	0	0	0	0	0	0	0	0	0	0	0	0	0	Clathrin assembly protein (AHRD V1 ***- B6TW95_MAIZE)%3B contains Interpro domain(s) IPR011417 ANTH ;_Length	CLATHRIN ASSEMBLY PROTEIN	none	intracellular protein transportHHGO:0006886;vesicle-mediated transportHHGO:0016192;receptor-mediated endocytosisHHGO:0006898;protein transportHHGO:0015031;endocytosisHHGO:0006897;transportHHGO:0006810	cytoplasmHHGO:0005737;vesicle coatHHGO:0030120;intracellularHHGO:0005622	vesicle coat proteinHHPC00235;membrane traffic proteinHHPC00150	none
Solyc01g005180.1	-1	-1	-1	1	1	0	1	0	1	0	0	0	0	0	0	0	0	Unknown Protein (AHRD V1)	FAMILY NOT NAMED	none	none	none	none	none
Solyc01g005190.1	0	0	0	0	0	0	0	0	0	0	0	0	0	0	0	0	0	Zinc finger family protein (AHRD V1 *-*- D7M6E6_ARALY)%3B contains Interpro domain(s) IPR007087 Zinc finger%2C C2H2-type ;_Length	FAMILY NOT NAMED	none	none	cell partHHGO:0044464;organelleHHGO:0043226;nucleusHHGO:0005634;intracellularHHGO:0005622	none	none
Solyc01g005200.1	0	0	0	0	0	0	0	0	0	0	0	0	0	0	0	0	0	Zinc finger family protein (AHRD V1 *-*- D7M6E6_ARALY)%3B contains Interpro domain(s) IPR007087 Zinc finger%2C C2H2-type ;_Length	FAMILY NOT NAMED	none	none	cell partHHGO:0044464;organelleHHGO:0043226;nucleusHHGO:0005634;intracellularHHGO:0005622	none	none
Solyc01g005210.2	1	0	0	0	0	0	0	0	0	0	0	0	0	0	0	1	0	Alpha alpha-trehalose-phosphate synthase (UDP-forming) (AHRD V1 **** A3CXN9_METMJ)%3B contains Interpro domain(s) IPR001830 Glycosyl transferase%2C family 20	TREHALOSE-6-PHOSPHATE SYNTHASE	catalytic activityHHGO:0003824	carbohydrate metabolic processHHGO:0005975;primary metabolic processHHGO:0044238;metabolic processHHGO:0008152	none	none	none
Solyc01g005220.2	1	-1	1	1	0	0	-1	0	-1	1	0	0	1	0	0	1	0	Necrotic spotted lesions 1 (Fragment) (AHRD V1 *-*- B6ZA18_HELAN)%3B contains Interpro domain(s) IPR001862 Membrane attack complex component/perforin/complement C9	FAMILY NOT NAMED	none	none	none	none	none
Solyc01g005240.2	1	0	0	0	0	0	0	0	0	0	0	0	0	0	0	0	0	Aspartokinase (AHRD V1 ***- B9RGY9_RICCO)%3B contains Interpro domain(s) IPR001341 Aspartate kinase region	ASPARTATE KINASE	transferase activityHHGO:0016740;amino acid kinase activityHHGO:0019202;catalytic activityHHGO:0003824;kinase activityHHGO:0016301	cellular amino acid metabolic processHHGO:0006520;primary metabolic processHHGO:0044238;metabolic processHHGO:0008152;cellular amino acid biosynthetic processHHGO:0008652	none	amino acid kinaseHHPC00045;transferaseHHPC00220;kinaseHHPC00137	Lysine biosynthesisHHP02751 AspartokinaseHHP03009;Threonine biosynthesisHHP02781 Aspartate kinaseHHP03189
Solyc01g005250.2	0	0	0	0	0	0	0	0	0	0	0	0	0	0	0	0	0	Aspartate-semialdehyde dehydrogenase (AHRD V1 ***- B6TWW1_MAIZE)%3B contains Interpro domain(s) IPR005986 Aspartate-semialdehyde dehydrogenase%2C bacterial	RETINALDEHYDE BINDING PROTEIN-RELATED	none	none	none	none	Threonine biosynthesisHHP02781 Aspartate semialdehyde dehydrogenaseHHP03192;Lysine biosynthesisHHP02751 Aspartate semialdehyde dehydrogenaseHHP03013
Solyc01g005260.2	0	0	0	0	0	0	0	0	0	0	0	0	0	0	0	0	0	SEC14 cytosolic factor family protein (AHRD V1 **-- D7M8H6_ARALY)%3B contains Interpro domain(s) IPR001251 Cellular retinaldehyde-binding/triple function%2C C-terminal	RETINALDEHYDE BINDING PROTEIN-RELATED	oxidoreductase activityHHGO:0016491;catalytic activityHHGO:0003824	cellular amino acid metabolic processHHGO:0006520;primary metabolic processHHGO:0044238;regulation of cellular amino acid metabolic processHHGO:0006521;metabolic processHHGO:0008152	none	dehydrogenaseHHPC00092;oxidoreductaseHHPC00176	Threonine biosynthesisHHP02781 Aspartate semialdehyde dehydrogenaseHHP03192;Lysine biosynthesisHHP02751 Aspartate semialdehyde dehydrogenaseHHP03013
Solyc01g005270.2	0	0	0	-1	0	0	0	0	0	0	0	0	0	0	0	0	0	SEC14 cytosolic factor family protein (AHRD V1 **-- D7M8H6_ARALY)%3B contains Interpro domain(s) IPR001251 Cellular retinaldehyde-binding/triple function%2C C-terminal	RETINALDEHYDE BINDING PROTEIN-RELATED	oxidoreductase activityHHGO:0016491;catalytic activityHHGO:0003824	cellular amino acid metabolic processHHGO:0006520;primary metabolic processHHGO:0044238;regulation of cellular amino acid metabolic processHHGO:0006521;metabolic processHHGO:0008152	none	dehydrogenaseHHPC00092;oxidoreductaseHHPC00176	Threonine biosynthesisHHP02781 Aspartate semialdehyde dehydrogenaseHHP03192;Lysine biosynthesisHHP02751 Aspartate semialdehyde dehydrogenaseHHP03013
Solyc01g005280.2	-1	-1	0	0	0	0	0	0	0	0	0	0	0	0	0	0	0	SEC14 cytosolic factor (AHRD V1 **-- B2W8N2_PYRTR)%3B contains Interpro domain(s) IPR001251 Cellular retinaldehyde-binding/triple function%2C C-terminal	RETINALDEHYDE BINDING PROTEIN-RELATED	oxidoreductase activityHHGO:0016491;catalytic activityHHGO:0003824	cellular amino acid metabolic processHHGO:0006520;primary metabolic processHHGO:0044238;regulation of cellular amino acid metabolic processHHGO:0006521;metabolic processHHGO:0008152	none	dehydrogenaseHHPC00092;oxidoreductaseHHPC00176	Threonine biosynthesisHHP02781 Aspartate semialdehyde dehydrogenaseHHP03192;Lysine biosynthesisHHP02751 Aspartate semialdehyde dehydrogenaseHHP03013
Solyc01g005300.2	0	-1	1	0	0	0	0	1	0	0	0	0	0	0	0	1	0	Flavin-binding kelch domain F box protein (AHRD V1 **-* D7KVS5_ARALY)%3B contains Interpro domain(s) IPR015915 Kelch-type beta propeller	KELCH REPEAT DOMAIN	none	none	none	none	none
Solyc01g005310.2	1	1	0	0	0	0	0	0	0	0	0	0	0	0	0	0	0	Dynamin like protein (AHRD V1 ***- D3BTL7_POLPA)%3B contains Interpro domain(s) IPR001401 Dynamin%2C GTPase region	DYNAMIN	GTPase activityHHGO:0003924;hydrolase activityHHGO:0016787;protein bindingHHGO:0005515;structural molecule activityHHGO:0005198;structural constituent of cytoskeletonHHGO:0005200;bindingHHGO:0005488;catalytic activityHHGO:0003824	transportHHGO:0006810;protein transportHHGO:0015031;endocytosisHHGO:0006897;developmental processHHGO:0032502;vesicle-mediated transportHHGO:0016192;intracellular protein transportHHGO:0006886;cellular component organizationHHGO:0016043;cellular processHHGO:0009987;cellular component morphogenesisHHGO:0032989	cytoskeletonHHGO:0005856;intracellularHHGO:0005622;microtubuleHHGO:0005874	small GTPaseHHPC00208;microtubule family cytoskeletal proteinHHPC00157;G-proteinHHPC00020;cytoskeletal proteinHHPC00085;enzyme modulatorHHPC00095;hydrolaseHHPC00121	none
Solyc01g005320.2	0	0	0	0	0	0	0	0	0	0	0	0	0	0	0	0	0	Conserved membrane protein (AHRD V1 **-- D5ZCG4_MYCTU)%3B contains Interpro domain(s) IPR010721 Protein of unknown function DUF1295	FAMILY NOT NAMED	none	none	none	none	none
Solyc01g005330.2	-1	-1	0	0	0	0	0	0	0	0	0	0	0	0	0	0	0	microtubule associated protein Type 1 (AHRD V1 **-* Q9C9X0_ARATH)%3B contains Interpro domain(s) IPR009768 Myosin II heavy chain-like	FAMILY NOT NAMED	none	none	none	none	none
Solyc01g005340.2	0	0	0	0	0	0	0	0	1	0	0	0	0	0	0	0	0	Ankyrin repeat family protein (AHRD V1 **-- Q9LVG7_ARATH)%3B contains Interpro domain(s) IPR002110 Ankyrin	FAMILY NOT NAMED	none	none	none	none	none
Solyc01g005370.2	-1	0	0	0	0	0	0	0	0	0	0	0	0	0	0	-1	0	Calmodulin-2 (AHRD V1 ***- D7LFI7_ARALY)%3B contains Interpro domain(s) IPR011992 EF-Hand type	EF-HAND CALCIUM-BINDING DOMAIN CONTAINING PROTEIN	calcium ion bindingHHGO:0005509;bindingHHGO:0005488	none	none	intracellular calcium-sensing proteinHHPC00131;calmodulinHHPC00061;signaling moleculeHHPC00207;calcium-binding proteinHHPC00060;enzyme modulatorHHPC00095	none
Solyc01g005380.2	0	0	0	0	0	0	0	0	0	0	0	0	0	0	0	0	0	SET domain containing protein (AHRD V1 ***- B6U0H4_MAIZE)%3B contains Interpro domain(s) IPR001214 SET	UNCHARACTERIZED PUTATIVE METHYLTRANSFERASE	methyltransferase activityHHGO:0008168;transferase activityHHGO:0016740;catalytic activityHHGO:0003824	protein methylationHHGO:0006479;cellular processHHGO:0009987;protein metabolic processHHGO:0019538;primary metabolic processHHGO:0044238;cellular protein modification processHHGO:0006464;metabolic processHHGO:0008152	none	none	none
Solyc01g005390.2	0	0	0	0	0	0	0	0	0	0	0	0	0	0	0	0	0	Nudix hydrolase 4 (AHRD V1 ***- B6T5N7_MAIZE)%3B contains Interpro domain(s) IPR000086 NUDIX hydrolase domain	DIPHOSPHOINOSITOL POLYPHOSPHATE PHOSPHOHYDROLASE	none	lipid metabolic processHHGO:0006629;phospholipid metabolic processHHGO:0006644;primary metabolic processHHGO:0044238;metabolic processHHGO:0008152	none	hydrolaseHHPC00121;phosphataseHHPC00181	none
Solyc01g005400.2	-1	-1	0	0	-1	0	0	0	0	0	0	0	0	0	0	0	0	Calcium binding protein Caleosin (AHRD V1 **-* A8N0P5_COPC7)%3B contains Interpro domain(s) IPR007736 Caleosin related	FAMILY NOT NAMED	none	none	none	none	none
Solyc01g005410.2	1	0	0	0	0	0	0	0	0	0	0	0	0	0	0	0	0	Calcium binding protein Caleosin (AHRD V1 **-* A8N0P5_COPC7)%3B contains Interpro domain(s) IPR007736 Caleosin related	FAMILY NOT NAMED	none	none	none	none	none
Solyc01g005430.2	0	-1	0	0	0	0	0	0	0	0	0	0	0	0	0	1	0	UBX domain protein 6 (AHRD V1 ***- Q7SXA8_DANRE)%3B contains Interpro domain(s) IPR018997 PUB domain	UBX-RELATED	none	none	none	none	none
Solyc01g005440.2	0	-1	0	0	0	0	0	0	-1	0	0	0	0	0	0	1	0	Jasmonate ZIM-domain protein 3 (AHRD V1 **-- B2XVS2_SOLLC)%3B contains Interpro domain(s) IPR010399 Tify	FAMILY NOT NAMED	protein bindingHHGO:0005515;protein binding transcription factor activityHHGO:0000988;transcription factor binding transcription factor activityHHGO:0000989;bindingHHGO:0005488;transcription cofactor activityHHGO:0003712	regulation of biological processHHGO:0050789;response to stimulusHHGO:0050896;response to endogenous stimulusHHGO:0009719;signal transductionHHGO:0007165;response to stressHHGO:0006950;RNA metabolic processHHGO:0016070;nitrogen compound metabolic processHHGO:0006807;regulation of nucleobase-containing compound metabolic processHHGO:0019219;biological regulationHHGO:0065007;cell communicationHHGO:…	cell partHHGO:0044464;organelleHHGO:0043226;nucleusHHGO:0005634;intracellularHHGO:0005622	none	none
Solyc01g005470.2	0	1	0	0	0	0	0	0	0	0	0	0	0	0	0	-1	0	Cell number regulator 10 (AHRD V1 **-- D9HP26_MAIZE)%3B contains Interpro domain(s) IPR006461 Protein of unknown function Cys-rich	FAMILY NOT NAMED	none	none	none	none	none
Solyc01g005480.2	-1	0	0	0	0	0	0	0	1	0	0	0	0	0	0	0	0	Unknown Protein (AHRD V1)%3B contains Interpro domain(s) IPR007749 Protein of unknown function DUF677	FAMILY NOT NAMED	none	none	none	none	none
Solyc01g005490.2	-1	0	0	0	0	0	1	0	1	0	0	0	0	0	0	-1	0	Iaa-amino acid hydrolase 4 (AHRD V1 ***- B9IIQ5_POPTR)%3B contains Interpro domain(s) IPR017439 Peptidase M20D%2C mername-AA028/carboxypeptidase Ss1	#N/A	#N/A	#N/A	#N/A	#N/A	#N/A
Solyc01g005510.2	0	0	0	0	0	0	0	0	0	0	0	0	0	0	0	0	0	Laccase-2 (AHRD V1 **-- LAC2_ORYSJ)%3B contains Interpro domain(s) IPR011707 Multicopper oxidase%2C type 3	MULTI-COPPER OXIDASE	oxidoreductase activityHHGO:0016491;bindingHHGO:0005488;catalytic activityHHGO:0003824	metabolic processHHGO:0008152	cell junctionHHGO:0030054;cell partHHGO:0044464;external encapsulating structureHHGO:0030312;cell wallHHGO:0005618	oxidaseHHPC00175;oxidoreductaseHHPC00176;ligaseHHPC00142	none
Solyc01g005520.2	0	0	0	0	0	0	0	0	0	0	0	0	0	0	0	0	0	Tetratricopeptide TPR_2 repeat protein (AHRD V1 *--- A8ZVN6_DESOH)%3B contains Interpro domain(s) IPR001478 PDZ/DHR/GLGF	MITOCHONDRIAL OUTER MEMBRANE PROTEIN 25	none	none	none	none	none
Solyc01g005530.2	0	0	0	0	0	0	0	0	0	0	0	0	0	0	0	0	0	Genomic DNA chromosome 3 P1 clone MRP15 (AHRD V1 ***- Q9LJE3_ARATH)	FAMILY NOT NAMED	none	none	none	none	none
Solyc01g005540.2	0	0	0	0	0	0	0	0	0	0	0	0	0	0	0	0	0	Lysyl-tRNA synthetase (AHRD V1 ***- B9SBP3_RICCO)%3B contains Interpro domain(s) IPR002313 Lysyl-tRNA synthetase%2C class II	FAMILY NOT NAMED	ligase activityHHGO:0016874;nucleic acid bindingHHGO:0003676;RNA bindingHHGO:0003723;aminoacyl-tRNA ligase activityHHGO:0004812;bindingHHGO:0005488;catalytic activityHHGO:0003824	tRNA aminoacylation for protein translationHHGO:0006418;protein metabolic processHHGO:0019538;primary metabolic processHHGO:0044238;translationHHGO:0006412;metabolic processHHGO:0008152	none	aminoacyl-tRNA synthetaseHHPC00047;RNA binding proteinHHPC00031;ligaseHHPC00142;nucleic acid bindingHHPC00171	none
Solyc01g005550.2	0	-1	-1	0	0	0	0	0	0	0	0	0	0	0	0	1	0	Carboxyl-terminal peptidase (AHRD V1 ***- B6U8T6_MAIZE)%3B contains Interpro domain(s) IPR004314 Protein of unknown function DUF239%2C plant	FAMILY NOT NAMED	none	none	none	none	none
Solyc01g005560.2	0	0	0	0	0	0	0	0	0	0	0	0	0	0	0	0	0	Isocitrate dehydrogenase (AHRD V1 ***- D2D324_GOSHI)%3B contains Interpro domain(s) IPR004790 Isocitrate dehydrogenase NADP-dependent%2C eukaryotic	NADP-SPECIFIC ISOCITRATE DEHYDROGENASE	none	none	none	none	none
Solyc01g005570.2	0	-1	0	0	0	0	0	0	0	0	0	0	0	0	0	0	0	Unknown Protein (AHRD V1)%3B contains Interpro domain(s) IPR012438 Protein of unknown function DUF1639	FAMILY NOT NAMED	none	none	none	none	none
Solyc01g005580.2	0	0	0	0	0	0	0	0	0	0	0	0	0	0	0	0	0	Unknown Protein (AHRD V1)%3B contains Interpro domain(s) IPR012438 Protein of unknown function DUF1639	FAMILY NOT NAMED	none	none	none	none	none
Solyc01g005590.2	0	-1	1	-1	0	0	0	0	0	0	0	0	1	0	-1	0	0	Unknown Protein (AHRD V1)	FAMILY NOT NAMED	none	none	none	none	none
Solyc01g005600.2	0	-1	0	0	0	0	0	0	0	0	0	0	0	0	0	0	0	Adenosine 5%26apos-phosphosulfate reductase 8 (AHRD V1 ***- Q5EUC2_MAIZE)%3B contains Interpro domain(s) IPR017936 Thioredoxin-like	PROTEIN DISULFIDE ISOMERASE	isomerase activityHHGO:0016853;protein disulfide isomerase activityHHGO:0003756;catalytic activityHHGO:0003824	response to stimulusHHGO:0050896;response to stressHHGO:0006950;cellular processHHGO:0009987;protein metabolic processHHGO:0019538;protein foldingHHGO:0006457;primary metabolic processHHGO:0044238;metabolic processHHGO:0008152	none	none	none
Solyc01g005620.2	0	0	0	0	0	0	0	0	0	0	0	0	0	0	0	0	0	Mitochondrial 2-oxoglutarate/malate carrier protein (AHRD V1 **** Q9FSF4_TOBAC)%3B contains Interpro domain(s) IPR001993 Mitochondrial substrate carrier	FAMILY NOT NAMED	structural constituent of ribosomeHHGO:0003735;structural molecule activityHHGO:0005198	biosynthetic processHHGO:0009058;cellular processHHGO:0009987;protein metabolic processHHGO:0019538;translationHHGO:0006412;metabolic processHHGO:0008152;primary metabolic processHHGO:0044238	none	ribosomal proteinHHPC00202;amino acid transporterHHPC00046;transfer_carrier proteinHHPC00219;transporterHHPC00227;RNA binding proteinHHPC00031;mitochondrial carrier proteinHHPC00158;intracellular calcium-sensing proteinHHPC00131;calmodulinHHPC00061;calcium-binding proteinHHPC00060;nucleic acid bindingHHPC00171	none
Solyc01g005640.2	0	-1	0	0	0	0	0	0	0	0	0	0	0	0	0	0	0	Uncharacterized plant-specific domain TIGR01589 family protein (AHRD V1 *-*- Q60CZ4_SOLDE)%3B contains Interpro domain(s) IPR006476 Conserved hypothetical protein CHP01589%2C plant	FAMILY NOT NAMED	none	none	none	none	none
Solyc01g005650.1	0	0	1	0	-1	-1	0	0	0	0	0	0	0	0	0	0	0	Ariadne-like ubiquitin ligase (AHRD V1 **-* D3AZ84_POLPA)%3B contains Interpro domain(s) IPR002867 Zinc finger%2C C6HC-type	RBR FAMILY RING FINGER AND IBR DOMAIN-CONTAINING	protein bindingHHGO:0005515;bindingHHGO:0005488	regulation of biological processHHGO:0050789;proteolysisHHGO:0006508;biological regulationHHGO:0065007;catabolic processHHGO:0009056;protein metabolic processHHGO:0019538;cellular processHHGO:0009987;primary metabolic processHHGO:0044238;metabolic processHHGO:0008152;cellular protein modification processHHGO:0006464	cytoplasmHHGO:0005737;cell partHHGO:0044464;protein complexHHGO:0043234;intracellularHHGO:0005622;macromolecular complexHHGO:0032991	ubiquitin-protein ligaseHHPC00234;ligaseHHPC00142	none
Solyc01g005660.1	-1	-1	0	0	0	-1	0	0	0	0	1	0	1	0	0	0	0	Myb transcription factor (AHRD V1 **-- Q6Q789_VITVI)%3B contains Interpro domain(s) IPR015495 Myb transcription factor ;_Length	MYB-LIKE DNA-BINDING PROTEIN MYB	nucleic acid bindingHHGO:0003676;sequence-specific DNA binding transcription factor activityHHGO:0003700;bindingHHGO:0005488;DNA bindingHHGO:0003677	transcription, DNA-dependentHHGO:0006351;regulation of transcription from RNA polymerase II promoterHHGO:0006357;RNA metabolic processHHGO:0016070;rRNA metabolic processHHGO:0016072;apoptotic processHHGO:0006915;cellular amino acid biosynthetic processHHGO:0008652;purine nucleobase metabolic processHHGO:0006144;cell cycleHHGO:0007049;cellular amino acid metabolic processHHGO:0006520;cellular proc…	none	DNA binding proteinHHPC00009;transcription factorHHPC00218;nucleic acid bindingHHPC00171	none
Solyc01g005670.2	0	0	0	0	0	0	0	0	0	0	0	0	0	0	0	0	0	Disease resistance protein (AHRD V1 ***- D1GEG2_BRARP)	FAMILY NOT NAMED	none	none	none	none	none
Solyc01g005690.2	-1	0	0	0	0	0	0	0	0	0	0	0	0	0	0	0	0	Unknown Protein (AHRD V1)	FAMILY NOT NAMED	none	none	none	none	none
Solyc01g005700.2	0	0	0	0	0	0	0	0	0	0	0	0	0	0	0	0	0	Mutator-like transposase-like protein (AHRD V1 ***- Q9FI74_ARATH)%3B contains Interpro domain(s) IPR004332 Transposase%2C MuDR%2C plant	FAMILY NOT NAMED	none	mitosisHHGO:0007067	none	none	none
Solyc01g005770.2	1	1	0	0	0	0	1	0	1	0	0	0	0	0	0	0	0	Unknown Protein (AHRD V1)	#N/A	#N/A	#N/A	#N/A	#N/A	#N/A
Solyc01g005790.1	0	0	0	0	0	0	0	0	0	0	0	0	0	0	0	0	0	Pentatricopeptide repeat-containing protein (AHRD V1 ***- D7KKP4_ARALY)%3B contains Interpro domain(s) IPR002885 Pentatricopeptide repeat	FAMILY NOT NAMED	nucleic acid bindingHHGO:0003676;RNA bindingHHGO:0003723;transmembrane transporter activityHHGO:0022857;transferase activityHHGO:0016740;bindingHHGO:0005488;catalytic activityHHGO:0003824;transmembrane receptor protein kinase activityHHGO:0019199;transmembrane receptor protein serine_threonine kinase activityHHGO:0004675;receptor activityHHGO:0004872;transporter activityHHGO:0005215;kinase activi…	intracellular protein transportHHGO:0006886;protein phosphorylationHHGO:0006468;protein metabolic processHHGO:0019538;cellular protein modification processHHGO:0006464;metabolic processHHGO:0008152;transportHHGO:0006810;protein transportHHGO:0015031;primary metabolic processHHGO:0044238	none	protein kinase receptorHHPC00194;protein kinaseHHPC00193;serine_threonine protein kinase receptorHHPC00205;transporterHHPC00227;transferaseHHPC00220;RNA binding proteinHHPC00031;kinaseHHPC00137;receptorHHPC00197;nucleic acid bindingHHPC00171	none
Solyc01g005800.2	0	0	0	0	0	0	0	0	0	0	0	0	0	0	0	0	0	Calmodulin binding protein (AHRD V1 *--* B6U0B7_MAIZE)	FAMILY NOT NAMED	none	none	none	none	none
Solyc01g005810.2	1	1	0	0	0	0	0	0	0	0	0	0	0	0	0	0	0	Mak16 protein (AHRD V1 *-*- Q2HUC0_MEDTR)%3B contains Interpro domain(s) IPR006958 Mak16 protein	MAINTENANCE OF KILLER 16 MAK16 PROTEIN-RELATED	none	cell cycleHHGO:0007049;cellular processHHGO:0009987;protein metabolic processHHGO:0019538;protein complex assemblyHHGO:0006461	none	none	none
Solyc01g005820.2	0	0	0	0	0	0	0	0	0	0	0	0	0	0	0	0	0	Splicing factor arginine/serine-rich 4 (AHRD V1 *--- B6U7F9_MAIZE)%3B contains Interpro domain(s) IPR012677 Nucleotide-binding%2C alpha-beta plait	SERINE_ARGININE RICH SPLICING FACTOR	nucleic acid bindingHHGO:0003676;mRNA bindingHHGO:0003729;RNA bindingHHGO:0003723;bindingHHGO:0005488;catalytic activityHHGO:0003824	mRNA processingHHGO:0006397;RNA splicing, via transesterification reactionsHHGO:0000375;nucleobase-containing compound metabolic processHHGO:0006139;RNA metabolic processHHGO:0016070;mRNA splicing, via spliceosomeHHGO:0000398;metabolic processHHGO:0008152;primary metabolic processHHGO:0044238	none	mRNA processing factorHHPC00147;RNA binding proteinHHPC00031;mRNA splicing factorHHPC00148;nucleic acid bindingHHPC00171	none
Solyc01g005830.2	0	-1	0	0	0	0	0	0	0	0	0	0	0	0	0	1	0	Glucan endo-1 3-beta-glucosidase 4 (AHRD V1 *-*- B6TL03_MAIZE)%3B contains Interpro domain(s) IPR012946 X8	FAMILY NOT NAMED	hydrolase activityHHGO:0016787;hydrolase activity, hydrolyzing O-glycosyl compoundsHHGO:0004553;carbohydrate bindingHHGO:0030246;bindingHHGO:0005488;catalytic activityHHGO:0003824	metabolic processHHGO:0008152	cell partHHGO:0044464;membraneHHGO:0016020;plasma membraneHHGO:0005886	none	none
Solyc01g005840.2	0	0	0	0	0	0	0	0	0	0	0	0	0	0	0	0	0	Ubiquitin-conjugating enzyme E2 E3 (AHRD V1 **** B6T544_MAIZE)%3B contains Interpro domain(s) IPR000608 Ubiquitin-conjugating enzyme%2C E2	FAMILY NOT NAMED	ligase activityHHGO:0016874;catalytic activityHHGO:0003824	protein metabolic processHHGO:0019538;primary metabolic processHHGO:0044238;metabolic processHHGO:0008152;cellular protein modification processHHGO:0006464	none	ligaseHHPC00142	Ubiquitin proteasome pathwayHHP00060 E2HHP01491
Solyc01g005900.2	0	0	0	0	0	0	0	0	0	0	0	0	0	0	0	0	0	Transferase family protein (AHRD V1 **-- D7KCY6_ARALY)%3B contains Interpro domain(s) IPR002293 Amino acid/polyamine transporter I	FAMILY NOT NAMED	none	none	none	none	none
Solyc01g005910.2	0	0	0	0	0	0	0	0	0	0	0	0	0	0	0	0	0	Acid phosphatase/vanadium-dependent haloperoxidase related (AHRD V1 *--- B2A528_NATTJ)%3B contains Interpro domain(s) IPR003832 Acid phosphatase/vanadium-dependent haloperoxidase related	FAMILY NOT NAMED	none	none	none	none	none
Solyc01g005920.2	-1	0	0	0	0	0	0	0	0	-1	0	0	0	0	0	-1	0	Amino acid permease (Fragment) (AHRD V1 ***- B8C3S3_THAPS)%3B contains Interpro domain(s) IPR002293 Amino acid/polyamine transporter I	AMINO ACID TRANSPORTER	transmembrane transporter activityHHGO:0022857;amino acid transmembrane transporter activityHHGO:0015171;transporter activityHHGO:0005215	localizationHHGO:0051179;cellular processHHGO:0009987;amino acid transportHHGO:0006865;anion transportHHGO:0006820;ion transportHHGO:0006811;transportHHGO:0006810	cell partHHGO:0044464;membraneHHGO:0016020;integral to membraneHHGO:0016021;plasma membraneHHGO:0005886	amino acid transporterHHPC00046;transporterHHPC00227	none
Solyc01g005930.2	0	-1	0	0	0	0	0	0	0	0	0	0	0	0	0	0	0	Unknown Protein (AHRD V1)	FAMILY NOT NAMED	none	none	none	none	none
Solyc01g005950.2	0	-1	-1	0	0	0	0	0	0	0	0	0	0	0	0	0	0	Serine/threonine-protein phosphatase (AHRD V1 **** B9GY91_POPTR)%3B contains Interpro domain(s) IPR006186 Serine/threonine-specific protein phosphatase and bis(5-nucleosyl)-tetraphosphatase	SERINE_THREONINE PROTEIN PHOSPHATASE	hydrolase activityHHGO:0016787;hydrolase activity, acting on ester bondsHHGO:0016788;phosphatase activityHHGO:0016791;calcium ion bindingHHGO:0005509;bindingHHGO:0005488;catalytic activityHHGO:0003824;phosphoprotein phosphatase activityHHGO:0004721	transcription, DNA-dependentHHGO:0006351;RNA metabolic processHHGO:0016070;glycogen metabolic processHHGO:0005977;protein phosphorylationHHGO:0006468;cellular processHHGO:0009987;transcription from RNA polymerase II promoterHHGO:0006366;nucleobase-containing compound metabolic processHHGO:0006139;cellular protein modification processHHGO:0006464;primary metabolic processHHGO:0044238;response to s…	none	calcium-binding proteinHHPC00060;protein phosphataseHHPC00195;phosphataseHHPC00181;hydrolaseHHPC00121	FGF signaling pathwayHHP00021 PP2AHHP00629;EGF receptor signaling pathwayHHP00018 PP2AHHP00547
Solyc01g005960.2	0	0	0	0	0	0	0	0	0	0	0	0	0	0	0	0	0	ATP dependent RNA helicase (AHRD V1 ***- B3LKV6_YEAS1)%3B contains Interpro domain(s) IPR011545 DNA/RNA helicase%2C DEAD/DEAH box type%2C N-terminal	RNA HELICASE	pyrophosphatase activityHHGO:0016462;hydrolase activityHHGO:0016787;RNA helicase activityHHGO:0003724;helicase activityHHGO:0004386;catalytic activityHHGO:0003824	catabolic processHHGO:0009056;cellular processHHGO:0009987;nucleobase-containing compound metabolic processHHGO:0006139;RNA metabolic processHHGO:0016070;nitrogen compound metabolic processHHGO:0006807;metabolic processHHGO:0008152;phosphate-containing compound metabolic processHHGO:0006796;primary metabolic processHHGO:0044238	none	helicaseHHPC00115;RNA binding proteinHHPC00031;RNA helicaseHHPC00032;nucleic acid bindingHHPC00171	none
Solyc01g005970.2	1	0	0	0	0	0	0	0	0	0	-1	0	0	0	0	0	0	Kelch-like protein 3 (AHRD V1 *-*- KLHL3_PONAB)%3B contains Interpro domain(s) IPR015915 Kelch-type beta propeller	FAMILY NOT NAMED	ligase activityHHGO:0016874;ubiquitin-protein ligase activityHHGO:0004842;catalytic activityHHGO:0003824	cellular processHHGO:0009987;protein metabolic processHHGO:0019538;primary metabolic processHHGO:0044238;cellular protein modification processHHGO:0006464;metabolic processHHGO:0008152	cell partHHGO:0044464;protein complexHHGO:0043234;macromolecular complexHHGO:0032991;intracellularHHGO:0005622	none	none
Solyc01g005980.2	0	0	0	0	0	0	0	0	0	0	0	0	0	0	0	0	0	POT family domain containing protein expressed (AHRD V1 *-*- D8L9H8_WHEAT)%3B contains Interpro domain(s) IPR007493 Protein of unknown function DUF538	FAMILY NOT NAMED	none	none	none	none	none
Solyc01g006000.2	0	0	0	0	0	0	0	0	0	0	0	0	0	0	0	0	0	GPI mannosyltransferase 2 (AHRD V1 **** A8N6M5_COPC7)%3B contains Interpro domain(s) IPR007315 Mannosyltransferase%2C PIG-V	GPI MANNOSYLTRANSFERASE 2	transferase activityHHGO:0016740;transferase activity, transferring glycosyl groupsHHGO:0016757;catalytic activityHHGO:0003824	lipid metabolic processHHGO:0006629;biosynthetic processHHGO:0009058;cellular processHHGO:0009987;protein metabolic processHHGO:0019538;phospholipid metabolic processHHGO:0006644;protein lipidationHHGO:0006497;primary metabolic processHHGO:0044238;phosphate-containing compound metabolic processHHGO:0006796;metabolic processHHGO:0008152;cellular protein modification processHHGO:0006464	cytoplasmHHGO:0005737;cell partHHGO:0044464;protein complexHHGO:0043234;intracellularHHGO:0005622;macromolecular complexHHGO:0032991;nuclear outer membrane-endoplasmic reticulum membrane networkHHGO:0042175;membraneHHGO:0016020;endoplasmic reticulumHHGO:0005783;organelleHHGO:0043226	none	none
Solyc01g006010.2	0	0	0	0	0	0	0	0	0	0	0	0	0	0	0	0	0	Branchpoint-bridging protein (AHRD V1 *--- C1FYD8_PARBD)	RNA-BINDING PROTEIN RELATED	nucleic acid bindingHHGO:0003676;RNA bindingHHGO:0003723;bindingHHGO:0005488;catalytic activityHHGO:0003824;transcription cofactor activityHHGO:0003712;DNA bindingHHGO:0003677;mRNA bindingHHGO:0003729;sequence-specific DNA binding transcription factor activityHHGO:0003700	mRNA processingHHGO:0006397;RNA splicing, via transesterification reactionsHHGO:0000375;nucleobase-containing compound metabolic processHHGO:0006139;RNA metabolic processHHGO:0016070;mRNA splicing, via spliceosomeHHGO:0000398;metabolic processHHGO:0008152;primary metabolic processHHGO:0044238	none	transcription factorHHPC00218;transcription cofactorHHPC00217;mRNA processing factorHHPC00147;RNA binding proteinHHPC00031;mRNA splicing factorHHPC00148;nucleic acid bindingHHPC00171	none
Solyc01g006020.2	-1	0	0	0	0	0	0	0	0	0	0	0	0	0	0	0	0	At3g32930-like protein (Fragment) (AHRD V1 *-*- B3SKU7_ARAHA)	FAMILY NOT NAMED	none	none	cytoplasmHHGO:0005737;cell partHHGO:0044464;organelleHHGO:0043226;intracellularHHGO:0005622;plastidHHGO:0009536	none	none
Solyc01g006030.2	0	0	0	0	0	0	0	0	0	0	0	0	0	0	0	0	0	E3 ubiquitin-protein ligase bre1 (AHRD V1 *-*- B6K254_SCHJY)%3B contains Interpro domain(s) IPR018957 Zinc finger%2C C3HC4 RING-type	RING FINGER PROTEIN-RELATED	none	none	none	none	none
Solyc01g006040.2	0	0	0	0	0	0	0	0	0	0	0	0	0	0	0	0	0	E3 ubiquitin-protein ligase BRE1-like 2 (AHRD V1 ***- BRE1B_ARATH)	RING FINGER PROTEIN-RELATED	none	none	none	none	none
Solyc01g006080.1	0	0	0	1	0	0	0	0	0	0	-1	0	0	0	0	0	0	Protein involved in mRNA turnover and stability (ISS) (AHRD V1 ***- Q00X49_OSTTA)%3B contains Interpro domain(s) IPR008507 Protein of unknown function DUF789	FAMILY NOT NAMED	none	none	none	none	none
Solyc01g006090.2	0	0	1	0	-1	0	0	0	0	0	0	0	0	0	0	0	0	rRNA processing protein Ebp2 (AHRD V1 **-- B6K460_SCHJY)%3B contains Interpro domain(s) IPR008610 Eukaryotic rRNA processing	RRNA PROCESSING PROTEIN EBNA1-BINDING PROTEIN-RELATED	none	nucleobase-containing compound metabolic processHHGO:0006139;primary metabolic processHHGO:0044238;metabolic processHHGO:0008152	none	none	none
Solyc01g006100.2	0	0	0	0	0	0	0	0	0	0	0	0	0	0	0	0	0	Cytosine-specific methyltransferase (AHRD V1 *-*- B4XTS9_ELAGV)%3B contains Interpro domain(s) IPR001525 C-5 cytosine-specific DNA methylase	CYTOSINE-SPECIFIC METHYLTRANSFERASE	none	none	none	none	none
Solyc01g006110.2	0	0	0	0	0	0	0	0	0	0	0	0	0	0	0	0	0	PP2A regulatory subunit TAP46 (AHRD V1 **-- B6TVR5_MAIZE)%3B contains Interpro domain(s) IPR007304 TAP42-like protein	IMMUNOGLOBULIN-BINDING PROTEIN 1	hydrolase activity, acting on ester bondsHHGO:0016788;phosphatase activityHHGO:0016791;phosphatase regulator activityHHGO:0019208;bindingHHGO:0005488;catalytic activityHHGO:0003824;hydrolase activityHHGO:0016787;protein bindingHHGO:0005515;phosphoprotein phosphatase activityHHGO:0004721;enzyme regulator activityHHGO:0030234	regulation of biological processHHGO:0050789;regulation of phosphate metabolic processHHGO:0019220;regulation of molecular functionHHGO:0065009;biological regulationHHGO:0065007;regulation of catalytic activityHHGO:0050790;cellular processHHGO:0009987;phosphate-containing compound metabolic processHHGO:0006796;metabolic processHHGO:0008152	cytoplasmHHGO:0005737;cell partHHGO:0044464;cytosolHHGO:0005829;intracellularHHGO:0005622	defense_immunity proteinHHPC00090	p53 pathway by glucose deprivationHHP04397 alpha4HHP04646
Solyc01g006120.2	-1	0	0	0	0	0	0	0	0	0	0	0	0	0	0	0	0	Casein kinase-like protein (AHRD V1 ***- Q9LID3_ARATH)%3B contains Interpro domain(s) IPR002290 Serine/threonine protein kinase	CASEIN KINASE-RELATED	transferase activityHHGO:0016740;catalytic activityHHGO:0003824;kinase activityHHGO:0016301;protein kinase activityHHGO:0004672	regulation of biological processHHGO:0050789;anatomical structure morphogenesisHHGO:0009653;developmental processHHGO:0032502;biological regulationHHGO:0065007;cellular component organizationHHGO:0016043;protein phosphorylationHHGO:0006468;cellular processHHGO:0009987;protein metabolic processHHGO:0019538;cellular component morphogenesisHHGO:0032989;cellular protein modification processHHGO:00064…	cytoplasmHHGO:0005737;cell partHHGO:0044464;intracellularHHGO:0005622	non-receptor serine_threonine protein kinaseHHPC00167;protein kinaseHHPC00193;transferaseHHPC00220;kinaseHHPC00137	Wnt signaling pathwayHHP00057 Casein Kinase 1HHP01460;Parkinson diseaseHHP00049 Casein kinase IHHP01242
Solyc01g006130.2	0	0	0	0	0	0	0	0	-1	0	0	0	0	0	0	1	0	Homology to unknown gene (AHRD V1 *-*- Q010T6_OSTTA)%3B contains Interpro domain(s) IPR001305 Heat shock protein DnaJ%2C cysteine-rich region	FAMILY NOT NAMED	none	none	none	none	none
Solyc01g006140.2	0	0	0	0	0	0	1	0	0	0	0	0	0	0	0	0	0	DNA replication factor Cdt1 (AHRD V1 *-*- CDT1_HUMAN)%3B contains Interpro domain(s) IPR014939 DNA replication factor CDT1-like	FAMILY NOT NAMED	none	none	none	none	none
Solyc01g006150.2	1	0	0	1	0	0	0	0	0	0	0	0	0	0	0	1	0	Cation-efflux pump fieF (AHRD V1 ***- FIEF_KLEPN)%3B contains Interpro domain(s) IPR002524 Cation efflux protein	FAMILY NOT NAMED	transmembrane transporter activityHHGO:0022857;transporter activityHHGO:0005215;cation transmembrane transporter activityHHGO:0008324	localizationHHGO:0051179;regulation of biological processHHGO:0050789;response to stimulusHHGO:0050896;ion transportHHGO:0006811;transportHHGO:0006810;biological regulationHHGO:0065007;homeostatic processHHGO:0042592;cation transportHHGO:0006812;cellular processHHGO:0009987	none	transporterHHPC00227	none
Solyc01g006160.2	0	0	0	0	0	0	0	0	0	0	0	0	0	0	0	0	0	Unknown Protein (AHRD V1)	#N/A	#N/A	#N/A	#N/A	#N/A	#N/A
Solyc01g006170.2	1	1	0	1	-1	0	0	0	0	0	0	0	0	0	0	0	0	rRNA processing protein ebna1-binding protein-related (AHRD V1 *--* C4QG91_SCHMA)%3B contains Interpro domain(s) IPR008610 Eukaryotic rRNA processing	RRNA PROCESSING PROTEIN EBNA1-BINDING PROTEIN-RELATED	none	nucleobase-containing compound metabolic processHHGO:0006139;primary metabolic processHHGO:0044238;metabolic processHHGO:0008152	none	none	none
Solyc01g006180.2	0	0	0	0	0	0	0	0	0	0	0	0	0	0	0	0	0	GTP-binding protein-like (AHRD V1 ***- Q69NK1_ORYSJ)	GTP-BINDING PROTEIN-RELATED	GTPase activityHHGO:0003924;pyrophosphatase activityHHGO:0016462;hydrolase activityHHGO:0016787;catalytic activityHHGO:0003824	catabolic processHHGO:0009056;cellular component biogenesisHHGO:0044085;cellular processHHGO:0009987;nucleobase-containing compound metabolic processHHGO:0006139;nitrogen compound metabolic processHHGO:0006807;metabolic processHHGO:0008152;phosphate-containing compound metabolic processHHGO:0006796;primary metabolic processHHGO:0044238	none	G-proteinHHPC00020;signaling moleculeHHPC00207;enzyme modulatorHHPC00095;hydrolaseHHPC00121	none
Solyc01g006190.2	0	0	0	0	0	0	0	0	0	0	0	0	0	0	0	0	0	E3 ubiquitin-protein ligase sina (AHRD V1 **-* B0WR23_CULQU)%3B contains Interpro domain(s) IPR004162 Seven in absentia protein	E3 UBIQUITIN PROTEIN LIGASE SIAH	none	deathHHGO:0016265;proteolysisHHGO:0006508;apoptotic processHHGO:0006915;cell deathHHGO:0008219;catabolic processHHGO:0009056;protein metabolic processHHGO:0019538;cellular processHHGO:0009987;primary metabolic processHHGO:0044238;metabolic processHHGO:0008152;cellular protein modification processHHGO:0006464	cytoplasmHHGO:0005737;cell partHHGO:0044464;organelleHHGO:0043226;nucleusHHGO:0005634;intracellularHHGO:0005622	ubiquitin-protein ligaseHHPC00234;ligaseHHPC00142	Wnt signaling pathwayHHP00057 SIAH-1HHP01433
Solyc01g006200.2	0	0	0	0	0	0	0	0	0	0	0	0	0	0	0	0	0	Unknown Protein (AHRD V1)	#N/A	#N/A	#N/A	#N/A	#N/A	#N/A
Solyc01g006210.2	0	1	0	0	0	0	0	0	0	0	0	0	0	0	0	0	0	Non-structural maintenance of chromosomes element 1 homolog (AHRD V1 ***- B5X8H0_SALSA)%3B contains Interpro domain(s) IPR011513 Nse1 non-SMC component of SMC5-6 complex	NON-SMC ELEMENT 1-RELATED	ligase activityHHGO:0016874;ubiquitin-protein ligase activityHHGO:0004842;catalytic activityHHGO:0003824	DNA repairHHGO:0006281;response to stimulusHHGO:0050896;response to stressHHGO:0006950;nitrogen compound metabolic processHHGO:0006807;cellular processHHGO:0009987;protein metabolic processHHGO:0019538;nucleobase-containing compound metabolic processHHGO:0006139;DNA recombinationHHGO:0006310;cellular protein modification processHHGO:0006464;DNA metabolic processHHGO:0006259;primary metabolic proc…	cell partHHGO:0044464;organelleHHGO:0043226;nucleusHHGO:0005634;protein complexHHGO:0043234;chromosomeHHGO:0005694;intracellularHHGO:0005622;macromolecular complexHHGO:0032991	none	none
Solyc01g006220.2	0	0	0	0	0	0	0	0	0	0	0	0	0	0	0	0	0	Histone-lysine N-methyltransferase (AHRD V1 *-*- C1G685_PARBD)%3B contains Interpro domain(s) IPR001214 SET	SET DOMAIN PROTEINS	none	none	none	DNA binding proteinHHPC00009;transferaseHHPC00220;methyltransferaseHHPC00155;nucleic acid bindingHHPC00171	none
Solyc01g006230.2	-1	0	0	0	0	0	0	0	0	0	0	0	0	0	0	0	0	Cysteine protease (AHRD V1 **** A8NLD6_COPC7)%3B contains Interpro domain(s) IPR005078 Peptidase C54	APG4 AUTOPHAGY 4-RELATED	cysteine-type peptidase activityHHGO:0008234;hydrolase activityHHGO:0016787;peptidase activityHHGO:0008233;catalytic activityHHGO:0003824	cellular component biogenesisHHGO:0044085;transportHHGO:0006810;protein targetingHHGO:0006605;cell communicationHHGO:0007154;cellular component organizationHHGO:0016043;biosynthetic processHHGO:0009058;cellular processHHGO:0009987;protein localizationHHGO:0008104;cellular protein modification processHHGO:0006464;primary metabolic processHHGO:0044238;localizationHHGO:0051179;response to stimulusHH…	cytoplasmHHGO:0005737;cell partHHGO:0044464;cytosolHHGO:0005829;intracellularHHGO:0005622	hydrolaseHHPC00121	none
Solyc01g006250.1	-1	0	0	0	0	0	0	0	0	0	0	0	0	0	0	0	0	Unknown Protein (AHRD V1)%3B contains Interpro domain(s) IPR001810 Cyclin-like F-box	#N/A	#N/A	#N/A	#N/A	#N/A	#N/A
Solyc01g006260.2	0	0	0	0	0	0	0	0	0	0	0	0	0	0	0	0	0	Ribonuclease P/MRP protein subunit POP5 (AHRD V1 **** POP5_HUMAN)%3B contains Interpro domain(s) IPR002759 Ribonuclease P-related	OCTANOYLTRANSFERASE	none	cellular processHHGO:0009987;protein metabolic processHHGO:0019538;primary metabolic processHHGO:0044238;metabolic processHHGO:0008152;cellular protein modification processHHGO:0006464	none	none	none
Solyc01g006280.2	0	0	0	0	0	0	1	0	1	0	0	0	0	0	0	0	0	Formate-tetrahydrofolate ligase (AHRD V1 ***- D0MR27_PHYIN)%3B contains Interpro domain(s) IPR000559 Formate-tetrahydrofolate ligase%2C FTHFS	FAMILY NOT NAMED	none	none	none	none	Formyltetrahydroformate biosynthesisHHP02743 Methylene tetrahydrofolate dehydrogenaseHHP02952
Solyc01g006320.2	0	0	0	0	0	0	0	0	0	0	0	0	0	0	0	0	0	Non-race specific disease resistance protein 1-like protein b (AHRD V1 ***- D2CFI3_COFAR)%3B contains Interpro domain(s) IPR010847 Harpin-induced 1	FAMILY NOT NAMED	signal transducer activityHHGO:0004871	biological regulationHHGO:0065007;regulation of biological processHHGO:0050789;response to stimulusHHGO:0050896;cell communicationHHGO:0007154;signal transductionHHGO:0007165;response to stressHHGO:0006950;cellular processHHGO:0009987	cell junctionHHGO:0030054;cell partHHGO:0044464;membraneHHGO:0016020;plasma membraneHHGO:0005886	none	none
Solyc01g006340.2	-1	0	0	0	0	0	0	0	0	0	0	0	0	0	0	0	0	ATP dependent RNA helicase (AHRD V1 ***- B3LKV6_YEAS1)%3B contains Interpro domain(s) IPR011545 DNA/RNA helicase%2C DEAD/DEAH box type%2C N-terminal	RNA HELICASE	pyrophosphatase activityHHGO:0016462;hydrolase activityHHGO:0016787;RNA helicase activityHHGO:0003724;helicase activityHHGO:0004386;catalytic activityHHGO:0003824	catabolic processHHGO:0009056;cellular processHHGO:0009987;nucleobase-containing compound metabolic processHHGO:0006139;RNA metabolic processHHGO:0016070;nitrogen compound metabolic processHHGO:0006807;metabolic processHHGO:0008152;phosphate-containing compound metabolic processHHGO:0006796;primary metabolic processHHGO:0044238	none	helicaseHHPC00115;RNA binding proteinHHPC00031;RNA helicaseHHPC00032;nucleic acid bindingHHPC00171	none
Solyc01g006350.2	0	0	0	0	0	0	0	0	0	0	0	0	0	0	0	0	0	Glucan synthase like 7 (AHRD V1 ***- D8TE42_SELML)%3B contains Interpro domain(s) IPR003440 Glycosyl transferase%2C family 48	LYST-INTERACTING PROTEIN LIP5 DOPAMINE RESPONSIVE PROTEIN DRG-1	none	none	none	none	none
Solyc01g006360.2	0	0	0	0	0	0	0	0	0	0	0	0	0	0	0	0	0	Glucan synthase like 7 (AHRD V1 ***- D8T771_SELML)	LYST-INTERACTING PROTEIN LIP5 DOPAMINE RESPONSIVE PROTEIN DRG-1	none	none	none	none	none
Solyc01g006370.2	0	0	0	0	0	0	0	0	0	0	0	0	0	0	0	0	0	Glucan synthase like 3 (AHRD V1 ***- D8R8I5_SELML)%3B contains Interpro domain(s) IPR003440 Glycosyl transferase%2C family 48	LYST-INTERACTING PROTEIN LIP5 DOPAMINE RESPONSIVE PROTEIN DRG-1	none	none	none	none	none
Solyc01g006390.2	-1	0	0	0	0	0	0	0	-1	0	0	0	0	0	0	0	0	Cysteine-rich extensin-like protein-4 (AHRD V1 *-*- Q08197_TOBAC)	#N/A	#N/A	#N/A	#N/A	#N/A	#N/A
Solyc01g006400.2	0	0	0	-1	0	0	0	0	0	0	0	0	0	0	0	0	0	Cysteine-rich extensin-like protein-4 (AHRD V1 *-*- Q08197_TOBAC)	#N/A	#N/A	#N/A	#N/A	#N/A	#N/A
Solyc01g006430.2	0	-1	0	0	0	0	0	0	0	0	0	0	0	0	0	0	0	Omega-6 fatty acid desaturase (AHRD V1 **** Q461Q1_HEVBR)%3B contains Interpro domain(s) IPR005804 Fatty acid desaturase%2C type 1	FAMILY NOT NAMED	none	none	none	none	none
Solyc01g006440.1	1	1	0	0	0	0	0	0	0	0	0	0	0	0	0	0	0	Peptide transporter-like protein (AHRD V1 **-* Q9SVS9_ARATH)%3B contains Interpro domain(s) IPR000109 TGF-beta receptor%2C type I/II extracellular region	OLIGOPEPTIDE TRANSPORTER-RELATED	transmembrane transporter activityHHGO:0022857;transporter activityHHGO:0005215	transportHHGO:0006810	none	transporterHHPC00227	none
Solyc01g006450.2	0	0	0	1	0	0	0	0	0	0	0	0	0	0	0	0	0	Enoyl reductase (AHRD V1 ***- P93062_BRANA)%3B contains Interpro domain(s) IPR014358 Enoyl-[acyl-carrier-protein] reductase (NADH)	FAMILY NOT NAMED	oxidoreductase activityHHGO:0016491;catalytic activityHHGO:0003824	lipid metabolic processHHGO:0006629;steroid metabolic processHHGO:0008202;fatty acid metabolic processHHGO:0006631;primary metabolic processHHGO:0044238;metabolic processHHGO:0008152	none	dehydrogenaseHHPC00092;reductaseHHPC00198;oxidoreductaseHHPC00176	none
Solyc01g006470.1	1	1	1	0	0	-1	0	-1	1	0	-1	0	-1	0	0	0	-1	Bromodomain protein (AHRD V1 *-*- B9GYV6_POPTR)%3B contains Interpro domain(s) IPR001487 Bromodomain	FALZ-RELATED BROMODOMAIN-CONTAINING PROTEINS	transferase activity, transferring acyl groupsHHGO:0016746;nucleic acid bindingHHGO:0003676;transferase activityHHGO:0016740;acetyltransferase activityHHGO:0016407;bindingHHGO:0005488;catalytic activityHHGO:0003824;chromatin bindingHHGO:0003682	transcription, DNA-dependentHHGO:0006351;cellular processHHGO:0009987;transcription from RNA polymerase II promoterHHGO:0006366;nucleobase-containing compound metabolic processHHGO:0006139;metabolic processHHGO:0008152;primary metabolic processHHGO:0044238	none	DNA binding proteinHHPC00009;chromatin_chromatin-binding proteinHHPC00077;transferaseHHPC00220;acetyltransferaseHHPC00038;nucleic acid bindingHHPC00171	none
Solyc01g006480.2	0	0	0	0	0	0	0	0	0	0	0	0	0	0	0	0	0	Alpha/beta hydrolase (AHRD V1 ***- Q83AV9_COXBU)	UNCHARACTERIZED	none	none	none	none	none
Solyc01g006490.2	0	0	0	0	0	0	0	0	0	0	0	0	0	0	0	0	0	Protein YdiU (AHRD V1 ***- B5N5F2_SALET)%3B contains Interpro domain(s) IPR003846 Uncharacterised protein family UPF0061	FAMILY NOT NAMED	none	none	none	none	none
Solyc01g006500.2	0	0	0	0	0	0	0	0	0	0	0	0	0	0	0	0	0	Pentatricopeptide repeat-containing protein (AHRD V1 ***- D7MMK8_ARALY)%3B contains Interpro domain(s) IPR002885 Pentatricopeptide repeat	FAMILY NOT NAMED	nucleic acid bindingHHGO:0003676;RNA bindingHHGO:0003723;transmembrane transporter activityHHGO:0022857;transferase activityHHGO:0016740;bindingHHGO:0005488;catalytic activityHHGO:0003824;transmembrane receptor protein kinase activityHHGO:0019199;transmembrane receptor protein serine_threonine kinase activityHHGO:0004675;receptor activityHHGO:0004872;transporter activityHHGO:0005215;kinase activi…	intracellular protein transportHHGO:0006886;protein phosphorylationHHGO:0006468;protein metabolic processHHGO:0019538;cellular protein modification processHHGO:0006464;metabolic processHHGO:0008152;transportHHGO:0006810;protein transportHHGO:0015031;primary metabolic processHHGO:0044238	none	protein kinase receptorHHPC00194;protein kinaseHHPC00193;serine_threonine protein kinase receptorHHPC00205;transporterHHPC00227;transferaseHHPC00220;RNA binding proteinHHPC00031;kinaseHHPC00137;receptorHHPC00197;nucleic acid bindingHHPC00171	none
Solyc01g006510.2	0	0	0	0	0	0	0	0	0	0	0	0	0	0	0	0	0	L-threonine 3-dehydrogenase (AHRD V1 ***- TDH_ANADF)%3B contains Interpro domain(s) IPR002328 Alcohol dehydrogenase%2C zinc-containing%2C conserved site	FAMILY NOT NAMED	oxidoreductase activityHHGO:0016491;catalytic activityHHGO:0003824	carbohydrate metabolic processHHGO:0005975;primary metabolic processHHGO:0044238;metabolic processHHGO:0008152	none	dehydrogenaseHHPC00092;reductaseHHPC00198;oxidoreductaseHHPC00176	none
Solyc01g006520.2	1	1	0	0	0	0	0	0	-1	0	0	0	0	0	0	0	0	Receptor-like protein kinase (AHRD V1 ***- Q39202_ARATH)%3B contains Interpro domain(s) IPR002290 Serine/threonine protein kinase	FAMILY NOT NAMED	transferase activityHHGO:0016740;catalytic activityHHGO:0003824;kinase activityHHGO:0016301;protein kinase activityHHGO:0004672	protein phosphorylationHHGO:0006468;cellular processHHGO:0009987;protein metabolic processHHGO:0019538;phosphate-containing compound metabolic processHHGO:0006796;primary metabolic processHHGO:0044238;cellular protein modification processHHGO:0006464;metabolic processHHGO:0008152	cell partHHGO:0044464;membraneHHGO:0016020;plasma membraneHHGO:0005886	none	none
Solyc01g006540.2	0	0	1	-1	1	0	0	0	0	0	0	0	0	0	0	0	0	Lipoxygenase (AHRD V1 **** Q96573_SOLLC)%3B contains Interpro domain(s) IPR001246 Lipoxygenase%2C plant	LIPOXYGENASE	oxidoreductase activityHHGO:0016491;catalytic activityHHGO:0003824	lipid metabolic processHHGO:0006629;primary metabolic processHHGO:0044238;metabolic processHHGO:0008152	none	oxygenaseHHPC00177;oxidoreductaseHHPC00176	none
Solyc01g006620.2	0	0	0	0	0	0	0	0	0	0	0	0	0	0	0	0	1	Phosphoribosylanthranilate transferase (Fragment) (AHRD V1 *--- Q43085_PEA)%3B contains Interpro domain(s) IPR013583 Phosphoribosyltransferase C-terminal%2C plant	SYNAPTOTAGMIN	none	none	none	none	none
Solyc01g006630.2	0	0	-1	0	0	0	0	0	0	0	0	0	0	0	0	0	0	Oxidoreductase family protein (AHRD V1 ***- D7KZW5_ARALY)%3B contains Interpro domain(s) IPR016040 NAD(P)-binding domain	FAMILY NOT NAMED	oxidoreductase activityHHGO:0016491;catalytic activityHHGO:0003824	metabolic processHHGO:0008152	none	dehydrogenaseHHPC00092;oxidoreductaseHHPC00176	none
Solyc01g006650.1	1	1	0	-1	0	0	0	0	0	0	-1	0	-1	0	0	0	0	Ethylene insensitive 3 class transcription factor (AHRD V1 *-** D5L144_MALDO)%3B contains Interpro domain(s) IPR006957 Ethylene insensitive 3	FAMILY NOT NAMED	none	none	none	none	none
Solyc01g006660.1	0	1	0	0	0	0	1	-1	1	0	0	0	-1	0	0	-1	0	Subtilisin-like serine protease (AHRD V1 **-* Q8LAE1_ARATH)%3B contains Interpro domain(s) IPR015500 Peptidase S8%2C subtilisin-related	PROPROTEIN CONVERTASE SUBTILISIN_KEXIN	none	none	none	none	none
Solyc01g006670.2	0	0	0	0	0	0	0	0	0	0	0	0	0	0	0	0	0	UDP-glucosyltransferase HvUGT5876 (AHRD V1 ***- D3WYW1_HORVD)%3B contains Interpro domain(s) IPR002213 UDP-glucuronosyl/UDP-glucosyltransferase	GLUCOSYL_GLUCURONOSYL TRANSFERASES	transferase activityHHGO:0016740;transferase activity, transferring glycosyl groupsHHGO:0016757;catalytic activityHHGO:0003824	metabolic processHHGO:0008152	cell partHHGO:0044464;organelleHHGO:0043226;intracellularHHGO:0005622	none	none
Solyc01g006680.2	0	0	0	0	0	0	0	0	0	0	0	0	0	0	0	0	0	Transcription factor jumonji jmjC domain protein (AHRD V1 *-** D5NKF9_9BURK)%3B contains Interpro domain(s) IPR003347 Transcription factor jumonji/aspartyl beta-hydroxylase	HYPOXIA-INDUCIBLE FACTOR 1 ALPHA INHIBITOR-RELATED	none	none	none	none	none
Solyc01g006690.2	0	0	0	0	0	0	0	0	0	0	0	0	0	0	0	0	0	Unknown Protein (AHRD V1)	FAMILY NOT NAMED	none	none	none	none	none
Solyc01g006700.2	0	1	0	0	0	0	0	0	0	0	0	0	0	0	0	0	0	Downstream neighbor of SON (AHRD V1 *-*- Q5U2V7_RAT)	DOWNSTREAM NEIGHBOR OF SON	none	none	none	none	none
Solyc01g006710.2	0	0	0	0	0	0	0	0	0	0	0	0	0	0	0	0	0	ATP-dependent RNA helicase A-like protein (AHRD V1 ***- Q9FF84_ARATH)%3B contains Interpro domain(s) IPR011545 DNA/RNA helicase%2C DEAD/DEAH box type%2C N-terminal	ATP-DEPENDENT RNA HELICASE	pyrophosphatase activityHHGO:0016462;hydrolase activityHHGO:0016787;RNA helicase activityHHGO:0003724;helicase activityHHGO:0004386;catalytic activityHHGO:0003824	catabolic processHHGO:0009056;cellular processHHGO:0009987;nucleobase-containing compound metabolic processHHGO:0006139;RNA metabolic processHHGO:0016070;nitrogen compound metabolic processHHGO:0006807;metabolic processHHGO:0008152;phosphate-containing compound metabolic processHHGO:0006796;primary metabolic processHHGO:0044238	cytoplasmHHGO:0005737;cell partHHGO:0044464;intracellularHHGO:0005622	helicaseHHPC00115;RNA binding proteinHHPC00031;RNA helicaseHHPC00032;nucleic acid bindingHHPC00171	none
Solyc01g006730.2	1	1	0	0	0	0	0	0	0	0	-1	0	-1	0	0	0	0	Calcium dependent protein kinase 2 (AHRD V1 **** B9H9N5_POPTR)%3B contains Interpro domain(s) IPR002290 Serine/threonine protein kinase	SERINE_THREONINE-PROTEIN KINASE	protein bindingHHGO:0005515;transferase activityHHGO:0016740;calmodulin bindingHHGO:0005516;bindingHHGO:0005488;catalytic activityHHGO:0003824;kinase activityHHGO:0016301;protein kinase activityHHGO:0004672	regulation of biological processHHGO:0050789;response to stimulusHHGO:0050896;response to endogenous stimulusHHGO:0009719;signal transductionHHGO:0007165;biological regulationHHGO:0065007;cell communicationHHGO:0007154;protein phosphorylationHHGO:0006468;intracellular signal transductionHHGO:0035556;cellular processHHGO:0009987;protein metabolic processHHGO:0019538;cellular protein modification p…	cytoplasmHHGO:0005737;cell partHHGO:0044464;intracellularHHGO:0005622	microtubule family cytoskeletal proteinHHPC00157;non-receptor serine_threonine protein kinaseHHPC00167;protein kinaseHHPC00193;cytoskeletal proteinHHPC00085;transferaseHHPC00220;kinaseHHPC00137;non-motor microtubule binding proteinHHPC00166	none
Solyc01g006740.2	0	0	0	0	0	0	0	0	0	0	0	0	0	0	0	0	0	Sucrose phosphate phosphatase (AHRD V1 ***- Q5J3P0_MALDO)%3B contains Interpro domain(s) IPR012847 Sucrose phosphatase%2C plant and cyanobacteria	GLYCOSYLTRANSFERASE	carbohydrate phosphatase activityHHGO:0019203;hydrolase activity, acting on ester bondsHHGO:0016788;phosphatase activityHHGO:0016791;transferase activityHHGO:0016740;catalytic activityHHGO:0003824;nucleotidyltransferase activityHHGO:0016779;hydrolase activityHHGO:0016787;transferase activity, transferring glycosyl groupsHHGO:0016757	polysaccharide metabolic processHHGO:0005976;carbohydrate metabolic processHHGO:0005975;metabolic processHHGO:0008152;primary metabolic processHHGO:0044238	none	carbohydrate phosphataseHHPC00066;glycosyltransferaseHHPC00111;transferaseHHPC00220;nucleotidyltransferaseHHPC00174;phosphataseHHPC00181;hydrolaseHHPC00121	none
Solyc01g006770.1	-1	-1	-1	1	1	0	0	0	0	-1	0	-1	0	0	0	-1	0	Glycoprotein-N-acetylgalactosamine 3-beta-galactosyltransferase 1 (AHRD V1 *--- C1GLT_HUMAN)%3B contains Interpro domain(s) IPR006740 Protein of unknown function DUF604	FRINGE-RELATED	transferase activityHHGO:0016740;transferase activity, transferring glycosyl groupsHHGO:0016757;catalytic activityHHGO:0003824	none	none	glycosyltransferaseHHPC00111;transferaseHHPC00220	none
Solyc01g006800.2	0	0	0	0	0	0	0	0	0	0	0	0	0	0	0	0	0	Methionine aminopeptidase (AHRD V1 ***- B9ST99_RICCO)%3B contains Interpro domain(s) IPR002468 Peptidase M24A%2C methionine aminopeptidase%2C subfamily 2	PROTEASE FAMILY M24 METHIONYL AMINOPEPTIDASE, AMINOPEPTIDASE P	hydrolase activityHHGO:0016787;nucleic acid bindingHHGO:0003676;metallopeptidase activityHHGO:0008237;sequence-specific DNA binding transcription factor activityHHGO:0003700;peptidase activityHHGO:0008233;bindingHHGO:0005488;catalytic activityHHGO:0003824;DNA bindingHHGO:0003677	protein metabolic processHHGO:0019538;translationHHGO:0006412;proteolysisHHGO:0006508;cellular protein modification processHHGO:0006464;metabolic processHHGO:0008152;primary metabolic processHHGO:0044238	none	transcription factorHHPC00218;metalloproteaseHHPC00153;proteaseHHPC00190;nucleic acid bindingHHPC00171;hydrolaseHHPC00121	none
Solyc01g006810.2	0	0	0	0	0	0	0	0	0	0	0	0	0	0	0	0	0	RING-H2 zinc finger protein (Fragment) (AHRD V1 *-*- A1IW10_9LAMI)%3B contains Interpro domain(s) IPR018957 Zinc finger%2C C3HC4 RING-type	RING ZINC FINGER PROTEIN	none	catabolic processHHGO:0009056;cellular processHHGO:0009987;protein metabolic processHHGO:0019538;primary metabolic processHHGO:0044238;metabolic processHHGO:0008152;proteolysisHHGO:0006508;cellular protein modification processHHGO:0006464	none	none	none
Solyc01g006830.2	0	0	-1	0	0	0	0	0	0	0	0	0	0	0	0	0	0	Os02g0200800 protein (Fragment) (AHRD V1 *-*- Q0E303_ORYSJ)%3B contains Interpro domain(s) IPR009675 Targeting for Xklp2	FAMILY NOT NAMED	none	none	none	none	none
Solyc01g006840.2	1	1	0	0	0	0	1	0	0	0	0	0	-1	0	0	0	0	Calcium dependent protein kinase 26 (AHRD V1 **** B9H9M4_POPTR)%3B contains Interpro domain(s) IPR002290 Serine/threonine protein kinase	SERINE_THREONINE-PROTEIN KINASE	protein bindingHHGO:0005515;transferase activityHHGO:0016740;calmodulin bindingHHGO:0005516;bindingHHGO:0005488;catalytic activityHHGO:0003824;kinase activityHHGO:0016301;protein kinase activityHHGO:0004672	regulation of biological processHHGO:0050789;response to stimulusHHGO:0050896;response to endogenous stimulusHHGO:0009719;signal transductionHHGO:0007165;biological regulationHHGO:0065007;cell communicationHHGO:0007154;protein phosphorylationHHGO:0006468;intracellular signal transductionHHGO:0035556;cellular processHHGO:0009987;protein metabolic processHHGO:0019538;cellular protein modification p…	cytoplasmHHGO:0005737;cell partHHGO:0044464;intracellularHHGO:0005622	microtubule family cytoskeletal proteinHHPC00157;non-receptor serine_threonine protein kinaseHHPC00167;protein kinaseHHPC00193;cytoskeletal proteinHHPC00085;transferaseHHPC00220;kinaseHHPC00137;non-motor microtubule binding proteinHHPC00166	none
Solyc01g006850.1	0	0	0	0	0	0	0	0	0	0	0	0	0	0	0	0	0	Pentatricopeptide repeat-containing protein (AHRD V1 ***- D7LZQ2_ARALY)%3B contains Interpro domain(s) IPR002885 Pentatricopeptide repeat	FAMILY NOT NAMED	nucleic acid bindingHHGO:0003676;RNA bindingHHGO:0003723;transmembrane transporter activityHHGO:0022857;transferase activityHHGO:0016740;bindingHHGO:0005488;catalytic activityHHGO:0003824;transmembrane receptor protein kinase activityHHGO:0019199;transmembrane receptor protein serine_threonine kinase activityHHGO:0004675;receptor activityHHGO:0004872;transporter activityHHGO:0005215;kinase activi…	intracellular protein transportHHGO:0006886;protein phosphorylationHHGO:0006468;protein metabolic processHHGO:0019538;cellular protein modification processHHGO:0006464;metabolic processHHGO:0008152;transportHHGO:0006810;protein transportHHGO:0015031;primary metabolic processHHGO:0044238	none	protein kinase receptorHHPC00194;protein kinaseHHPC00193;serine_threonine protein kinase receptorHHPC00205;transporterHHPC00227;transferaseHHPC00220;RNA binding proteinHHPC00031;kinaseHHPC00137;receptorHHPC00197;nucleic acid bindingHHPC00171	none
Solyc01g006860.2	0	0	0	0	0	0	0	0	0	0	0	0	0	0	0	0	0	Co-chaperone HscB-like protein (AHRD V1 ***- A8IK66_CHLRE)%3B contains Interpro domain(s) IPR001623 Heat shock protein DnaJ%2C N-terminal	FAMILY NOT NAMED	none	none	cytoplasmHHGO:0005737;cell partHHGO:0044464;mitochondrionHHGO:0005739;organelleHHGO:0043226;intracellularHHGO:0005622	none	none
Solyc01g006870.2	0	0	0	0	0	0	0	0	0	0	0	0	0	0	0	0	0	cDNA clone J023119C16 full insert sequence (AHRD V1 *-*- B7F733_ORYSJ)	FAMILY NOT NAMED	none	none	none	none	none
Solyc01g006880.2	0	0	0	0	0	0	0	0	0	0	0	0	0	0	0	0	0	Histone-lysine N-methyltransferase (AHRD V1 *-*- B6JWJ3_SCHJY)%3B contains Interpro domain(s) IPR001214 SET	SET DOMAIN PROTEINS	none	none	none	DNA binding proteinHHPC00009;transferaseHHPC00220;methyltransferaseHHPC00155;nucleic acid bindingHHPC00171	none
Solyc01g006890.2	-1	-1	0	1	0	0	0	0	0	0	1	0	1	0	0	0	0	Genomic DNA chromosome 5 P1 clone MUK11 (AHRD V1 ***- Q9FMC4_ARATH)	FAMILY NOT NAMED	none	none	none	none	none
Solyc01g006900.2	0	0	0	0	0	0	0	0	0	0	0	0	0	0	0	0	0	Phosphatidylglycerol/phosphatidylinositol transfer protein (AHRD V1 -**- C5M4H0_CANTT)%3B contains Interpro domain(s) IPR003172 MD-2-related lipid-recognition	NIEMANN PICK TYPE C2 PROTEIN NPC2-RELATED	none	lipid metabolic processHHGO:0006629;lipid transportHHGO:0006869;primary metabolic processHHGO:0044238;metabolic processHHGO:0008152;transportHHGO:0006810	none	none	none
Solyc01g006920.2	0	0	0	0	0	0	0	0	0	0	0	0	0	0	0	0	0	Pentatricopeptide repeat-containing protein (AHRD V1 ***- D7KZF9_ARALY)%3B contains Interpro domain(s) IPR002885 Pentatricopeptide repeat	FAMILY NOT NAMED	nucleic acid bindingHHGO:0003676;RNA bindingHHGO:0003723;transmembrane transporter activityHHGO:0022857;transferase activityHHGO:0016740;bindingHHGO:0005488;catalytic activityHHGO:0003824;transmembrane receptor protein kinase activityHHGO:0019199;transmembrane receptor protein serine_threonine kinase activityHHGO:0004675;receptor activityHHGO:0004872;transporter activityHHGO:0005215;kinase activi…	intracellular protein transportHHGO:0006886;protein phosphorylationHHGO:0006468;protein metabolic processHHGO:0019538;cellular protein modification processHHGO:0006464;metabolic processHHGO:0008152;transportHHGO:0006810;protein transportHHGO:0015031;primary metabolic processHHGO:0044238	none	protein kinase receptorHHPC00194;protein kinaseHHPC00193;serine_threonine protein kinase receptorHHPC00205;transporterHHPC00227;transferaseHHPC00220;RNA binding proteinHHPC00031;kinaseHHPC00137;receptorHHPC00197;nucleic acid bindingHHPC00171	none
Solyc01g006930.2	0	0	0	0	0	0	1	0	1	0	0	0	0	0	0	0	0	Nuclear transcription factor Y subunit A-2 (AHRD V1 **** B6SM21_MAIZE)%3B contains Interpro domain(s) IPR001289 CCAAT-binding transcription factor%2C subunit B	TRANSCRIPTION FACTOR NF-Y ALPHA-RELATED	nucleic acid bindingHHGO:0003676;sequence-specific DNA binding transcription factor activityHHGO:0003700;bindingHHGO:0005488;DNA bindingHHGO:0003677	response to stimulusHHGO:0050896;regulation of transcription from RNA polymerase II promoterHHGO:0006357;transcription, DNA-dependentHHGO:0006351;response to stressHHGO:0006950;transcription from RNA polymerase II promoterHHGO:0006366;nucleobase-containing compound metabolic processHHGO:0006139;primary metabolic processHHGO:0044238;metabolic processHHGO:0008152	none	transcription factorHHPC00218;nucleic acid bindingHHPC00171	none
Solyc01g006940.2	0	0	0	0	0	0	0	0	0	0	0	0	0	0	0	0	0	Poly(U)-binding-splicing factor PUF60 (AHRD V1 *--* PUF60_BOVIN)%3B contains Interpro domain(s) IPR003954 RNA recognition%2C region 1	RNA BINDING PROTEIN	none	none	none	none	none
Solyc01g006950.2	-1	-1	0	0	0	0	1	0	1	0	0	0	0	0	0	0	0	Syntaxin (AHRD V1 ***- Q6X9V9_HORVD)%3B contains Interpro domain(s) IPR010989 t-SNARE	SYNTAXIN	protein bindingHHGO:0005515;SNAP receptor activityHHGO:0005484;bindingHHGO:0005488	localizationHHGO:0051179;exocytosisHHGO:0006887;organelle organizationHHGO:0006996;transportHHGO:0006810;protein transportHHGO:0015031;vesicle-mediated transportHHGO:0016192;intracellular protein transportHHGO:0006886;cellular component organizationHHGO:0016043;cellular processHHGO:0009987;protein localizationHHGO:0008104	cytoplasmHHGO:0005737;cell partHHGO:0044464;integral to membraneHHGO:0016021;protein complexHHGO:0043234;intracellularHHGO:0005622;macromolecular complexHHGO:0032991;SNARE complexHHGO:0031201;membraneHHGO:0016020;plasma membraneHHGO:0005886	SNARE proteinHHPC00034;membrane traffic proteinHHPC00150	Nicotinic acetylcholine receptor signaling pathwayHHP00044 SNARE ComplexHHP01091;Muscarinic acetylcholine receptor 2 and 4 signaling pathwayHHP00043 SNARE ComplexHHP01079
Solyc01g006960.2	0	0	0	0	0	0	0	0	0	0	0	0	0	0	0	0	0	Transport protein particle subunit trs85-2 (AHRD V1 *--- TR852_SCHPO)	TRANSPORT PROTEIN TRAPP	none	cellular component biogenesisHHGO:0044085;transportHHGO:0006810;protein targetingHHGO:0006605;vesicle-mediated transportHHGO:0016192;cell communicationHHGO:0007154;cellular component organizationHHGO:0016043;cellular processHHGO:0009987;protein localizationHHGO:0008104;primary metabolic processHHGO:0044238;localizationHHGO:0051179;response to stimulusHHGO:0050896;response to external stimulusHHGO…	Golgi apparatusHHGO:0005794;cytoplasmHHGO:0005737;cell partHHGO:0044464;organelleHHGO:0043226;protein complexHHGO:0043234;intracellularHHGO:0005622;macromolecular complexHHGO:0032991	none	none
Solyc01g006970.2	0	0	0	0	0	0	0	0	0	0	0	0	0	0	0	0	0	ATP-dependent RNA helicase A-like protein (AHRD V1 ***- Q9FF84_ARATH)%3B contains Interpro domain(s) IPR007502 Helicase-associated region	ATP-DEPENDENT RNA HELICASE	pyrophosphatase activityHHGO:0016462;hydrolase activityHHGO:0016787;RNA helicase activityHHGO:0003724;helicase activityHHGO:0004386;catalytic activityHHGO:0003824	catabolic processHHGO:0009056;cellular processHHGO:0009987;nucleobase-containing compound metabolic processHHGO:0006139;RNA metabolic processHHGO:0016070;nitrogen compound metabolic processHHGO:0006807;metabolic processHHGO:0008152;phosphate-containing compound metabolic processHHGO:0006796;primary metabolic processHHGO:0044238	cytoplasmHHGO:0005737;cell partHHGO:0044464;mitochondrionHHGO:0005739;organelleHHGO:0043226;intracellularHHGO:0005622	helicaseHHPC00115;RNA binding proteinHHPC00031;RNA helicaseHHPC00032;nucleic acid bindingHHPC00171	none
Solyc01g006980.2	0	0	-1	1	0	1	0	0	0	0	0	0	0	0	0	0	0	Malonyl CoA-acyl carrier protein transacylase containing protein expressed (AHRD V1 ***- Q10MS3_ORYSJ)%3B contains Interpro domain(s) IPR004410 Malonyl CoA-acyl carrier protein transacylase	MALONYL COA-ACYL CARRIER PROTEIN TRANSACYLASE	none	none	none	none	none
Solyc01g006990.2	0	0	0	0	0	0	0	0	0	0	0	0	0	0	0	0	0	F-box family protein (AHRD V1 ***- D7KNJ0_ARALY)%3B contains Interpro domain(s) IPR001810 Cyclin-like F-box	FAMILY NOT NAMED	none	none	none	none	none
Solyc01g007060.2	0	0	0	0	0	0	0	0	0	0	0	0	0	0	0	0	0	At5g63850 (Fragment) (AHRD V1 *-*- Q3YIL4_ARATH)	FAMILY NOT NAMED	none	none	none	none	none
Solyc01g007070.2	0	1	0	-1	0	0	1	0	1	0	0	0	0	0	0	0	0	BEL1-like homeodomain protein 1 (AHRD V1 **-- BLH1_ARATH)%3B contains Interpro domain(s) IPR006563 POX	HOMEOBOX PROTEIN TRANSCRIPTION FACTORS	none	none	none	none	none
Solyc01g007100.2	0	0	0	0	0	0	0	0	0	0	0	0	0	0	0	0	0	Digalactosyldiacylglycerol synthase 1%2C chloroplastic (AHRD V1 ***- DGDG1_LOTJA)%3B contains Interpro domain(s) IPR001296 Glycosyl transferase%2C group 1	GLYCOSYLTRANSFERASE	carbohydrate phosphatase activityHHGO:0019203;hydrolase activity, acting on ester bondsHHGO:0016788;phosphatase activityHHGO:0016791;transferase activityHHGO:0016740;catalytic activityHHGO:0003824;nucleotidyltransferase activityHHGO:0016779;hydrolase activityHHGO:0016787;transferase activity, transferring glycosyl groupsHHGO:0016757	polysaccharide metabolic processHHGO:0005976;carbohydrate metabolic processHHGO:0005975;metabolic processHHGO:0008152;primary metabolic processHHGO:0044238	none	carbohydrate phosphataseHHPC00066;glycosyltransferaseHHPC00111;transferaseHHPC00220;nucleotidyltransferaseHHPC00174;phosphataseHHPC00181;hydrolaseHHPC00121	none
Solyc01g007110.2	-1	-1	0	0	0	0	0	0	0	0	0	0	0	0	0	0	0	NC domain-containing protein (AHRD V1 **-- D7LZP9_ARALY)%3B contains Interpro domain(s) IPR007053 NC	HRAS-LIKE SUPPRESSOR - RELATED	none	none	none	none	none
Solyc01g007120.2	0	0	0	0	0	0	0	0	0	0	0	0	0	0	0	0	0	Serine/threonine protein kinase (AHRD V1 **** Q2U6C8_ASPOR)%3B contains Interpro domain(s) IPR000687 RIO kinase	SERINE_THREONINE-PROTEIN KINASE RIO	none	none	none	none	none
Solyc01g007130.2	0	0	0	0	0	0	0	0	0	0	0	0	0	0	0	0	0	Receptor like kinase%2C RLK	FAMILY NOT NAMED	none	none	none	none	none
Solyc01g007140.2	1	1	0	0	0	0	0	0	0	0	-1	0	0	0	0	0	0	Pre-rRNA-processing protein ipi1 (AHRD V1 *--- B6K6C3_SCHJY)%3B contains Interpro domain(s) IPR016024 Armadillo-type fold	UNCHARACTERIZED	none	none	none	none	none
Solyc01g007150.2	0	0	0	0	0	0	0	0	0	0	0	0	0	0	0	0	0	Coatomer subunit beta-1 (AHRD V1 ***- D7MB61_ARALY)%3B contains Interpro domain(s) IPR016460 Coatomer%2C beta subunit	COATOMER SUBUNIT BETA	none	intracellular protein transportHHGO:0006886;vesicle-mediated transportHHGO:0016192;exocytosisHHGO:0006887;protein transportHHGO:0015031;transportHHGO:0006810	cytoplasmHHGO:0005737;vesicle coatHHGO:0030120;intracellularHHGO:0005622	vesicle coat proteinHHPC00235;membrane traffic proteinHHPC00150	none
Solyc01g007160.2	0	0	0	0	0	0	0	0	0	0	0	0	0	0	0	0	0	N-acetyltransferase ESCO1 (AHRD V1 **-- B6TTW6_MAIZE)%3B contains Interpro domain(s) IPR001126 DNA-repair protein%2C UmuC-like	DNA REPAIR POLYMERASE UMUC _ TRANSFERASE FAMILY MEMBER	none	mitosisHHGO:0007067;chromosome segregationHHGO:0007059	none	none	none
Solyc01g007170.2	0	0	0	0	0	0	0	0	0	-1	-1	0	0	-1	0	0	0	Protein unc-13 homolog C (AHRD V1 *--- UN13C_RAT)%3B contains Interpro domain(s) IPR013583 Phosphoribosyltransferase C-terminal%2C plant	SYNAPTOTAGMIN	none	none	none	none	none
Solyc01g007180.2	0	0	0	0	0	0	0	0	0	0	0	0	0	0	0	0	0	Unknown Protein (AHRD V1)	GAMMA TUBULIN COMPLEX PROTEIN	cytoskeletal protein bindingHHGO:0008092;microtubule bindingHHGO:0008017;protein bindingHHGO:0005515;structural molecule activityHHGO:0005198;structural constituent of cytoskeletonHHGO:0005200;bindingHHGO:0005488	cellular component biogenesisHHGO:0044085;reproductionHHGO:0000003;organelle organizationHHGO:0006996;protein complex assemblyHHGO:0006461;meiosisHHGO:0007126;cell cycleHHGO:0007049;mitosisHHGO:0007067;cytoskeleton organizationHHGO:0007010;cellular component organizationHHGO:0016043;protein complex biogenesisHHGO:0070271;cellular processHHGO:0009987	cytoplasmHHGO:0005737;cell partHHGO:0044464;microtubule organizing centerHHGO:0005815;protein complexHHGO:0043234;intracellularHHGO:0005622;macromolecular complexHHGO:0032991;cytoskeletonHHGO:0005856;organelleHHGO:0043226	microtubule family cytoskeletal proteinHHPC00157;cytoskeletal proteinHHPC00085;non-motor microtubule binding proteinHHPC00166	none
Solyc01g007190.2	-1	-1	0	0	0	0	0	0	0	0	1	0	1	0	0	1	0	Unknown Protein (AHRD V1)	FAMILY NOT NAMED	none	none	none	none	none
Solyc01g007200.2	-1	-1	-1	1	1	0	0	0	0	-1	0	-1	0	0	0	0	0	Unknown Protein (AHRD V1)	#N/A	#N/A	#N/A	#N/A	#N/A	#N/A
Solyc01g007220.2	0	-1	1	-1	0	1	0	1	-1	0	0	0	0	0	0	1	0	NHL1 (Fragment) (AHRD V1 **-- B0LZM3_ARATH)%3B contains Interpro domain(s) IPR010847 Harpin-induced 1	FAMILY NOT NAMED	signal transducer activityHHGO:0004871	biological regulationHHGO:0065007;regulation of biological processHHGO:0050789;response to stimulusHHGO:0050896;cell communicationHHGO:0007154;signal transductionHHGO:0007165;response to stressHHGO:0006950;cellular processHHGO:0009987	cell junctionHHGO:0030054;cell partHHGO:0044464;membraneHHGO:0016020;plasma membraneHHGO:0005886	none	none
Solyc01g007230.2	-1	0	0	0	0	0	0	0	0	0	0	0	0	0	0	0	0	Harpin-induced protein-like (Fragment) (AHRD V1 *--- D2CFH8_COFAR)%3B contains Interpro domain(s) IPR010847 Harpin-induced 1	FAMILY NOT NAMED	signal transducer activityHHGO:0004871	biological regulationHHGO:0065007;regulation of biological processHHGO:0050789;response to stimulusHHGO:0050896;cell communicationHHGO:0007154;signal transductionHHGO:0007165;response to stressHHGO:0006950;cellular processHHGO:0009987	cell junctionHHGO:0030054;cell partHHGO:0044464;membraneHHGO:0016020;plasma membraneHHGO:0005886	none	none
Solyc01g007250.2	0	0	0	0	0	0	0	0	0	0	0	0	0	0	0	0	0	U3 small nucleolar ribonucleoprotein protein IMP4 (AHRD V1 ***- D0N3A6_PHYIN)%3B contains Interpro domain(s) IPR007109 Brix domain	U3 SMALL NUCLEOLAR RIBONUCLEOPROTEIN PROTEIN IMP4	nucleic acid bindingHHGO:0003676;RNA bindingHHGO:0003723;bindingHHGO:0005488	cellular component biogenesisHHGO:0044085;cellular processHHGO:0009987;nucleobase-containing compound metabolic processHHGO:0006139;RNA metabolic processHHGO:0016070;nitrogen compound metabolic processHHGO:0006807;rRNA metabolic processHHGO:0016072;metabolic processHHGO:0008152;primary metabolic processHHGO:0044238	cell partHHGO:0044464;ribonucleoprotein complexHHGO:0030529;nucleusHHGO:0005634;protein complexHHGO:0043234;intracellularHHGO:0005622;macromolecular complexHHGO:0032991;nucleolusHHGO:0005730;organelleHHGO:0043226	ribonucleoproteinHHPC00201;RNA binding proteinHHPC00031;nucleic acid bindingHHPC00171	none
Solyc01g007280.2	0	0	-1	0	0	0	0	0	0	0	0	0	0	0	0	0	0	30S ribosomal protein S4 chloroplastic (AHRD V1 ***- B5MF80_PETIN)%3B contains Interpro domain(s) IPR005709 Ribosomal protein S4%2C bacterial-type	30S 40S RIBOSOMAL PROTEIN	structural constituent of ribosomeHHGO:0003735;nucleic acid bindingHHGO:0003676;RNA bindingHHGO:0003723;structural molecule activityHHGO:0005198;bindingHHGO:0005488	regulation of biological processHHGO:0050789;biological regulationHHGO:0065007;regulation of translationHHGO:0006417;biosynthetic processHHGO:0009058;protein metabolic processHHGO:0019538;cellular processHHGO:0009987;primary metabolic processHHGO:0044238;metabolic processHHGO:0008152;translationHHGO:0006412	cytoplasmHHGO:0005737;cell partHHGO:0044464;organelleHHGO:0043226;ribonucleoprotein complexHHGO:0030529;ribosomeHHGO:0005840;intracellularHHGO:0005622;macromolecular complexHHGO:0032991	ribosomal proteinHHPC00202;RNA binding proteinHHPC00031;nucleic acid bindingHHPC00171	none
Solyc01g007310.2	0	0	0	0	0	0	0	0	0	0	0	0	0	0	0	0	0	NAD(P)H-quinone oxidoreductase subunit 3 (AHRD V1 ***- D3WDC8_BULAR)%3B contains Interpro domain(s) IPR000440 NADH:ubiquinone/plastoquinone oxidoreductase%2C chain 3	NADH-UBIQUINONE OXIDOREDUCTASE CHAIN 3	none	none	none	none	none
Solyc01g007320.2	-1	0	-1	0	0	0	0	0	0	0	0	0	0	0	0	0	0	ATP synthase subunit beta chloroplastic (AHRD V1 ***- Q8MBF8_9SOLA)%3B contains Interpro domain(s) IPR005722 ATPase%2C F1 complex%2C beta subunit	#N/A	#N/A	#N/A	#N/A	#N/A	#N/A
Solyc01g007330.2	-1	0	0	0	0	0	0	0	0	0	0	0	0	0	0	0	0	Ribulose bisphosphate carboxylase large chain (AHRD V1 ***- RBL_SOLLC)%3B contains Interpro domain(s) IPR000685 Ribulose bisphosphate carboxylase%2C large subunit%2C C-terminal	FAMILY NOT NAMED	structural constituent of ribosomeHHGO:0003735;nucleic acid bindingHHGO:0003676;structural molecule activityHHGO:0005198;bindingHHGO:0005488	protein metabolic processHHGO:0019538;primary metabolic processHHGO:0044238;translationHHGO:0006412;metabolic processHHGO:0008152	none	ribosomal proteinHHPC00202;RNA binding proteinHHPC00031;nucleic acid bindingHHPC00171	none
Solyc01g007340.2	0	-1	-1	1	0	0	0	0	0	0	0	0	0	0	1	0	0	Acetyl-coenzyme A carboxylase carboxyl transferase subunit beta (AHRD V1 ***- ACCD_EPIVI)%3B contains Interpro domain(s) IPR000438 Acetyl-CoA carboxylase carboxyl transferase%2C beta subunit	FAMILY NOT NAMED	ligase activityHHGO:0016874;catalytic activityHHGO:0003824	lipid metabolic processHHGO:0006629;fatty acid metabolic processHHGO:0006631;cellular amino acid catabolic processHHGO:0009063;cellular amino acid metabolic processHHGO:0006520;fatty acid biosynthetic processHHGO:0006633;primary metabolic processHHGO:0044238;metabolic processHHGO:0008152	none	ligaseHHPC00142	none
Solyc01g007350.2	0	-1	-1	1	0	0	0	0	0	0	0	0	0	0	1	0	0	Photosystem I reaction center subunit VIII (AHRD V1 *-*- Q3V525_ACOCL)%3B contains Interpro domain(s) IPR001302 Photosystem I reaction centre%2C subunit VIII	#N/A	#N/A	#N/A	#N/A	#N/A	#N/A
Solyc01g007360.2	0	0	0	0	0	0	0	0	0	0	0	0	0	0	0	0	0	Photosystem I assembly protein ycf4 (AHRD V1 ***- Q06R54_9LAMI)%3B contains Interpro domain(s) IPR003359 Photosystem I assembly Ycf4	FAMILY NOT NAMED	none	none	none	none	none
Solyc01g007370.2	0	0	0	0	0	0	0	0	0	0	0	0	0	0	0	0	0	Chloroplast envelope membrane protein A (AHRD V1 ***- D7KRA3_ARALY)%3B contains Interpro domain(s) IPR004282 CemA	FAMILY NOT NAMED	none	none	none	none	none
Solyc01g007410.2	-1	-1	0	0	0	0	0	0	0	0	0	0	0	0	0	0	0	Cytochrome b559 subunit alpha (AHRD V1 *-*- D4PBC8_PHODC)%3B contains Interpro domain(s) IPR006217 Photosystem II protein cytochrome b559%2C alpha subunit	FAMILY NOT NAMED	none	none	none	none	none
Solyc01g007420.2	0	0	0	0	0	0	0	0	0	0	0	0	0	0	0	0	0	Cytochrome b6-f complex subunit 6 (AHRD V1 *-*- Q5K3U2_9MAGN)%3B contains Interpro domain(s) IPR007802 Cytochrome b6/f complex subunit VI	#N/A	#N/A	#N/A	#N/A	#N/A	#N/A
Solyc01g007430.2	0	0	0	0	0	0	0	0	0	0	0	0	0	0	0	0	0	Cytochrome b6-f complex subunit 5 (AHRD V1 ***- B7T2X6_EROTE)%3B contains Interpro domain(s) IPR003683 Cytochrome b6/f complex%2C subunit 5	#N/A	#N/A	#N/A	#N/A	#N/A	#N/A
Solyc01g007460.2	0	-1	0	0	0	0	0	0	0	0	0	0	0	0	0	0	0	30S ribosomal protein S18 chloroplastic (AHRD V1 ***- D3WEG6_HEUSA)%3B contains Interpro domain(s) IPR001648 Ribosomal protein S18	30S RIBOSOMAL PROTEIN S18	structural constituent of ribosomeHHGO:0003735;structural molecule activityHHGO:0005198	biosynthetic processHHGO:0009058;cellular processHHGO:0009987;protein metabolic processHHGO:0019538;primary metabolic processHHGO:0044238;translationHHGO:0006412;metabolic processHHGO:0008152	none	ribosomal proteinHHPC00202;RNA binding proteinHHPC00031;nucleic acid bindingHHPC00171	none
Solyc01g007480.1	0	0	0	0	0	0	0	0	0	0	0	0	0	0	0	0	0	Ribosomal protein S12 (Fragment) (AHRD V1 *-*- B0LN88_LYCCH)	#N/A	#N/A	#N/A	#N/A	#N/A	#N/A
Solyc01g007490.2	0	0	0	0	0	0	0	0	0	0	0	0	0	0	0	0	0	ATP-dependent Clp protease proteolytic subunit (AHRD V1 ***- D3WCC1_NEROL)%3B contains Interpro domain(s) IPR001907 Peptidase S14%2C ClpP	#N/A	#N/A	#N/A	#N/A	#N/A	#N/A
Solyc01g007500.2	0	1	0	1	0	0	0	0	1	0	0	0	0	0	0	0	0	Photosystem II CP47 chlorophyll apoprotein (AHRD V1 ***- D3WBA3_9BORA)%3B contains Interpro domain(s) IPR017486 Photosystem II%2C PsbB	#N/A	#N/A	#N/A	#N/A	#N/A	#N/A
Solyc01g007510.1	1	0	0	1	0	0	0	0	0	0	0	0	0	0	1	1	0	PsbN (AHRD V1 ***- Q7HIW7_ARATH)%3B contains Interpro domain(s) IPR003398 Photosystem II protein PsbN ;_Length	FAMILY NOT NAMED	none	none	none	none	none
Solyc01g007520.2	0	0	0	0	0	0	0	0	0	0	0	0	0	0	0	0	0	Photosystem II reaction center protein H (AHRD V1 ***- C6JT33_9MYRT)%3B contains Interpro domain(s) IPR001056 Photosystem II phosphoprotein PsbH	FAMILY NOT NAMED	none	none	none	none	none
Solyc01g007530.2	0	0	0	0	0	0	0	0	0	0	0	0	0	0	0	0	0	Cytochrome b6 (AHRD V1 ***- B3TN79_BRADI)%3B contains Interpro domain(s) IPR005797 Cytochrome b/b6%2C N-terminal	#N/A	#N/A	#N/A	#N/A	#N/A	#N/A
Solyc01g007540.2	0	0	-1	0	0	0	0	0	0	0	0	0	0	0	0	0	0	Cytochrome b6-f complex subunit 4 (AHRD V1 ***- A1XFY6_NUPAD)%3B contains Interpro domain(s) IPR005870 Cytochrome b6/f complex%2C subunit IV	#N/A	#N/A	#N/A	#N/A	#N/A	#N/A
Solyc01g007550.1	0	0	0	0	0	0	0	0	0	0	0	0	0	0	0	0	0	DNA-directed RNA polymerase subunit alpha (AHRD V1 ***- D3WBC7_9BORA)%3B contains Interpro domain(s) IPR011260 RNA polymerase%2C alpha subunit%2C C-terminal ;_Length	FAMILY NOT NAMED	none	none	none	none	none
Solyc01g007600.2	-1	-1	-1	0	0	0	0	0	0	0	0	0	0	0	0	0	0	50S ribosomal protein L16 chloroplastic (AHRD V1 ***- D3WCG3_NEROL)%3B contains Interpro domain(s) IPR000114 Ribosomal protein L16	#N/A	#N/A	#N/A	#N/A	#N/A	#N/A
Solyc01g007610.2	0	0	-1	0	0	0	0	0	0	0	0	0	0	0	0	0	0	30S ribosomal protein S3 chloroplastic (AHRD V1 ***- D3WBD9_9BORA)%3B contains Interpro domain(s) IPR005704 Ribosomal protein S3%2C bacterial	#N/A	#N/A	#N/A	#N/A	#N/A	#N/A
Solyc01g007630.2	-1	-1	0	1	0	0	0	0	0	0	0	0	0	0	0	0	0	50S ribosomal protein L2 chloroplastic (AHRD V1 ***- A6YA71_9MAGN)%3B contains Interpro domain(s) IPR005880 Ribosomal protein L2%2C bacterial-type	RIBOSOMAL PROTEIN L2	structural constituent of ribosomeHHGO:0003735;structural molecule activityHHGO:0005198	biosynthetic processHHGO:0009058;cellular processHHGO:0009987;protein metabolic processHHGO:0019538;translationHHGO:0006412;metabolic processHHGO:0008152;primary metabolic processHHGO:0044238	cytoplasmHHGO:0005737;cell partHHGO:0044464;ribonucleoprotein complexHHGO:0030529;intracellularHHGO:0005622;macromolecular complexHHGO:0032991;cytosolHHGO:0005829;organelleHHGO:0043226;ribosomeHHGO:0005840	ribosomal proteinHHPC00202;RNA binding proteinHHPC00031;nucleic acid bindingHHPC00171	none
Solyc01g007640.2	-1	-1	0	0	0	0	0	0	0	0	0	0	0	0	0	0	0	Ycf2 (AHRD V1 ***- D2KLP5_OLEEU)%3B contains Interpro domain(s) IPR008543 Chloroplast Ycf2	FAMILY NOT NAMED	none	none	none	none	none
Solyc01g007660.2	0	0	0	0	0	0	0	0	0	0	0	0	0	0	0	0	0	NAD(P)H-quinone oxidoreductase subunit 2 chloroplastic (AHRD V1 ***- D3WB81_9BORA)%3B contains Interpro domain(s) IPR010096 NADH-quinone oxidoreductase%2C chain N	NADH DEHYDROGENASE	oxidoreductase activityHHGO:0016491;catalytic activityHHGO:0003824	respiratory electron transport chainHHGO:0022904;oxidative phosphorylationHHGO:0006119;generation of precursor metabolites and energyHHGO:0006091	none	dehydrogenaseHHPC00092;reductaseHHPC00198;oxidoreductaseHHPC00176	none
Solyc01g007670.2	-1	-1	-1	0	0	0	0	0	0	0	0	0	0	0	0	0	0	30S ribosomal protein S7 chloroplastic (AHRD V1 ***- D3WBE1_9BORA)%3B contains Interpro domain(s) IPR005717 Ribosomal protein S7%2C bacterial-type	RIBOSOMAL PROTEIN S7	structural constituent of ribosomeHHGO:0003735;nucleic acid bindingHHGO:0003676;mRNA bindingHHGO:0003729;RNA bindingHHGO:0003723;structural molecule activityHHGO:0005198;bindingHHGO:0005488	cellular component biogenesisHHGO:0044085;organelle organizationHHGO:0006996;cellular component organizationHHGO:0016043;biosynthetic processHHGO:0009058;cellular processHHGO:0009987;protein metabolic processHHGO:0019538;primary metabolic processHHGO:0044238;metabolic processHHGO:0008152;translationHHGO:0006412	cytoplasmHHGO:0005737;cell partHHGO:0044464;organelleHHGO:0043226;ribonucleoprotein complexHHGO:0030529;ribosomeHHGO:0005840;intracellularHHGO:0005622;macromolecular complexHHGO:0032991	ribosomal proteinHHPC00202;RNA binding proteinHHPC00031;nucleic acid bindingHHPC00171	none
Solyc01g007680.1	-1	0	-1	0	0	0	0	0	0	0	0	0	0	0	0	0	0	Orf146 protein (AHRD V1 ***- Q9MFF3_BETVU)	#N/A	#N/A	#N/A	#N/A	#N/A	#N/A
Solyc01g007690.2	0	0	0	1	0	0	0	0	0	0	0	0	0	0	0	0	0	Unknown Protein (AHRD V1)	#N/A	#N/A	#N/A	#N/A	#N/A	#N/A
Solyc01g007700.2	-1	-1	1	1	0	0	1	1	-1	0	0	0	0	0	0	0	0	Conserved protein (AHRD V1 *-*- C7TFZ2_LACRL)	FAMILY NOT NAMED	none	none	none	none	none
Solyc01g007720.2	0	0	0	0	0	0	0	0	0	0	0	0	0	0	0	0	0	ORF42f (AHRD V1 *-*- Q32989_PINTH)	FAMILY NOT NAMED	none	none	none	none	none
Solyc01g007740.2	0	0	-1	1	0	0	0	0	0	0	0	0	0	0	1	0	0	Peroxiredoxin (AHRD V1 **-- Q9FE12_PHAVU)%3B contains Interpro domain(s) IPR000866 Alkyl hydroperoxide reductase/ Thiol specific antioxidant/ Mal allergen	THIOREDOXIN PEROXIDASE	peroxidase activityHHGO:0004601;antioxidant activityHHGO:0016209;oxidoreductase activityHHGO:0016491;catalytic activityHHGO:0003824	metabolic processHHGO:0008152	none	peroxidaseHHPC00180;oxidoreductaseHHPC00176	none
Solyc01g007750.2	0	0	0	0	0	0	0	0	0	0	0	0	0	0	0	0	0	Mitochondrial transcription termination factor (Fragment) (AHRD V1 *--- C6FB10_PSEMZ)%3B contains Interpro domain(s) IPR003690 Mitochodrial transcription termination factor-related	CGI-12 PROTEIN-RELATED	none	none	none	none	none
Solyc01g007760.2	0	1	0	0	0	0	0	0	0	0	0	0	0	0	0	0	0	Transcription factor E2F (AHRD V1 **** Q9LEL4_DAUCA)%3B contains Interpro domain(s) IPR015633 E2F Family	TRANSCRIPTION FACTOR E2F	nucleic acid bindingHHGO:0003676;sequence-specific DNA binding transcription factor activityHHGO:0003700;bindingHHGO:0005488;DNA bindingHHGO:0003677	signal transductionHHGO:0007165;transcription, DNA-dependentHHGO:0006351;regulation of transcription from RNA polymerase II promoterHHGO:0006357;cell cycleHHGO:0007049;cell communicationHHGO:0007154;cellular processHHGO:0009987;nucleobase-containing compound metabolic processHHGO:0006139;transcription from RNA polymerase II promoterHHGO:0006366;primary metabolic processHHGO:0044238;metabolic proc…	none	transcription factorHHPC00218;nucleic acid bindingHHPC00171	none
Solyc01g007770.2	0	0	0	0	0	0	0	0	0	0	0	0	0	0	0	0	0	Genomic DNA chromosome 5 P1 clone MHF15 (AHRD V1 ***- Q9FNI0_ARATH)	FAMILY NOT NAMED	none	none	none	none	none
Solyc01g007780.2	-1	-1	0	0	0	0	0	0	0	0	0	0	0	0	0	0	0	Receptor expression-enhancing protein 3 (AHRD V1 *--- B6TB01_MAIZE)%3B contains Interpro domain(s) IPR004345 TB2/DP1 and HVA22 related protein	HVA22-LIKE PROTEINS	transmembrane transporter activityHHGO:0022857;receptor activityHHGO:0004872;transporter activityHHGO:0005215	carbohydrate metabolic processHHGO:0005975;carbohydrate transportHHGO:0008643;primary metabolic processHHGO:0044238;metabolic processHHGO:0008152;transportHHGO:0006810	none	transporterHHPC00227;receptorHHPC00197	none
Solyc01g007790.2	0	0	0	0	0	0	0	0	0	0	0	0	0	0	0	0	0	UPF0554 protein C2orf43 homolog (AHRD V1 **-- CB043_CHICK)%3B contains Interpro domain(s) IPR019363 Protein of unknown function DUF2305	LIPASE	none	localizationHHGO:0051179	cytoplasmHHGO:0005737;cell partHHGO:0044464;lipid particleHHGO:0005811;intracellularHHGO:0005622	none	none
Solyc01g007800.2	0	0	0	0	0	0	0	0	0	0	0	0	0	0	0	0	0	Plant-specific domain TIGR01568 family protein (AHRD V1 *--- B6SZV1_MAIZE)%3B contains Interpro domain(s) IPR006458 Protein of unknown function DUF623%2C plant	FAMILY NOT NAMED	none	none	none	none	none
Solyc01g007810.1	-1	0	0	0	0	0	0	0	0	0	0	0	1	0	0	0	0	Plant-specific domain TIGR01568 family protein (AHRD V1 *--- B6U9N9_MAIZE)%3B contains Interpro domain(s) IPR006458 Protein of unknown function DUF623%2C plant	FAMILY NOT NAMED	none	none	none	none	none
Solyc01g007820.1	0	0	0	0	0	0	0	0	0	0	0	0	0	0	0	0	0	Unknown Protein (AHRD V1)	#N/A	#N/A	#N/A	#N/A	#N/A	#N/A
Solyc01g007830.1	0	0	0	0	0	0	0	0	0	0	0	0	0	0	0	0	0	Unknown Protein (AHRD V1)	#N/A	#N/A	#N/A	#N/A	#N/A	#N/A
Solyc01g007840.2	0	0	-1	1	0	1	0	0	0	0	0	0	0	0	0	0	0	CCR4-NOT transcription complex subunit 7 (AHRD V1 ***- B4FG48_MAIZE)%3B contains Interpro domain(s) IPR006941 Ribonuclease CAF1	CCR4-NOT TRANSCRIPTION COMPLEX SUBUNIT	hydrolase activityHHGO:0016787;hydrolase activity, acting on ester bondsHHGO:0016788;nuclease activityHHGO:0004518;exoribonuclease activityHHGO:0004532;catalytic activityHHGO:0003824	catabolic processHHGO:0009056;RNA catabolic processHHGO:0006401;cellular processHHGO:0009987;nucleobase-containing compound metabolic processHHGO:0006139;RNA metabolic processHHGO:0016070;nitrogen compound metabolic processHHGO:0006807;metabolic processHHGO:0008152;primary metabolic processHHGO:0044238	cell partHHGO:0044464;protein complexHHGO:0043234;intracellularHHGO:0005622;macromolecular complexHHGO:0032991	transcription factorHHPC00218	none
Solyc01g007850.2	0	0	0	0	0	0	0	0	0	0	0	0	0	0	0	0	0	Pentatricopeptide repeat-containing protein (AHRD V1 ***- D7MHD4_ARALY)%3B contains Interpro domain(s) IPR002885 Pentatricopeptide repeat	FAMILY NOT NAMED	nucleic acid bindingHHGO:0003676;RNA bindingHHGO:0003723;transmembrane transporter activityHHGO:0022857;transferase activityHHGO:0016740;bindingHHGO:0005488;catalytic activityHHGO:0003824;transmembrane receptor protein kinase activityHHGO:0019199;transmembrane receptor protein serine_threonine kinase activityHHGO:0004675;receptor activityHHGO:0004872;transporter activityHHGO:0005215;kinase activi…	intracellular protein transportHHGO:0006886;protein phosphorylationHHGO:0006468;protein metabolic processHHGO:0019538;cellular protein modification processHHGO:0006464;metabolic processHHGO:0008152;transportHHGO:0006810;protein transportHHGO:0015031;primary metabolic processHHGO:0044238	none	protein kinase receptorHHPC00194;protein kinaseHHPC00193;serine_threonine protein kinase receptorHHPC00205;transporterHHPC00227;transferaseHHPC00220;RNA binding proteinHHPC00031;kinaseHHPC00137;receptorHHPC00197;nucleic acid bindingHHPC00171	none
Solyc01g007860.2	0	0	0	0	0	0	0	0	0	0	0	0	0	0	0	0	0	Ubiquitin-conjugating enzyme family protein-like (AHRD V1 ***- Q3HVN0_SOLTU)%3B contains Interpro domain(s) IPR000608 Ubiquitin-conjugating enzyme%2C E2	UBIQUITIN-CONJUGATING ENZYME E2	protein bindingHHGO:0005515;bindingHHGO:0005488	DNA repairHHGO:0006281;response to stimulusHHGO:0050896;response to stressHHGO:0006950;nitrogen compound metabolic processHHGO:0006807;cellular processHHGO:0009987;protein metabolic processHHGO:0019538;nucleobase-containing compound metabolic processHHGO:0006139;cellular protein modification processHHGO:0006464;DNA metabolic processHHGO:0006259;primary metabolic processHHGO:0044238;metabolic proc…	cytoplasmHHGO:0005737;cell partHHGO:0044464;organelleHHGO:0043226;nucleusHHGO:0005634;intracellularHHGO:0005622	none	Ubiquitin proteasome pathwayHHP00060 E2HHP01491
Solyc01g007870.2	0	-1	1	0	-1	0	-1	0	-1	0	0	0	1	0	0	1	0	Cyclin B-like protein (AHRD V1 *-*- Q5U8T5_9SOLA)	FAMILY NOT NAMED	none	none	none	none	none
Solyc01g007880.2	0	0	0	0	0	0	0	0	0	0	0	0	0	0	0	0	0	MORN repeat protein (AHRD V1 *--- D4V7H0_BACVU)%3B contains Interpro domain(s) IPR019746 Tubulin/FtsZ%2C N-terminal	PHOSPHATIDYLINOSITOL-4-PHOSPHATE 5-KINASE RELATED	transferase activityHHGO:0016740;catalytic activityHHGO:0003824;kinase activityHHGO:0016301	cellular processHHGO:0009987	none	transferaseHHPC00220;kinaseHHPC00137	none
Solyc01g007890.1	0	0	-1	0	1	0	0	0	0	-1	0	0	0	0	0	0	0	Unknown Protein (AHRD V1)	#N/A	#N/A	#N/A	#N/A	#N/A	#N/A
Solyc01g007900.2	0	0	0	0	0	0	0	0	0	0	0	0	0	0	0	0	0	Tobamovirus multiplication protein (Fragment) (AHRD V1 ***- B0ZZ80_ARAHY)%3B contains Interpro domain(s) IPR009457 Protein of unknown function DUF1084	FAMILY NOT NAMED	none	none	none	none	none
Solyc01g007910.2	0	0	0	0	0	0	0	0	0	0	0	0	0	0	0	0	0	Succinyl-CoA ligase (AHRD V1 ***- B9RL91_RICCO)%3B contains Interpro domain(s) IPR005810 Succinyl-CoA ligase%2C alpha subunit	#N/A	#N/A	#N/A	#N/A	#N/A	#N/A
Solyc01g007920.2	0	0	0	0	0	0	0	0	-1	0	0	0	0	0	0	0	0	Isochorismatase family protein (AHRD V1 ***- B5IAW4_ACIB4)%3B contains Interpro domain(s) IPR000868 Isochorismatase-like	FAMILY NOT NAMED	hydrolase activityHHGO:0016787;catalytic activityHHGO:0003824	coenzyme metabolic processHHGO:0006732;nitrogen compound metabolic processHHGO:0006807;metabolic processHHGO:0008152	none	hydrolaseHHPC00121	none
Solyc01g007930.2	0	0	0	0	0	0	0	0	0	0	0	0	0	0	0	0	0	Sel1 domain protein repeat-containing protein (AHRD V1 *-*- A5GBQ0_GEOUR)%3B contains Interpro domain(s) IPR011990 Tetratricopeptide-like helical	SEL-1-LIKE PROTEIN	protein bindingHHGO:0005515;bindingHHGO:0005488;enzyme regulator activityHHGO:0030234	none	none	enzyme modulatorHHPC00095	none
Solyc01g007940.2	-1	-1	-1	1	1	0	1	0	0	0	0	0	0	0	1	0	0	Alanine aminotransferase 2 (AHRD V1 **** A8IKE5_SOYBN)%3B contains Interpro domain(s) IPR004839 Aminotransferase%2C class I and II	SUBGROUP I AMINOTRANSFERASE RELATED	transaminase activityHHGO:0008483;transferase activityHHGO:0016740;catalytic activityHHGO:0003824	cellular amino acid metabolic processHHGO:0006520;porphyrin-containing compound metabolic processHHGO:0006778;nitrogen compound metabolic processHHGO:0006807;primary metabolic processHHGO:0044238;metabolic processHHGO:0008152	none	transaminaseHHPC00216;transferaseHHPC00220	none
Solyc01g007950.2	0	0	0	0	0	0	0	0	0	0	0	0	0	0	0	0	0	Peroxidase 1 (AHRD V1 *-*- B6T173_MAIZE)%3B contains Interpro domain(s) IPR000823 Plant peroxidase	FAMILY NOT NAMED	peroxidase activityHHGO:0004601;antioxidant activityHHGO:0016209;oxidoreductase activityHHGO:0016491;catalytic activityHHGO:0003824	response to stimulusHHGO:0050896;cellular component organizationHHGO:0016043;response to stressHHGO:0006950;cellular processHHGO:0009987;metabolic processHHGO:0008152	cell junctionHHGO:0030054;cell partHHGO:0044464;external encapsulating structureHHGO:0030312;cell wallHHGO:0005618	none	none
Solyc01g007960.2	1	1	0	0	1	0	0	0	0	0	0	0	0	0	0	0	0	RLK%2C Receptor like protein%2C putative resistance protein with an antifungal domain	FAMILY NOT NAMED	transferase activityHHGO:0016740;catalytic activityHHGO:0003824;kinase activityHHGO:0016301;protein kinase activityHHGO:0004672	protein phosphorylationHHGO:0006468;cellular processHHGO:0009987;protein metabolic processHHGO:0019538;phosphate-containing compound metabolic processHHGO:0006796;primary metabolic processHHGO:0044238;cellular protein modification processHHGO:0006464;metabolic processHHGO:0008152	cell partHHGO:0044464;membraneHHGO:0016020;plasma membraneHHGO:0005886	none	none
Solyc01g007980.2	1	0	0	0	0	0	0	0	0	0	0	0	0	0	0	0	0	RLK%2C Receptor like protein%2C putative resistance protein with an antifungal domain	FAMILY NOT NAMED	transferase activityHHGO:0016740;catalytic activityHHGO:0003824;kinase activityHHGO:0016301;protein kinase activityHHGO:0004672	protein phosphorylationHHGO:0006468;cellular processHHGO:0009987;protein metabolic processHHGO:0019538;phosphate-containing compound metabolic processHHGO:0006796;primary metabolic processHHGO:0044238;cellular protein modification processHHGO:0006464;metabolic processHHGO:0008152	cell partHHGO:0044464;membraneHHGO:0016020;plasma membraneHHGO:0005886	none	none
Solyc01g007990.2	0	0	0	0	0	0	0	0	0	0	0	0	0	0	0	0	0	RLK%2C Receptor like protein%2C putative resistance protein with an antifungal domain	FAMILY NOT NAMED	transferase activityHHGO:0016740;catalytic activityHHGO:0003824;kinase activityHHGO:0016301;protein kinase activityHHGO:0004672	protein phosphorylationHHGO:0006468;cellular processHHGO:0009987;protein metabolic processHHGO:0019538;phosphate-containing compound metabolic processHHGO:0006796;primary metabolic processHHGO:0044238;cellular protein modification processHHGO:0006464;metabolic processHHGO:0008152	cell partHHGO:0044464;membraneHHGO:0016020;plasma membraneHHGO:0005886	none	none
Solyc01g008000.2	0	0	0	0	0	0	0	0	0	0	0	0	0	0	0	0	0	ADP-ribosylation factor (AHRD V1 ***- Q76ME3_WHEAT)%3B contains Interpro domain(s) IPR006688 ADP-ribosylation factor	ADP RIBOSYLATION FACTOR-RELATED	GTPase activityHHGO:0003924;hydrolase activityHHGO:0016787;protein bindingHHGO:0005515;bindingHHGO:0005488;catalytic activityHHGO:0003824	intracellular protein transportHHGO:0006886;vesicle-mediated transportHHGO:0016192;signal transductionHHGO:0007165;G-protein coupled receptor signaling pathwayHHGO:0007186;cellular processHHGO:0009987;cell surface receptor signaling pathwayHHGO:0007166;transportHHGO:0006810;protein transportHHGO:0015031	none	small GTPaseHHPC00208;G-proteinHHPC00020;enzyme modulatorHHPC00095	none
Solyc01g008010.2	-1	-1	0	0	0	0	0	0	0	0	0	0	0	0	0	1	0	Os09g0327550 protein (Fragment) (AHRD V1 *-*- C7J753_ORYSJ)%3B contains Interpro domain(s) IPR003863 Protein of unknown function DUF220	FAMILY NOT NAMED	none	none	none	none	none
Solyc01g008020.2	0	0	0	0	0	1	0	0	0	0	0	0	0	0	0	0	0	Equilibrative nucleoside transporter 1 (AHRD V1 **** Q4W6L4_ORYSJ)%3B contains Interpro domain(s) IPR002259 Delayed-early response protein/equilibrative nucleoside transporter	EQUILIBRATIVE NUCLEOSIDE TRANSPORTER	transmembrane transporter activityHHGO:0022857;transporter activityHHGO:0005215	nucleobase-containing compound metabolic processHHGO:0006139;nucleobase-containing compound transportHHGO:0015931;primary metabolic processHHGO:0044238;metabolic processHHGO:0008152;transportHHGO:0006810	none	transporterHHPC00227	none
Solyc01g008060.2	0	-1	0	0	0	0	0	0	0	0	0	0	0	0	0	1	0	Phosphoglycerate mutase (AHRD V1 *--- A4TBN9_MYCGI)%3B contains Interpro domain(s) IPR002156 Ribonuclease H	FAMILY NOT NAMED	none	none	none	none	none
Solyc01g008070.2	0	0	0	0	0	0	0	0	0	0	0	0	0	0	0	0	0	Alpha/beta superfamily hydrolase (AHRD V1 *--- D0CIF5_9SYNE)%3B contains Interpro domain(s) IPR010765 Protein of unknown function DUF1350	FAMILY NOT NAMED	none	none	none	none	none
Solyc01g008080.2	0	0	0	0	0	0	0	0	0	0	0	0	0	0	0	0	0	Ribosomal protein S27 (AHRD V1 ***- Q3HVK9_SOLTU)%3B contains Interpro domain(s) IPR000592 Ribosomal protein S27e	40S RIBOSOMAL PROTEIN S27	structural constituent of ribosomeHHGO:0003735;structural molecule activityHHGO:0005198	cellular component biogenesisHHGO:0044085;organelle organizationHHGO:0006996;cellular component organizationHHGO:0016043;biosynthetic processHHGO:0009058;cellular processHHGO:0009987;protein metabolic processHHGO:0019538;primary metabolic processHHGO:0044238;metabolic processHHGO:0008152;translationHHGO:0006412	cytoplasmHHGO:0005737;cell partHHGO:0044464;ribonucleoprotein complexHHGO:0030529;intracellularHHGO:0005622;macromolecular complexHHGO:0032991;cytosolHHGO:0005829;organelleHHGO:0043226;ribosomeHHGO:0005840	ribosomal proteinHHPC00202;RNA binding proteinHHPC00031;nucleic acid bindingHHPC00171	none
Solyc01g008090.2	0	0	0	0	0	0	0	0	0	0	0	0	0	0	0	0	0	Ribosomal protein S27 (AHRD V1 ***- Q3HVK9_SOLTU)%3B contains Interpro domain(s) IPR000592 Ribosomal protein S27e	40S RIBOSOMAL PROTEIN S27	structural constituent of ribosomeHHGO:0003735;structural molecule activityHHGO:0005198	cellular component biogenesisHHGO:0044085;organelle organizationHHGO:0006996;cellular component organizationHHGO:0016043;biosynthetic processHHGO:0009058;cellular processHHGO:0009987;protein metabolic processHHGO:0019538;primary metabolic processHHGO:0044238;metabolic processHHGO:0008152;translationHHGO:0006412	cytoplasmHHGO:0005737;cell partHHGO:0044464;ribonucleoprotein complexHHGO:0030529;intracellularHHGO:0005622;macromolecular complexHHGO:0032991;cytosolHHGO:0005829;organelleHHGO:0043226;ribosomeHHGO:0005840	ribosomal proteinHHPC00202;RNA binding proteinHHPC00031;nucleic acid bindingHHPC00171	none
Solyc01g008100.2	0	0	0	0	0	0	0	0	0	0	0	0	0	0	0	0	0	Transferase transferring glycosyl groups (AHRD V1 **-* D7MH74_ARALY)	FAMILY NOT NAMED	none	none	none	none	none
Solyc01g008110.2	0	0	0	-1	0	0	0	0	0	0	0	0	0	0	0	0	0	Cytochrome P450	FAMILY NOT NAMED	oxidoreductase activityHHGO:0016491;catalytic activityHHGO:0003824	lipid metabolic processHHGO:0006629;steroid metabolic processHHGO:0008202;primary metabolic processHHGO:0044238;metabolic processHHGO:0008152	none	none	none
Solyc01g008120.2	0	0	0	0	0	0	0	0	0	0	0	0	0	0	0	0	0	Histone acetyltransferase (AHRD V1 **** B9HG17_POPTR)%3B contains Interpro domain(s) IPR009255 Transcriptional coactivation	CBP_P300-RELATED	transferase activity, transferring acyl groupsHHGO:0016746;nucleic acid bindingHHGO:0003676;transferase activityHHGO:0016740;acetyltransferase activityHHGO:0016407;bindingHHGO:0005488;catalytic activityHHGO:0003824;transcription cofactor activityHHGO:0003712;chromatin bindingHHGO:0003682;DNA bindingHHGO:0003677;sequence-specific DNA binding transcription factor activityHHGO:0003700	transcription, DNA-dependentHHGO:0006351;regulation of transcription from RNA polymerase II promoterHHGO:0006357;transcription from RNA polymerase II promoterHHGO:0006366;nucleobase-containing compound metabolic processHHGO:0006139;metabolic processHHGO:0008152;primary metabolic processHHGO:0044238	none	DNA binding proteinHHPC00009;transcription factorHHPC00218;chromatin_chromatin-binding proteinHHPC00077;transcription cofactorHHPC00217;transferaseHHPC00220;acetyltransferaseHHPC00038;nucleic acid bindingHHPC00171	DPP signaling pathwayHHP06213 NEJHHP06284;TGF-beta signaling pathwayHHP00052 Co-activators corepressorsHHP01282;SCW signaling pathwayHHP06216 NEJHHP06328;GBB signaling pathwayHHP06214 NEJHHP06295;BMP_activin signaling pathway-drosophilaHHP06211 NEJHHP06246;p53 pathwayHHP00059 CBPHHP04623;Wnt signaling pathwayHHP00057 CBPHHP01448;Transcription regulation by bZIP transcription factorHHP00055 CBP_P3…
Solyc01g008130.2	-1	0	0	0	0	0	0	0	0	0	0	0	0	0	0	0	0	DEP domain-containing protein 1B (AHRD V1 *--- DEP1B_HUMAN)%3B contains Interpro domain(s) IPR006869 Protein of unknown function DUF547	UNCHARACTERIZED	none	none	none	none	none
Solyc01g008140.2	-1	-1	0	0	0	0	0	0	0	0	0	0	0	0	0	0	0	Receptor kinase (AHRD V1 **** B8XA57_GOSBA)%3B contains Interpro domain(s) IPR002290 Serine/threonine protein kinase	FAMILY NOT NAMED	none	defense response to bacteriumHHGO:0042742	none	none	none
Solyc01g008150.1	0	0	0	0	0	0	0	0	-1	0	0	0	0	0	0	0	0	Unknown Protein (AHRD V1)	#N/A	#N/A	#N/A	#N/A	#N/A	#N/A
Solyc01g008160.2	0	0	0	0	0	0	0	0	0	0	-1	0	0	0	0	-1	0	Tetratricopeptide repeat-containing protein (AHRD V1 ***- D7L8H9_ARALY)%3B contains Interpro domain(s) IPR011990 Tetratricopeptide-like helical	FAMILY NOT NAMED	none	cell communicationHHGO:0007154;signal transductionHHGO:0007165	none	none	none
Solyc01g008170.2	1	1	0	0	0	0	0	0	0	0	0	0	-1	0	0	0	0	Zinc finger CCCH domain-containing protein 17 (AHRD V1 ***- C3H17_ARATH)%3B contains Interpro domain(s) IPR000571 Zinc finger%2C CCCH-type	ZN-FINGER, C-X8-C-X5-C-X3-H TYPE-CONTAINING	nucleic acid bindingHHGO:0003676;bindingHHGO:0005488	none	none	nucleic acid bindingHHPC00171	none
Solyc01g008180.2	-1	-1	0	0	0	0	0	0	0	0	0	0	0	0	0	0	0	DNA-binding protein (Fragment) (AHRD V1 *--* Q42051_ARATH)%3B contains Interpro domain(s) IPR005516 Remorin%2C C-terminal region	FAMILY NOT NAMED	none	none	none	none	none
Solyc01g008190.2	0	0	0	0	0	0	0	0	0	0	0	0	0	0	0	0	0	Os05g0304100 protein (Fragment) (AHRD V1 *-*- Q0DJB8_ORYSJ)	UNCHARACTERIZED	transferase activity, transferring acyl groupsHHGO:0016746;transferase activityHHGO:0016740;acetyltransferase activityHHGO:0016407;catalytic activityHHGO:0003824	organelle organizationHHGO:0006996;chromatin organizationHHGO:0006325;cellular component organizationHHGO:0016043;protein metabolic processHHGO:0019538;cellular processHHGO:0009987;protein acetylationHHGO:0006473;primary metabolic processHHGO:0044238;metabolic processHHGO:0008152;cellular protein modification processHHGO:0006464	cell partHHGO:0044464;organelleHHGO:0043226;nucleusHHGO:0005634;protein complexHHGO:0043234;intracellularHHGO:0005622;nucleoplasmHHGO:0005654;macromolecular complexHHGO:0032991	none	none
Solyc01g008200.2	0	0	0	0	0	0	0	0	0	0	0	0	0	0	0	0	0	Os05g0304100 protein (Fragment) (AHRD V1 ***- Q0DJB8_ORYSJ)	UNCHARACTERIZED	transferase activity, transferring acyl groupsHHGO:0016746;transferase activityHHGO:0016740;acetyltransferase activityHHGO:0016407;catalytic activityHHGO:0003824	organelle organizationHHGO:0006996;chromatin organizationHHGO:0006325;cellular component organizationHHGO:0016043;protein metabolic processHHGO:0019538;cellular processHHGO:0009987;protein acetylationHHGO:0006473;primary metabolic processHHGO:0044238;metabolic processHHGO:0008152;cellular protein modification processHHGO:0006464	cell partHHGO:0044464;organelleHHGO:0043226;nucleusHHGO:0005634;protein complexHHGO:0043234;intracellularHHGO:0005622;nucleoplasmHHGO:0005654;macromolecular complexHHGO:0032991	none	none
Solyc01g008210.2	0	0	0	0	0	0	0	0	0	0	0	0	0	0	0	0	0	Unknown Protein (AHRD V1)	#N/A	#N/A	#N/A	#N/A	#N/A	#N/A
Solyc01g008220.2	1	0	0	0	0	0	0	0	0	0	0	0	0	0	0	0	0	Arabinogalactan protein (AHRD V1 ***- B6SST2_MAIZE)	FAMILY NOT NAMED	none	none	none	none	none
Solyc01g008230.2	0	0	0	0	0	0	0	0	0	0	0	0	0	0	0	0	0	TCP family transcription factor (AHRD V1 *-** A6MCZ2_9ORYZ)%3B contains Interpro domain(s) IPR005333 Transcription factor%2C TCP	FAMILY NOT NAMED	none	none	none	none	none
Solyc01g008240.2	0	0	0	-1	0	0	0	0	0	0	0	0	0	0	0	0	0	Solute carrier family 2%2C facilitated glucose transporter member 3 (AHRD V1 ***- GTR3_BOVIN)%3B contains Interpro domain(s) IPR003663 Sugar/inositol transporter	FAMILY NOT NAMED	transmembrane transporter activityHHGO:0022857;transporter activityHHGO:0005215;cation transmembrane transporter activityHHGO:0008324;carbohydrate transmembrane transporter activityHHGO:0015144	localizationHHGO:0051179;cation transportHHGO:0006812;cellular processHHGO:0009987;carbohydrate transportHHGO:0008643;ion transportHHGO:0006811;transportHHGO:0006810	none	carbohydrate transporterHHPC00067	none
Solyc01g008250.2	0	0	0	0	0	0	0	0	0	0	0	0	0	0	0	0	0	Thioredoxin X (AHRD V1 ***- B6T9S0_MAIZE)%3B contains Interpro domain(s) IPR015467 Thioredoxin%2C core	THIOREDOXIN	catalytic activityHHGO:0003824;oxidoreductase activityHHGO:0016491	regulation of biological processHHGO:0050789;response to stimulusHHGO:0050896;response to stressHHGO:0006950;sulfur compound metabolic processHHGO:0006790;protein foldingHHGO:0006457;biological regulationHHGO:0065007;homeostatic processHHGO:0042592;protein metabolic processHHGO:0019538;cellular processHHGO:0009987;primary metabolic processHHGO:0044238;metabolic processHHGO:0008152	cytoplasmHHGO:0005737;cell partHHGO:0044464;intracellularHHGO:0005622	oxidoreductaseHHPC00176	none
Solyc01g008260.2	0	0	0	0	0	0	0	0	0	0	0	0	0	0	0	0	0	E2F-associated phosphoprotein (AHRD V1 ***- Q0P5M4_BOVIN)%3B contains Interpro domain(s) IPR019370 E2F-associated phosphoprotein%2C C-terminal	UNCHARACTERIZED	none	regulation of biological processHHGO:0050789;transcription, DNA-dependentHHGO:0006351;regulation of transcription from RNA polymerase II promoterHHGO:0006357;RNA metabolic processHHGO:0016070;nitrogen compound metabolic processHHGO:0006807;regulation of nucleobase-containing compound metabolic processHHGO:0019219;transcription elongation from RNA polymerase II promoterHHGO:0006368;biological regu…	cell partHHGO:0044464;organelleHHGO:0043226;nucleusHHGO:0005634;intracellularHHGO:0005622	none	none
Solyc01g008270.2	0	0	0	0	0	0	0	0	0	0	0	0	0	0	0	0	0	Prefoldin subunit 5 (AHRD V1 ***- B6TVU2_MAIZE)%3B contains Interpro domain(s) IPR011599 Prefoldin alpha subunit	PREFOLDIN SUBUNIT 5	none	none	none	none	none
Solyc01g008290.2	1	1	0	0	0	0	0	0	0	0	-1	0	0	0	0	0	0	Dihydroorotate dehydrogenase (AHRD V1 ***- B6U892_MAIZE)%3B contains Interpro domain(s) IPR005719 Dihydroorotate dehydrogenase%2C class 2	FAMILY NOT NAMED	oxidoreductase activityHHGO:0016491;catalytic activityHHGO:0003824	pyrimidine nucleobase metabolic processHHGO:0006206;biosynthetic processHHGO:0009058;cellular processHHGO:0009987;nitrogen compound metabolic processHHGO:0006807;nucleobase-containing compound metabolic processHHGO:0006139;primary metabolic processHHGO:0044238;metabolic processHHGO:0008152	cytoplasmHHGO:0005737;cell partHHGO:0044464;intracellularHHGO:0005622	dehydrogenaseHHPC00092;reductaseHHPC00198;oxidoreductaseHHPC00176	De novo pyrimidine ribonucleotides biosythesisHHP02740 Dihydrooratate oxidaseHHP02927
Solyc01g008310.2	0	0	0	0	0	0	0	0	0	0	0	0	0	0	0	0	0	Phenylalanyl-tRNA synthetase beta chain (AHRD V1 **** B6SHI1_MAIZE)%3B contains Interpro domain(s) IPR004531 Phenylalanyl-tRNA synthetase%2C class IIc%2C beta subunit%2C archae/euk cytosolic	PHENYLALANYL-TRNA SYNTHETASE BETA CHAIN AND LEUCINE-RICH REPEAT-CONTAINING PROTEIN 47	ligase activityHHGO:0016874;aminoacyl-tRNA ligase activityHHGO:0004812;catalytic activityHHGO:0003824	tRNA metabolic processHHGO:0006399;RNA metabolic processHHGO:0016070;nitrogen compound metabolic processHHGO:0006807;tRNA aminoacylation for protein translationHHGO:0006418;cellular amino acid metabolic processHHGO:0006520;biosynthetic processHHGO:0009058;cellular processHHGO:0009987;protein metabolic processHHGO:0019538;nucleobase-containing compound metabolic processHHGO:0006139;translationHHGO…	cytoplasmHHGO:0005737;cell partHHGO:0044464;protein complexHHGO:0043234;intracellularHHGO:0005622;macromolecular complexHHGO:0032991	aminoacyl-tRNA synthetaseHHPC00047;ligaseHHPC00142;nucleic acid bindingHHPC00171	none
Solyc01g008320.2	-1	-1	0	1	0	0	0	0	0	0	0	0	0	0	0	0	0	DDHD domain containing 1 (AHRD V1 *--- Q3ZAU5_RAT)%3B contains Interpro domain(s) IPR004177 DDHD	FAMILY NOT NAMED	hydrolase activityHHGO:0016787;lipase activityHHGO:0016298;hydrolase activity, acting on ester bondsHHGO:0016788;phospholipase activityHHGO:0004620;catalytic activityHHGO:0003824	intracellular protein transportHHGO:0006886;vesicle-mediated transportHHGO:0016192;protein transportHHGO:0015031;transportHHGO:0006810	none	lipaseHHPC00143;phospholipaseHHPC00186;membrane traffic proteinHHPC00150;hydrolaseHHPC00121	none
Solyc01g008330.2	0	0	-1	0	0	0	0	0	0	0	0	0	0	0	0	0	0	Acetyl-CoA carboxylase biotin carboxylase (AHRD V1 ***- B4VQU4_9CYAN)%3B contains Interpro domain(s) IPR004549 Acetyl-CoA carboxylase%2C biotin carboxylase	FAMILY NOT NAMED	ligase activityHHGO:0016874;catalytic activityHHGO:0003824	lipid metabolic processHHGO:0006629;monosaccharide metabolic processHHGO:0005996;fatty acid metabolic processHHGO:0006631;coenzyme metabolic processHHGO:0006732;gluconeogenesisHHGO:0006094;carbohydrate metabolic processHHGO:0005975;metabolic processHHGO:0008152;primary metabolic processHHGO:0044238;fatty acid biosynthetic processHHGO:0006633	none	ligaseHHPC00142	none
Solyc01g008340.2	0	0	0	0	0	0	0	0	0	0	0	0	0	0	0	0	0	50S ribosomal protein L19 (AHRD V1 *-*- B6T8M1_MAIZE)%3B contains Interpro domain(s) IPR001857 Ribosomal protein L19	RIBOSOMAL PROTEIN L19	structural constituent of ribosomeHHGO:0003735;structural molecule activityHHGO:0005198	none	none	ribosomal proteinHHPC00202;RNA binding proteinHHPC00031;nucleic acid bindingHHPC00171	none
Solyc01g008350.2	1	0	0	0	0	0	0	0	0	0	0	0	0	0	0	1	0	DNAJ heat shock N-terminal domain-containing protein-like (AHRD V1 ***- Q5QMD6_ORYSJ)	DNAJ HOMOLOG SUBFAMILY C MEMBER 8_LIPOPOLYSACCHARIDE SPECIFIC RESPONSE-7-RELATED	none	none	none	chaperoneHHPC00072	none
Solyc01g008360.2	1	1	0	0	0	0	0	-1	0	0	0	0	0	0	0	0	0	Pre-mRNA branch site p14-like protein (AHRD V1 **-- B6T0W0_MAIZE)%3B contains Interpro domain(s) IPR012677 Nucleotide-binding%2C alpha-beta plait	FAMILY NOT NAMED	none	RNA metabolic processHHGO:0016070;nitrogen compound metabolic processHHGO:0006807;mRNA processingHHGO:0006397;RNA splicing, via transesterification reactionsHHGO:0000375;cellular processHHGO:0009987;nucleobase-containing compound metabolic processHHGO:0006139;RNA splicingHHGO:0008380;primary metabolic processHHGO:0044238;mRNA splicing, via spliceosomeHHGO:0000398;metabolic processHHGO:0008152	cell partHHGO:0044464;organelleHHGO:0043226;ribonucleoprotein complexHHGO:0030529;nucleusHHGO:0005634;protein complexHHGO:0043234;intracellularHHGO:0005622;macromolecular complexHHGO:0032991	mRNA processing factorHHPC00147;RNA binding proteinHHPC00031;mRNA splicing factorHHPC00148;nucleic acid bindingHHPC00171	none
Solyc01g008370.2	0	0	0	0	0	0	0	0	0	0	0	0	0	0	0	0	0	26S proteasome regulatory subunit (AHRD V1 ***- A8J8V5_CHLRE)%3B contains Interpro domain(s) IPR000555 Mov34/MPN/PAD-1	EUKARYOTIC TRANSLATION INITIATION FACTOR 3 SUBUNIT F-RELATED	none	catabolic processHHGO:0009056;cellular processHHGO:0009987;protein metabolic processHHGO:0019538;primary metabolic processHHGO:0044238;proteolysisHHGO:0006508;metabolic processHHGO:0008152	cell partHHGO:0044464;protein complexHHGO:0043234;macromolecular complexHHGO:0032991;intracellularHHGO:0005622	none	Ubiquitin proteasome pathwayHHP00060 26S proteasomeHHP01489;Cell cycleHHP00013 ProteasomeHHP00480
Solyc01g008380.1	1	1	0	0	0	0	0	0	0	0	0	0	0	0	0	0	0	Pentatricopeptide repeat-containing protein (AHRD V1 ***- D7KKP4_ARALY)	#N/A	#N/A	#N/A	#N/A	#N/A	#N/A
Solyc01g008400.2	0	1	0	0	0	0	0	0	0	0	0	0	0	0	0	0	0	Unknown Protein (AHRD V1)	#N/A	#N/A	#N/A	#N/A	#N/A	#N/A
Solyc01g008410.1	0	0	0	0	0	0	0	0	0	0	0	0	0	0	0	0	0	LRR receptor-like serine/threonine-protein kinase%2C RLP	FAMILY NOT NAMED	none	none	none	none	none
Solyc01g008430.1	1	1	1	-1	0	0	0	0	-1	0	-1	0	-1	0	0	1	-1	Unknown Protein (AHRD V1)	#N/A	#N/A	#N/A	#N/A	#N/A	#N/A
Solyc01g008440.2	1	0	0	-1	0	0	0	0	0	0	0	0	0	0	0	0	0	Calcium-dependent protein kinase 8 (AHRD V1 **** Q6KC54_NICPL)%3B contains Interpro domain(s) IPR002290 Serine/threonine protein kinase	SERINE_THREONINE-PROTEIN KINASE	protein bindingHHGO:0005515;calmodulin bindingHHGO:0005516;transferase activityHHGO:0016740;bindingHHGO:0005488;catalytic activityHHGO:0003824;kinase activityHHGO:0016301;protein kinase activityHHGO:0004672	regulation of biological processHHGO:0050789;response to stimulusHHGO:0050896;response to endogenous stimulusHHGO:0009719;signal transductionHHGO:0007165;biological regulationHHGO:0065007;cell communicationHHGO:0007154;protein phosphorylationHHGO:0006468;intracellular signal transductionHHGO:0035556;protein metabolic processHHGO:0019538;cellular processHHGO:0009987;cellular protein modification p…	cytoplasmHHGO:0005737;cell partHHGO:0044464;membraneHHGO:0016020;intracellularHHGO:0005622;plasma membraneHHGO:0005886	microtubule family cytoskeletal proteinHHPC00157;non-receptor serine_threonine protein kinaseHHPC00167;protein kinaseHHPC00193;cytoskeletal proteinHHPC00085;transferaseHHPC00220;kinaseHHPC00137;non-motor microtubule binding proteinHHPC00166	none
Solyc01g008450.1	0	1	0	0	0	0	0	0	0	0	0	0	0	0	0	0	0	Unknown Protein (AHRD V1)	FAMILY NOT NAMED	none	none	none	none	none
Solyc01g008460.2	0	0	0	0	0	0	0	0	0	0	0	0	0	0	0	0	0	2Fe-2S ferredoxin (AHRD V1 **-- B6U5I8_MAIZE)%3B contains Interpro domain(s) IPR001041 Ferredoxin	FERREDOXIN_ADRENODOXIN	none	none	none	none	Vitamin D metabolism and pathwayHHP04396 FDXHHP04607
Solyc01g008470.2	1	0	0	0	0	0	0	0	0	1	0	0	0	0	0	0	0	Non-selective cation channel-2 family (AHRD V1 **-- C1N231_MICPS)%3B contains Interpro domain(s) IPR004728 Translocation protein Sec62	FAMILY NOT NAMED	none	none	none	none	none
Solyc01g008480.2	0	0	0	0	0	0	0	0	0	0	0	0	0	0	0	0	0	Pentatricopeptide repeat-containing protein (AHRD V1 ***- D7MTZ6_ARALY)%3B contains Interpro domain(s) IPR002885 Pentatricopeptide repeat	FAMILY NOT NAMED	nucleic acid bindingHHGO:0003676;RNA bindingHHGO:0003723;transmembrane transporter activityHHGO:0022857;transferase activityHHGO:0016740;bindingHHGO:0005488;catalytic activityHHGO:0003824;transmembrane receptor protein kinase activityHHGO:0019199;transmembrane receptor protein serine_threonine kinase activityHHGO:0004675;receptor activityHHGO:0004872;transporter activityHHGO:0005215;kinase activi…	intracellular protein transportHHGO:0006886;protein phosphorylationHHGO:0006468;protein metabolic processHHGO:0019538;cellular protein modification processHHGO:0006464;metabolic processHHGO:0008152;transportHHGO:0006810;protein transportHHGO:0015031;primary metabolic processHHGO:0044238	none	protein kinase receptorHHPC00194;protein kinaseHHPC00193;serine_threonine protein kinase receptorHHPC00205;transporterHHPC00227;transferaseHHPC00220;RNA binding proteinHHPC00031;kinaseHHPC00137;receptorHHPC00197;nucleic acid bindingHHPC00171	none
Solyc01g008490.2	0	1	0	0	0	0	0	0	0	0	0	0	0	0	0	0	0	Nuclear transcription factor Y subunit A-1 (AHRD V1 *-** B6TAR1_MAIZE)%3B contains Interpro domain(s) IPR001289 CCAAT-binding transcription factor%2C subunit B	TRANSCRIPTION FACTOR NF-Y ALPHA-RELATED	nucleic acid bindingHHGO:0003676;sequence-specific DNA binding transcription factor activityHHGO:0003700;bindingHHGO:0005488;DNA bindingHHGO:0003677	response to stimulusHHGO:0050896;regulation of transcription from RNA polymerase II promoterHHGO:0006357;transcription, DNA-dependentHHGO:0006351;response to stressHHGO:0006950;transcription from RNA polymerase II promoterHHGO:0006366;nucleobase-containing compound metabolic processHHGO:0006139;primary metabolic processHHGO:0044238;metabolic processHHGO:0008152	none	transcription factorHHPC00218;nucleic acid bindingHHPC00171	none
Solyc01g008500.2	0	0	0	0	0	0	0	0	0	0	0	0	0	0	0	0	0	Receptor serine/threonine kinase (AHRD V1 **** O49202_ORYSJ)%3B contains Interpro domain(s) IPR002290 Serine/threonine protein kinase	FAMILY NOT NAMED	none	none	none	none	none
Solyc01g008520.2	0	0	0	0	0	0	0	0	0	0	0	0	0	0	0	0	0	DNA repair protein XRCC2 (AHRD V1 ***- XRCC2_HUMAN)	RECA_RAD51_RADA DNA STRAND-PAIRING FAMILY MEMBER	pyrophosphatase activityHHGO:0016462;hydrolase activity, acting on ester bondsHHGO:0016788;nucleic acid bindingHHGO:0003676;nuclease activityHHGO:0004518;bindingHHGO:0005488;catalytic activityHHGO:0003824;single-stranded DNA bindingHHGO:0003697;DNA bindingHHGO:0003677;hydrolase activityHHGO:0016787;double-stranded DNA bindingHHGO:0003690;endodeoxyribonuclease activityHHGO:0004520	DNA repairHHGO:0006281;cellular component biogenesisHHGO:0044085;cellular component organizationHHGO:0016043;cellular processHHGO:0009987;nucleobase-containing compound metabolic processHHGO:0006139;DNA recombinationHHGO:0006310;primary metabolic processHHGO:0044238;phosphate-containing compound metabolic processHHGO:0006796;response to stimulusHHGO:0050896;reproductionHHGO:0000003;response to st…	cell partHHGO:0044464;organelleHHGO:0043226;nucleusHHGO:0005634;protein complexHHGO:0043234;chromosomeHHGO:0005694;intracellularHHGO:0005622;macromolecular complexHHGO:0032991	DNA binding proteinHHPC00009;DNA strand-pairing proteinHHPC00016;nucleic acid bindingHHPC00171;hydrolaseHHPC00121	none
Solyc01g008530.2	0	0	0	0	0	0	-1	0	0	0	0	0	0	0	0	0	0	Cinnamoyl CoA reductase-like protein (AHRD V1 ***- B9HNY0_POPTR)%3B contains Interpro domain(s) IPR016040 NAD(P)-binding domain	NAD DEPENDENT EPIMERASE_DEHYDRATASE	lyase activityHHGO:0016829;isomerase activityHHGO:0016853;racemase and epimerase activityHHGO:0016854;catalytic activityHHGO:0003824;oxidoreductase activityHHGO:0016491;hydro-lyase activityHHGO:0016836	lipid metabolic processHHGO:0006629;polysaccharide metabolic processHHGO:0005976;steroid metabolic processHHGO:0008202;glycogen metabolic processHHGO:0005977;cholesterol metabolic processHHGO:0008203;carbohydrate metabolic processHHGO:0005975;primary metabolic processHHGO:0044238;metabolic processHHGO:0008152	none	dehydrataseHHPC00091;epimerase_racemaseHHPC00096;isomeraseHHPC00135;oxidoreductaseHHPC00176;lyaseHHPC00144	none
Solyc01g008550.2	0	0	0	0	0	0	0	0	0	0	0	0	0	0	0	0	0	Cinnamoyl CoA reductase-like protein (AHRD V1 ***- B9HNY0_POPTR)%3B contains Interpro domain(s) IPR016040 NAD(P)-binding domain	NAD DEPENDENT EPIMERASE_DEHYDRATASE	lyase activityHHGO:0016829;isomerase activityHHGO:0016853;racemase and epimerase activityHHGO:0016854;catalytic activityHHGO:0003824;oxidoreductase activityHHGO:0016491;hydro-lyase activityHHGO:0016836	lipid metabolic processHHGO:0006629;polysaccharide metabolic processHHGO:0005976;steroid metabolic processHHGO:0008202;glycogen metabolic processHHGO:0005977;cholesterol metabolic processHHGO:0008203;carbohydrate metabolic processHHGO:0005975;primary metabolic processHHGO:0044238;metabolic processHHGO:0008152	none	dehydrataseHHPC00091;epimerase_racemaseHHPC00096;isomeraseHHPC00135;oxidoreductaseHHPC00176;lyaseHHPC00144	none
Solyc01g008560.2	1	0	0	-1	0	0	0	0	-1	0	0	0	0	0	0	1	0	NAD kinase 1 (AHRD V1 **** B6SWV6_MAIZE)%3B contains Interpro domain(s) IPR002504 ATP-NAD/AcoX kinase	FAMILY NOT NAMED	transferase activityHHGO:0016740;nucleotide kinase activityHHGO:0019201;catalytic activityHHGO:0003824;kinase activityHHGO:0016301	polyphosphate catabolic processHHGO:0006798;phosphate-containing compound metabolic processHHGO:0006796;metabolic processHHGO:0008152	cytoplasmHHGO:0005737;intracellularHHGO:0005622	nucleotide kinaseHHPC00172;transferaseHHPC00220;kinaseHHPC00137	none
Solyc01g008580.1	0	0	-1	0	-1	0	0	-1	1	0	0	0	0	0	0	0	-1	Zinc transporter protein (AHRD V1 ***- D5LMF9_9FABA)%3B contains Interpro domain(s) IPR003689 Zinc/iron permease ;_Length	ZINC_IRON TRANSPORTER	transmembrane transporter activityHHGO:0022857;transporter activityHHGO:0005215;cation transmembrane transporter activityHHGO:0008324	localizationHHGO:0051179;cation transportHHGO:0006812;cellular processHHGO:0009987;ion transportHHGO:0006811;transportHHGO:0006810	cell partHHGO:0044464;membraneHHGO:0016020;plasma membraneHHGO:0005886	transporterHHPC00227;transmembrane receptor regulatory_adaptor proteinHHPC00226	none
Solyc01g008590.1	0	0	0	0	0	0	0	-1	1	0	0	0	0	0	0	0	0	Zinc transporter protein (AHRD V1 *-*- C0L438_9MAGN)%3B contains Interpro domain(s) IPR003689 Zinc/iron permease ;_Length	ZINC_IRON TRANSPORTER	transmembrane transporter activityHHGO:0022857;transporter activityHHGO:0005215;cation transmembrane transporter activityHHGO:0008324	localizationHHGO:0051179;cation transportHHGO:0006812;cellular processHHGO:0009987;ion transportHHGO:0006811;transportHHGO:0006810	cell partHHGO:0044464;membraneHHGO:0016020;plasma membraneHHGO:0005886	transporterHHPC00227;transmembrane receptor regulatory_adaptor proteinHHPC00226	none
Solyc01g008600.2	0	0	0	1	0	0	0	0	0	0	0	0	0	0	0	0	0	Zinc finger CCCH domain-containing protein 53 (AHRD V1 ***- C3H53_ORYSJ)%3B contains Interpro domain(s) IPR000571 Zinc finger%2C CCCH-type	FAMILY NOT NAMED	nucleic acid bindingHHGO:0003676;RNA bindingHHGO:0003723;bindingHHGO:0005488	none	ribonucleoprotein complexHHGO:0030529	ribonucleoproteinHHPC00201;RNA binding proteinHHPC00031;nucleic acid bindingHHPC00171	none
Solyc01g008640.2	1	0	0	0	0	0	-1	0	-1	0	0	0	0	0	0	0	0	Cytochrome P450	FAMILY NOT NAMED	oxidoreductase activityHHGO:0016491;catalytic activityHHGO:0003824	biosynthetic processHHGO:0009058;secondary metabolic processHHGO:0019748;metabolic processHHGO:0008152	none	oxygenaseHHPC00177;oxidoreductaseHHPC00176	none
Solyc01g008660.2	0	0	-1	0	0	0	0	0	0	0	0	0	0	0	0	0	0	F-box family protein (AHRD V1 ***- B9HCS6_POPTR)%3B contains Interpro domain(s) IPR001810 Cyclin-like F-box	FAMILY NOT NAMED	none	none	none	none	none
Solyc01g008680.2	1	0	1	0	0	0	0	0	0	0	-1	0	0	0	0	0	0	S2 self-incompatibility locus-linked pollen 3.2 protein (AHRD V1 ***- Q7XAE8_PETIN)	FAMILY NOT NAMED	none	none	none	none	none
Solyc01g008700.2	0	0	0	0	0	0	0	0	0	0	0	0	0	0	0	0	0	cDNA clone 001-102-C05 full insert sequence (AHRD V1 **-- B7E7M9_ORYSJ)	FAMILY NOT NAMED	none	none	none	none	none
Solyc01g008710.2	1	1	1	-1	-1	0	0	0	0	1	-1	1	-1	0	-1	0	-1	Mannan endo-1 4-beta-mannosidase (AHRD V1 ***- D2S259_HALTV)%3B contains Interpro domain(s) IPR018087 Glycoside hydrolase%2C family 5%2C conserved site IPR013781 Glycoside hydrolase%2C subgroup%2C catalytic core	FAMILY NOT NAMED	hydrolase activityHHGO:0016787;hydrolase activity, hydrolyzing O-glycosyl compoundsHHGO:0004553;catalytic activityHHGO:0003824	catabolic processHHGO:0009056;polysaccharide metabolic processHHGO:0005976;cellular processHHGO:0009987;carbohydrate metabolic processHHGO:0005975;primary metabolic processHHGO:0044238;metabolic processHHGO:0008152	none	none	none
Solyc01g008720.1	1	1	1	-1	0	0	-1	0	-1	0	-1	0	-1	0	0	1	0	Mannan endo-1 4-beta-mannosidase (AHRD V1 ***- A8FDC6_BACP2)%3B contains Interpro domain(s) IPR001547 Glycoside hydrolase%2C family 5 ;_Length	FAMILY NOT NAMED	hydrolase activityHHGO:0016787;hydrolase activity, hydrolyzing O-glycosyl compoundsHHGO:0004553;catalytic activityHHGO:0003824	catabolic processHHGO:0009056;polysaccharide metabolic processHHGO:0005976;cellular processHHGO:0009987;carbohydrate metabolic processHHGO:0005975;primary metabolic processHHGO:0044238;metabolic processHHGO:0008152	none	none	none
Solyc01g008730.2	0	0	0	0	0	0	0	0	0	0	0	0	0	0	0	0	0	BZIP transcription factor (AHRD V1 **** Q9SQK1_TOBAC)%3B contains Interpro domain(s) IPR011616 bZIP transcription factor%2C bZIP-1	CAMP-RESPONSE ELEMENT BINDING PROTEIN-RELATED	none	developmental processHHGO:0032502	none	none	none
Solyc01g008750.1	0	0	0	0	0	0	1	0	0	0	0	0	0	0	0	0	0	cDNA clone J013074B07 full insert sequence (AHRD V1 *--- B7ECA1_ORYSJ)%3B contains Interpro domain(s) IPR004332 Transposase%2C MuDR%2C plant ;_Length	FAMILY NOT NAMED	none	mitosisHHGO:0007067	none	none	none
Solyc01g008760.2	1	0	1	0	0	0	-1	-1	0	0	0	0	0	0	-1	1	0	Genomic DNA chromosome 5 P1 clone MUB3 (AHRD V1 *-*- Q9FLF2_ARATH)	FAMILY NOT NAMED	none	none	none	none	none
Solyc01g008770.2	0	-1	0	0	0	0	0	0	0	0	0	0	0	0	0	0	0	Rho GTPase activating protein 12 (AHRD V1 *--* Q6P4P5_DANRE)%3B contains Interpro domain(s) IPR000198 RhoGAP	RHO_RAC_CDC GTPASE-ACTIVATING PROTEIN	GTPase activityHHGO:0003924;pyrophosphatase activityHHGO:0016462;hydrolase activityHHGO:0016787;catalytic activityHHGO:0003824	regulation of biological processHHGO:0050789;regulation of phosphate metabolic processHHGO:0019220;regulation of molecular functionHHGO:0065009;nitrogen compound metabolic processHHGO:0006807;regulation of nucleobase-containing compound metabolic processHHGO:0019219;biological regulationHHGO:0065007;catabolic processHHGO:0009056;cellular processHHGO:0009987;regulation of catalytic activityHHGO:00…	cytoplasmHHGO:0005737;cell partHHGO:0044464;intracellularHHGO:0005622	G-protein modulatorHHPC00022;enzyme modulatorHHPC00095	AngiogenesisHHP00005 RacHHP00245;VEGF signaling pathwayHHP00056 RacHHP01421;Cytoskeletal regulation by Rho GTPaseHHP00016 Rho GAPsHHP00520;PDGF signaling pathwayHHP00047 RhoHHP01174
Solyc01g008780.2	-1	-1	0	0	0	0	0	0	0	0	0	0	0	0	0	1	0	Phospholipase A22 (AHRD V1 ***- B9SJ74_RICCO)%3B contains Interpro domain(s) IPR016090 Phospholipase A2	FAMILY NOT NAMED	none	none	none	none	none
Solyc01g008790.2	1	-1	1	0	-1	0	-1	0	-1	0	0	0	0	0	0	1	0	Phosphoesterase family protein (AHRD V1 ***- D7LEV5_ARALY)%3B contains Interpro domain(s) IPR007312 Phosphoesterase	FAMILY NOT NAMED	none	none	none	none	none
Solyc01g008800.1	0	0	0	0	0	0	1	0	0	0	0	0	0	0	0	0	0	Tir-nbs-lrr%2C resistance protein	LEUCINE-RICH REPEAT-CONTAINING PROTEIN	none	none	none	none	none
Solyc01g008810.2	1	0	0	0	0	0	0	0	0	0	0	0	0	0	0	0	0	Zinc finger family protein (AHRD V1 **-- D7LZ79_ARALY)%3B contains Interpro domain(s) IPR018957 Zinc finger%2C C3HC4 RING-type	RING FINGER CONTAINING PROTEIN	ligase activityHHGO:0016874;ubiquitin-protein ligase activityHHGO:0004842;catalytic activityHHGO:0003824	protein transportHHGO:0015031;proteolysisHHGO:0006508;transportHHGO:0006810;vesicle-mediated transportHHGO:0016192;intracellular protein transportHHGO:0006886;protein metabolic processHHGO:0019538;metabolic processHHGO:0008152;primary metabolic processHHGO:0044238	none	ubiquitin-protein ligaseHHPC00234;ligaseHHPC00142	none
Solyc01g008820.2	0	0	0	0	0	0	0	0	0	0	0	0	0	0	0	0	0	Signal peptide peptidase family protein (AHRD V1 ***- D7LQE4_ARALY)%3B contains Interpro domain(s) IPR007369 Peptidase A22B%2C signal peptide peptidase	SIGNAL PEPTIDE PEPTIDASE	none	none	none	none	none
Solyc01g008840.2	0	0	0	0	0	0	0	0	0	0	0	0	0	0	0	0	0	COP9 signalosome complex subunit 2 (AHRD V1 ***- B6TIW9_MAIZE)%3B contains Interpro domain(s) IPR013143 PCI/PINT associated module	26S PROTEASOME NON-ATPASE REGULATORY SUBUNIT 11_COP9 SIGNALOSOME COMPLEX SUBUNIT 2	none	protein targetingHHGO:0006605;cell cycleHHGO:0007049;intracellular protein transportHHGO:0006886;cellular processHHGO:0009987;protein transportHHGO:0015031;transportHHGO:0006810	none	none	none
Solyc01g008850.2	1	0	0	0	0	0	-1	0	-1	0	0	0	0	0	0	0	0	CBL-interacting protein kinase 18 (AHRD V1 ***- C4P7W7_VITVI)%3B contains Interpro domain(s) IPR002290 Serine/threonine protein kinase	SERINE_THREONINE KINASE	transferase activityHHGO:0016740;catalytic activityHHGO:0003824;kinase activityHHGO:0016301;protein kinase activityHHGO:0004672	regulation of biological processHHGO:0050789;response to stimulusHHGO:0050896;signal transductionHHGO:0007165;biological regulationHHGO:0065007;cell communicationHHGO:0007154;protein phosphorylationHHGO:0006468;intracellular signal transductionHHGO:0035556;cellular processHHGO:0009987;protein metabolic processHHGO:0019538;cellular protein modification processHHGO:0006464;primary metabolic process…	cytoplasmHHGO:0005737;cell partHHGO:0044464;intracellularHHGO:0005622	non-receptor serine_threonine protein kinaseHHPC00167;protein kinaseHHPC00193;transferaseHHPC00220;kinaseHHPC00137	none
Solyc01g008860.1	1	1	1	-1	0	0	1	1	1	0	-1	0	-1	0	0	0	0	ATP binding / serine-threonine kinase (AHRD V1 **** C5DB71_VITVI)%3B contains Interpro domain(s) IPR002290 Serine/threonine protein kinase	FAMILY NOT NAMED	none	none	none	none	none
Solyc01g008870.1	1	1	1	-1	0	0	1	0	1	0	0	0	0	0	0	0	0	ATP binding / serine-threonine kinase (AHRD V1 **** C5DB71_VITVI)%3B contains Interpro domain(s) IPR002290 Serine/threonine protein kinase	FAMILY NOT NAMED	none	none	none	none	none
Solyc01g008880.1	0	0	-1	0	0	0	-1	0	-1	0	0	0	0	0	0	0	0	Ethylene responsive transcription factor 1b (AHRD V1 *-*- C0J9I8_9ROSA)%3B contains Interpro domain(s) IPR001471 Pathogenesis-related transcriptional factor and ERF%2C DNA-binding	FAMILY NOT NAMED	none	none	none	none	none
Solyc01g008890.2	0	0	0	0	0	0	0	0	0	0	0	0	0	0	0	0	0	Ethylene responsive transcription factor 2a (AHRD V1 *-*- C0J9I7_9ROSA)%3B contains Interpro domain(s) IPR001471 Pathogenesis-related transcriptional factor and ERF%2C DNA-binding	FAMILY NOT NAMED	none	none	none	none	none
Solyc01g008900.2	0	0	0	0	0	0	0	0	0	0	0	0	0	0	0	0	0	Genomic DNA chromosome 3 P1 clone MJL14 (AHRD V1 **-- Q9LJG2_ARATH)%3B contains Interpro domain(s) IPR001926 Pyridoxal phosphate-dependent enzyme%2C beta subunit	FAMILY NOT NAMED	lyase activityHHGO:0016829;bindingHHGO:0005488;catalytic activityHHGO:0003824	metabolic processHHGO:0008152	cytoplasmHHGO:0005737;cell partHHGO:0044464;intracellularHHGO:0005622	dehydrataseHHPC00091;deaminaseHHPC00088;epimerase_racemaseHHPC00096;isomeraseHHPC00135;lyaseHHPC00144;hydrolaseHHPC00121	none
Solyc01g008910.2	0	0	-1	0	1	0	0	0	0	0	-1	0	0	0	0	0	0	Scarecrow transcription factor family protein (AHRD V1 **-* D7MIP9_ARALY)%3B contains Interpro domain(s) IPR005202 GRAS transcription factor	FAMILY NOT NAMED	nucleic acid bindingHHGO:0003676;nucleic acid binding transcription factor activityHHGO:0001071;sequence-specific DNA binding transcription factor activityHHGO:0003700;bindingHHGO:0005488;DNA bindingHHGO:0003677	regulation of biological processHHGO:0050789;transcription, DNA-dependentHHGO:0006351;RNA metabolic processHHGO:0016070;nitrogen compound metabolic processHHGO:0006807;regulation of nucleobase-containing compound metabolic processHHGO:0019219;biological regulationHHGO:0065007;biosynthetic processHHGO:0009058;cellular processHHGO:0009987;nucleobase-containing compound metabolic processHHGO:0006139…	cell partHHGO:0044464;organelleHHGO:0043226;nucleusHHGO:0005634;intracellularHHGO:0005622	none	none
Solyc01g008920.2	1	1	0	0	0	0	0	0	0	0	0	0	0	0	0	0	0	NAD dependent epimerase/dehydratase family protein expressed (AHRD V1 **-- Q10L97_ORYSJ)%3B contains Interpro domain(s) IPR013120 Male sterility%2C NAD-binding	NAD DEPENDENT EPIMERASE_DEHYDRATASE	lyase activityHHGO:0016829;isomerase activityHHGO:0016853;racemase and epimerase activityHHGO:0016854;catalytic activityHHGO:0003824;oxidoreductase activityHHGO:0016491;hydro-lyase activityHHGO:0016836	lipid metabolic processHHGO:0006629;polysaccharide metabolic processHHGO:0005976;steroid metabolic processHHGO:0008202;glycogen metabolic processHHGO:0005977;cholesterol metabolic processHHGO:0008203;carbohydrate metabolic processHHGO:0005975;primary metabolic processHHGO:0044238;metabolic processHHGO:0008152	none	dehydrataseHHPC00091;epimerase_racemaseHHPC00096;isomeraseHHPC00135;oxidoreductaseHHPC00176;lyaseHHPC00144	none
Solyc01g008930.2	-1	-1	-1	0	0	0	0	0	0	0	0	0	0	0	1	0	0	Phycoerythrobilin ferredoxin oxidoreductase (AHRD V1 **** Q6E5A3_MAIZE)%3B contains Interpro domain(s) IPR009249 Ferredoxin-dependent bilin reductase	FAMILY NOT NAMED	none	none	none	none	none
Solyc01g008940.2	-1	-1	-1	1	0	0	0	0	0	0	0	0	0	0	0	0	0	Anther protein (AHRD V1 ***- Q8RX90_TOBAC)	#N/A	#N/A	#N/A	#N/A	#N/A	#N/A
Solyc01g008950.2	0	0	0	0	0	0	0	0	0	0	0	0	0	0	0	0	0	Calmodulin 5/6/7/8-like protein (AHRD V1 ***- Q3HVL6_SOLTU)%3B contains Interpro domain(s) IPR011992 EF-Hand type	CALCIUM BINDING PROTEIN	calcium ion bindingHHGO:0005509;protein bindingHHGO:0005515;calmodulin bindingHHGO:0005516;bindingHHGO:0005488	cell cycleHHGO:0007049;intracellular signal transductionHHGO:0035556;cellular processHHGO:0009987	none	intracellular calcium-sensing proteinHHPC00131;calmodulinHHPC00061;calcium-binding proteinHHPC00060	none
Solyc01g008960.2	0	0	0	0	0	0	0	0	0	0	0	0	0	0	0	0	0	Argonaute 4-like protein (AHRD V1 ***- D5FQ91_PELHO)%3B contains Interpro domain(s) IPR003165 Stem cell self-renewal protein Piwi	EUKARYOTIC TRANSLATION INITIATION FACTOR 2C	none	none	none	none	none
Solyc01g008970.2	0	0	0	0	0	0	0	0	0	0	0	0	0	0	0	0	0	Heterogeneous nuclear ribonucleoprotein A3-like protein 2 (AHRD V1 *--- B6TV58_MAIZE)%3B contains Interpro domain(s) IPR000504 RNA recognition motif%2C RNP-1	RNA BINDING PROTEIN	none	none	none	none	none
Solyc01g008980.2	0	0	0	0	0	0	0	0	0	0	0	0	0	0	0	0	0	BZIP transcription factor (AHRD V1 **-- Q32WR6_MALDO)%3B contains Interpro domain(s) IPR011616 bZIP transcription factor%2C bZIP-1	CAMP-RESPONSE ELEMENT BINDING PROTEIN-RELATED	none	none	none	none	none
Solyc01g008990.2	0	0	0	0	0	0	0	0	0	0	0	0	0	0	0	0	0	THO complex subunit 7 homolog (AHRD V1 ***- B5XFL3_SALSA)%3B contains Interpro domain(s) IPR018018 Tho complex subunit 7	MAINTENANCE OF KILLER 16 MAK16 PROTEIN-RELATED	none	none	none	none	none
Solyc01g009000.2	0	0	0	0	0	0	0	0	0	0	0	0	0	0	0	0	0	RING finger protein 6 (AHRD V1 *--- RNF6_HUMAN)%3B contains Interpro domain(s) IPR018957 Zinc finger%2C C3HC4 RING-type	RING ZINC FINGER PROTEIN	none	catabolic processHHGO:0009056;cellular processHHGO:0009987;protein metabolic processHHGO:0019538;primary metabolic processHHGO:0044238;metabolic processHHGO:0008152;proteolysisHHGO:0006508;cellular protein modification processHHGO:0006464	none	none	none
Solyc01g009010.2	0	0	0	-1	0	0	0	0	0	0	0	0	0	0	0	0	0	4-diphosphocytidyl-2-C-methyl-D-erythritol kinase (AHRD V1 ***- A4USB3_NICBE)%3B contains Interpro domain(s) IPR004424 4-diphosphocytidyl-2C-methyl-D-erythritol kinase	FAMILY NOT NAMED	transferase activityHHGO:0016740;amino acid kinase activityHHGO:0019202;catalytic activityHHGO:0003824;kinase activityHHGO:0016301	none	none	amino acid kinaseHHPC00045;transferaseHHPC00220;kinaseHHPC00137	none
Solyc01g009020.2	0	-1	0	0	-1	0	-1	0	0	0	0	0	0	0	0	1	0	Cysteine proteinase inhibitor (AHRD V1 **** Q2VY67_9ERIC)%3B contains Interpro domain(s) IPR000010 Proteinase inhibitor I25%2C cystatin	CYSTATIN FAMILY MEMBER	cysteine-type endopeptidase inhibitor activityHHGO:0004869;protein bindingHHGO:0005515;enzyme inhibitor activityHHGO:0004857;peptidase inhibitor activityHHGO:0030414;bindingHHGO:0005488;enzyme regulator activityHHGO:0030234	protein metabolic processHHGO:0019538;primary metabolic processHHGO:0044238;proteolysisHHGO:0006508;metabolic processHHGO:0008152	none	protease inhibitorHHPC00191;enzyme modulatorHHPC00095;cysteine protease inhibitorHHPC00082	none
Solyc01g009030.2	0	0	0	0	0	0	0	0	0	0	0	0	0	0	0	0	0	Nuclear control of ATPase protein (AHRD V1 *--- C9SK53_VERA1)%3B contains Interpro domain(s) IPR013946 Nuclear control of ATP synthase 2	FAMILY NOT NAMED	none	none	none	none	none
Solyc01g009040.2	0	1	0	0	0	0	0	0	0	0	0	0	0	0	0	0	0	Cyclin B1 (AHRD V1 **** Q9LD02_TOBAC)%3B contains Interpro domain(s) IPR014400 Cyclin%2C A/B/D/E	CYCLINE	protein bindingHHGO:0005515;enzyme activator activityHHGO:0008047;kinase regulator activityHHGO:0019207;bindingHHGO:0005488;enzyme regulator activityHHGO:0030234;kinase activator activityHHGO:0019209	cell cycleHHGO:0007049;mitosisHHGO:0007067;cellular processHHGO:0009987	none	kinase modulatorHHPC00140;enzyme modulatorHHPC00095;kinase activatorHHPC00138	none
Solyc01g009050.2	0	0	0	0	0	0	0	0	0	0	0	0	0	0	0	0	0	Molybdenum cofactor biosynthesis protein (AHRD V1 ***- Q309F9_MAIZE)%3B contains Interpro domain(s) IPR005110 MoeA%2C N-terminal%2C domain I and II	MOLYBDOPTERIN BIOSYNTHESIS PROTEIN	none	coenzyme metabolic processHHGO:0006732;nitrogen compound metabolic processHHGO:0006807;prosthetic group metabolic processHHGO:0051189;biosynthetic processHHGO:0009058;cellular processHHGO:0009987;protein metabolic processHHGO:0019538;phosphate-containing compound metabolic processHHGO:0006796;metabolic processHHGO:0008152;cellular protein modification processHHGO:0006464;primary metabolic process…	cytoplasmHHGO:0005737;cell partHHGO:0044464;intracellularHHGO:0005622	none	none
Solyc01g009060.2	0	0	0	0	0	0	0	0	0	0	0	0	0	0	0	0	0	BTB/POZ domain containing protein expressed (AHRD V1 ***- Q10C73_ORYSJ)%3B contains Interpro domain(s) IPR013089 Kelch related	NUCLEAR FACTOR ERYTHROID 2-RELATED FACTOR	none	none	none	none	none
Solyc01g009070.2	-1	-1	0	0	0	0	0	0	0	0	0	0	0	0	0	0	0	MYB transcription factor (AHRD V1 **-* Q9FR97_ARATH)%3B contains Interpro domain(s) IPR015495 Myb transcription factor	MYB-LIKE DNA-BINDING PROTEIN MYB	nucleic acid bindingHHGO:0003676;sequence-specific DNA binding transcription factor activityHHGO:0003700;bindingHHGO:0005488;DNA bindingHHGO:0003677	transcription, DNA-dependentHHGO:0006351;regulation of transcription from RNA polymerase II promoterHHGO:0006357;RNA metabolic processHHGO:0016070;rRNA metabolic processHHGO:0016072;apoptotic processHHGO:0006915;cellular amino acid biosynthetic processHHGO:0008652;purine nucleobase metabolic processHHGO:0006144;cell cycleHHGO:0007049;cellular amino acid metabolic processHHGO:0006520;cellular proc…	none	DNA binding proteinHHPC00009;transcription factorHHPC00218;nucleic acid bindingHHPC00171	none
Solyc01g009090.2	0	0	0	0	0	0	0	0	0	0	0	0	0	0	0	0	0	Serrate RNA effector molecule homolog (AHRD V1 *-*- SRRT_DROWI)	ARSENITE-RESISTANCE PROTEIN 2	none	response to stimulusHHGO:0050896;response to toxic substanceHHGO:0009636	none	none	none
Solyc01g009100.2	0	0	0	0	0	0	0	0	0	0	0	0	0	0	0	0	0	Ribosomal protein L30 (AHRD V1 ***- B3TLP4_ELAGV)%3B contains Interpro domain(s) IPR000231 Ribosomal protein L30e	RIBOSOMAL PROTEIN L30	structural constituent of ribosomeHHGO:0003735;nucleic acid bindingHHGO:0003676;RNA bindingHHGO:0003723;structural molecule activityHHGO:0005198;bindingHHGO:0005488	biosynthetic processHHGO:0009058;cellular processHHGO:0009987;protein metabolic processHHGO:0019538;translationHHGO:0006412;metabolic processHHGO:0008152;primary metabolic processHHGO:0044238	cytoplasmHHGO:0005737;cell partHHGO:0044464;ribonucleoprotein complexHHGO:0030529;intracellularHHGO:0005622;macromolecular complexHHGO:0032991;cytosolHHGO:0005829;organelleHHGO:0043226;ribosomeHHGO:0005840	ribosomal proteinHHPC00202;RNA binding proteinHHPC00031;nucleic acid bindingHHPC00171	none
Solyc01g009110.2	0	0	0	0	0	0	0	0	0	0	0	0	0	0	0	0	0	Histone deacetylase family protein expressed (AHRD V1 ***- Q2QWU2_ORYSJ)%3B contains Interpro domain(s) IPR000286 Histone deacetylase superfamily	HISTONE DEACETYLASE	hydrolase activityHHGO:0016787;nucleic acid bindingHHGO:0003676;deacetylase activityHHGO:0019213;bindingHHGO:0005488;catalytic activityHHGO:0003824;oxidoreductase activityHHGO:0016491	cell cycleHHGO:0007049;transcription, DNA-dependentHHGO:0006351;regulation of transcription from RNA polymerase II promoterHHGO:0006357;cellular processHHGO:0009987;transcription from RNA polymerase II promoterHHGO:0006366;nucleobase-containing compound metabolic processHHGO:0006139;metabolic processHHGO:0008152;primary metabolic processHHGO:0044238	none	deacetylaseHHPC00087;reductaseHHPC00198;oxidoreductaseHHPC00176;nucleic acid bindingHHPC00171;hydrolaseHHPC00121	none
Solyc01g009120.2	0	0	0	0	0	0	0	0	0	0	0	0	0	0	0	0	0	Histone deacetylase family protein expressed (AHRD V1 ***- Q2QWU2_ORYSJ)%3B contains Interpro domain(s) IPR000286 Histone deacetylase superfamily	#N/A	#N/A	#N/A	#N/A	#N/A	#N/A
Solyc01g009140.1	1	1	0	0	0	0	0	0	0	0	-1	0	-1	0	0	0	-1	Dicer-like protein (AHRD V1 ***- B9HHX6_POPTR)	#N/A	#N/A	#N/A	#N/A	#N/A	#N/A
Solyc01g009150.2	0	0	0	0	0	0	0	0	0	0	0	0	0	0	0	0	0	Glycosyl hydrolase (Fragment) (AHRD V1 *-*- D9ZCE7_9CARY)	FAMILY NOT NAMED	none	none	none	none	none
Solyc01g009160.2	0	-1	0	0	0	0	0	0	0	0	0	0	0	0	0	0	0	Harpin-induced protein-like (Fragment) (AHRD V1 **-- D2CFH8_COFAR)%3B contains Interpro domain(s) IPR010847 Harpin-induced 1	FAMILY NOT NAMED	none	none	none	none	none
Solyc01g009170.2	0	0	0	0	0	0	0	0	0	0	0	0	0	0	0	0	0	Ethylene insensitive 3 class transcription factor (AHRD V1 **** D5L146_MALDO)%3B contains Interpro domain(s) IPR006957 Ethylene insensitive 3	FAMILY NOT NAMED	none	none	none	none	none
Solyc01g009180.2	0	0	0	0	0	0	0	0	0	0	0	0	0	0	0	0	0	5-methyltetrahydropteroyltriglutamate--homocysteine methyltransferase (AHRD V1 ***- B6UF55_MAIZE)%3B contains Interpro domain(s) IPR006276 5-methyltetrahydropteroyltriglutamate--homocysteine S-methyltransferase	5-METHYLTETRAHYDROPTEROYLTRIGLUTAMATE--HOMOCYSTEINE METHYLTRANSFERASE	methyltransferase activityHHGO:0008168;transferase activityHHGO:0016740;catalytic activityHHGO:0003824	cellular amino acid metabolic processHHGO:0006520;biosynthetic processHHGO:0009058;sulfur compound metabolic processHHGO:0006790;cellular processHHGO:0009987;nitrogen compound metabolic processHHGO:0006807;metabolic processHHGO:0008152;primary metabolic processHHGO:0044238;cellular amino acid biosynthetic processHHGO:0008652	cytoplasmHHGO:0005737;cell partHHGO:0044464;cytosolHHGO:0005829;intracellularHHGO:0005622	transferaseHHPC00220;methyltransferaseHHPC00155	none
Solyc01g009190.1	1	0	0	0	1	0	0	0	0	0	0	0	0	0	0	0	0	Double-stranded RNA binding protein (AHRD V1 *-** A9T6E4_PHYPA)%3B contains Interpro domain(s) IPR001159 Double-stranded RNA binding	EUKARYOTE SPECIFIC DSRNA BINDING PROTEIN	none	localizationHHGO:0051179;RNA localizationHHGO:0006403	none	none	none
Solyc01g009230.2	0	0	0	0	0	0	0	0	0	-1	-1	0	-1	0	0	0	0	Xanthine dehydrogenase/oxidase (AHRD V1 ***- A9YL93_RABIT)%3B contains Interpro domain(s) IPR016208 Aldehyde oxidase/xanthine dehydrogenase	XANTHINE DEHYDROGENASE	nucleotide bindingHHGO:0000166;bindingHHGO:0005488;catalytic activityHHGO:0003824;oxidoreductase activityHHGO:0016491	purine nucleobase metabolic processHHGO:0006144;catabolic processHHGO:0009056;cellular processHHGO:0009987;nucleobase-containing compound metabolic processHHGO:0006139;nitrogen compound metabolic processHHGO:0006807;metabolic processHHGO:0008152;primary metabolic processHHGO:0044238	cytoplasmHHGO:0005737;cell partHHGO:0044464;cytosolHHGO:0005829;intracellularHHGO:0005622	oxidaseHHPC00175;dehydrogenaseHHPC00092;oxidoreductaseHHPC00176	none
Solyc01g009240.2	1	1	0	0	1	0	0	0	0	0	0	0	0	0	0	0	0	Beta-D-glucosidase (AHRD V1 ***- O82074_TROMA)%3B contains Interpro domain(s) IPR001764 Glycoside hydrolase%2C family 3%2C N-terminal	PERIPLASMIC BETA-GLUCOSIDASE-RELATED	hydrolase activityHHGO:0016787;glucosidase activityHHGO:0015926;hydrolase activity, hydrolyzing O-glycosyl compoundsHHGO:0004553;catalytic activityHHGO:0003824	catabolic processHHGO:0009056;polysaccharide metabolic processHHGO:0005976;carbohydrate metabolic processHHGO:0005975;primary metabolic processHHGO:0044238;metabolic processHHGO:0008152	cell partHHGO:0044464;membraneHHGO:0016020;plasma membraneHHGO:0005886	glucosidaseHHPC00108;hydrolaseHHPC00121	none
Solyc01g009280.2	0	0	0	0	0	0	0	0	0	0	0	0	0	0	0	0	0	Serine/threonine-protein phosphatase (AHRD V1 **** D7LGU6_ARALY)%3B contains Interpro domain(s) IPR012391 Serine/threonine protein phosphatase%2C BSU1	SERINE_THREONINE PROTEIN PHOSPHATASE	hydrolase activityHHGO:0016787;hydrolase activity, acting on ester bondsHHGO:0016788;phosphatase activityHHGO:0016791;calcium ion bindingHHGO:0005509;bindingHHGO:0005488;catalytic activityHHGO:0003824;phosphoprotein phosphatase activityHHGO:0004721	signal transductionHHGO:0007165;transcription, DNA-dependentHHGO:0006351;RNA metabolic processHHGO:0016070;glycogen metabolic processHHGO:0005977;protein phosphorylationHHGO:0006468;cell communicationHHGO:0007154;cellular processHHGO:0009987;transcription from RNA polymerase II promoterHHGO:0006366;nucleobase-containing compound metabolic processHHGO:0006139;cellular protein modification processH…	none	calcium-binding proteinHHPC00060;protein phosphataseHHPC00195;phosphataseHHPC00181;hydrolaseHHPC00121	none
Solyc01g009290.2	0	1	0	0	0	0	0	0	0	0	0	0	0	0	0	0	0	Polyribonucleotide 5%26apos%3B-hydroxyl-kinase Clp1 (AHRD V1 **** CLP1_CHICK)%3B contains Interpro domain(s) IPR010655 Pre-mRNA cleavage complex II Clp1	CLEAVAGE_POLYADENYLATION FACTOR IA SUBUNIT CLP1P	transferase activityHHGO:0016740;catalytic activityHHGO:0003824;kinase activityHHGO:0016301	mRNA 3'-end processingHHGO:0031124;tRNA metabolic processHHGO:0006399;RNA metabolic processHHGO:0016070;nitrogen compound metabolic processHHGO:0006807;mRNA polyadenylationHHGO:0006378;mRNA processingHHGO:0006397;cellular processHHGO:0009987;RNA splicingHHGO:0008380;nucleobase-containing compound metabolic processHHGO:0006139;primary metabolic processHHGO:0044238;phosphate-containing compound met…	cell partHHGO:0044464;organelleHHGO:0043226;nucleusHHGO:0005634;intracellularHHGO:0005622	mRNA polyadenylation factorHHPC00146;mRNA processing factorHHPC00147;RNA binding proteinHHPC00031;nucleic acid bindingHHPC00171	none
Solyc01g009300.2	0	-1	0	0	0	0	0	0	0	0	0	0	0	0	0	0	0	Serine/threonine kinase (AHRD V1 *-** C4QNN2_SCHMA)%3B contains Interpro domain(s) IPR002290 Serine/threonine protein kinase	FAMILY NOT NAMED	transferase activityHHGO:0016740;catalytic activityHHGO:0003824;kinase activityHHGO:0016301;protein kinase activityHHGO:0004672	protein phosphorylationHHGO:0006468;cellular processHHGO:0009987;protein metabolic processHHGO:0019538;phosphate-containing compound metabolic processHHGO:0006796;primary metabolic processHHGO:0044238;cellular protein modification processHHGO:0006464;metabolic processHHGO:0008152	none	protein kinaseHHPC00193;transferaseHHPC00220;kinaseHHPC00137	none
Solyc01g009310.2	0	0	0	0	0	0	0	0	0	0	0	0	0	0	0	0	0	Sterol reductase (AHRD V1 **** A8IA67_CHLRE)%3B contains Interpro domain(s) IPR001171 Ergosterol biosynthesis ERG4/ERG24	STEROL REDUCTASE_LAMIN B RECEPTOR	catalytic activityHHGO:0003824;oxidoreductase activityHHGO:0016491	biological regulationHHGO:0065007;lipid metabolic processHHGO:0006629;steroid metabolic processHHGO:0008202;biosynthetic processHHGO:0009058;metabolic processHHGO:0008152;primary metabolic processHHGO:0044238	cytoplasmHHGO:0005737;nuclear outer membrane-endoplasmic reticulum membrane networkHHGO:0042175;cell partHHGO:0044464;organelleHHGO:0043226;endoplasmic reticulumHHGO:0005783;membraneHHGO:0016020;integral to membraneHHGO:0016021;intracellularHHGO:0005622	reductaseHHPC00198;oxidoreductaseHHPC00176;receptorHHPC00197	none
Solyc01g009320.1	1	1	1	-1	-1	0	1	1	0	0	-1	0	-1	0	-1	0	-1	U-box domain-containing protein 24 (AHRD V1 ***- D7LAS1_ARALY)%3B contains Interpro domain(s) IPR003613 U box domain	WDSAM1 PROTEIN	none	none	none	none	none
Solyc01g009350.2	1	1	0	-1	0	0	0	0	0	0	0	0	0	0	0	0	0	CCR4-NOT transcription complex subunit 7 (AHRD V1 ***- B4FG48_MAIZE)%3B contains Interpro domain(s) IPR006941 Ribonuclease CAF1	CCR4-NOT TRANSCRIPTION COMPLEX SUBUNIT	hydrolase activityHHGO:0016787;hydrolase activity, acting on ester bondsHHGO:0016788;nuclease activityHHGO:0004518;exoribonuclease activityHHGO:0004532;catalytic activityHHGO:0003824	catabolic processHHGO:0009056;RNA catabolic processHHGO:0006401;cellular processHHGO:0009987;nucleobase-containing compound metabolic processHHGO:0006139;RNA metabolic processHHGO:0016070;nitrogen compound metabolic processHHGO:0006807;metabolic processHHGO:0008152;primary metabolic processHHGO:0044238	cell partHHGO:0044464;protein complexHHGO:0043234;intracellularHHGO:0005622;macromolecular complexHHGO:0032991	transcription factorHHPC00218	none
Solyc01g009360.1	1	1	0	-1	0	0	1	1	0	0	0	0	0	0	0	0	0	CCR4-NOT transcription complex subunit 7 (AHRD V1 ***- B4FG48_MAIZE)%3B contains Interpro domain(s) IPR006941 Ribonuclease CAF1	CCR4-NOT TRANSCRIPTION COMPLEX SUBUNIT	hydrolase activityHHGO:0016787;hydrolase activity, acting on ester bondsHHGO:0016788;nuclease activityHHGO:0004518;exoribonuclease activityHHGO:0004532;catalytic activityHHGO:0003824	catabolic processHHGO:0009056;RNA catabolic processHHGO:0006401;cellular processHHGO:0009987;nucleobase-containing compound metabolic processHHGO:0006139;RNA metabolic processHHGO:0016070;nitrogen compound metabolic processHHGO:0006807;metabolic processHHGO:0008152;primary metabolic processHHGO:0044238	cell partHHGO:0044464;protein complexHHGO:0043234;intracellularHHGO:0005622;macromolecular complexHHGO:0032991	transcription factorHHPC00218	none
Solyc01g009380.2	0	-1	0	0	0	0	0	0	0	0	0	0	0	0	0	0	0	Nicalin (AHRD V1 ***- B4FZF8_MAIZE)%3B contains Interpro domain(s) IPR008710 Nicastrin	FAMILY NOT NAMED	none	biological regulationHHGO:0065007;regulation of biological processHHGO:0050789;response to stimulusHHGO:0050896;cell communicationHHGO:0007154;signal transductionHHGO:0007165;cellular processHHGO:0009987	cytoplasmHHGO:0005737;nuclear outer membrane-endoplasmic reticulum membrane networkHHGO:0042175;cell partHHGO:0044464;endoplasmic reticulumHHGO:0005783;organelleHHGO:0043226;membraneHHGO:0016020;intracellularHHGO:0005622	none	none
Solyc01g009390.2	1	0	0	0	0	0	0	0	0	0	0	0	0	0	0	0	0	MRNA decapping enzyme (AHRD V1 *-*- Q45NB8_XENLA)%3B contains Interpro domain(s) IPR010334 Dcp1-like decapping	TRANSCRIPTION FACTOR SMIF DECAPPING ENZYME DCP1	nucleic acid bindingHHGO:0003676;mRNA bindingHHGO:0003729;RNA bindingHHGO:0003723;bindingHHGO:0005488;catalytic activityHHGO:0003824;enzyme regulator activityHHGO:0030234	regulation of biological processHHGO:0050789;regulation of molecular functionHHGO:0065009;RNA metabolic processHHGO:0016070;nitrogen compound metabolic processHHGO:0006807;biological regulationHHGO:0065007;catabolic processHHGO:0009056;RNA catabolic processHHGO:0006401;cellular processHHGO:0009987;regulation of catalytic activityHHGO:0050790;nucleobase-containing compound metabolic processHHGO:00…	cytoplasmHHGO:0005737;cell partHHGO:0044464;organelleHHGO:0043226;ribonucleoprotein complexHHGO:0030529;intracellularHHGO:0005622;macromolecular complexHHGO:0032991	transcription factorHHPC00218;transcription cofactorHHPC00217	TGF-beta signaling pathwayHHP00052 Co-activators corepressorsHHP01282
Solyc01g009420.2	0	0	0	0	0	0	0	0	0	0	0	0	0	0	0	0	0	Bifunctional polymyxin resistance arnA protein (AHRD V1 ***- B6TQB1_MAIZE)%3B contains Interpro domain(s) IPR001509 NAD-dependent epimerase/dehydratase	FAMILY NOT NAMED	lyase activityHHGO:0016829;isomerase activityHHGO:0016853;racemase and epimerase activityHHGO:0016854;catalytic activityHHGO:0003824;oxidoreductase activityHHGO:0016491;hydro-lyase activityHHGO:0016836	lipid metabolic processHHGO:0006629;polysaccharide metabolic processHHGO:0005976;steroid metabolic processHHGO:0008202;glycogen metabolic processHHGO:0005977;cholesterol metabolic processHHGO:0008203;carbohydrate metabolic processHHGO:0005975;primary metabolic processHHGO:0044238;metabolic processHHGO:0008152	none	dehydrataseHHPC00091;epimerase_racemaseHHPC00096;isomeraseHHPC00135;oxidoreductaseHHPC00176;lyaseHHPC00144	none
Solyc01g009430.2	0	0	0	0	0	0	0	0	0	0	0	0	0	0	0	0	0	Os02g0448600 protein (Fragment) (AHRD V1 *--- Q0E1G8_ORYSJ)	FAMILY NOT NAMED	none	none	none	none	none
Solyc01g009450.2	0	0	0	0	0	0	0	0	0	0	0	0	0	0	0	0	0	Mitochondrial inner membrane protease ATP23 (AHRD V1 ***- D0NY32_PHYIN)%3B contains Interpro domain(s) IPR019165 Peptidase M76%2C ATP23	KUB3-PROV PROTEIN	none	none	none	none	none
Solyc01g009480.2	0	0	0	0	0	0	0	0	0	0	0	0	0	0	0	0	0	Hydrolase alpha/beta fold family protein (AHRD V1 **** D7LRW3_ARALY)%3B contains Interpro domain(s) IPR000073 Alpha/beta hydrolase fold-1	ALPHA_BETA HYDROLASE FOLD-CONTAINING PROTEIN	hydrolase activityHHGO:0016787;catalytic activityHHGO:0003824	metabolic processHHGO:0008152	none	serine proteaseHHPC00203;proteaseHHPC00190;hydrolaseHHPC00121	none
Solyc01g009490.1	1	1	1	-1	0	0	0	0	0	0	-1	1	0	0	-1	0	-1	cDNA clone J100026I16 full insert sequence (AHRD V1 **-- B7FA06_ORYSJ)	FAMILY NOT NAMED	none	none	none	none	none
Solyc01g009500.2	0	0	0	0	0	0	0	0	0	0	0	0	0	0	0	0	0	Hydrolase alpha/beta fold family protein (AHRD V1 **** D7LRW3_ARALY)%3B contains Interpro domain(s) IPR000073 Alpha/beta hydrolase fold-1	ALPHA_BETA HYDROLASE FOLD-CONTAINING PROTEIN	hydrolase activityHHGO:0016787;catalytic activityHHGO:0003824	metabolic processHHGO:0008152	none	serine proteaseHHPC00203;proteaseHHPC00190;hydrolaseHHPC00121	none
Solyc01g009510.1	-1	-1	-1	1	1	0	0	0	0	-1	0	0	0	0	0	-1	0	Unknown Protein (AHRD V1)%3B contains Interpro domain(s) IPR011616 bZIP transcription factor%2C bZIP-1 ;_Length	CAMP-RESPONSE ELEMENT BINDING PROTEIN-RELATED	none	none	none	none	none
Solyc01g009520.2	0	1	0	0	0	0	0	0	0	0	0	0	0	0	0	0	0	Ribosomal protein (AHRD V1 ***- Q6ER67_ORYSJ)%3B contains Interpro domain(s) IPR002143 Ribosomal protein L1	RIBOSOMAL PROTEIN L7AE FAMILY MEMBER	none	none	none	none	none
Solyc01g009570.2	0	0	0	0	0	-1	-1	0	-1	0	0	0	0	0	0	0	0	Unknown Protein (AHRD V1)	#N/A	#N/A	#N/A	#N/A	#N/A	#N/A
Solyc01g009610.2	0	0	-1	0	0	0	0	0	0	0	0	0	0	0	0	0	0	Unknown Protein (AHRD V1)	#N/A	#N/A	#N/A	#N/A	#N/A	#N/A
Solyc01g009620.2	0	0	0	0	0	0	0	0	0	0	0	0	0	0	0	0	0	Cleavage and polyadenylation specificity factor subunit 5 (AHRD V1 ***- C1BVK1_9MAXI)%3B contains Interpro domain(s) IPR016706 Cleavage and polyadenylation specificity factor%2C 25 kDa subunit	PRE-MRNA CLEAVAGE FACTOR IM, 25KD SUBUNIT	nucleic acid bindingHHGO:0003676;mRNA bindingHHGO:0003729;RNA bindingHHGO:0003723;bindingHHGO:0005488;catalytic activityHHGO:0003824	mRNA processingHHGO:0006397;RNA splicing, via transesterification reactionsHHGO:0000375;nucleobase-containing compound metabolic processHHGO:0006139;RNA metabolic processHHGO:0016070;mRNA splicing, via spliceosomeHHGO:0000398;metabolic processHHGO:0008152;primary metabolic processHHGO:0044238	none	mRNA processing factorHHPC00147;RNA binding proteinHHPC00031;mRNA splicing factorHHPC00148;nucleic acid bindingHHPC00171	none
Solyc01g009630.2	0	0	0	0	0	0	0	0	0	0	0	0	0	0	0	0	0	Cleavage and polyadenylation specificity factor subunit 5 (AHRD V1 ***- C1BVK1_9MAXI)%3B contains Interpro domain(s) IPR016706 Cleavage and polyadenylation specificity factor%2C 25 kDa subunit	PRE-MRNA CLEAVAGE FACTOR IM, 25KD SUBUNIT	nucleic acid bindingHHGO:0003676;mRNA bindingHHGO:0003729;RNA bindingHHGO:0003723;bindingHHGO:0005488;catalytic activityHHGO:0003824	mRNA processingHHGO:0006397;RNA splicing, via transesterification reactionsHHGO:0000375;nucleobase-containing compound metabolic processHHGO:0006139;RNA metabolic processHHGO:0016070;mRNA splicing, via spliceosomeHHGO:0000398;metabolic processHHGO:0008152;primary metabolic processHHGO:0044238	none	mRNA processing factorHHPC00147;RNA binding proteinHHPC00031;mRNA splicing factorHHPC00148;nucleic acid bindingHHPC00171	none
Solyc01g009640.1	1	1	1	-1	0	-1	0	0	0	0	-1	1	0	0	-1	0	-1	Polygalacturonase (AHRD V1 ***- C0JAE6_9ORYZ)%3B contains Interpro domain(s) IPR012334 Pectin lyase fold ;_Length	FAMILY NOT NAMED	none	none	none	none	none
Solyc01g009670.2	-1	0	0	0	0	0	0	0	0	0	0	0	0	0	0	0	0	CCA-adding enzyme (AHRD V1 *-*- CCA_STAES)%3B contains Interpro domain(s) IPR002646 Polynucleotide adenylyltransferase region	FAMILY NOT NAMED	nucleic acid bindingHHGO:0003676;mRNA bindingHHGO:0003729;RNA bindingHHGO:0003723;transferase activityHHGO:0016740;poly(A) RNA bindingHHGO:0008143;bindingHHGO:0005488;catalytic activityHHGO:0003824;nucleotidyltransferase activityHHGO:0016779	mRNA processingHHGO:0006397;mRNA polyadenylationHHGO:0006378;mRNA 3'-end processingHHGO:0031124;nucleobase-containing compound metabolic processHHGO:0006139;RNA metabolic processHHGO:0016070;metabolic processHHGO:0008152;primary metabolic processHHGO:0044238	none	mRNA polyadenylation factorHHPC00146;mRNA processing factorHHPC00147;transferaseHHPC00220;RNA binding proteinHHPC00031;nucleotidyltransferaseHHPC00174;nucleic acid bindingHHPC00171	none
Solyc01g009730.1	1	1	1	-1	0	1	1	0	1	0	-1	0	-1	0	0	0	-1	Unknow protein (AHRD V1 *-*- Q5W7C9_ORYSJ)%3B contains Interpro domain(s) IPR010399 Tify	FAMILY NOT NAMED	none	none	none	none	none
Solyc01g009740.1	1	1	1	-1	0	0	0	1	-1	0	-1	0	-1	0	-1	0	-1	Unknown Protein (AHRD V1)%3B contains Interpro domain(s) IPR010399 Tify	FAMILY NOT NAMED	protein bindingHHGO:0005515;protein binding transcription factor activityHHGO:0000988;transcription factor binding transcription factor activityHHGO:0000989;bindingHHGO:0005488;transcription cofactor activityHHGO:0003712	regulation of biological processHHGO:0050789;response to stimulusHHGO:0050896;response to endogenous stimulusHHGO:0009719;signal transductionHHGO:0007165;response to stressHHGO:0006950;RNA metabolic processHHGO:0016070;nitrogen compound metabolic processHHGO:0006807;regulation of nucleobase-containing compound metabolic processHHGO:0019219;biological regulationHHGO:0065007;cell communicationHHGO:…	cell partHHGO:0044464;organelleHHGO:0043226;nucleusHHGO:0005634;intracellularHHGO:0005622	none	none
Solyc01g009750.2	0	-1	1	0	0	0	0	0	0	0	0	0	1	0	0	1	0	Unknown Protein (AHRD V1)	#N/A	#N/A	#N/A	#N/A	#N/A	#N/A
Solyc01g009770.2	1	1	0	-1	0	0	0	0	0	0	-1	0	-1	0	0	0	0	Major ampullate spidroin 2-2 (AHRD V1 *-*- B6TJV0_MAIZE)%3B contains Interpro domain(s) IPR001202 WW/Rsp5/WWP	BOMB_KIRA PROTEINS	none	none	none	none	none
Solyc01g009780.2	0	0	0	0	0	0	0	0	0	0	0	0	0	0	0	0	0	LITAF-domain-containing protein (AHRD V1 ***- Q4U6G1_PEA)%3B contains Interpro domain(s) IPR006629 LPS-induced tumor necrosis factor alpha factor	LIPOPOLYSACCHARIDE-INDUCED TRANSCRIPTION FACTOR REGULATING TUMOR NECROSIS FACTOR ALPHA	none	none	none	none	none
Solyc01g009800.1	1	0	0	0	0	0	0	0	0	0	0	0	0	0	0	0	0	Mutator-like transposase 53847-56139 (AHRD V1 ***- Q9C8V7_ARATH)%3B contains Interpro domain(s) IPR018289 MULE transposase%2C conserved domain ;_Length	#N/A	#N/A	#N/A	#N/A	#N/A	#N/A
Solyc01g009820.2	0	0	1	-1	0	0	0	0	0	0	0	0	0	0	0	0	0	Hydroxyproline-rich glycoprotein family protein (AHRD V1 ***- D7LGA9_ARALY)	FAMILY NOT NAMED	none	none	none	none	none
Solyc01g009830.2	1	1	1	-1	-1	0	0	1	0	1	-1	1	-1	0	0	0	0	UDP-glucuronic acid/UDP-N-acetylgalactosamine transporter (AHRD V1 **** C1BM09_OSMMO)%3B contains Interpro domain(s) IPR004853 Protein of unknown function DUF250	SOLUTE CARRIER FAMILY 35	transmembrane transporter activityHHGO:0022857;transporter activityHHGO:0005215	localizationHHGO:0051179;cellular processHHGO:0009987;nucleobase-containing compound transportHHGO:0015931;transportHHGO:0006810	none	transporterHHPC00227	none
Solyc01g009840.1	0	1	-1	-1	0	0	1	-1	1	0	0	0	0	0	0	-1	-1	GAI-like protein 1 (Fragment) (AHRD V1 **-- A1YWS4_9ROSI)%3B contains Interpro domain(s) IPR005202 GRAS transcription factor	FAMILY NOT NAMED	nucleic acid bindingHHGO:0003676;nucleic acid binding transcription factor activityHHGO:0001071;sequence-specific DNA binding transcription factor activityHHGO:0003700;bindingHHGO:0005488;DNA bindingHHGO:0003677	regulation of biological processHHGO:0050789;transcription, DNA-dependentHHGO:0006351;RNA metabolic processHHGO:0016070;nitrogen compound metabolic processHHGO:0006807;regulation of nucleobase-containing compound metabolic processHHGO:0019219;biological regulationHHGO:0065007;biosynthetic processHHGO:0009058;cellular processHHGO:0009987;nucleobase-containing compound metabolic processHHGO:0006139…	cell partHHGO:0044464;organelleHHGO:0043226;nucleusHHGO:0005634;intracellularHHGO:0005622	none	none
Solyc01g009850.2	0	0	0	0	0	0	0	0	0	0	0	0	0	0	0	0	0	Unknown Protein (AHRD V1)	FAMILY NOT NAMED	none	none	none	none	none
Solyc01g009860.2	1	-1	1	0	-1	0	-1	0	0	0	0	0	0	0	0	1	0	NAC domain transcription factor (AHRD V1 **** Q5DM36_WHEAT)%3B contains Interpro domain(s) IPR003441 No apical meristem (NAM) protein	FAMILY NOT NAMED	none	none	none	none	none
Solyc01g009870.2	-1	-1	0	0	0	0	1	0	0	0	1	0	1	0	0	0	0	Glycerophosphodiester phosphodiesterase GDE1 (AHRD V1 ***- B2WNF5_PYRTR)%3B contains Interpro domain(s) IPR004129 Glycerophosphoryl diester phosphodiesterase	RELATED TO MULTIFUNCTIONAL CYCLIN-DEPENDENT KINASE-RELATED	hydrolase activityHHGO:0016787;hydrolase activity, acting on ester bondsHHGO:0016788;phosphoric diester hydrolase activityHHGO:0008081;catalytic activityHHGO:0003824	lipid metabolic processHHGO:0006629;biological regulationHHGO:0065007;homeostatic processHHGO:0042592;catabolic processHHGO:0009056;phospholipid metabolic processHHGO:0006644;cellular processHHGO:0009987;primary metabolic processHHGO:0044238;phosphate-containing compound metabolic processHHGO:0006796;metabolic processHHGO:0008152	none	lipaseHHPC00143;phosphodiesteraseHHPC00185;phospholipaseHHPC00186;hydrolaseHHPC00121	none
Solyc01g009920.1	1	1	0	0	0	0	0	0	0	0	0	0	0	0	0	0	0	MORC family CW-type zinc finger 3 (AHRD V1 *--- Q0D2C9_XENTR)%3B contains Interpro domain(s) IPR003594 ATP-binding region%2C ATPase-like ;_Length	ZINC FINGER CW-TYPE COILED-COIL DOMAIN PROTEIN 3.	none	none	none	none	none
Solyc01g009950.1	0	1	1	0	1	0	-1	-1	0	0	0	0	0	0	0	0	0	Polyprotein-like related (AHRD V1 ***- Q2AA73_ASPOF)	#N/A	#N/A	#N/A	#N/A	#N/A	#N/A
Solyc01g009970.2	0	0	0	0	0	0	0	0	0	0	0	0	0	0	0	0	0	Amidohydrolase 2 (AHRD V1 ***- Q01SB2_SOLUE)%3B contains Interpro domain(s) IPR006992 Amidohydrolase 2	2-AMINO-3-CARBOXYLMUCONATE-6-SEMIALDEHYDE DECARBOXYLASE	none	none	none	none	none
Solyc01g009990.2	0	0	-1	1	0	0	0	0	0	0	0	0	0	0	0	0	0	Peptidyl-prolyl cis-trans isomerase (AHRD V1 ***- B9RMA5_RICCO)%3B contains Interpro domain(s) IPR002130 Peptidyl-prolyl cis-trans isomerase%2C cyclophilin-type	PEPTIDYL-PROLYL CIS-TRANS ISOMERASE	isomerase activityHHGO:0016853;catalytic activityHHGO:0003824	cellular processHHGO:0009987;protein metabolic processHHGO:0019538;primary metabolic processHHGO:0044238;metabolic processHHGO:0008152;cellular protein modification processHHGO:0006464	none	isomeraseHHPC00135	none
Solyc01g010000.2	0	1	0	0	0	0	0	0	0	0	0	0	-1	0	0	0	0	ACT domain-containing protein (AHRD V1 **-- D7M3X3_ARALY)%3B contains Interpro domain(s) IPR002912 Amino acid-binding ACT	FAMILY NOT NAMED	none	none	none	none	none
Solyc01g010020.2	0	-1	1	0	0	0	0	0	0	0	0	0	0	0	0	1	0	Calmodulin (AHRD V1 ***- B6SJJ2_MAIZE)%3B contains Interpro domain(s) IPR003299 Flagellar calcium-binding protein (calflagin)	EF-HAND CALCIUM-BINDING DOMAIN CONTAINING PROTEIN	calcium ion bindingHHGO:0005509;bindingHHGO:0005488	none	none	intracellular calcium-sensing proteinHHPC00131;calmodulinHHPC00061;signaling moleculeHHPC00207;calcium-binding proteinHHPC00060;enzyme modulatorHHPC00095	none
Solyc01g010030.2	0	0	0	0	0	0	0	0	0	0	0	0	0	0	0	0	0	Receptor-like protein kinase At3g21340 (AHRD V1 *-*- RLK6_ARATH)%3B contains Interpro domain(s) IPR002290 Serine/threonine protein kinase	FAMILY NOT NAMED	none	none	none	none	none
Solyc01g010060.2	1	1	0	0	1	0	-1	-1	0	1	0	0	0	0	0	0	-1	Unknown Protein (AHRD V1)	#N/A	#N/A	#N/A	#N/A	#N/A	#N/A
Solyc01g010080.2	-1	-1	-1	0	0	1	0	0	0	-1	1	0	0	0	0	0	0	Potassium/sodium hyperpolarization-activated cyclic nucleotide-gated channel 4 (AHRD V1 **** HCN4_MOUSE)%3B contains Interpro domain(s) IPR000595 Cyclic nucleotide-binding	VOLTAGE AND LIGAND GATED POTASSIUM CHANNEL	cation channel activityHHGO:0005261;transmembrane transporter activityHHGO:0022857;voltage-gated ion channel activityHHGO:0005244;ion channel activityHHGO:0005216;transporter activityHHGO:0005215;voltage-gated potassium channel activityHHGO:0005249;cation transmembrane transporter activityHHGO:0008324	biological regulationHHGO:0065007;localizationHHGO:0051179;regulation of biological processHHGO:0050789;cation transportHHGO:0006812;cellular processHHGO:0009987;ion transportHHGO:0006811;transportHHGO:0006810	cell partHHGO:0044464;membraneHHGO:0016020;integral to membraneHHGO:0016021;plasma membraneHHGO:0005886	ligand-gated ion channelHHPC00141;ion channelHHPC00133;potassium channelHHPC00188;voltage-gated potassium channelHHPC00242;transporterHHPC00227;cyclic nucleotide-gated ion channelHHPC00080;receptorHHPC00197;voltage-gated ion channelHHPC00241	none
Solyc01g010090.1	1	1	0	0	0	0	0	0	0	0	-1	0	0	0	0	0	-1	Unknown Protein (AHRD V1)	FAMILY NOT NAMED	none	none	none	none	none
Solyc01g010100.1	1	1	0	0	0	0	0	0	0	0	-1	0	0	0	0	0	0	Ulp1 protease family C-terminal catalytic domain containing protein (AHRD V1 ***- Q60D46_SOLDE)%3B contains Interpro domain(s) IPR003653 Peptidase C48%2C SUMO/Sentrin/Ubl1 ;_Length	SENTRIN_SUMO-SPECIFIC PROTEASE	hydrolase activityHHGO:0016787;cysteine-type peptidase activityHHGO:0008234;peptidase activityHHGO:0008233;catalytic activityHHGO:0003824	cellular processHHGO:0009987;protein metabolic processHHGO:0019538;primary metabolic processHHGO:0044238;cellular protein modification processHHGO:0006464;metabolic processHHGO:0008152	cell partHHGO:0044464;organelleHHGO:0043226;nucleusHHGO:0005634;intracellularHHGO:0005622	proteaseHHPC00190;hydrolaseHHPC00121	none
Solyc01g010130.2	-1	0	-1	0	0	0	0	0	0	0	0	0	0	0	0	0	1	Transcription factor (AHRD V1 *-** D6MKM4_9ASPA)%3B contains Interpro domain(s) IPR011598 Helix-loop-helix DNA-binding	STEROL REGULATORY ELEMENT-BINDING PROTEIN	none	none	none	none	none
Solyc01g010140.1	1	1	0	0	0	0	0	0	0	0	-1	0	-1	0	0	0	0	Unknown Protein (AHRD V1)	FAMILY NOT NAMED	none	none	none	none	none
Solyc01g010150.2	1	1	1	-1	0	-1	0	1	-1	0	0	0	0	0	0	0	0	Unknown protein DS12 from 2D-PAGE of leaf%2C chloroplastic (AHRD V1 *--- UP12_ORYSJ)%3B contains Interpro domain(s) IPR002912 Amino acid-binding ACT	FAMILY NOT NAMED	none	none	none	none	none
Solyc01g010190.2	0	0	0	0	0	1	0	0	0	0	0	0	0	0	0	0	0	Unknown Protein (AHRD V1)	#N/A	#N/A	#N/A	#N/A	#N/A	#N/A
Solyc01g010220.2	0	0	0	0	0	0	0	0	0	0	0	0	0	0	0	0	0	Unknown Protein (AHRD V1)	#N/A	#N/A	#N/A	#N/A	#N/A	#N/A
Solyc01g010250.2	0	0	0	0	0	0	0	0	1	0	0	0	0	0	0	0	0	6-phosphogluconolactonase (AHRD V1 ***- B6U0H2_MAIZE)%3B contains Interpro domain(s) IPR005900 6-phosphogluconolactonase	6-PHOSPHOGLUCONOLACTONASE	hydrolase activityHHGO:0016787;catalytic activityHHGO:0003824	monosaccharide metabolic processHHGO:0005996;pentose-phosphate shuntHHGO:0006098;carbohydrate metabolic processHHGO:0005975;primary metabolic processHHGO:0044238;metabolic processHHGO:0008152	none	hydrolaseHHPC00121	none
Solyc01g010270.2	-1	-1	0	0	0	0	0	0	1	0	0	0	0	0	0	0	0	Nitrilase associated protein-like (Fragment) (AHRD V1 *--- Q1HEA6_MUSAC)	FAMILY NOT NAMED	none	none	none	none	none
Solyc01g010280.2	0	0	0	0	0	0	0	0	0	0	0	0	0	0	0	0	0	Unknown Protein (AHRD V1)	FAMILY NOT NAMED	none	none	none	none	none
Solyc01g010290.2	1	0	1	0	0	0	0	0	-1	0	0	0	0	0	0	0	0	Ureide permease 2 (AHRD V1 ***- B6U6B9_MAIZE)%3B contains Interpro domain(s) IPR009834 Fatty acid elongase 3-ketoacyl-CoA synthase 1	FAMILY NOT NAMED	none	none	none	none	none
Solyc01g010300.1	1	1	0	-1	-1	-1	1	0	1	1	0	1	-1	0	0	0	0	MADS-box protein-like (AHRD V1 ***- Q94CT0_ORYSJ)%3B contains Interpro domain(s) IPR002100 Transcription factor%2C MADS-box ;_Length	MADS BOX PROTEIN	none	none	none	none	none
Solyc01g010310.2	0	-1	0	1	0	1	0	0	0	0	0	0	0	0	0	0	0	Glucan endo-1 3-beta-glucosidase 3 (AHRD V1 *-*- B6UAN6_MAIZE)%3B contains Interpro domain(s) IPR012946 X8	FAMILY NOT NAMED	hydrolase activityHHGO:0016787;hydrolase activity, hydrolyzing O-glycosyl compoundsHHGO:0004553;carbohydrate bindingHHGO:0030246;bindingHHGO:0005488;catalytic activityHHGO:0003824	metabolic processHHGO:0008152	cell partHHGO:0044464;membraneHHGO:0016020;plasma membraneHHGO:0005886	none	none
Solyc01g010350.2	1	0	0	0	1	0	0	0	0	0	0	0	0	0	0	1	0	Glucose-6-phosphate/phosphate translocator (AHRD V1 **** Q7XY15_WHEAT)%3B contains Interpro domain(s) IPR004696 Tpt phosphate/phosphoenolpyruvate translocator	SOLUTE CARRIER FAMILY 35	none	none	none	transporterHHPC00227	none
Solyc01g010370.2	1	0	0	0	0	0	0	0	0	0	0	0	0	0	0	0	0	Dehydration-responsive protein-like (AHRD V1 **-- Q653G1_ORYSJ)%3B contains Interpro domain(s) IPR004159 Protein of unknown function DUF248%2C methyltransferase putative	METHYLTRANSFERASE	methyltransferase activityHHGO:0008168;transferase activityHHGO:0016740;catalytic activityHHGO:0003824	metabolic processHHGO:0008152	cytoplasmHHGO:0005737;cell partHHGO:0044464;intracellularHHGO:0005622	transferaseHHPC00220;methyltransferaseHHPC00155	none
Solyc01g010390.2	1	0	0	-1	0	0	1	1	0	0	0	0	0	0	0	1	0	Beta-glucosidase (AHRD V1 ***- D3YJ59_VITVI)%3B contains Interpro domain(s) IPR001360 Glycoside hydrolase%2C family 1	GLYCOSYL HYDROLASE	hydrolase activityHHGO:0016787;glucosidase activityHHGO:0015926;hydrolase activity, hydrolyzing O-glycosyl compoundsHHGO:0004553;catalytic activityHHGO:0003824	metabolic processHHGO:0008152	none	none	none
Solyc01g010410.2	0	0	0	0	0	0	0	0	0	0	0	0	0	0	0	0	0	Cys2/His2 zinc-finger transcription factor (AHRD V1 *-** Q4U316_SILLA)%3B contains Interpro domain(s) IPR007087 Zinc finger%2C C2H2-type	FAMILY NOT NAMED	none	none	cell partHHGO:0044464;organelleHHGO:0043226;nucleusHHGO:0005634;intracellularHHGO:0005622	none	none
Solyc01g010420.2	-1	-1	0	0	0	0	0	0	0	0	1	0	1	0	0	0	0	NPH3 domain containing protein-like (AHRD V1 *-*- Q8GVF8_ORYSJ)%3B contains Interpro domain(s) IPR007679 Protein of unknown function DUF569	FAMILY NOT NAMED	none	none	none	none	none
Solyc01g010430.2	-1	-1	1	1	0	0	0	0	0	0	1	0	1	0	0	1	0	cDNA clone J023121M11 full insert sequence (AHRD V1 **-- B7F743_ORYSJ)%3B contains Interpro domain(s) IPR007679 Protein of unknown function DUF569	FAMILY NOT NAMED	none	none	none	none	none
Solyc01g010440.2	0	1	0	0	0	0	0	0	0	0	0	0	0	0	0	0	0	Unknown Protein (AHRD V1)	FAMILY NOT NAMED	none	none	none	none	none
Solyc01g010460.2	0	0	0	0	0	0	0	0	0	0	0	0	0	0	0	0	0	Unknown Protein (AHRD V1)	#N/A	#N/A	#N/A	#N/A	#N/A	#N/A
Solyc01g010470.2	0	0	0	0	0	0	0	0	0	0	0	0	0	0	0	0	0	Isoamylase N-terminal domain containing protein (AHRD V1 ***- Q6AVV5_ORYSJ)	5'-AMP-ACTIVATED PROTEIN KINASE , BETA SUBUNIT	none	none	none	none	none
Solyc01g010480.2	0	0	0	0	0	0	0	0	0	0	0	0	0	0	0	0	0	Potassium voltage-gated channel subfamily H member 8 (AHRD V1 *--- KCNH8_HUMAN)%3B contains Interpro domain(s) IPR013767 PAS fold	#N/A	#N/A	#N/A	#N/A	#N/A	#N/A
Solyc01g010510.2	0	0	0	0	0	0	0	0	0	0	0	0	0	0	0	-1	0	Pentatricopeptide repeat-containing protein (AHRD V1 ***- D7KPN1_ARALY)%3B contains Interpro domain(s) IPR002885 Pentatricopeptide repeat	FAMILY NOT NAMED	nucleic acid bindingHHGO:0003676;RNA bindingHHGO:0003723;transmembrane transporter activityHHGO:0022857;transferase activityHHGO:0016740;bindingHHGO:0005488;catalytic activityHHGO:0003824;transmembrane receptor protein kinase activityHHGO:0019199;transmembrane receptor protein serine_threonine kinase activityHHGO:0004675;receptor activityHHGO:0004872;transporter activityHHGO:0005215;kinase activi…	intracellular protein transportHHGO:0006886;protein phosphorylationHHGO:0006468;protein metabolic processHHGO:0019538;cellular protein modification processHHGO:0006464;metabolic processHHGO:0008152;transportHHGO:0006810;protein transportHHGO:0015031;primary metabolic processHHGO:0044238	none	protein kinase receptorHHPC00194;protein kinaseHHPC00193;serine_threonine protein kinase receptorHHPC00205;transporterHHPC00227;transferaseHHPC00220;RNA binding proteinHHPC00031;kinaseHHPC00137;receptorHHPC00197;nucleic acid bindingHHPC00171	none
Solyc01g010520.2	0	0	0	0	0	0	0	0	0	0	0	0	0	0	0	0	0	Uncharacterized plant-specific domain TIGR01589 family protein (AHRD V1 ***- Q60CZ4_SOLDE)%3B contains Interpro domain(s) IPR006476 Conserved hypothetical protein CHP01589%2C plant	FAMILY NOT NAMED	none	none	none	none	none
Solyc01g010530.1	1	0	1	0	0	1	-1	0	-1	0	0	0	0	0	0	0	0	Solute carrier family 2%2C facilitated glucose transporter member 3 (AHRD V1 ***- GTR3_RAT)%3B contains Interpro domain(s) IPR003663 Sugar/inositol transporter ;_Length	FAMILY NOT NAMED	transmembrane transporter activityHHGO:0022857;transporter activityHHGO:0005215;cation transmembrane transporter activityHHGO:0008324;carbohydrate transmembrane transporter activityHHGO:0015144	localizationHHGO:0051179;cation transportHHGO:0006812;cellular processHHGO:0009987;carbohydrate transportHHGO:0008643;ion transportHHGO:0006811;transportHHGO:0006810	none	carbohydrate transporterHHPC00067	none
Solyc01g010540.2	0	0	0	0	0	0	0	0	0	0	0	0	0	0	0	0	0	Ribosomal protein (AHRD V1 ***- B3TM27_ELAGV)%3B contains Interpro domain(s) IPR002942 RNA-binding S4 IPR018079 Ribosomal protein S4%2C conserved site IPR001912 Ribosomal protein S4	30S 40S RIBOSOMAL PROTEIN	structural constituent of ribosomeHHGO:0003735;nucleic acid bindingHHGO:0003676;RNA bindingHHGO:0003723;structural molecule activityHHGO:0005198;bindingHHGO:0005488	regulation of biological processHHGO:0050789;biological regulationHHGO:0065007;regulation of translationHHGO:0006417;biosynthetic processHHGO:0009058;protein metabolic processHHGO:0019538;cellular processHHGO:0009987;primary metabolic processHHGO:0044238;metabolic processHHGO:0008152;translationHHGO:0006412	cytoplasmHHGO:0005737;cell partHHGO:0044464;organelleHHGO:0043226;ribonucleoprotein complexHHGO:0030529;ribosomeHHGO:0005840;intracellularHHGO:0005622;macromolecular complexHHGO:0032991	ribosomal proteinHHPC00202;RNA binding proteinHHPC00031;nucleic acid bindingHHPC00171	none
Solyc01g010570.2	0	0	0	0	0	0	0	0	0	0	0	0	0	0	0	0	0	Mucin-like protein (Fragment) (AHRD V1 ***- B0FSK5_9MAGN)	FAMILY NOT NAMED	none	none	none	none	none
Solyc01g010580.2	0	0	0	0	0	0	0	0	0	0	0	0	0	0	0	0	0	Ribosomal protein (AHRD V1 ***- B3TM27_ELAGV)%3B contains Interpro domain(s) IPR002942 RNA-binding S4 IPR018079 Ribosomal protein S4%2C conserved site IPR001912 Ribosomal protein S4	30S 40S RIBOSOMAL PROTEIN	structural constituent of ribosomeHHGO:0003735;nucleic acid bindingHHGO:0003676;RNA bindingHHGO:0003723;structural molecule activityHHGO:0005198;bindingHHGO:0005488	regulation of biological processHHGO:0050789;biological regulationHHGO:0065007;regulation of translationHHGO:0006417;biosynthetic processHHGO:0009058;protein metabolic processHHGO:0019538;cellular processHHGO:0009987;primary metabolic processHHGO:0044238;metabolic processHHGO:0008152;translationHHGO:0006412	cytoplasmHHGO:0005737;cell partHHGO:0044464;organelleHHGO:0043226;ribonucleoprotein complexHHGO:0030529;ribosomeHHGO:0005840;intracellularHHGO:0005622;macromolecular complexHHGO:0032991	ribosomal proteinHHPC00202;RNA binding proteinHHPC00031;nucleic acid bindingHHPC00171	none
Solyc01g010590.2	0	0	0	1	0	0	0	0	0	0	0	0	0	0	0	0	0	Peptidyl-prolyl cis-trans isomerase A (AHRD V1 ***- B6TSE8_MAIZE)%3B contains Interpro domain(s) IPR002130 Peptidyl-prolyl cis-trans isomerase%2C cyclophilin-type	PEPTIDYL-PROLYL CIS-TRANS ISOMERASE	isomerase activityHHGO:0016853;catalytic activityHHGO:0003824	cellular processHHGO:0009987;protein metabolic processHHGO:0019538;primary metabolic processHHGO:0044238;metabolic processHHGO:0008152;cellular protein modification processHHGO:0006464	none	isomeraseHHPC00135	none
Solyc01g010610.1	1	1	0	0	0	-1	0	0	0	0	0	0	0	0	0	0	0	Unknown Protein (AHRD V1)%3B contains Interpro domain(s) IPR003656 Zinc finger%2C BED-type predicted ;_Length	FAMILY NOT NAMED	none	none	none	none	none
Solyc01g010630.1	1	0	1	0	0	0	0	0	0	0	0	0	0	0	0	0	0	Ulp1 protease family C-terminal catalytic domain containing protein (AHRD V1 *-*- Q60D46_SOLDE)	FAMILY NOT NAMED	none	none	none	none	none
Solyc01g010640.2	0	0	0	0	0	0	0	0	0	0	0	0	0	0	0	0	0	Uncharacterized membrane protein (AHRD V1 **-- Q46JN3_PROMT)%3B contains Interpro domain(s) IPR001395 Aldo/keto reductase	FAMILY NOT NAMED	none	none	none	none	none
Solyc01g010650.2	0	0	0	0	0	0	0	0	0	0	0	0	0	0	0	0	0	UDP-galactose transporter 3 (AHRD V1 **** D7KBJ4_ARALY)%3B contains Interpro domain(s) IPR013657 UAA transporter	SOLUTE CARRIER FAMILY 35 MEMBER B	transmembrane transporter activityHHGO:0022857;transporter activityHHGO:0005215	localizationHHGO:0051179;cellular processHHGO:0009987;carbohydrate transportHHGO:0008643;nucleobase-containing compound transportHHGO:0015931;anion transportHHGO:0006820;ion transportHHGO:0006811;transportHHGO:0006810	cytoplasmHHGO:0005737;cell partHHGO:0044464;integral to membraneHHGO:0016021;intracellularHHGO:0005622;nuclear outer membrane-endoplasmic reticulum membrane networkHHGO:0042175;Golgi apparatusHHGO:0005794;membraneHHGO:0016020;endoplasmic reticulumHHGO:0005783;organelleHHGO:0043226	transporterHHPC00227	none
Solyc01g010660.2	0	0	0	0	0	0	0	0	0	0	0	0	0	0	0	0	0	Receptor-like protein kinase At3g21340 (AHRD V1 **** RLK6_ARATH)%3B contains Interpro domain(s) IPR002290 Serine/threonine protein kinase	FAMILY NOT NAMED	none	none	none	none	none
Solyc01g010680.1	0	0	0	0	0	0	0	0	0	0	0	0	0	0	0	0	0	Genomic DNA chromosome 5 P1 clone MRD20 (AHRD V1 *--- Q9FH72_ARATH)%3B contains Interpro domain(s) IPR004332 Transposase%2C MuDR%2C plant	FAMILY NOT NAMED	none	mitosisHHGO:0007067	none	none	none
Solyc01g010700.2	0	0	0	0	0	0	0	0	0	0	0	0	0	0	0	0	0	AKIN gamma (AHRD V1 **-- B4FX20_MAIZE)%3B contains Interpro domain(s) IPR000644 Cystathionine beta-synthase%2C core	AMP-ACTIVATED PROTEIN KINASE, GAMMA REGULATORY SUBUNIT	protein bindingHHGO:0005515;bindingHHGO:0005488;enzyme regulator activityHHGO:0030234;kinase regulator activityHHGO:0019207	lipid metabolic processHHGO:0006629;response to stimulusHHGO:0050896;fatty acid metabolic processHHGO:0006631;response to stressHHGO:0006950;protein phosphorylationHHGO:0006468;protein metabolic processHHGO:0019538;cellular processHHGO:0009987;primary metabolic processHHGO:0044238;metabolic processHHGO:0008152;cellular protein modification processHHGO:0006464	none	kinase modulatorHHPC00140;enzyme modulatorHHPC00095	none
Solyc01g010720.2	0	1	0	0	0	0	0	0	-1	0	0	0	0	0	0	0	1	Serine carboxypeptidase K10B2.2 (AHRD V1 **** B6TKD2_MAIZE)%3B contains Interpro domain(s) IPR001563 Peptidase S10%2C serine carboxypeptidase	SERINE PROTEASE FAMILY S10 SERINE CARBOXYPEPTIDASE	hydrolase activityHHGO:0016787;serine-type peptidase activityHHGO:0008236;peptidase activityHHGO:0008233;catalytic activityHHGO:0003824	catabolic processHHGO:0009056;cellular processHHGO:0009987;protein metabolic processHHGO:0019538;primary metabolic processHHGO:0044238;proteolysisHHGO:0006508;metabolic processHHGO:0008152	none	serine proteaseHHPC00203;proteaseHHPC00190;hydrolaseHHPC00121	none
Solyc01g010740.2	1	0	1	0	0	0	0	0	0	0	0	0	0	0	0	0	0	Pectate lyase family protein (AHRD V1 **** D7M6R5_ARALY)%3B contains Interpro domain(s) IPR002022 Pectate lyase/Amb allergen	FAMILY NOT NAMED	none	none	none	none	none
Solyc01g010750.2	0	0	0	0	0	0	0	0	0	0	0	0	0	0	0	0	0	Stress responsive protein (AHRD V1 *--- B6STP1_MAIZE)%3B contains Interpro domain(s) IPR008997 Ricin B-related lectin	FAMILY NOT NAMED	none	none	none	none	none
Solyc01g010760.2	0	0	0	0	0	0	0	0	0	0	0	0	0	0	0	0	0	Porin/voltage-dependent anion-selective channel protein (AHRD V1 **** A9P802_POPTR)%3B contains Interpro domain(s) IPR001925 Porin%2C eukaryotic type	VOLTAGE-DEPENDENT ANION-SELECTIVE CHANNEL	voltage-gated ion channel activityHHGO:0005244;ion channel activityHHGO:0005216;anion channel activityHHGO:0005253	anion transportHHGO:0006820;ion transportHHGO:0006811;transportHHGO:0006810	none	ion channelHHPC00133;anion channelHHPC00049;transporterHHPC00227;voltage-gated ion channelHHPC00241	none
Solyc01g010780.2	0	-1	0	0	0	0	0	0	0	0	0	0	0	0	0	0	0	ATP binding / serine-threonine kinase (AHRD V1 **** C5DB71_VITVI)%3B contains Interpro domain(s) IPR002290 Serine/threonine protein kinase	FAMILY NOT NAMED	none	none	none	none	none
Solyc01g010810.2	0	0	0	0	0	0	0	0	1	0	0	0	0	0	0	0	0	RAN guanine nucleotide release factor (AHRD V1 **-* B6TPU9_MAIZE)%3B contains Interpro domain(s) IPR016123 Mog1/PsbP%2C alpha/beta/alpha sandwich	FAMILY NOT NAMED	none	none	none	none	none
Solyc01g010820.2	0	0	0	0	0	0	0	0	0	0	0	0	0	0	0	0	0	Cullin C (AHRD V1 ***- D3BHJ6_POLPA)%3B contains Interpro domain(s) IPR001373 Cullin%2C N-terminal	CULLIN	protein bindingHHGO:0005515;bindingHHGO:0005488	catabolic processHHGO:0009056;cellular processHHGO:0009987;protein metabolic processHHGO:0019538;primary metabolic processHHGO:0044238;proteolysisHHGO:0006508;cellular protein modification processHHGO:0006464;metabolic processHHGO:0008152	cell partHHGO:0044464;protein complexHHGO:0043234;macromolecular complexHHGO:0032991;intracellularHHGO:0005622	ubiquitin-protein ligaseHHPC00234;ligaseHHPC00142	none
Solyc01g010830.2	0	0	0	0	-1	0	0	0	0	0	0	0	0	0	0	0	0	HAD-superfamily hydrolase (AHRD V1 ***- D5A3P4_SPIPL)%3B contains Interpro domain(s) IPR011949 HAD-superfamily hydrolase%2C subfamily IA%2C REG-2-like	HALOACID DEHALOGENASE-LIKE HYDROLASE	hydrolase activityHHGO:0016787;catalytic activityHHGO:0003824	none	none	hydrolaseHHPC00121	none
Solyc01g010860.2	0	0	0	0	0	0	0	0	0	0	0	0	0	0	0	0	0	Sphingosine hydroxylase (AHRD V1 *--* A8N9Q2_COPC7)%3B contains Interpro domain(s) IPR006694 Fatty acid hydroxylase	STEROL DESATURASE	oxidoreductase activityHHGO:0016491;catalytic activityHHGO:0003824	lipid metabolic processHHGO:0006629;steroid metabolic processHHGO:0008202;cholesterol metabolic processHHGO:0008203;primary metabolic processHHGO:0044238;metabolic processHHGO:0008152	none	oxidaseHHPC00175;oxidoreductaseHHPC00176;hydroxylaseHHPC00122	none
Solyc01g010870.2	0	0	0	0	0	0	0	0	0	0	0	0	0	0	0	0	0	Dehydration-responsive family protein (AHRD V1 ***- D7KPN7_ARALY)%3B contains Interpro domain(s) IPR004159 Protein of unknown function DUF248%2C methyltransferase putative	METHYLTRANSFERASE	methyltransferase activityHHGO:0008168;transferase activityHHGO:0016740;catalytic activityHHGO:0003824	metabolic processHHGO:0008152	cytoplasmHHGO:0005737;cell partHHGO:0044464;intracellularHHGO:0005622	transferaseHHPC00220;methyltransferaseHHPC00155	none
Solyc01g010880.2	0	0	0	0	0	0	0	0	0	0	0	0	0	0	0	0	0	E3 ubiquitin-protein ligase MARCH3 (AHRD V1 *--- B5X3M1_SALSA)%3B contains Interpro domain(s) IPR011016 Zinc finger%2C RING-CH-type	MEMBRANE ASSOCIATED RING FINGER	ligase activityHHGO:0016874;ubiquitin-protein ligase activityHHGO:0004842;catalytic activityHHGO:0003824	protein metabolic processHHGO:0019538;primary metabolic processHHGO:0044238;proteolysisHHGO:0006508;metabolic processHHGO:0008152	none	ubiquitin-protein ligaseHHPC00234;ligaseHHPC00142	none
Solyc01g010900.2	1	0	0	0	0	1	0	0	0	0	0	0	0	0	0	0	0	Cytochrome P450	FAMILY NOT NAMED	oxidoreductase activityHHGO:0016491;catalytic activityHHGO:0003824	lipid metabolic processHHGO:0006629;steroid metabolic processHHGO:0008202;respiratory electron transport chainHHGO:0022904;primary metabolic processHHGO:0044238;generation of precursor metabolites and energyHHGO:0006091;metabolic processHHGO:0008152	none	oxygenaseHHPC00177;oxidoreductaseHHPC00176	none
Solyc01g010920.1	-1	-1	0	0	0	0	0	0	0	0	0	0	0	0	0	0	0	Os03g0169000 protein (Fragment) (AHRD V1 ***- Q0DUS7_ORYSJ)%3B contains Interpro domain(s) IPR004348 Protein of unknown function DUF246%2C plant	FAMILY NOT NAMED	none	none	cytoplasmHHGO:0005737;cell partHHGO:0044464;intracellularHHGO:0005622	none	none
Solyc01g010930.2	0	0	0	0	0	0	0	0	0	0	0	0	0	0	0	0	0	Os03g0169000 protein (Fragment) (AHRD V1 ***- Q0DUS7_ORYSJ)%3B contains Interpro domain(s) IPR004348 Protein of unknown function DUF246%2C plant	FAMILY NOT NAMED	none	none	cytoplasmHHGO:0005737;cell partHHGO:0044464;intracellularHHGO:0005622	none	none
Solyc01g010940.2	1	1	0	0	0	0	0	0	0	0	0	0	0	0	0	0	0	Transmembrane emp24 domain-containing protein 10 (AHRD V1 ***- B6U439_MAIZE)%3B contains Interpro domain(s) IPR000348 emp24/gp25L/p24	TRANSMEMBRANE EMP24 DOMAIN-CONTAINING PROTEIN	none	intracellular protein transportHHGO:0006886;protein transportHHGO:0015031;transportHHGO:0006810	cytoplasmHHGO:0005737;vesicle coatHHGO:0030120;intracellularHHGO:0005622	vesicle coat proteinHHPC00235;transfer_carrier proteinHHPC00219;membrane traffic proteinHHPC00150	none
Solyc01g010950.2	1	0	0	0	0	0	0	0	0	0	0	0	0	0	0	0	0	Kinase family protein (AHRD V1 **** D7KBF8_ARALY)%3B contains Interpro domain(s) IPR016253 Integrin-linked protein kinase	SERINE-THREONINE PROTEIN KINASE	transferase activityHHGO:0016740;non-membrane spanning protein tyrosine kinase activityHHGO:0004715;catalytic activityHHGO:0003824;kinase activityHHGO:0016301;protein kinase activityHHGO:0004672	response to stimulusHHGO:0050896;response to stressHHGO:0006950;cell cycleHHGO:0007049;protein phosphorylationHHGO:0006468;protein metabolic processHHGO:0019538;cellular processHHGO:0009987;primary metabolic processHHGO:0044238;phosphate-containing compound metabolic processHHGO:0006796;metabolic processHHGO:0008152;cellular protein modification processHHGO:0006464	none	non-receptor serine_threonine protein kinaseHHPC00167;protein kinaseHHPC00193;non-receptor tyrosine protein kinaseHHPC00168;transferaseHHPC00220;kinaseHHPC00137	none
Solyc01g010970.2	0	-1	0	0	0	0	0	0	0	0	0	0	0	0	0	0	0	ARGONAUTE 1 (AHRD V1 ***- D6RUV9_TOBAC)%3B contains Interpro domain(s) IPR003165 Stem cell self-renewal protein Piwi	EUKARYOTIC TRANSLATION INITIATION FACTOR 2C	none	none	none	none	none
Solyc01g010980.1	1	0	0	0	0	0	0	0	0	0	-1	0	0	0	0	0	0	Unknown Protein (AHRD V1)	#N/A	#N/A	#N/A	#N/A	#N/A	#N/A
Solyc01g010990.2	0	0	0	0	0	0	0	0	0	0	0	0	0	0	0	0	0	Unknown Protein (AHRD V1)	FAMILY NOT NAMED	none	none	none	none	none
Solyc01g011000.2	1	1	0	0	0	0	0	0	0	0	0	0	0	0	0	0	0	Eukaryotic translation initiation factor 5A (AHRD V1 **** D6N3G5_GOSHI)%3B contains Interpro domain(s) IPR001884 Translation elongation factor%2C IF5A	TRANSLATION INITIATION FACTOR 5A-RELATED	translation regulator activityHHGO:0045182;nucleic acid bindingHHGO:0003676;translation factor activity, nucleic acid bindingHHGO:0008135;translation initiation factor activityHHGO:0003743;bindingHHGO:0005488	protein metabolic processHHGO:0019538;translationHHGO:0006412;primary metabolic processHHGO:0044238;metabolic processHHGO:0008152	none	translation initiation factorHHPC00224;translation factorHHPC00223;RNA binding proteinHHPC00031;nucleic acid bindingHHPC00171	none
Solyc01g011030.2	0	0	0	0	0	0	0	0	0	0	0	0	0	0	0	0	0	RING zinc finger protein-like (AHRD V1 **-- B6SSZ2_MAIZE)%3B contains Interpro domain(s) IPR001841 Zinc finger%2C RING-type	RING FINGER AND CCCH-TYPE ZINC FINGER DOMAIN-CONTAINING PROTEIN	none	none	none	none	none
Solyc01g011040.2	-1	-1	0	0	0	0	0	0	0	0	0	0	0	0	0	0	0	LRR receptor-like serine/threonine-protein kinase%2C RLP	FAMILY NOT NAMED	none	defense response to bacteriumHHGO:0042742	none	none	none
Solyc01g011060.1	0	0	0	0	0	0	0	0	0	0	0	0	0	0	0	0	0	Maturase (Fragment) (AHRD V1 ***- O79414_SOLTU)%3B contains Interpro domain(s) IPR000442 Intron maturase%2C type II	#N/A	#N/A	#N/A	#N/A	#N/A	#N/A
Solyc01g011090.2	0	-1	0	0	0	0	0	0	0	0	0	0	0	0	0	0	0	Phospholipid-transporting ATPase (AHRD V1 ***- C5G6U4_AJEDR)%3B contains Interpro domain(s) IPR001757 ATPase%2C P-type%2C K/Mg/Cd/Cu/Zn/Na/Ca/Na/H-transporter	FAMILY NOT NAMED	pyrophosphatase activityHHGO:0016462;hydrolase activityHHGO:0016787;transporter activityHHGO:0005215;catalytic activityHHGO:0003824;lipid transporter activityHHGO:0005319	localizationHHGO:0051179;organelle organizationHHGO:0006996;nitrogen compound metabolic processHHGO:0006807;anion transportHHGO:0006820;ion transportHHGO:0006811;transportHHGO:0006810;biological regulationHHGO:0065007;catabolic processHHGO:0009056;vesicle-mediated transportHHGO:0016192;cellular component organizationHHGO:0016043;cellular processHHGO:0009987;nucleobase-containing compound metaboli…	cell partHHGO:0044464;organelleHHGO:0043226;membraneHHGO:0016020;intracellularHHGO:0005622;plasma membraneHHGO:0005886	transporterHHPC00227;cation transporterHHPC00068;hydrolaseHHPC00121	none
Solyc01g011100.2	0	-1	0	0	0	0	0	0	0	0	0	0	0	0	0	0	0	Phospholipid-transporting ATPase (AHRD V1 **** B6JZB6_SCHJY)%3B contains Interpro domain(s) IPR006539 ATPase%2C P-type%2C phospholipid-translocating%2C flippase	FAMILY NOT NAMED	pyrophosphatase activityHHGO:0016462;hydrolase activityHHGO:0016787;transporter activityHHGO:0005215;catalytic activityHHGO:0003824;lipid transporter activityHHGO:0005319	localizationHHGO:0051179;organelle organizationHHGO:0006996;nitrogen compound metabolic processHHGO:0006807;anion transportHHGO:0006820;ion transportHHGO:0006811;transportHHGO:0006810;biological regulationHHGO:0065007;catabolic processHHGO:0009056;vesicle-mediated transportHHGO:0016192;cellular component organizationHHGO:0016043;cellular processHHGO:0009987;nucleobase-containing compound metaboli…	cell partHHGO:0044464;organelleHHGO:0043226;membraneHHGO:0016020;intracellularHHGO:0005622;plasma membraneHHGO:0005886	transporterHHPC00227;cation transporterHHPC00068;hydrolaseHHPC00121	none
Solyc01g011200.2	-1	0	0	0	0	-1	1	0	1	0	0	0	0	0	0	-1	0	Aspartyl protease family protein (AHRD V1 ***- D7LJ61_ARALY)%3B contains Interpro domain(s) IPR001461 Peptidase A1	ASPARTYL PROTEASES	hydrolase activityHHGO:0016787;peptidase activityHHGO:0008233;aspartic-type endopeptidase activityHHGO:0004190;catalytic activityHHGO:0003824	catabolic processHHGO:0009056;protein metabolic processHHGO:0019538;primary metabolic processHHGO:0044238;proteolysisHHGO:0006508;metabolic processHHGO:0008152	none	aspartic proteaseHHPC00053;proteaseHHPC00190;hydrolaseHHPC00121	none
Solyc01g011220.1	-1	0	0	0	0	-1	1	0	1	0	0	0	0	0	0	-1	0	Aspartyl protease family protein (AHRD V1 ***- D7LJ61_ARALY)%3B contains Interpro domain(s) IPR001461 Peptidase A1 ;_Length	ASPARTYL PROTEASES	hydrolase activityHHGO:0016787;peptidase activityHHGO:0008233;aspartic-type endopeptidase activityHHGO:0004190;catalytic activityHHGO:0003824	catabolic processHHGO:0009056;protein metabolic processHHGO:0019538;primary metabolic processHHGO:0044238;proteolysisHHGO:0006508;metabolic processHHGO:0008152	none	aspartic proteaseHHPC00053;proteaseHHPC00190;hydrolaseHHPC00121	none
Solyc01g011230.2	-1	0	0	0	0	0	1	0	0	0	0	0	0	0	0	-1	0	Aspartyl protease family protein (AHRD V1 ***- D7LJ61_ARALY)	#N/A	#N/A	#N/A	#N/A	#N/A	#N/A
Solyc01g011310.1	0	0	0	0	0	0	1	0	1	0	0	0	0	0	0	0	0	Aspartyl protease family protein (AHRD V1 **-- D7LJ61_ARALY)%3B contains Interpro domain(s) IPR001461 Peptidase A1 ;_Length	ASPARTYL PROTEASES	hydrolase activityHHGO:0016787;peptidase activityHHGO:0008233;aspartic-type endopeptidase activityHHGO:0004190;catalytic activityHHGO:0003824	catabolic processHHGO:0009056;protein metabolic processHHGO:0019538;primary metabolic processHHGO:0044238;proteolysisHHGO:0006508;metabolic processHHGO:0008152	none	aspartic proteaseHHPC00053;proteaseHHPC00190;hydrolaseHHPC00121	none
Solyc01g011340.2	0	0	0	0	0	0	0	0	0	0	0	0	0	0	0	0	0	Serine/threonine-protein phosphatase (AHRD V1 **** Q6VUQ5_SOLLC)%3B contains Interpro domain(s) IPR006186 Serine/threonine-specific protein phosphatase and bis(5-nucleosyl)-tetraphosphatase	SERINE_THREONINE PROTEIN PHOSPHATASE	hydrolase activityHHGO:0016787;hydrolase activity, acting on ester bondsHHGO:0016788;phosphatase activityHHGO:0016791;calcium ion bindingHHGO:0005509;bindingHHGO:0005488;catalytic activityHHGO:0003824;phosphoprotein phosphatase activityHHGO:0004721	transcription, DNA-dependentHHGO:0006351;RNA metabolic processHHGO:0016070;glycogen metabolic processHHGO:0005977;protein phosphorylationHHGO:0006468;cellular processHHGO:0009987;transcription from RNA polymerase II promoterHHGO:0006366;nucleobase-containing compound metabolic processHHGO:0006139;cellular protein modification processHHGO:0006464;primary metabolic processHHGO:0044238;response to s…	none	calcium-binding proteinHHPC00060;protein phosphataseHHPC00195;phosphataseHHPC00181;hydrolaseHHPC00121	FGF signaling pathwayHHP00021 PP2AHHP00629;EGF receptor signaling pathwayHHP00018 PP2AHHP00547
Solyc01g011350.2	-1	-1	0	0	0	0	0	0	0	0	0	0	0	0	0	0	0	cDNA clone J013057D02 full insert sequence (AHRD V1 **-- B7EBX1_ORYSJ)	FAMILY NOT NAMED	none	none	none	none	none
Solyc01g011430.2	0	0	0	-1	0	0	1	1	0	0	0	0	0	0	0	0	0	Diacylglycerol O-acyltransferase (AHRD V1 ***- A5UWY0_ROSS1)%3B contains Interpro domain(s) IPR009721 Protein of unknown function DUF1298	FAMILY NOT NAMED	transferase activity, transferring acyl groupsHHGO:0016746;transferase activityHHGO:0016740;catalytic activityHHGO:0003824	lipid metabolic processHHGO:0006629;biosynthetic processHHGO:0009058;cellular processHHGO:0009987;primary metabolic processHHGO:0044238;metabolic processHHGO:0008152	cell partHHGO:0044464;membraneHHGO:0016020;plasma membraneHHGO:0005886	none	none
Solyc01g011510.2	0	0	0	0	0	0	0	0	0	0	0	0	0	0	0	0	0	Aldehyde dehydrogenase (AHRD V1 ***- Q71LY7_ORYSI)%3B contains Interpro domain(s) IPR012394 Aldehyde dehydrogenase NAD(P)-dependent IPR015590 Aldehyde dehydrogenase	FAMILY NOT NAMED	oxidoreductase activityHHGO:0016491;catalytic activityHHGO:0003824	metabolic processHHGO:0008152	none	dehydrogenaseHHPC00092;oxidoreductaseHHPC00176	none
Solyc01g014050.1	0	0	-1	0	1	0	0	-1	1	0	0	0	0	0	0	-1	-1	Unknown Protein (AHRD V1)	#N/A	#N/A	#N/A	#N/A	#N/A	#N/A
Solyc01g014080.1	0	0	0	0	0	0	0	0	0	0	0	0	0	0	0	0	0	Gag-Pol polyprotein (AHRD V1 ***- B8YLY6_MEDTR)%3B contains Interpro domain(s) IPR013103 Reverse transcriptase%2C RNA-dependent DNA polymerase	#N/A	#N/A	#N/A	#N/A	#N/A	#N/A
Solyc01g014110.2	0	0	0	0	0	0	0	0	0	0	0	0	0	0	0	0	0	Unknown Protein (AHRD V1)	FAMILY NOT NAMED	none	none	none	none	none
Solyc01g014120.2	0	-1	0	0	0	0	0	0	0	0	0	0	0	0	0	0	0	Unknown Protein (AHRD V1)	FAMILY NOT NAMED	none	none	none	none	none
Solyc01g014180.2	-1	-1	0	0	0	0	0	0	0	0	0	0	0	0	0	0	0	Zinc finger A20 and AN1 domain-containing stress-associated protein 8 (AHRD V1 ***- SAP8_ORYSJ)%3B contains Interpro domain(s) IPR000058 Zinc finger%2C AN1-type	AN1-TYPE ZINC FINGER PROTEIN	none	respiratory electron transport chainHHGO:0022904;generation of precursor metabolites and energyHHGO:0006091	none	none	none
Solyc01g014200.1	0	0	0	0	1	0	0	0	0	0	0	0	0	0	0	0	0	Unknown Protein (AHRD V1)	#N/A	#N/A	#N/A	#N/A	#N/A	#N/A
Solyc01g014220.1	0	0	0	0	0	0	-1	0	0	0	0	0	0	0	0	0	0	cDNA clone J075118M20 full insert sequence (AHRD V1 ***- B7F980_ORYSJ)%3B contains Interpro domain(s) IPR006852 Protein of unknown function DUF616	ALKALINE CERAMIDASE-RELATED	hydrolase activityHHGO:0016787;catalytic activityHHGO:0003824	lipid metabolic processHHGO:0006629;response to stimulusHHGO:0050896;response to stressHHGO:0006950;primary metabolic processHHGO:0044238;metabolic processHHGO:0008152	none	hydrolaseHHPC00121	none
Solyc01g014230.2	0	-1	0	0	0	0	0	0	0	0	0	0	0	0	0	0	0	U-box domain-containing protein 4 (AHRD V1 **-- PUB4_ARATH)%3B contains Interpro domain(s) IPR011989 Armadillo-like helical	BETA CATENIN-RELATED ARMADILLO REPEAT-CONTAINING	none	none	cytoplasmHHGO:0005737;cell partHHGO:0044464;intracellularHHGO:0005622	cell adhesion moleculeHHPC00069;storage proteinHHPC00210;cytoskeletal proteinHHPC00085;signaling moleculeHHPC00207	none
Solyc01g014250.2	0	0	0	0	0	-1	0	0	0	0	0	0	0	0	0	0	0	Unknown Protein (AHRD V1)	#N/A	#N/A	#N/A	#N/A	#N/A	#N/A
Solyc01g014270.2	0	0	0	0	0	0	0	0	0	0	0	0	0	0	0	0	0	Unknown Protein (AHRD V1)	#N/A	#N/A	#N/A	#N/A	#N/A	#N/A
Solyc01g014360.1	0	1	0	0	0	0	0	0	0	0	0	0	0	0	0	0	0	Unknown Protein (AHRD V1)	FAMILY NOT NAMED	none	none	none	none	none
Solyc01g014380.2	-1	0	-1	0	0	-1	1	0	1	0	0	0	0	0	0	-1	0	Unknown Protein (AHRD V1)	FAMILY NOT NAMED	none	none	none	none	none
Solyc01g014480.2	0	0	0	0	0	0	0	0	0	0	0	0	0	0	0	0	0	Ethylene insensitive 3 class transcription factor (AHRD V1 *-** D5L144_MALDO)%3B contains Interpro domain(s) IPR006957 Ethylene insensitive 3	FAMILY NOT NAMED	none	none	none	none	none
Solyc01g014490.2	0	0	0	0	0	0	0	0	0	0	0	0	0	0	0	0	0	Type II DNA topoisomerase VI subunit B (AHRD V1 ***- C1MLZ8_MICPS)%3B contains Interpro domain(s) IPR015320 DNA topoisomerase VI%2C subunit B%2C transducer	30S RIBOSOMAL PROTEIN S13_40S RIBOSOMAL PROTEIN S18	structural constituent of ribosomeHHGO:0003735;structural molecule activityHHGO:0005198	cellular component biogenesisHHGO:0044085;biosynthetic processHHGO:0009058;cellular processHHGO:0009987;protein metabolic processHHGO:0019538;translationHHGO:0006412;metabolic processHHGO:0008152;primary metabolic processHHGO:0044238	cytoplasmHHGO:0005737;cell partHHGO:0044464;ribonucleoprotein complexHHGO:0030529;intracellularHHGO:0005622;macromolecular complexHHGO:0032991;cytosolHHGO:0005829;organelleHHGO:0043226;ribosomeHHGO:0005840	none	none
Solyc01g014500.1	0	0	0	0	0	0	0	0	0	0	0	0	0	0	0	0	0	Unknown Protein (AHRD V1)%3B contains Interpro domain(s) IPR005162 Retrotransposon gag protein	FAMILY NOT NAMED	none	none	none	none	none
Solyc01g014560.2	0	0	0	0	0	0	0	0	0	0	0	0	0	0	0	0	0	D-mannose binding lectin family protein expressed (AHRD V1 **-- Q2RAY8_ORYSJ)%3B contains Interpro domain(s) IPR001480 Curculin-like (mannose-binding) lectin	FAMILY NOT NAMED	none	none	none	none	none
Solyc01g014620.1	-1	0	0	0	0	0	0	0	0	0	0	0	0	0	0	0	0	Unknown Protein (AHRD V1)	#N/A	#N/A	#N/A	#N/A	#N/A	#N/A
Solyc01g014720.1	0	0	0	0	0	0	0	0	0	0	0	0	0	0	0	0	0	Ethylene-responsive transcription factor 11 (AHRD V1 *-*- ERF76_ARATH)%3B contains Interpro domain(s) IPR001471 Pathogenesis-related transcriptional factor and ERF%2C DNA-binding	FAMILY NOT NAMED	none	none	none	none	none
Solyc01g014840.2	0	0	0	0	0	0	0	0	0	0	0	0	0	0	0	0	0	Tir-nbs-lrr%2C resistance protein	LEUCINE-RICH REPEAT-CONTAINING PROTEIN	none	none	none	none	none
Solyc01g014850.2	0	0	0	0	0	0	0	0	0	0	0	0	0	0	0	0	0	Zinc finger CCCH domain-containing protein 14 (AHRD V1 ***- C3H14_ORYSJ)%3B contains Interpro domain(s) IPR018111 K Homology%2C type 1%2C subgroup	KH DOMAIN CONTAINING RNA BINDING PROTEIN	nucleic acid bindingHHGO:0003676;mRNA bindingHHGO:0003729;protein bindingHHGO:0005515;RNA bindingHHGO:0003723;bindingHHGO:0005488;catalytic activityHHGO:0003824	induction of apoptosisHHGO:0006917;signal transductionHHGO:0007165;transcription, DNA-dependentHHGO:0006351;RNA metabolic processHHGO:0016070;transportHHGO:0006810;cell communicationHHGO:0007154;cellular processHHGO:0009987;transcription from RNA polymerase II promoterHHGO:0006366;nucleobase-containing compound metabolic processHHGO:0006139;primary metabolic processHHGO:0044238;protein transportH…	ribonucleoprotein complexHHGO:0030529	ribonucleoproteinHHPC00201;mRNA processing factorHHPC00147;RNA binding proteinHHPC00031;mRNA splicing factorHHPC00148;enzyme modulatorHHPC00095;nucleic acid bindingHHPC00171	none
Solyc01g014910.1	1	1	0	-1	0	0	-1	-1	0	0	-1	0	0	0	0	0	-1	Transcription factor bHLH95 (AHRD V1 ***- BH095_ARATH)%3B contains Interpro domain(s) IPR011598 Helix-loop-helix DNA-binding ;_Length	MYC	none	none	none	none	p53 pathway feedback loops 2HHP04398 MycHHP04649;Wnt signaling pathwayHHP00057 Wnt Target GenesHHG01558;Oxidative stress responseHHP00046 MycHHP01124;PDGF signaling pathwayHHP00047 c-MycHHP01172
Solyc01g014960.1	-1	0	-1	0	0	0	0	0	1	0	0	0	0	0	0	-1	0	Transcription factor bHLH95 (AHRD V1 ***- BH095_ARATH)	#N/A	#N/A	#N/A	#N/A	#N/A	#N/A
Solyc01g014970.1	1	1	1	-1	0	0	1	0	1	0	-1	0	-1	0	0	0	-1	Unknown Protein (AHRD V1)%3B contains Interpro domain(s) IPR006456 ZF-HD homeobox protein Cys/His-rich dimerisation region	#N/A	#N/A	#N/A	#N/A	#N/A	#N/A
Solyc01g014980.2	0	1	0	0	0	0	-1	0	0	0	0	0	-1	0	0	0	0	Unknown Protein (AHRD V1)	#N/A	#N/A	#N/A	#N/A	#N/A	#N/A
Solyc01g014990.1	0	0	0	0	0	0	0	0	0	0	0	0	0	0	0	0	0	Unknown Protein (AHRD V1)	#N/A	#N/A	#N/A	#N/A	#N/A	#N/A
Solyc01g015000.2	-1	0	0	0	0	0	0	0	0	0	0	0	0	0	0	0	0	Nitrogen regulatory protein P-II (AHRD V1 *-*- Q8DLA5_THEEB)%3B contains Interpro domain(s) IPR002187 Nitrogen regulatory protein PII	NITROGEN REGULATORY PROTEIN P-II	none	none	none	none	none
Solyc01g015020.2	0	0	0	0	0	0	0	0	0	0	0	0	0	0	0	0	0	PRLI-interacting factor A (Fragment) (AHRD V1 *-*- Q9FUB4_ARATH)	FAMILY NOT NAMED	none	none	none	none	none
Solyc01g015040.1	0	1	0	0	0	0	0	0	0	0	0	0	0	0	0	0	0	Unknown Protein (AHRD V1)	#N/A	#N/A	#N/A	#N/A	#N/A	#N/A
Solyc01g015050.1	0	0	0	0	0	0	0	0	0	0	0	0	0	0	0	0	0	Unknown Protein (AHRD V1)	RIBONUCLEASE P SUBUNIT P38	hydrolase activityHHGO:0016787;hydrolase activity, acting on ester bondsHHGO:0016788;nuclease activityHHGO:0004518;catalytic activityHHGO:0003824;endoribonuclease activityHHGO:0004521	cellular processHHGO:0009987;nucleobase-containing compound metabolic processHHGO:0006139;RNA metabolic processHHGO:0016070;nitrogen compound metabolic processHHGO:0006807;metabolic processHHGO:0008152;primary metabolic processHHGO:0044238	cell partHHGO:0044464;nucleolusHHGO:0005730;organelleHHGO:0043226;ribonucleoprotein complexHHGO:0030529;nucleusHHGO:0005634;intracellularHHGO:0005622;macromolecular complexHHGO:0032991	esteraseHHPC00097;endoribonucleaseHHPC00094;RNA binding proteinHHPC00031;nucleaseHHPC00170;nucleic acid bindingHHPC00171;hydrolaseHHPC00121	none
Solyc01g015070.2	0	0	0	0	0	0	0	0	1	0	0	0	0	0	0	0	0	Unknown Protein (AHRD V1)	#N/A	#N/A	#N/A	#N/A	#N/A	#N/A
Solyc01g015140.1	0	0	0	0	0	0	0	0	0	0	0	0	0	0	0	0	0	Cytochrome b (AHRD V1 ***- Q95871_TOBAC)%3B contains Interpro domain(s) IPR016175 Cytochrome b/b6 ;_Length	#N/A	#N/A	#N/A	#N/A	#N/A	#N/A
Solyc01g015170.1	0	0	0	0	0	0	-1	0	-1	0	0	0	0	0	0	1	0	Unknown Protein (AHRD V1)	#N/A	#N/A	#N/A	#N/A	#N/A	#N/A
Solyc01g015190.1	0	1	-1	-1	1	0	0	-1	1	0	0	0	0	0	0	-1	0	Unknown Protein (AHRD V1)	#N/A	#N/A	#N/A	#N/A	#N/A	#N/A
Solyc01g015210.1	-1	-1	-1	1	1	0	0	-1	1	0	0	0	0	0	0	-1	-1	B3 domain-containing protein At1g49475 (AHRD V1 *-*- Y1475_ARATH)%3B contains Interpro domain(s) IPR003340 Transcriptional factor B3 ;_Length	FAMILY NOT NAMED	none	none	none	none	none
Solyc01g015220.1	0	0	0	0	0	0	1	0	1	0	0	0	0	0	0	0	0	Polyprotein (Fragment) (AHRD V1 **-- Q6UTY7_ORYSJ)%3B contains Interpro domain(s) IPR000953 Chromo domain ;_Length	#N/A	#N/A	#N/A	#N/A	#N/A	#N/A
Solyc01g016310.1	0	1	-1	0	0	0	0	-1	1	0	0	0	0	0	0	-1	0	Unknown Protein (AHRD V1)	#N/A	#N/A	#N/A	#N/A	#N/A	#N/A
Solyc01g016330.1	0	1	0	0	0	0	0	0	0	0	0	0	0	0	0	0	0	Gag-pol polyprotein (AHRD V1 **-- Q69FA4_PHAVU)%3B contains Interpro domain(s) IPR013103 Reverse transcriptase%2C RNA-dependent DNA polymerase	#N/A	#N/A	#N/A	#N/A	#N/A	#N/A
Solyc01g016340.1	0	0	0	0	0	0	0	0	0	0	0	0	0	0	0	0	0	Gag-pol polyprotein (AHRD V1 **-- Q69FA4_PHAVU)%3B contains Interpro domain(s) IPR013103 Reverse transcriptase%2C RNA-dependent DNA polymerase	#N/A	#N/A	#N/A	#N/A	#N/A	#N/A
Solyc01g016350.1	1	1	1	0	0	0	0	0	0	0	0	0	-1	0	0	0	0	Unknown Protein (AHRD V1)	#N/A	#N/A	#N/A	#N/A	#N/A	#N/A
Solyc01g016410.2	0	0	0	0	0	0	0	0	0	0	0	0	0	0	0	0	0	RING finger protein 43 (AHRD V1 *-*- RNF43_HUMAN)%3B contains Interpro domain(s) IPR011016 Zinc finger%2C RING-CH-type	RING ZINC FINGER PROTEIN	none	catabolic processHHGO:0009056;cellular processHHGO:0009987;protein metabolic processHHGO:0019538;primary metabolic processHHGO:0044238;metabolic processHHGO:0008152;proteolysisHHGO:0006508;cellular protein modification processHHGO:0006464	none	none	none
Solyc01g016460.2	0	1	0	0	0	0	-1	-1	0	0	0	0	0	0	0	-1	-1	Unknown Protein (AHRD V1)	#N/A	#N/A	#N/A	#N/A	#N/A	#N/A
Solyc01g016470.2	1	1	1	0	-1	0	0	0	0	1	0	0	0	0	0	0	1	Unknown Protein (AHRD V1)%3B contains Interpro domain(s) IPR001813 Ribosomal protein 60S	#N/A	#N/A	#N/A	#N/A	#N/A	#N/A
Solyc01g016480.1	1	1	0	0	0	0	0	0	0	0	0	0	-1	0	0	0	0	Ulp1 protease family C-terminal catalytic domain containing protein (AHRD V1 *-*- Q60D46_SOLDE)	#N/A	#N/A	#N/A	#N/A	#N/A	#N/A
Solyc01g016510.1	1	1	0	0	0	0	0	0	0	0	0	0	0	0	0	0	0	AT4g03420/F9H3_4 (AHRD V1 ***- Q8S9K9_ARATH)%3B contains Interpro domain(s) IPR008507 Protein of unknown function DUF789	#N/A	#N/A	#N/A	#N/A	#N/A	#N/A
Solyc01g016530.1	0	0	0	0	0	0	0	0	0	0	0	0	0	0	0	0	0	Unknown Protein (AHRD V1)%3B contains Interpro domain(s) IPR008507 Protein of unknown function DUF789	#N/A	#N/A	#N/A	#N/A	#N/A	#N/A
Solyc01g016540.1	1	1	0	0	0	0	0	0	0	0	0	0	0	0	0	0	0	Os08g0100600 protein (Fragment) (AHRD V1 *-*- Q0J8P7_ORYSJ)%3B contains Interpro domain(s) IPR008507 Protein of unknown function DUF789	#N/A	#N/A	#N/A	#N/A	#N/A	#N/A
Solyc01g016720.2	1	0	0	0	0	0	-1	0	-1	0	0	0	0	0	0	1	0	Unknown Protein (AHRD V1)	#N/A	#N/A	#N/A	#N/A	#N/A	#N/A
Solyc01g016820.1	1	1	1	-1	0	0	0	0	0	0	0	0	0	0	0	0	0	Unknown Protein (AHRD V1)	#N/A	#N/A	#N/A	#N/A	#N/A	#N/A
Solyc01g016860.1	0	1	0	0	0	0	0	0	0	0	0	0	0	0	0	0	0	Transposase family tnp2 protein (AHRD V1 *--- Q6ATT2_ORYSJ)	FAMILY NOT NAMED	none	none	none	none	none
Solyc01g016950.1	1	1	1	0	1	0	-1	0	-1	0	-1	0	-1	0	0	0	0	Transposon Ty1-PL Gag-Pol polyprotein (AHRD V1 ***- YP11B_YEAST)%3B contains Interpro domain(s) IPR001584 Integrase%2C catalytic core ;_Length	GAG-POL-RELATED RETROTRANSPOSON	none	none	none	none	none
Solyc01g017010.1	0	1	0	0	0	0	0	0	-1	0	0	0	0	0	0	0	0	Unknown Protein (AHRD V1)	#N/A	#N/A	#N/A	#N/A	#N/A	#N/A
Solyc01g017030.1	1	1	0	0	0	0	-1	0	-1	0	0	0	0	0	0	0	0	ARID/BRIGHT DNA-binding domain-containing protein (AHRD V1 ***- D7KTU4_ARALY)%3B contains Interpro domain(s) IPR008978 HSP20-like chaperone	AT-RICH INTERACTIVE DOMAIN-CONTAINING PROTEIN ARID DOMAIN- CONTAINING PROTEIN DEAD RINGER PROTEIN B-CELL REGULATOR OF IGH TRANSCRIPTION BRIGHT	nucleic acid bindingHHGO:0003676;sequence-specific DNA binding transcription factor activityHHGO:0003700;bindingHHGO:0005488;DNA bindingHHGO:0003677	nucleobase-containing compound metabolic processHHGO:0006139;primary metabolic processHHGO:0044238;metabolic processHHGO:0008152	none	transcription factorHHPC00218;nucleic acid bindingHHPC00171	none
Solyc01g017090.2	0	0	0	0	0	0	0	0	0	0	0	0	0	0	0	0	0	NADH-quinone oxidoreductase subunit L (AHRD V1 *-*- NUOL_NEIMA)%3B contains Interpro domain(s) IPR018393 NADH-plastoquinone oxidoreductase%2C chain 5 subgroup	NADH DEHYDROGENASE	oxidoreductase activityHHGO:0016491;catalytic activityHHGO:0003824	respiratory electron transport chainHHGO:0022904;oxidative phosphorylationHHGO:0006119;generation of precursor metabolites and energyHHGO:0006091	none	dehydrogenaseHHPC00092;reductaseHHPC00198;oxidoreductaseHHPC00176	none
Solyc01g017340.1	0	0	0	0	0	0	0	0	0	0	0	0	0	0	0	0	0	Cytochrome c biogenesis protein ccsA (AHRD V1 *-*- D8FZF0_9CYAN)%3B contains Interpro domain(s) IPR002541 Cytochrome c assembly protein ;_Length	HEME EXPORTER PROTEIN C	none	localizationHHGO:0051179;metabolic processHHGO:0008152;transportHHGO:0006810	cell partHHGO:0044464;membraneHHGO:0016020;plasma membraneHHGO:0005886	none	none
Solyc01g017550.1	1	1	0	0	0	-1	0	0	1	0	0	0	0	0	0	0	0	Unknown Protein (AHRD V1)	#N/A	#N/A	#N/A	#N/A	#N/A	#N/A
Solyc01g017610.1	1	1	1	0	0	1	0	0	0	0	0	0	0	0	0	0	0	Alliinase (Fragment) (AHRD V1 ***- D2CXM3_ALLSA)%3B contains Interpro domain(s) IPR006948 Allinase%2C C-terminal ;_Length	FAMILY NOT NAMED	transaminase activityHHGO:0008483;transferase activityHHGO:0016740;catalytic activityHHGO:0003824	cellular amino acid metabolic processHHGO:0006520;porphyrin-containing compound metabolic processHHGO:0006778;nitrogen compound metabolic processHHGO:0006807;primary metabolic processHHGO:0044238;metabolic processHHGO:0008152	none	transaminaseHHPC00216;transferaseHHPC00220	none
Solyc01g017750.1	0	0	0	1	0	0	0	0	0	0	0	0	0	0	0	0	0	Unknown Protein (AHRD V1)	#N/A	#N/A	#N/A	#N/A	#N/A	#N/A
Solyc01g017790.1	1	1	0	-1	0	0	-1	0	-1	0	0	0	0	0	0	0	0	ARID/BRIGHT DNA-binding domain-containing protein (AHRD V1 ***- D7KTU4_ARALY)%3B contains Interpro domain(s) IPR008978 HSP20-like chaperone	AT-RICH INTERACTIVE DOMAIN-CONTAINING PROTEIN ARID DOMAIN- CONTAINING PROTEIN DEAD RINGER PROTEIN B-CELL REGULATOR OF IGH TRANSCRIPTION BRIGHT	nucleic acid bindingHHGO:0003676;sequence-specific DNA binding transcription factor activityHHGO:0003700;bindingHHGO:0005488;DNA bindingHHGO:0003677	nucleobase-containing compound metabolic processHHGO:0006139;primary metabolic processHHGO:0044238;metabolic processHHGO:0008152	none	transcription factorHHPC00218;nucleic acid bindingHHPC00171	none
Solyc01g017800.1	1	1	0	0	0	0	0	0	0	0	-1	0	0	0	0	0	0	Unknown Protein (AHRD V1)	#N/A	#N/A	#N/A	#N/A	#N/A	#N/A
Solyc01g017830.1	0	0	0	0	0	0	0	0	0	0	0	0	0	0	0	0	0	Transposase family tnp2 protein (AHRD V1 *--- Q6ATT2_ORYSJ)	FAMILY NOT NAMED	none	none	none	none	none
Solyc01g017850.1	0	1	1	0	0	0	0	0	0	0	0	0	0	0	0	0	0	Helicase-like protein (AHRD V1 *-*- Q9AYF0_ORYSJ)%3B contains Interpro domain(s) IPR010285 Protein of unknown function DUF889%2C eukaryote	UNCHARACTERIZED	none	none	none	none	none
Solyc01g017860.2	0	0	0	0	0	0	0	0	0	0	0	0	0	0	0	0	0	Unknown Protein (AHRD V1)	#N/A	#N/A	#N/A	#N/A	#N/A	#N/A
Solyc01g017870.1	1	1	1	-1	-1	1	1	0	1	1	-1	0	-1	0	0	1	0	Unknown Protein (AHRD V1)	#N/A	#N/A	#N/A	#N/A	#N/A	#N/A
Solyc01g018070.1	1	1	0	0	0	0	0	0	0	0	0	0	0	0	0	0	0	ARID/BRIGHT DNA-binding domain-containing protein (AHRD V1 ***- D7KTU4_ARALY)%3B contains Interpro domain(s) IPR008978 HSP20-like chaperone	AT-RICH INTERACTIVE DOMAIN-CONTAINING PROTEIN ARID DOMAIN- CONTAINING PROTEIN DEAD RINGER PROTEIN B-CELL REGULATOR OF IGH TRANSCRIPTION BRIGHT	nucleic acid bindingHHGO:0003676;sequence-specific DNA binding transcription factor activityHHGO:0003700;bindingHHGO:0005488;DNA bindingHHGO:0003677	nucleobase-containing compound metabolic processHHGO:0006139;primary metabolic processHHGO:0044238;metabolic processHHGO:0008152	none	transcription factorHHPC00218;nucleic acid bindingHHPC00171	none
Solyc01g018080.1	0	0	0	0	0	0	0	0	0	0	0	0	0	0	0	0	0	Unknown Protein (AHRD V1)	#N/A	#N/A	#N/A	#N/A	#N/A	#N/A
Solyc01g020110.1	1	1	-1	0	1	0	1	0	1	0	0	0	-1	0	0	-1	0	Zinc finger family protein (AHRD V1 *-*- D7LC67_ARALY)	RING FINGER DOMAIN-CONTAINING, POLYCOMB GROUP COMPONENT	ubiquitin-protein ligase activityHHGO:0004842	cellular protein modification processHHGO:0006464	none	ubiquitin-protein ligaseHHPC00234	none
Solyc01g020120.1	1	1	0	0	0	0	-1	0	-1	0	0	0	0	0	0	0	0	DNA replication licensing factor mcm6 (AHRD V1 ***- C4JDH8_UNCRE)%3B contains Interpro domain(s) IPR016027 Nucleic acid-binding%2C OB-fold-like	DNA REPLICATION LICENSING FACTOR	hydrolase activityHHGO:0016787;DNA helicase activityHHGO:0003678;nucleic acid bindingHHGO:0003676;helicase activityHHGO:0004386;bindingHHGO:0005488;catalytic activityHHGO:0003824	cell cycleHHGO:0007049;cellular processHHGO:0009987;DNA replicationHHGO:0006260;nucleobase-containing compound metabolic processHHGO:0006139;metabolic processHHGO:0008152;primary metabolic processHHGO:0044238;DNA metabolic processHHGO:0006259	none	DNA binding proteinHHPC00009;DNA helicaseHHPC00011;helicaseHHPC00115;nucleic acid bindingHHPC00171;hydrolaseHHPC00121	none
Solyc01g020130.2	0	0	0	0	0	0	0	0	0	0	0	0	0	0	0	0	0	Glycosyltransferase (AHRD V1 ***- Q50HV0_SOLLC)%3B contains Interpro domain(s) IPR005027 Glycosyl transferase%2C family 43	GALACTOSYLGALACTOSYLXYLOSYLPROTEIN 3-BETA-GLUCURONOSYLTRANSFERASE BETA-1,3-GLUCURONYLTRANSFERASE	transferase activityHHGO:0016740;transferase activity, transferring glycosyl groupsHHGO:0016757;catalytic activityHHGO:0003824	polysaccharide metabolic processHHGO:0005976;cellular component biogenesisHHGO:0044085;biosynthetic processHHGO:0009058;cellular processHHGO:0009987;carbohydrate metabolic processHHGO:0005975;metabolic processHHGO:0008152;primary metabolic processHHGO:0044238	Golgi apparatusHHGO:0005794;cytoplasmHHGO:0005737;cell partHHGO:0044464;organelleHHGO:0043226;membraneHHGO:0016020;intracellularHHGO:0005622	glycosyltransferaseHHPC00111;transferaseHHPC00220	none
Solyc01g020150.2	0	0	0	0	0	0	-1	0	-1	0	0	0	0	0	0	0	1	Glycosyltransferase (AHRD V1 ***- Q50HU7_SOLTU)%3B contains Interpro domain(s) IPR005027 Glycosyl transferase%2C family 43	#N/A	#N/A	#N/A	#N/A	#N/A	#N/A
Solyc01g020170.1	0	1	0	0	0	0	0	0	0	0	0	0	0	0	0	0	0	Basic helix-loop-helix family protein (AHRD V1 ***- D7KF18_ARALY)%3B contains Interpro domain(s) IPR011598 Helix-loop-helix DNA-binding ;_Length	MYC	none	none	none	none	p53 pathway feedback loops 2HHP04398 MycHHP04649;Wnt signaling pathwayHHP00057 Wnt Target GenesHHG01558;Oxidative stress responseHHP00046 MycHHP01124;PDGF signaling pathwayHHP00047 c-MycHHP01172
Solyc01g020190.2	0	0	0	0	0	0	0	0	0	0	0	0	0	0	0	0	0	Membrane-associated ring finger 6 (AHRD V1 *--- B3VKM1_PIG)%3B contains Interpro domain(s) IPR011016 Zinc finger%2C RING-CH-type	#N/A	#N/A	#N/A	#N/A	#N/A	#N/A
Solyc01g020220.1	0	1	-1	0	0	0	1	-1	1	0	0	0	0	0	0	-1	-1	Replication factor C subunit 5 (AHRD V1 ***- B6T5I0_MAIZE)%3B contains Interpro domain(s) IPR019483 DNA polymerase III%2C clamp-loader complex%2C subunit E%2C C-terminal	REPLICATION FACTOR C _ DNA POLYMERASE III GAMMA-TAU SUBUNIT	pyrophosphatase activityHHGO:0016462;hydrolase activityHHGO:0016787;nucleic acid bindingHHGO:0003676;bindingHHGO:0005488;catalytic activityHHGO:0003824;DNA bindingHHGO:0003677	DNA repairHHGO:0006281;response to stimulusHHGO:0050896;response to stressHHGO:0006950;nitrogen compound metabolic processHHGO:0006807;catabolic processHHGO:0009056;biosynthetic processHHGO:0009058;cellular processHHGO:0009987;DNA replicationHHGO:0006260;nucleobase-containing compound metabolic processHHGO:0006139;metabolic processHHGO:0008152;DNA metabolic processHHGO:0006259;primary metabolic p…	cell partHHGO:0044464;organelleHHGO:0043226;nucleusHHGO:0005634;protein complexHHGO:0043234;chromosomeHHGO:0005694;intracellularHHGO:0005622;macromolecular complexHHGO:0032991	DNA-directed DNA polymeraseHHPC00018;DNA binding proteinHHPC00009;transferaseHHPC00220;nucleotidyltransferaseHHPC00174;nucleic acid bindingHHPC00171	DNA replicationHHP00017 RFCHHP00529
Solyc01g020230.2	0	1	0	0	0	0	0	-1	1	0	0	0	0	0	0	-1	-1	Unknown Protein (AHRD V1)	#N/A	#N/A	#N/A	#N/A	#N/A	#N/A
Solyc01g020240.2	0	0	0	0	0	0	0	0	0	0	0	0	0	0	0	0	0	T31J12.1 protein (Fragment) (AHRD V1 ***- Q9ZPZ6_ARATH)	THUMP DOMAIN CONTAINING PROTEIN 1-RELATED	none	none	none	none	none
Solyc01g020250.1	0	0	0	0	0	0	0	0	0	0	0	0	0	0	0	0	0	Pol polyprotein (AHRD V1 ***- POL_SMRVH)	#N/A	#N/A	#N/A	#N/A	#N/A	#N/A
Solyc01g020270.1	0	1	0	0	0	0	0	0	0	0	0	0	0	0	0	0	0	Ulp1 protease family C-terminal catalytic domain containing protein (AHRD V1 ***- Q60D46_SOLDE)%3B contains Interpro domain(s) IPR003653 Peptidase C48%2C SUMO/Sentrin/Ubl1 ;_Length	FAMILY NOT NAMED	none	none	none	none	none
Solyc01g020320.2	0	0	0	0	0	0	0	0	0	0	0	0	0	0	0	0	0	Unknown Protein (AHRD V1)	FAMILY NOT NAMED	none	none	none	none	none
Solyc01g020330.2	1	1	0	0	0	1	0	0	0	0	0	0	0	0	0	0	0	Unknown Protein (AHRD V1)	#N/A	#N/A	#N/A	#N/A	#N/A	#N/A
Solyc01g020340.1	0	0	0	0	0	0	0	0	0	0	0	0	0	0	0	0	0	Pentatricopeptide repeat-containing protein (AHRD V1 ***- D7MLP6_ARALY)%3B contains Interpro domain(s) IPR002885 Pentatricopeptide repeat	FAMILY NOT NAMED	nucleic acid bindingHHGO:0003676;RNA bindingHHGO:0003723;transmembrane transporter activityHHGO:0022857;transferase activityHHGO:0016740;bindingHHGO:0005488;catalytic activityHHGO:0003824;transmembrane receptor protein kinase activityHHGO:0019199;transmembrane receptor protein serine_threonine kinase activityHHGO:0004675;receptor activityHHGO:0004872;transporter activityHHGO:0005215;kinase activi…	intracellular protein transportHHGO:0006886;protein phosphorylationHHGO:0006468;protein metabolic processHHGO:0019538;cellular protein modification processHHGO:0006464;metabolic processHHGO:0008152;transportHHGO:0006810;protein transportHHGO:0015031;primary metabolic processHHGO:0044238	none	protein kinase receptorHHPC00194;protein kinaseHHPC00193;serine_threonine protein kinase receptorHHPC00205;transporterHHPC00227;transferaseHHPC00220;RNA binding proteinHHPC00031;kinaseHHPC00137;receptorHHPC00197;nucleic acid bindingHHPC00171	none
Solyc01g020360.1	0	0	0	0	0	0	0	0	0	0	0	0	0	0	0	0	0	Unknown Protein (AHRD V1)	#N/A	#N/A	#N/A	#N/A	#N/A	#N/A
Solyc01g020370.1	-1	-1	0	0	0	-1	1	1	1	0	0	0	0	0	0	-1	0	Unknown Protein (AHRD V1)	#N/A	#N/A	#N/A	#N/A	#N/A	#N/A
Solyc01g020440.2	0	0	1	0	0	0	0	1	-1	0	0	0	0	0	0	1	0	Replication factor C subunit 5 (AHRD V1 ***- B6T5I0_MAIZE)%3B contains Interpro domain(s) IPR019483 DNA polymerase III%2C clamp-loader complex%2C subunit E%2C C-terminal	REPLICATION FACTOR C _ DNA POLYMERASE III GAMMA-TAU SUBUNIT	pyrophosphatase activityHHGO:0016462;hydrolase activityHHGO:0016787;nucleic acid bindingHHGO:0003676;bindingHHGO:0005488;catalytic activityHHGO:0003824;DNA bindingHHGO:0003677	DNA repairHHGO:0006281;response to stimulusHHGO:0050896;response to stressHHGO:0006950;nitrogen compound metabolic processHHGO:0006807;catabolic processHHGO:0009056;biosynthetic processHHGO:0009058;cellular processHHGO:0009987;DNA replicationHHGO:0006260;nucleobase-containing compound metabolic processHHGO:0006139;metabolic processHHGO:0008152;DNA metabolic processHHGO:0006259;primary metabolic p…	cell partHHGO:0044464;organelleHHGO:0043226;nucleusHHGO:0005634;protein complexHHGO:0043234;chromosomeHHGO:0005694;intracellularHHGO:0005622;macromolecular complexHHGO:0032991	DNA-directed DNA polymeraseHHPC00018;DNA binding proteinHHPC00009;transferaseHHPC00220;nucleotidyltransferaseHHPC00174;nucleic acid bindingHHPC00171	DNA replicationHHP00017 RFCHHP00529
Solyc01g020500.1	0	1	0	0	0	0	-1	-1	0	0	0	0	0	0	0	-1	-1	Unknown Protein (AHRD V1)	#N/A	#N/A	#N/A	#N/A	#N/A	#N/A
Solyc01g020520.2	0	0	0	0	0	0	0	0	0	0	0	0	0	0	0	0	0	Membrane-bound transcription factor protease site 2 (AHRD V1 ***- Q4V9P5_DANRE)%3B contains Interpro domain(s) IPR008915 Peptidase M50	PROTEASE M50 MEMBRANE-BOUND TRANSCRIPTION FACTOR SITE 2 PROTEASE	none	none	none	none	none
Solyc01g020580.1	1	1	0	0	0	0	0	0	0	0	0	0	0	0	0	0	0	Unknown Protein (AHRD V1);_Length	FAMILY NOT NAMED	none	mitosisHHGO:0007067	none	none	none
Solyc01g021600.2	0	0	0	0	0	0	0	0	0	0	0	0	0	0	0	0	0	Disease resistance response protein (AHRD V1 ***- A8IXC7_BRACM)%3B contains Interpro domain(s) IPR004265 Plant disease resistance response protein	NUCLEOPORIN-RELATED	none	none	none	none	none
Solyc01g021640.2	0	0	0	0	0	0	0	0	0	0	0	0	0	0	0	0	0	DDB1- and CUL4-associated factor 4 (AHRD V1 **-- DCAF4_BOVIN)%3B contains Interpro domain(s) IPR011046 WD40 repeat-like	KATANIN P80 SUBUNIT	none	none	none	none	none
Solyc01g021670.2	0	0	0	0	0	0	0	0	0	0	0	0	0	0	0	0	0	POT family domain containing protein expressed (AHRD V1 ***- D8L9H8_WHEAT)%3B contains Interpro domain(s) IPR007493 Protein of unknown function DUF538	FAMILY NOT NAMED	none	none	none	none	none
Solyc01g021690.1	1	0	0	0	0	0	0	0	0	0	0	0	0	0	0	0	0	Unknown Protein (AHRD V1)	SMALL NUCLEAR RIBONUCLEOPROTEIN SM	nucleic acid bindingHHGO:0003676;RNA bindingHHGO:0003723;bindingHHGO:0005488	cellular component biogenesisHHGO:0044085;organelle organizationHHGO:0006996;RNA metabolic processHHGO:0016070;nitrogen compound metabolic processHHGO:0006807;mRNA processingHHGO:0006397;catabolic processHHGO:0009056;RNA catabolic processHHGO:0006401;cellular component organizationHHGO:0016043;RNA splicing, via transesterification reactionsHHGO:0000375;cellular processHHGO:0009987;RNA splicingHHG…	cytoplasmHHGO:0005737;cell partHHGO:0044464;organelleHHGO:0043226;ribonucleoprotein complexHHGO:0030529;nucleusHHGO:0005634;intracellularHHGO:0005622;macromolecular complexHHGO:0032991	ribonucleoproteinHHPC00201;mRNA processing factorHHPC00147;RNA binding proteinHHPC00031;mRNA splicing factorHHPC00148;nucleic acid bindingHHPC00171	none
Solyc01g021700.1	1	1	0	0	0	0	0	-1	1	0	-1	0	0	0	0	0	-1	Unknown Protein (AHRD V1)	#N/A	#N/A	#N/A	#N/A	#N/A	#N/A
Solyc01g021730.2	1	0	0	0	0	0	0	0	0	0	0	0	0	0	0	0	0	NAC domain protein IPR003441 (AHRD V1 *-*- B9IHI9_POPTR)%3B contains Interpro domain(s) IPR003441 No apical meristem (NAM) protein	FAMILY NOT NAMED	none	none	none	none	none
Solyc01g022740.2	0	0	0	0	0	0	0	0	0	0	0	0	0	0	0	0	0	Kelch-like protein 21 (AHRD V1 *-*- KLH21_MOUSE)%3B contains Interpro domain(s) IPR015915 Kelch-type beta propeller	FAMILY NOT NAMED	ligase activityHHGO:0016874;ubiquitin-protein ligase activityHHGO:0004842;catalytic activityHHGO:0003824	cellular processHHGO:0009987;protein metabolic processHHGO:0019538;primary metabolic processHHGO:0044238;cellular protein modification processHHGO:0006464;metabolic processHHGO:0008152	cell partHHGO:0044464;protein complexHHGO:0043234;macromolecular complexHHGO:0032991;intracellularHHGO:0005622	none	none
Solyc01g022750.2	0	0	0	0	0	0	0	0	0	0	0	0	0	0	0	0	0	NADH dehydrogenase (AHRD V1 **** B5G1U3_TAEGU)%3B contains Interpro domain(s) IPR008011 Complex 1 LYR protein	NADH-UBIQUINONE OXIDOREDUCTASE B14 SUBUNIT	oxidoreductase activityHHGO:0016491;catalytic activityHHGO:0003824	respiratory electron transport chainHHGO:0022904;generation of precursor metabolites and energyHHGO:0006091;oxidative phosphorylationHHGO:0006119	none	dehydrogenaseHHPC00092;oxidoreductaseHHPC00176	none
Solyc01g022770.1	-1	-1	1	0	0	-1	0	1	-1	0	0	0	0	1	0	0	0	Unknown Protein (AHRD V1)	#N/A	#N/A	#N/A	#N/A	#N/A	#N/A
Solyc01g022780.1	0	0	1	-1	0	0	0	0	-1	0	0	0	0	1	0	0	0	Unknown Protein (AHRD V1);_Length	FAMILY NOT NAMED	none	none	none	none	none
Solyc01g028800.1	0	0	0	0	0	0	0	0	0	0	0	0	0	0	0	0	0	Pumilio-family RNA binding protein (AHRD V1 *-*- A8N273_COPC7)%3B contains Interpro domain(s) IPR011989 Armadillo-like helical ;_Length	RNA BINDING PROTEIN PUMILIO-RELATED	nucleic acid bindingHHGO:0003676;mRNA bindingHHGO:0003729;RNA bindingHHGO:0003723;translation factor activity, nucleic acid bindingHHGO:0008135;bindingHHGO:0005488	mRNA processingHHGO:0006397;protein metabolic processHHGO:0019538;nucleobase-containing compound metabolic processHHGO:0006139;RNA metabolic processHHGO:0016070;translationHHGO:0006412;metabolic processHHGO:0008152;primary metabolic processHHGO:0044238	none	translation factorHHPC00223;mRNA processing factorHHPC00147;RNA binding proteinHHPC00031;nucleic acid bindingHHPC00171	none
Solyc01g028810.2	0	0	0	0	0	0	0	0	0	0	0	0	0	0	0	0	0	chaperonin (AHRD V1 ***- B4VMY1_9CYAN)%3B contains Interpro domain(s) IPR001844 Chaperonin Cpn60	CHAPERONIN	none	protein metabolic processHHGO:0019538;protein foldingHHGO:0006457;primary metabolic processHHGO:0044238;metabolic processHHGO:0008152	none	chaperoninHHPC00073;chaperoneHHPC00072	none
Solyc01g028830.2	0	-1	1	0	0	0	0	0	0	0	0	0	0	0	0	1	0	ATP binding / serine-threonine kinase (AHRD V1 **** C5DB71_VITVI)%3B contains Interpro domain(s) IPR002290 Serine/threonine protein kinase	FAMILY NOT NAMED	none	none	none	none	none
Solyc01g028850.1	0	0	0	0	0	0	-1	0	0	0	0	0	0	0	0	0	0	Unknown Protein (AHRD V1)%3B contains Interpro domain(s) IPR010285 Protein of unknown function DUF889%2C eukaryote	#N/A	#N/A	#N/A	#N/A	#N/A	#N/A
Solyc01g028860.2	0	0	0	0	0	0	0	0	0	0	0	0	0	0	0	0	0	YTH domain family 2 (Predicted) (AHRD V1 *--- B2GUU1_RAT)%3B contains Interpro domain(s) IPR007275 YT521-B-like protein	YTH YT521-B HOMOLOGY DOMAIN-CONTAINING	none	none	none	none	none
Solyc01g028870.2	0	0	0	0	0	0	0	0	0	0	0	0	0	0	0	0	0	N utilization substance protein B homolog (AHRD V1 *-*- D5S311_CLODI)%3B contains Interpro domain(s) IPR006027 NusB/RsmB/TIM44	N UTILIZATION SUBSTANCE PROTEIN B-RELATED	none	none	none	none	none
Solyc01g028900.2	0	0	0	0	0	-1	0	0	0	0	0	0	0	0	0	0	0	1-deoxy-D-xylulose-5-phosphate synthase (AHRD V1 **-- DXS_DESAP)%3B contains Interpro domain(s) IPR005475 Transketolase%2C central region	FAMILY NOT NAMED	lyase activityHHGO:0016829;transferase activityHHGO:0016740;transketolase activityHHGO:0004802;catalytic activityHHGO:0003824;oxidoreductase activityHHGO:0016491	lipid metabolic processHHGO:0006629;monosaccharide metabolic processHHGO:0005996;vitamin metabolic processHHGO:0006766;pentose-phosphate shuntHHGO:0006098;vitamin biosynthetic processHHGO:0009110;cellular amino acid metabolic processHHGO:0006520;cellular amino acid catabolic processHHGO:0009063;carbohydrate metabolic processHHGO:0005975;primary metabolic processHHGO:0044238;metabolic processHHGO:…	none	dehydrogenaseHHPC00092;transferaseHHPC00220;oxidoreductaseHHPC00176;transketolaseHHPC00221;lyaseHHPC00144	none
Solyc01g028930.2	0	0	0	0	0	0	0	0	0	0	0	0	0	0	0	0	0	TATA-box binding protein (AHRD V1 ***- Q9ZTX5_PHAVU)%3B contains Interpro domain(s) IPR000814 TATA-box binding	TATA-BOX BINDING PROTEIN	nucleic acid bindingHHGO:0003676;sequence-specific DNA binding transcription factor activityHHGO:0003700;bindingHHGO:0005488;DNA bindingHHGO:0003677	transcription, DNA-dependentHHGO:0006351;transcription initiation from RNA polymerase II promoterHHGO:0006367;transcription from RNA polymerase II promoterHHGO:0006366;nucleobase-containing compound metabolic processHHGO:0006139;primary metabolic processHHGO:0044238;metabolic processHHGO:0008152	none	transcription factorHHPC00218;nucleic acid bindingHHPC00171	General transcription by RNA polymerase IHHP00022 SL1 complexHHP00653;General transcription by RNA polymerase IHHP00022 TBPHHP00657;Huntington diseaseHHP00029 TBPHHP00779;Transcription regulation by bZIP transcription factorHHP00055 TBPHHP01399
Solyc01g028970.1	0	1	0	-1	0	0	0	0	0	0	0	0	0	0	0	0	0	Retrotransposon gag protein (AHRD V1 ***- Q0KIS1_SOLDE)%3B contains Interpro domain(s) IPR005162 Retrotransposon gag protein ;_Length	#N/A	#N/A	#N/A	#N/A	#N/A	#N/A
Solyc01g033980.2	0	1	0	0	0	0	-1	-1	0	0	0	0	0	0	0	0	0	Unknown Protein (AHRD V1)	#N/A	#N/A	#N/A	#N/A	#N/A	#N/A
Solyc01g034010.1	1	1	0	0	0	0	-1	0	-1	0	-1	0	0	0	0	0	0	Serine/threonine-protein phosphatase 7 long form homolog (AHRD V1 **-- PPP7L_ARATH)%3B contains Interpro domain(s) IPR019557 Aminotransferase-like%2C plant mobile domain	FAMILY NOT NAMED	none	mitosisHHGO:0007067	none	none	none
Solyc01g034020.2	0	0	0	0	0	0	0	0	0	0	0	0	0	0	0	0	0	Serine/threonine-protein phosphatase (AHRD V1 **** A5AT05_VITVI)%3B contains Interpro domain(s) IPR006186 Serine/threonine-specific protein phosphatase and bis(5-nucleosyl)-tetraphosphatase	SERINE_THREONINE PROTEIN PHOSPHATASE	hydrolase activityHHGO:0016787;hydrolase activity, acting on ester bondsHHGO:0016788;phosphatase activityHHGO:0016791;calcium ion bindingHHGO:0005509;bindingHHGO:0005488;catalytic activityHHGO:0003824;phosphoprotein phosphatase activityHHGO:0004721	transcription, DNA-dependentHHGO:0006351;RNA metabolic processHHGO:0016070;glycogen metabolic processHHGO:0005977;protein phosphorylationHHGO:0006468;cellular processHHGO:0009987;transcription from RNA polymerase II promoterHHGO:0006366;nucleobase-containing compound metabolic processHHGO:0006139;cellular protein modification processHHGO:0006464;primary metabolic processHHGO:0044238;response to s…	none	calcium-binding proteinHHPC00060;protein phosphataseHHPC00195;phosphataseHHPC00181;hydrolaseHHPC00121	FGF signaling pathwayHHP00021 PP2AHHP00629;EGF receptor signaling pathwayHHP00018 PP2AHHP00547
Solyc01g034040.1	1	1	0	0	0	0	0	0	0	0	-1	0	-1	0	0	0	0	HGWP repeat containing protein-like (AHRD V1 *--- Q5ZAQ6_ORYSJ)	#N/A	#N/A	#N/A	#N/A	#N/A	#N/A
Solyc01g034060.1	0	0	0	0	0	0	0	0	0	0	0	0	0	0	0	0	0	Unknown Protein (AHRD V1)	FAMILY NOT NAMED	none	none	none	none	none
Solyc01g034070.1	0	0	0	0	0	0	0	0	0	0	0	0	0	0	0	0	0	Unknown Protein (AHRD V1)%3B contains Interpro domain(s) IPR016027 Nucleic acid-binding%2C OB-fold-like	REPLICATION FACTOR A 1, RFA1	none	none	none	none	none
Solyc01g034080.1	1	1	0	0	0	0	0	0	1	0	0	0	0	0	0	-1	0	Amino acid permease (Fragment) (AHRD V1 ***- B8C3S3_THAPS)%3B contains Interpro domain(s) IPR002293 Amino acid/polyamine transporter I ;_Length	AMINO ACID TRANSPORTER	transmembrane transporter activityHHGO:0022857;amino acid transmembrane transporter activityHHGO:0015171;transporter activityHHGO:0005215	localizationHHGO:0051179;cellular processHHGO:0009987;amino acid transportHHGO:0006865;anion transportHHGO:0006820;ion transportHHGO:0006811;transportHHGO:0006810	cell partHHGO:0044464;membraneHHGO:0016020;integral to membraneHHGO:0016021;plasma membraneHHGO:0005886	amino acid transporterHHPC00046;transporterHHPC00227	none
Solyc01g034150.2	0	0	0	0	0	0	0	0	0	0	0	0	0	0	0	0	0	DNA polymerase IV (AHRD V1 *-** C9SBX6_VERA1)%3B contains Interpro domain(s) IPR017061 DNA polymerase eta	DNA REPAIR POLYMERASE UMUC _ TRANSFERASE FAMILY MEMBER	none	mitosisHHGO:0007067;chromosome segregationHHGO:0007059	none	none	none
Solyc01g034160.1	1	1	0	-1	0	0	1	0	0	0	0	0	0	0	0	0	0	Pol polyprotein (AHRD V1 ***- Q94FM1_CITPA)%3B contains Interpro domain(s) IPR013103 Reverse transcriptase%2C RNA-dependent DNA polymerase	#N/A	#N/A	#N/A	#N/A	#N/A	#N/A
Solyc01g044270.2	0	0	0	0	0	0	0	0	0	0	0	0	0	0	0	0	0	Chaperone protein dnaJ 49 (AHRD V1 *-*- DNJ49_ARATH)%3B contains Interpro domain(s) IPR003095 Heat shock protein DnaJ	DNAJ HOMOLOG SUBFAMILY C MEMBER	none	none	none	none	none
Solyc01g044290.1	1	1	0	-1	0	0	1	1	0	0	0	0	0	0	0	0	0	Ulp1 protease family C-terminal catalytic domain containing protein (AHRD V1 ***- Q60D46_SOLDE)%3B contains Interpro domain(s) IPR015410 Region of unknown function DUF1985 ;_Length	FAMILY NOT NAMED	none	none	none	none	none
Solyc01g044330.1	0	1	0	0	0	0	0	0	0	0	0	0	0	0	0	0	0	Ulp1 protease family C-terminal catalytic domain containing protein (AHRD V1 ***- Q60D46_SOLDE)	FAMILY NOT NAMED	none	none	none	none	none
Solyc01g044340.2	0	0	0	0	0	0	0	0	0	0	0	0	0	0	0	0	0	Os09g0513800 protein (Fragment) (AHRD V1 *-*- Q0J0E7_ORYSJ)	#N/A	#N/A	#N/A	#N/A	#N/A	#N/A
Solyc01g044360.2	0	0	0	0	0	0	0	0	0	0	0	0	0	0	0	0	0	Importin beta-3 (AHRD V1 **-- Q16TN4_AEDAE)%3B contains Interpro domain(s) IPR011989 Armadillo-like helical	IMPORTIN BETA	transporter activityHHGO:0005215;bindingHHGO:0005488	localizationHHGO:0051179;cellular component biogenesisHHGO:0044085;protein complex assemblyHHGO:0006461;transportHHGO:0006810;protein transportHHGO:0015031;protein targetingHHGO:0006605;intracellular protein transportHHGO:0006886;protein complex biogenesisHHGO:0070271;cellular component organizationHHGO:0016043;cellular processHHGO:0009987;nuclear transportHHGO:0051169;protein localizationHHGO:00…	cytoplasmHHGO:0005737;cell partHHGO:0044464;organelleHHGO:0043226;membraneHHGO:0016020;nucleusHHGO:0005634;intracellularHHGO:0005622;nuclear envelopeHHGO:0005635	G-protein modulatorHHPC00022;transfer_carrier proteinHHPC00219;transporterHHPC00227;enzyme modulatorHHPC00095	none
Solyc01g044490.2	0	0	0	0	0	0	0	0	0	0	0	0	0	0	0	0	0	Elongation factor P family protein expressed (AHRD V1 ***- Q10BS5_ORYSJ)%3B contains Interpro domain(s) IPR015365 Elongation factor P%2C C-terminal	#N/A	#N/A	#N/A	#N/A	#N/A	#N/A
Solyc01g047590.1	0	0	0	0	0	0	0	0	0	0	0	0	0	0	0	0	0	Signal recognition particle protein (AHRD V1 ***- B0XFF2_CULQU)	SIGNAL RECOGNITION PARTICLE 72	bindingHHGO:0005488	none	cytoplasmHHGO:0005737;cell partHHGO:0044464;ribonucleoprotein complexHHGO:0030529;intracellularHHGO:0005622;macromolecular complexHHGO:0032991	none	none
Solyc01g049650.2	-1	-1	0	1	0	0	0	0	0	0	0	0	0	0	0	0	0	Pyruvate kinase (AHRD V1 ***- B9SBM7_RICCO)%3B contains Interpro domain(s) IPR001697 Pyruvate kinase	PYRUVATE KINASE	none	none	none	none	none
Solyc01g049680.2	0	0	0	0	0	0	0	0	0	0	0	0	0	0	0	0	0	Transcriptional activator protein Pur-alpha (AHRD V1 *-*- C1BSV9_9MAXI)%3B contains Interpro domain(s) IPR006628 PUR-alpha/beta/gamma%2C DNA/RNA-binding	#N/A	#N/A	#N/A	#N/A	#N/A	#N/A
Solyc01g049690.2	0	0	0	0	0	0	0	0	0	0	0	0	0	0	0	0	0	Transcriptional activator protein Pur-alpha (AHRD V1 ***- C1BSV9_9MAXI)%3B contains Interpro domain(s) IPR006628 PUR-alpha/beta/gamma%2C DNA/RNA-binding	PUR-TRANSCRIPTIONAL ACTIVATOR	nucleic acid bindingHHGO:0003676;sequence-specific DNA binding transcription factor activityHHGO:0003700;single-stranded DNA bindingHHGO:0003697;bindingHHGO:0005488;DNA bindingHHGO:0003677	transcription, DNA-dependentHHGO:0006351;transcription from RNA polymerase II promoterHHGO:0006366;nucleobase-containing compound metabolic processHHGO:0006139;primary metabolic processHHGO:0044238;metabolic processHHGO:0008152	none	DNA binding proteinHHPC00009;transcription factorHHPC00218;nucleic acid bindingHHPC00171	none
Solyc01g049700.2	0	0	0	0	0	0	0	0	0	0	0	0	0	0	0	0	0	Retrotransposon gag protein (AHRD V1 *--- Q0KIS1_SOLDE)%3B contains Interpro domain(s) IPR000953 Chromo domain	#N/A	#N/A	#N/A	#N/A	#N/A	#N/A
Solyc01g049770.2	0	0	0	0	0	0	0	0	0	0	-1	-1	-1	-1	-1	0	0	Unknown Protein (AHRD V1)	#N/A	#N/A	#N/A	#N/A	#N/A	#N/A
Solyc01g049810.2	0	0	0	0	0	0	0	0	0	0	0	0	0	0	0	0	0	Pentatricopeptide repeat-containing protein (AHRD V1 ***- D7MLP6_ARALY)%3B contains Interpro domain(s) IPR002885 Pentatricopeptide repeat	FAMILY NOT NAMED	nucleic acid bindingHHGO:0003676;RNA bindingHHGO:0003723;transmembrane transporter activityHHGO:0022857;transferase activityHHGO:0016740;bindingHHGO:0005488;catalytic activityHHGO:0003824;transmembrane receptor protein kinase activityHHGO:0019199;transmembrane receptor protein serine_threonine kinase activityHHGO:0004675;receptor activityHHGO:0004872;transporter activityHHGO:0005215;kinase activi…	intracellular protein transportHHGO:0006886;protein phosphorylationHHGO:0006468;protein metabolic processHHGO:0019538;cellular protein modification processHHGO:0006464;metabolic processHHGO:0008152;transportHHGO:0006810;protein transportHHGO:0015031;primary metabolic processHHGO:0044238	none	protein kinase receptorHHPC00194;protein kinaseHHPC00193;serine_threonine protein kinase receptorHHPC00205;transporterHHPC00227;transferaseHHPC00220;RNA binding proteinHHPC00031;kinaseHHPC00137;receptorHHPC00197;nucleic acid bindingHHPC00171	none
Solyc01g049880.2	0	0	0	0	0	0	0	0	0	0	0	0	0	0	0	0	0	Unknown Protein (AHRD V1)	#N/A	#N/A	#N/A	#N/A	#N/A	#N/A
Solyc01g049890.2	0	0	0	0	0	0	0	0	0	0	0	0	0	0	0	0	0	Unknown Protein (AHRD V1)	FAMILY NOT NAMED	none	none	none	none	none
Solyc01g049900.2	0	0	0	0	0	0	0	0	0	0	0	0	0	0	0	0	0	Membrane-bound transcription factor protease site 2 (AHRD V1 ***- Q4V9P5_DANRE)	PROTEASE M50 MEMBRANE-BOUND TRANSCRIPTION FACTOR SITE 2 PROTEASE	none	none	none	none	none
Solyc01g049910.2	0	0	0	0	0	0	0	0	0	0	0	0	0	0	0	0	0	Unknown Protein (AHRD V1)	#N/A	#N/A	#N/A	#N/A	#N/A	#N/A
Solyc01g049960.2	0	0	0	0	0	0	1	0	1	0	0	0	0	0	0	0	0	Unknown Protein (AHRD V1)	FAMILY NOT NAMED	none	none	none	none	none
Solyc01g049970.1	1	1	0	0	0	0	0	0	1	0	0	0	0	0	0	0	0	Ulp1 protease family C-terminal catalytic domain containing protein (AHRD V1 *-*- Q60D46_SOLDE)	SENTRIN_SUMO-SPECIFIC PROTEASE	hydrolase activityHHGO:0016787;cysteine-type peptidase activityHHGO:0008234;peptidase activityHHGO:0008233;catalytic activityHHGO:0003824	cellular processHHGO:0009987;protein metabolic processHHGO:0019538;primary metabolic processHHGO:0044238;cellular protein modification processHHGO:0006464;metabolic processHHGO:0008152	cell partHHGO:0044464;organelleHHGO:0043226;nucleusHHGO:0005634;intracellularHHGO:0005622	proteaseHHPC00190;hydrolaseHHPC00121	none
Solyc01g050000.2	0	0	0	0	0	0	0	0	0	0	0	0	0	0	0	0	0	HAT family dimerisation domain containing protein (AHRD V1 ***- Q2R149_ORYSJ)	#N/A	#N/A	#N/A	#N/A	#N/A	#N/A
Solyc01g050010.2	0	1	0	-1	0	0	0	0	0	0	-1	0	0	0	0	0	0	HAT family dimerisation domain containing protein (AHRD V1 *-*- Q2R194_ORYSJ)%3B contains Interpro domain(s) IPR008906 HAT dimerisation	#N/A	#N/A	#N/A	#N/A	#N/A	#N/A
Solyc01g050040.2	-1	0	0	0	0	0	0	0	0	0	0	0	0	0	0	0	0	RING finger protein 13 (AHRD V1 *-*- RNF13_CHICK)%3B contains Interpro domain(s) IPR018957 Zinc finger%2C C3HC4 RING-type	RING ZINC FINGER PROTEIN	none	catabolic processHHGO:0009056;cellular processHHGO:0009987;protein metabolic processHHGO:0019538;primary metabolic processHHGO:0044238;metabolic processHHGO:0008152;proteolysisHHGO:0006508;cellular protein modification processHHGO:0006464	none	none	none
Solyc01g050070.2	0	0	0	0	0	0	0	0	0	0	0	0	0	0	0	0	0	Genomic DNA chromosome 3 P1 clone MRP15 (AHRD V1 *-*- Q9LJF0_ARATH)	FAMILY NOT NAMED	none	none	none	none	none
Solyc01g056210.1	0	1	0	0	0	0	0	0	0	0	0	0	0	0	0	0	0	Unknown Protein (AHRD V1)%3B contains Interpro domain(s) IPR015410 Region of unknown function DUF1985	FAMILY NOT NAMED	none	none	none	none	none
Solyc01g056250.2	-1	0	0	0	0	0	-1	0	-1	0	0	0	0	0	0	0	0	S-locus F-box-like protein d (AHRD V1 ***- B0F0G0_PETIN)%3B contains Interpro domain(s) IPR001810 Cyclin-like F-box	#N/A	#N/A	#N/A	#N/A	#N/A	#N/A
Solyc01g056310.2	0	0	1	0	0	0	0	1	0	0	0	0	0	0	0	0	0	Laccase-2 (AHRD V1 **-- LAC2_ORYSJ)%3B contains Interpro domain(s) IPR011707 Multicopper oxidase%2C type 3	MULTI-COPPER OXIDASE	oxidoreductase activityHHGO:0016491;bindingHHGO:0005488;catalytic activityHHGO:0003824	metabolic processHHGO:0008152	cell junctionHHGO:0030054;cell partHHGO:0044464;external encapsulating structureHHGO:0030312;cell wallHHGO:0005618	oxidaseHHPC00175;oxidoreductaseHHPC00176;ligaseHHPC00142	none
Solyc01g056330.1	0	0	0	0	0	0	0	0	0	0	0	0	0	0	0	0	0	DNA-directed RNA polymerase subunit beta%26apos%26apos (AHRD V1 ***- D3WBD0_9BORA)	#N/A	#N/A	#N/A	#N/A	#N/A	#N/A
Solyc01g056340.2	0	0	0	0	0	0	0	0	0	0	0	0	0	0	0	0	0	DET1-like protein (AHRD V1 ***- D0EW63_ORYSI)%3B contains Interpro domain(s) IPR019138 De-etiolated protein 1%2C Det1	DET1 HOMOLOG DE-ETIOLATED-1 HOMOLOG	ligase activityHHGO:0016874;ubiquitin-protein ligase activityHHGO:0004842;catalytic activityHHGO:0003824	protein metabolic processHHGO:0019538;primary metabolic processHHGO:0044238;proteolysisHHGO:0006508;metabolic processHHGO:0008152	none	ubiquitin-protein ligaseHHPC00234;ligaseHHPC00142	none
Solyc01g056370.2	-1	-1	0	0	0	0	1	1	0	0	0	0	0	0	0	0	0	Unknown Protein (AHRD V1)	#N/A	#N/A	#N/A	#N/A	#N/A	#N/A
Solyc01g056430.1	0	0	0	0	0	0	0	0	0	0	0	0	0	0	0	0	0	Amidohydrolase family (AHRD V1 **-- B4VKN3_9CYAN)%3B contains Interpro domain(s) IPR006992 Amidohydrolase 2 ;_Length	#N/A	#N/A	#N/A	#N/A	#N/A	#N/A
Solyc01g056440.1	0	0	0	0	0	0	0	0	0	0	0	0	0	0	0	0	0	Nodulin / glutamate-ammonia ligase-like protein (AHRD V1 *-*- Q8W4B7_ARATH)	#N/A	#N/A	#N/A	#N/A	#N/A	#N/A
Solyc01g056450.1	0	0	0	0	0	0	0	0	0	0	0	0	0	0	0	0	0	Glutamine synthetase I (AHRD V1 ***- Q9SC91_MEDTR)%3B contains Interpro domain(s) IPR008146 Glutamine synthetase%2C catalytic region ;_Length	FAMILY NOT NAMED	ligase activityHHGO:0016874;catalytic activityHHGO:0003824	cellular amino acid metabolic processHHGO:0006520;nitrogen compound metabolic processHHGO:0006807;primary metabolic processHHGO:0044238;metabolic processHHGO:0008152;cellular amino acid biosynthetic processHHGO:0008652	none	ligaseHHPC00142	Glutamine glutamate conversionHHP02745 Glutamine synthetaseHHP02968;Glutamine glutamate conversionHHP02745 Glutamine synthaseHHP04483
Solyc01g056480.2	0	0	0	0	0	0	-1	0	-1	0	0	0	0	0	0	0	0	Unknown Protein (AHRD V1)	#N/A	#N/A	#N/A	#N/A	#N/A	#N/A
Solyc01g056490.1	0	1	0	0	0	0	0	0	0	0	-1	0	-1	0	0	-1	0	Ulp1 protease family C-terminal catalytic domain containing protein (AHRD V1 *-*- Q60D46_SOLDE)%3B contains Interpro domain(s) IPR003653 Peptidase C48%2C SUMO/Sentrin/Ubl1 ;_Length	FAMILY NOT NAMED	none	none	none	none	none
Solyc01g056510.1	0	0	0	0	0	0	0	1	-1	0	0	0	0	0	0	0	0	HAT family dimerisation domain containing protein (AHRD V1 ***- Q2R194_ORYSJ)%3B contains Interpro domain(s) IPR008906 HAT dimerisation ;_Length	#N/A	#N/A	#N/A	#N/A	#N/A	#N/A
Solyc01g056520.2	0	0	0	0	0	0	0	0	0	0	0	0	0	0	0	0	0	RAN binding protein 16-like (AHRD V1 **-* Q9LHS4_ARATH)%3B contains Interpro domain(s) IPR001494 Importin-beta%2C N-terminal	EXPORTIN 4,7-RELATED	protein bindingHHGO:0005515;transporter activityHHGO:0005215;bindingHHGO:0005488	localizationHHGO:0051179;intracellular protein transportHHGO:0006886;cellular processHHGO:0009987;nuclear transportHHGO:0051169;protein localizationHHGO:0008104;transportHHGO:0006810;protein transportHHGO:0015031	cytoplasmHHGO:0005737;cell partHHGO:0044464;nucleusHHGO:0005634;integral to membraneHHGO:0016021;protein complexHHGO:0043234;intracellularHHGO:0005622;macromolecular complexHHGO:0032991;nuclear envelopeHHGO:0005635;membraneHHGO:0016020;organelleHHGO:0043226	transfer_carrier proteinHHPC00219	none
Solyc01g056530.1	0	0	-1	0	0	0	1	0	1	0	0	0	0	0	0	0	0	Oligopeptide transporter 9 (AHRD V1 ***- B6SVF4_MAIZE)%3B contains Interpro domain(s) IPR004813 Oligopeptide transporter OPT superfamily ;_Length	ISP4 LIKE PROTEIN	none	none	none	none	none
Solyc01g056570.2	0	0	0	0	0	0	0	0	0	0	0	0	0	0	0	0	0	Regulator of chromosome condensation (RCC1)-like protein (AHRD V1 *--- D0NM06_PHYIN)%3B contains Interpro domain(s) IPR009091 Regulator of chromosome condensation/beta-lactamase-inhibitor protein II	REGULATOR OF CHROMOSOME CONDENSATION	small GTPase regulator activityHHGO:0005083;nucleic acid bindingHHGO:0003676;protein bindingHHGO:0005515;bindingHHGO:0005488;enzyme regulator activityHHGO:0030234;chromatin bindingHHGO:0003682;guanyl-nucleotide exchange factor activityHHGO:0005085	nucleobase-containing compound transportHHGO:0015931;transportHHGO:0006810;mitosisHHGO:0007067;cell cycleHHGO:0007049;cellular processHHGO:0009987;nucleobase-containing compound metabolic processHHGO:0006139;primary metabolic processHHGO:0044238;metabolic processHHGO:0008152	none	DNA binding proteinHHPC00009;guanyl-nucleotide exchange factorHHPC00113;chromatin_chromatin-binding proteinHHPC00077;G-protein modulatorHHPC00022;enzyme modulatorHHPC00095;nucleic acid bindingHHPC00171	none
Solyc01g056580.2	0	0	-1	0	0	0	0	0	1	0	0	0	0	0	0	0	0	L-aspartate oxidase (AHRD V1 ***- D7M6M9_ARALY)%3B contains Interpro domain(s) IPR004112 Fumarate reductase/succinate dehydrogenase flavoprotein%2C C-terminal	FAMILY NOT NAMED	oxidoreductase activityHHGO:0016491;catalytic activityHHGO:0003824	carbohydrate metabolic processHHGO:0005975;respiratory electron transport chainHHGO:0022904;primary metabolic processHHGO:0044238;oxidative phosphorylationHHGO:0006119;generation of precursor metabolites and energyHHGO:0006091;metabolic processHHGO:0008152	none	oxidaseHHPC00175;dehydrogenaseHHPC00092;oxidoreductaseHHPC00176	none
Solyc01g056600.2	0	0	0	0	0	0	0	0	0	0	0	0	0	0	0	0	0	Ribonuclease 3 (AHRD V1 *-*- RNC_THEFY)%3B contains Interpro domain(s) IPR001159 Double-stranded RNA binding	#N/A	#N/A	#N/A	#N/A	#N/A	#N/A
Solyc01g056610.1	0	0	0	0	0	0	0	0	0	0	0	0	0	0	0	0	0	Unknown Protein (AHRD V1)	#N/A	#N/A	#N/A	#N/A	#N/A	#N/A
Solyc01g056620.2	-1	-1	0	0	0	0	0	0	0	0	0	0	0	0	0	0	0	DsRNA-binding protein (AHRD V1 *-*- B5BUY7_ARATH)%3B contains Interpro domain(s) IPR001159 Double-stranded RNA binding	EUKARYOTE SPECIFIC DSRNA BINDING PROTEIN	none	localizationHHGO:0051179;RNA localizationHHGO:0006403	none	none	none
Solyc01g056650.1	0	0	0	0	0	0	0	0	0	0	0	0	0	0	0	0	0	Starch synthase (AHRD V1 ***- O65365_IPOBA)	#N/A	#N/A	#N/A	#N/A	#N/A	#N/A
Solyc01g056670.1	0	0	0	0	0	0	0	0	0	0	0	0	0	0	0	0	0	NADH-quinone oxidoreductase subunit K (AHRD V1 ***- C9YGI3_9BURK)%3B contains Interpro domain(s) IPR001133 NADH:ubiquinone/quinone oxidoreductase%2C chain 4L ;_Length	#N/A	#N/A	#N/A	#N/A	#N/A	#N/A
Solyc01g056680.1	-1	1	0	0	1	-1	0	0	0	0	0	0	0	0	0	-1	0	Unknown Protein (AHRD V1)	FAMILY NOT NAMED	none	none	none	none	none
Solyc01g056690.2	0	0	0	0	0	0	0	0	0	0	0	0	0	0	0	0	0	Kinase family protein (AHRD V1 ***- D7LFV3_ARALY)%3B contains Interpro domain(s) IPR014045 Protein phosphatase 2C%2C N-terminal	SERINE-THREONINE PROTEIN KINASE	transferase activityHHGO:0016740;non-membrane spanning protein tyrosine kinase activityHHGO:0004715;catalytic activityHHGO:0003824;kinase activityHHGO:0016301;protein kinase activityHHGO:0004672	response to stimulusHHGO:0050896;response to stressHHGO:0006950;cell cycleHHGO:0007049;protein phosphorylationHHGO:0006468;protein metabolic processHHGO:0019538;cellular processHHGO:0009987;primary metabolic processHHGO:0044238;phosphate-containing compound metabolic processHHGO:0006796;metabolic processHHGO:0008152;cellular protein modification processHHGO:0006464	none	non-receptor serine_threonine protein kinaseHHPC00167;protein kinaseHHPC00193;non-receptor tyrosine protein kinaseHHPC00168;transferaseHHPC00220;kinaseHHPC00137	none
Solyc01g056720.2	0	0	0	0	0	0	0	0	0	0	0	0	0	0	0	0	0	Aquaporin SIP12 (AHRD V1 ***- D8FSL5_GOSHI)%3B contains Interpro domain(s) IPR000425 Major intrinsic protein	AQUAPORIN TRANSPORTER	transmembrane transporter activityHHGO:0022857;transporter activityHHGO:0005215;carbohydrate transmembrane transporter activityHHGO:0015144	biological regulationHHGO:0065007;localizationHHGO:0051179;homeostatic processHHGO:0042592;cellular processHHGO:0009987;carbohydrate transportHHGO:0008643;ion transportHHGO:0006811;transportHHGO:0006810	cell partHHGO:0044464;membraneHHGO:0016020;integral to membraneHHGO:0016021;plasma membraneHHGO:0005886	amino acid transporterHHPC00046;transporterHHPC00227	none
Solyc01g056730.1	0	-1	0	0	0	0	0	1	0	0	0	0	0	0	0	0	0	Unknown Protein (AHRD V1)	#N/A	#N/A	#N/A	#N/A	#N/A	#N/A
Solyc01g056750.1	0	0	1	0	0	0	0	1	-1	0	0	0	0	0	0	0	0	Os11g0573200 protein (Fragment) (AHRD V1 *-*- Q0IS21_ORYSJ)	ZINC FINGER CCHC DOMAIN CONTAINING PROTEIN	nucleic acid bindingHHGO:0003676;bindingHHGO:0005488	lipid metabolic processHHGO:0006629;steroid metabolic processHHGO:0008202;nucleobase-containing compound metabolic processHHGO:0006139;primary metabolic processHHGO:0044238;metabolic processHHGO:0008152	none	nucleic acid bindingHHPC00171	none
Solyc01g056760.2	0	0	1	0	0	0	0	1	0	0	0	0	0	0	0	0	0	DNA-binding protein HEXBP (AHRD V1 *--* HEXP_LEIMA)%3B contains Interpro domain(s) IPR001878 Zinc finger%2C CCHC-type	ZINC FINGER CCHC DOMAIN CONTAINING PROTEIN	nucleic acid bindingHHGO:0003676;bindingHHGO:0005488	lipid metabolic processHHGO:0006629;steroid metabolic processHHGO:0008202;nucleobase-containing compound metabolic processHHGO:0006139;primary metabolic processHHGO:0044238;metabolic processHHGO:0008152	none	nucleic acid bindingHHPC00171	none
Solyc01g056770.1	0	0	0	0	0	0	0	1	-1	0	0	0	0	0	0	0	0	Unknown Protein (AHRD V1)	#N/A	#N/A	#N/A	#N/A	#N/A	#N/A
Solyc01g056780.2	0	0	0	0	0	0	0	0	0	0	0	0	0	0	0	0	0	50S ribosomal protein L34 (AHRD V1 *-*- D7KDQ0_ARALY)%3B contains Interpro domain(s) IPR000271 Ribosomal protein L34	FAMILY NOT NAMED	none	none	none	none	none
Solyc01g056790.2	0	0	0	0	0	0	0	0	0	0	0	0	0	0	0	0	0	Exostosin-like (AHRD V1 ***- Q2HVN7_MEDTR)%3B contains Interpro domain(s) IPR004263 Exostosin-like	#N/A	#N/A	#N/A	#N/A	#N/A	#N/A
Solyc01g056800.1	0	0	0	0	0	0	0	0	0	0	0	0	0	0	0	0	0	Exostosin-like (AHRD V1 ***- Q2HVN7_MEDTR)%3B contains Interpro domain(s) IPR004263 Exostosin-like ;_Length	EXOSTOSIN HEPARAN SULFATE GLYCOSYLTRANSFERASE -RELATED	transferase activityHHGO:0016740;transferase activity, transferring glycosyl groupsHHGO:0016757;catalytic activityHHGO:0003824	polysaccharide metabolic processHHGO:0005976;protein metabolic processHHGO:0019538;carbohydrate metabolic processHHGO:0005975;protein glycosylationHHGO:0006486;primary metabolic processHHGO:0044238;cellular protein modification processHHGO:0006464;metabolic processHHGO:0008152	none	glycosyltransferaseHHPC00111;transferaseHHPC00220	none
Solyc01g056810.2	-1	-1	0	0	0	0	0	0	0	0	0	0	0	0	0	0	0	Syntaxin (AHRD V1 ***- Q6X9V9_HORVD)%3B contains Interpro domain(s) IPR010989 t-SNARE	SYNTAXIN	protein bindingHHGO:0005515;SNAP receptor activityHHGO:0005484;bindingHHGO:0005488	localizationHHGO:0051179;exocytosisHHGO:0006887;organelle organizationHHGO:0006996;transportHHGO:0006810;protein transportHHGO:0015031;vesicle-mediated transportHHGO:0016192;intracellular protein transportHHGO:0006886;cellular component organizationHHGO:0016043;cellular processHHGO:0009987;protein localizationHHGO:0008104	cytoplasmHHGO:0005737;cell partHHGO:0044464;integral to membraneHHGO:0016021;protein complexHHGO:0043234;intracellularHHGO:0005622;macromolecular complexHHGO:0032991;SNARE complexHHGO:0031201;membraneHHGO:0016020;plasma membraneHHGO:0005886	SNARE proteinHHPC00034;membrane traffic proteinHHPC00150	Nicotinic acetylcholine receptor signaling pathwayHHP00044 SNARE ComplexHHP01091;Muscarinic acetylcholine receptor 2 and 4 signaling pathwayHHP00043 SNARE ComplexHHP01079
Solyc01g056820.1	0	0	0	0	0	0	0	0	0	0	0	0	0	0	0	0	0	Methionine aminopeptidase (AHRD V1 ***- A5ALU5_VITVI)%3B contains Interpro domain(s) IPR015706 RNA-directed DNA polymerase (reverse transcriptase)%2C related	#N/A	#N/A	#N/A	#N/A	#N/A	#N/A
Solyc01g056830.2	0	-1	0	0	0	0	0	0	0	0	0	0	0	0	0	0	0	Syntaxin (Fragment) (AHRD V1 *-*- A0F0A7_NICBE)	SYNTAXIN	protein bindingHHGO:0005515;SNAP receptor activityHHGO:0005484;bindingHHGO:0005488	localizationHHGO:0051179;exocytosisHHGO:0006887;organelle organizationHHGO:0006996;transportHHGO:0006810;protein transportHHGO:0015031;vesicle-mediated transportHHGO:0016192;intracellular protein transportHHGO:0006886;cellular component organizationHHGO:0016043;cellular processHHGO:0009987;protein localizationHHGO:0008104	cytoplasmHHGO:0005737;cell partHHGO:0044464;integral to membraneHHGO:0016021;protein complexHHGO:0043234;intracellularHHGO:0005622;macromolecular complexHHGO:0032991;SNARE complexHHGO:0031201;membraneHHGO:0016020;plasma membraneHHGO:0005886	SNARE proteinHHPC00034;membrane traffic proteinHHPC00150	Nicotinic acetylcholine receptor signaling pathwayHHP00044 SNARE ComplexHHP01091;Muscarinic acetylcholine receptor 2 and 4 signaling pathwayHHP00043 SNARE ComplexHHP01079
Solyc01g056850.2	0	0	0	0	0	0	0	0	0	0	0	0	0	0	0	0	0	CTP synthase (AHRD V1 ***- B6U7R1_MAIZE)%3B contains Interpro domain(s) IPR004468 CTP synthase	CTP SYNTHASE	ligase activityHHGO:0016874;catalytic activityHHGO:0003824	pyrimidine nucleobase metabolic processHHGO:0006206;nucleobase-containing compound metabolic processHHGO:0006139;primary metabolic processHHGO:0044238;metabolic processHHGO:0008152	none	ligaseHHPC00142	De novo pyrimidine ribonucleotides biosythesisHHP02740 CTP synthaseHHP02931
Solyc01g056860.1	0	0	0	0	0	0	0	0	0	0	0	0	0	0	0	0	0	Pol polyprotein (AHRD V1 ***- Q94FM1_CITPA)	#N/A	#N/A	#N/A	#N/A	#N/A	#N/A
Solyc01g056890.1	0	0	0	0	0	0	0	0	0	0	0	0	0	0	0	0	0	Unknown Protein (AHRD V1)	FAMILY NOT NAMED	none	none	none	none	none
Solyc01g056910.1	0	0	0	0	0	0	0	0	0	0	0	0	0	0	0	0	0	Protease Do-like 7 (AHRD V1 *-*- DEGP7_ARATH)	SERINE PROTEASE FAMILY S1C HTRA-RELATED	hydrolase activityHHGO:0016787;serine-type peptidase activityHHGO:0008236;peptidase activityHHGO:0008233;catalytic activityHHGO:0003824	cellular processHHGO:0009987;protein metabolic processHHGO:0019538;protein foldingHHGO:0006457;primary metabolic processHHGO:0044238;proteolysisHHGO:0006508;metabolic processHHGO:0008152	none	serine proteaseHHPC00203;proteaseHHPC00190;chaperoneHHPC00072;hydrolaseHHPC00121	none
Solyc01g056940.2	0	0	0	0	0	0	0	0	0	0	0	0	0	0	0	0	0	Ubiquitin (AHRD V1 ***- D3PHG3_9MAXI)%3B contains Interpro domain(s) IPR019956 Ubiquitin subgroup	UBIQUITIN	structural constituent of ribosomeHHGO:0003735;nucleic acid bindingHHGO:0003676;structural molecule activityHHGO:0005198;bindingHHGO:0005488	protein metabolic processHHGO:0019538;primary metabolic processHHGO:0044238;proteolysisHHGO:0006508;metabolic processHHGO:0008152	none	ribosomal proteinHHPC00202;RNA binding proteinHHPC00031;nucleic acid bindingHHPC00171	none
Solyc01g056980.2	0	0	0	0	0	0	0	0	0	0	0	0	0	0	0	0	0	Unknown Protein (AHRD V1)	#N/A	#N/A	#N/A	#N/A	#N/A	#N/A
Solyc01g056990.2	0	0	0	0	0	0	0	0	0	0	0	0	0	0	0	0	0	Genomic DNA chromosome 5 BAC clone F15M7 (AHRD V1 ***- Q9FG11_ARATH)	FAMILY NOT NAMED	none	none	none	none	none
Solyc01g057000.2	-1	-1	0	0	0	0	0	0	0	0	1	0	1	0	0	0	0	Universal stress protein family protein (AHRD V1 ***- D7LAT3_ARALY)%3B contains Interpro domain(s) IPR006016 UspA	FAMILY NOT NAMED	none	none	none	none	none
Solyc01g057020.2	0	0	0	0	0	0	0	0	0	0	0	0	0	0	0	0	0	PDE320 (AHRD V1 ***- D7L613_ARALY)	FAMILY NOT NAMED	none	none	none	none	none
Solyc01g057040.2	0	0	0	0	0	0	0	0	0	0	0	0	0	0	0	0	0	PDE320 (AHRD V1 ***- D7L613_ARALY)	FAMILY NOT NAMED	none	none	none	none	none
Solyc01g057090.2	0	0	0	0	0	0	0	0	0	0	0	0	0	0	0	0	0	Rhodopsin-like receptor (AHRD V1 ***- B6TUA3_MAIZE)%3B contains Interpro domain(s) IPR019358 Protein of unknown function DUF2215	FAMILY NOT NAMED	none	none	none	none	none
Solyc01g057170.2	0	-1	0	0	0	0	0	0	1	0	0	0	0	0	0	0	0	Unknown Protein (AHRD V1)	#N/A	#N/A	#N/A	#N/A	#N/A	#N/A
Solyc01g057200.2	0	0	0	0	0	0	0	0	0	0	0	0	0	0	0	0	0	Pentatricopeptide repeat-containing protein (AHRD V1 ***- D7MMK8_ARALY)%3B contains Interpro domain(s) IPR002885 Pentatricopeptide repeat	FAMILY NOT NAMED	nucleic acid bindingHHGO:0003676;RNA bindingHHGO:0003723;transmembrane transporter activityHHGO:0022857;transferase activityHHGO:0016740;bindingHHGO:0005488;catalytic activityHHGO:0003824;transmembrane receptor protein kinase activityHHGO:0019199;transmembrane receptor protein serine_threonine kinase activityHHGO:0004675;receptor activityHHGO:0004872;transporter activityHHGO:0005215;kinase activi…	intracellular protein transportHHGO:0006886;protein phosphorylationHHGO:0006468;protein metabolic processHHGO:0019538;cellular protein modification processHHGO:0006464;metabolic processHHGO:0008152;transportHHGO:0006810;protein transportHHGO:0015031;primary metabolic processHHGO:0044238	none	protein kinase receptorHHPC00194;protein kinaseHHPC00193;serine_threonine protein kinase receptorHHPC00205;transporterHHPC00227;transferaseHHPC00220;RNA binding proteinHHPC00031;kinaseHHPC00137;receptorHHPC00197;nucleic acid bindingHHPC00171	none
Solyc01g057210.2	0	0	0	0	0	0	0	0	0	0	0	0	0	0	0	0	0	Pyruvate dehydrogenase kinase (AHRD V1 **** Q700B0_CICAR)%3B contains Interpro domain(s) IPR018955 Branched-chain alpha-ketoacid dehydrogenase kinase/Pyruvate dehydrogenase kinase%2C mitochondrial	PYRUVATE DEHYDROGENASE KINASE	transferase activityHHGO:0016740;catalytic activityHHGO:0003824;kinase activityHHGO:0016301;protein kinase activityHHGO:0004672	cellular amino acid metabolic processHHGO:0006520;protein phosphorylationHHGO:0006468;cellular amino acid catabolic processHHGO:0009063;cellular processHHGO:0009987;protein metabolic processHHGO:0019538;metabolic processHHGO:0008152;regulation of cellular amino acid metabolic processHHGO:0006521;cellular protein modification processHHGO:0006464;primary metabolic processHHGO:0044238	none	protein kinaseHHPC00193;transferaseHHPC00220;kinaseHHPC00137	none
Solyc01g057240.1	0	0	0	0	0	0	0	0	0	0	0	0	0	0	0	0	0	50S ribosomal protein L3-2 (AHRD V1 *-*- B6TFD9_MAIZE)%3B contains Interpro domain(s) IPR000597 Ribosomal protein L3 ;_Length	#N/A	#N/A	#N/A	#N/A	#N/A	#N/A
Solyc01g057250.1	0	0	0	0	0	0	0	0	0	0	0	0	0	0	0	0	0	50S ribosomal protein L3-2 (AHRD V1 *-*- B6TFD9_MAIZE)%3B contains Interpro domain(s) IPR000597 Ribosomal protein L3 ;_Length	#N/A	#N/A	#N/A	#N/A	#N/A	#N/A
Solyc01g057270.2	0	0	0	0	0	0	0	0	0	0	0	0	0	0	0	0	0	Calmodulin-binding transcription activator 1 (AHRD V1 **** Q0WQF9_ARATH)%3B contains Interpro domain(s) IPR005559 CG-1	CALMODULIN-BINDING TRANSCRIPTION ACTIVATOR CAMTA	nucleic acid bindingHHGO:0003676;nucleic acid binding transcription factor activityHHGO:0001071;sequence-specific DNA binding transcription factor activityHHGO:0003700;bindingHHGO:0005488;sequence-specific DNA binding RNA polymerase II transcription factor activityHHGO:0000981;DNA bindingHHGO:0003677	regulation of biological processHHGO:0050789;transcription, DNA-dependentHHGO:0006351;regulation of transcription from RNA polymerase II promoterHHGO:0006357;RNA metabolic processHHGO:0016070;nitrogen compound metabolic processHHGO:0006807;regulation of nucleobase-containing compound metabolic processHHGO:0019219;biological regulationHHGO:0065007;biosynthetic processHHGO:0009058;cellular processH…	cell partHHGO:0044464;organelleHHGO:0043226;nucleusHHGO:0005634;intracellularHHGO:0005622	transcription factorHHPC00218	none
Solyc01g057300.1	0	-1	0	0	0	0	0	0	0	0	0	0	0	0	0	0	0	Transcription factor bHLH95 (AHRD V1 **** BH095_ARATH)%3B contains Interpro domain(s) IPR011598 Helix-loop-helix DNA-binding	MYC	none	none	none	none	p53 pathway feedback loops 2HHP04398 MycHHP04649;Wnt signaling pathwayHHP00057 Wnt Target GenesHHG01558;Oxidative stress responseHHP00046 MycHHP01124;PDGF signaling pathwayHHP00047 c-MycHHP01172
Solyc01g057310.2	0	0	0	0	0	0	0	0	0	0	-1	0	0	0	0	0	0	Kinesin (Centromeric protein)-like protein (AHRD V1 *-*- Q9LJ60_ARATH)	FAMILY NOT NAMED	none	none	none	none	none
Solyc01g057320.1	0	0	0	0	0	0	0	0	0	0	-1	0	0	0	0	0	0	Kinesin-like protein (AHRD V1 ***- Q75LL2_ORYSJ)%3B contains Interpro domain(s) IPR001752 Kinesin%2C motor region	FAMILY NOT NAMED	pyrophosphatase activityHHGO:0016462;hydrolase activityHHGO:0016787;microtubule motor activityHHGO:0003777;motor activityHHGO:0003774;catalytic activityHHGO:0003824	catabolic processHHGO:0009056;cellular processHHGO:0009987;cellular component movementHHGO:0006928;nucleobase-containing compound metabolic processHHGO:0006139;nitrogen compound metabolic processHHGO:0006807;metabolic processHHGO:0008152;phosphate-containing compound metabolic processHHGO:0006796;primary metabolic processHHGO:0044238	cell partHHGO:0044464;cytoskeletonHHGO:0005856;organelleHHGO:0043226;protein complexHHGO:0043234;intracellularHHGO:0005622;macromolecular complexHHGO:0032991	microtubule family cytoskeletal proteinHHPC00157;cytoskeletal proteinHHPC00085;microtubule binding motor proteinHHPC00156	none
Solyc01g057340.2	1	0	0	0	0	0	-1	0	-1	0	0	0	0	0	0	1	1	Unknown Protein (AHRD V1)	#N/A	#N/A	#N/A	#N/A	#N/A	#N/A
Solyc01g057350.1	0	0	0	0	0	0	-1	0	0	0	0	0	0	0	0	0	0	Unknown Protein (AHRD V1)	#N/A	#N/A	#N/A	#N/A	#N/A	#N/A
Solyc01g057360.1	1	1	0	-1	0	0	0	1	0	0	-1	0	-1	0	0	0	0	Poly polymerase catalytic domain containing protein expressed (AHRD V1 *--- Q84T80_ORYSJ)%3B contains Interpro domain(s) IPR012317 Poly(ADP-ribose) polymerase%2C catalytic region ;_Length	FAMILY NOT NAMED	none	none	none	none	none
Solyc01g057370.1	1	1	1	-1	0	-1	0	0	0	0	0	0	0	0	0	0	0	Poly polymerase catalytic domain containing protein expressed (AHRD V1 *--- Q336N6_ORYSJ)%3B contains Interpro domain(s) IPR012317 Poly(ADP-ribose) polymerase%2C catalytic region ;_Length	FAMILY NOT NAMED	none	none	none	none	none
Solyc01g057390.2	1	1	0	0	0	0	0	0	0	0	0	0	0	0	0	0	0	Unknown Protein (AHRD V1)	#N/A	#N/A	#N/A	#N/A	#N/A	#N/A
Solyc01g057440.2	1	0	0	0	0	0	0	0	-1	0	0	0	0	0	0	0	0	Unknown Protein (AHRD V1)	#N/A	#N/A	#N/A	#N/A	#N/A	#N/A
Solyc01g057450.1	0	0	0	0	0	0	0	-1	1	0	0	0	0	0	0	-1	0	Unknown Protein (AHRD V1)	FAMILY NOT NAMED	none	none	none	none	none
Solyc01g057460.2	1	0	0	0	0	0	0	0	0	0	0	0	0	0	0	0	0	CTV.22 (AHRD V1 ***- Q8H6Q7_PONTR)	FAMILY NOT NAMED	none	none	none	none	none
Solyc01g057490.2	0	0	1	0	0	0	0	0	0	0	0	0	0	0	0	0	0	Unknown Protein (AHRD V1)	#N/A	#N/A	#N/A	#N/A	#N/A	#N/A
Solyc01g057510.1	0	1	0	0	0	0	0	0	0	0	0	0	0	0	0	0	1	Bax inhibitor 1 (AHRD V1 ***- C6GAD3_CAPAN)	BAX INHIBITOR-RELATED	none	none	none	none	Apoptosis signaling pathwayHHP00006 Bi1HHP00277
Solyc01g057520.2	1	1	0	0	0	0	0	0	0	0	0	0	-1	0	0	0	0	Genomic DNA chromosome 3 P1 clone MGD8 (AHRD V1 *--- Q9LUT8_ARATH)%3B contains Interpro domain(s) IPR011989 Armadillo-like helical	IMPORTIN-7, 8, 11	transporter activityHHGO:0005215	localizationHHGO:0051179;protein targetingHHGO:0006605;intracellular protein transportHHGO:0006886;cellular processHHGO:0009987;nuclear transportHHGO:0051169;protein localizationHHGO:0008104;transportHHGO:0006810;protein transportHHGO:0015031	cytoplasmHHGO:0005737;cell partHHGO:0044464;cytosolHHGO:0005829;organelleHHGO:0043226;nucleusHHGO:0005634;intracellularHHGO:0005622;nuclear envelopeHHGO:0005635	small GTPaseHHPC00208;G-proteinHHPC00020;transporterHHPC00227;enzyme modulatorHHPC00095	none
Solyc01g057570.2	0	0	0	0	0	0	0	0	0	0	0	0	0	0	0	0	0	Alkylated DNA repair protein alkB (AHRD V1 **-- D0NI62_PHYIN)	UNCHARACTERIZED	none	none	none	none	none
Solyc01g057610.1	1	1	0	0	0	0	0	0	0	0	0	0	0	0	0	-1	0	Unknown Protein (AHRD V1)	#N/A	#N/A	#N/A	#N/A	#N/A	#N/A
Solyc01g057690.1	0	0	0	0	0	0	0	0	0	0	-1	0	0	0	0	0	0	Unknown Protein (AHRD V1)	#N/A	#N/A	#N/A	#N/A	#N/A	#N/A
Solyc01g057730.1	0	0	0	0	0	0	0	0	-1	0	0	0	0	0	0	0	0	Unknown Protein (AHRD V1)	#N/A	#N/A	#N/A	#N/A	#N/A	#N/A
Solyc01g057750.1	1	1	0	0	0	0	0	0	0	0	-1	0	-1	0	0	0	-1	DNAJ heat shock N-terminal domain-containing protein (AHRD V1 ***- D7LYH1_ARALY)%3B contains Interpro domain(s) IPR015609 Molecular chaperone%2C heat shock protein%2C Hsp40%2C DnaJ	RING FINGER DOMAIN-CONTAINING, POLYCOMB GROUP COMPONENT	ubiquitin-protein ligase activityHHGO:0004842	cellular protein modification processHHGO:0006464	none	ubiquitin-protein ligaseHHPC00234	none
Solyc01g057760.2	0	0	0	0	0	0	0	0	0	0	0	0	0	0	0	0	0	ATP dependent RNA helicase (AHRD V1 *-*- B3LNW9_YEAS1)%3B contains Interpro domain(s) IPR011545 DNA/RNA helicase%2C DEAD/DEAH box type%2C N-terminal	RNA HELICASE	pyrophosphatase activityHHGO:0016462;hydrolase activityHHGO:0016787;RNA helicase activityHHGO:0003724;helicase activityHHGO:0004386;catalytic activityHHGO:0003824	catabolic processHHGO:0009056;cellular processHHGO:0009987;nucleobase-containing compound metabolic processHHGO:0006139;RNA metabolic processHHGO:0016070;nitrogen compound metabolic processHHGO:0006807;metabolic processHHGO:0008152;phosphate-containing compound metabolic processHHGO:0006796;primary metabolic processHHGO:0044238	cytoplasmHHGO:0005737;cell partHHGO:0044464;mitochondrionHHGO:0005739;organelleHHGO:0043226;intracellularHHGO:0005622	helicaseHHPC00115;RNA binding proteinHHPC00031;RNA helicaseHHPC00032;nucleic acid bindingHHPC00171	none
Solyc01g057770.2	0	-1	0	0	0	0	0	0	0	0	0	0	0	0	0	0	0	AE family transporter anion exchange (AHRD V1 *--* A4RY02_OSTLU)%3B contains Interpro domain(s) IPR003020 Bicarbonate transporter%2C eukaryotic	ANION EXCHANGE PROTEIN	transmembrane transporter activityHHGO:0022857;transporter activityHHGO:0005215	biological regulationHHGO:0065007;localizationHHGO:0051179;homeostatic processHHGO:0042592;cellular processHHGO:0009987;anion transportHHGO:0006820;ion transportHHGO:0006811;transportHHGO:0006810	cell partHHGO:0044464;membraneHHGO:0016020;integral to membraneHHGO:0016021;plasma membraneHHGO:0005886	transporterHHPC00227	none
Solyc01g057780.2	0	0	0	0	0	0	0	0	0	0	0	0	0	0	0	0	0	Zinc finger protein VAR3%2C chloroplastic (AHRD V1 **-- VAR3_ARATH)%3B contains Interpro domain(s) IPR001876 Zinc finger%2C RanBP2-type	ZINC FINGER PROTEIN	none	none	none	none	none
Solyc01g057830.2	0	0	0	0	0	1	0	0	0	0	0	0	0	0	0	0	0	30S ribosomal protein S1 (AHRD V1 **-- B4FUZ5_MAIZE)%3B contains Interpro domain(s) IPR003029 Ribosomal protein S1%2C RNA binding domain	S1 RNA-BINDING DOMAIN-CONTAINING PROTEIN 1	none	none	none	none	none
Solyc01g057840.2	0	0	0	0	0	0	0	0	0	0	0	0	0	0	0	0	0	Serologically defined colon cancer antigen 1 (Fragment) (AHRD V1 **-- C7TZM6_SCHJA)%3B contains Interpro domain(s) IPR008532 Protein of unknown function DUF814	UNCHARACTERIZED	none	none	none	none	none
Solyc01g057850.2	0	0	0	0	0	0	0	0	0	0	0	0	0	0	0	0	0	Serologically defined colon cancer antigen 1 (Fragment) (AHRD V1 *--- C7TZM6_SCHJA)%3B contains Interpro domain(s) IPR008532 Protein of unknown function DUF814	UNCHARACTERIZED	none	none	none	none	none
Solyc01g057880.1	1	1	0	0	0	0	0	0	0	0	-1	0	0	0	0	0	0	Ulp1 protease family C-terminal catalytic domain containing protein (AHRD V1 *-*- Q60D46_SOLDE)%3B contains Interpro domain(s) IPR003653 Peptidase C48%2C SUMO/Sentrin/Ubl1 ;_Length	SENTRIN_SUMO-SPECIFIC PROTEASE	hydrolase activityHHGO:0016787;cysteine-type peptidase activityHHGO:0008234;peptidase activityHHGO:0008233;catalytic activityHHGO:0003824	cellular processHHGO:0009987;protein metabolic processHHGO:0019538;primary metabolic processHHGO:0044238;cellular protein modification processHHGO:0006464;metabolic processHHGO:0008152	cell partHHGO:0044464;organelleHHGO:0043226;nucleusHHGO:0005634;intracellularHHGO:0005622	proteaseHHPC00190;hydrolaseHHPC00121	none
Solyc01g057890.1	0	1	0	0	0	0	-1	0	-1	0	0	0	0	0	0	0	0	Mutator-like transposase (AHRD V1 *-*- Q9LTL3_ARATH)%3B contains Interpro domain(s) IPR018289 MULE transposase%2C conserved domain	FAMILY NOT NAMED	none	mitosisHHGO:0007067	none	none	none
Solyc01g057900.2	0	0	0	0	0	0	0	0	0	0	0	0	0	0	0	0	0	Ubiquitin-protein ligase (AHRD V1 *-** Q17BV9_AEDAE)%3B contains Interpro domain(s) IPR000569 HECT	HECT DOMAIN UBIQUITIN-PROTEIN LIGASE	none	cellular processHHGO:0009987;protein metabolic processHHGO:0019538;primary metabolic processHHGO:0044238;cellular protein modification processHHGO:0006464;metabolic processHHGO:0008152	cytoplasmHHGO:0005737;cell partHHGO:0044464;intracellularHHGO:0005622	ubiquitin-protein ligaseHHPC00234;ligaseHHPC00142	Ubiquitin proteasome pathwayHHP00060 E3HHP01490
Solyc01g058010.2	0	0	0	0	0	0	0	0	0	0	0	0	0	0	0	0	0	Neutral invertase (AHRD V1 ***- A7LH71_VITVI)%3B contains Interpro domain(s) IPR006937 Plant neutral invertase	FAMILY NOT NAMED	none	none	none	none	none
Solyc01g058020.2	0	0	0	0	0	0	1	0	1	0	0	0	0	0	0	0	0	Neutral invertase (AHRD V1 ***- A7LH71_VITVI)%3B contains Interpro domain(s) IPR006937 Plant neutral invertase	FAMILY NOT NAMED	none	none	none	none	none
Solyc01g058050.1	1	0	0	0	0	0	0	0	0	0	0	0	0	0	0	0	0	Unknown Protein (AHRD V1)	#N/A	#N/A	#N/A	#N/A	#N/A	#N/A
Solyc01g058130.1	0	0	-1	0	0	0	-1	0	-1	0	0	0	0	0	0	0	0	Unknown Protein (AHRD V1)%3B contains Interpro domain(s) IPR007087 Zinc finger%2C C2H2-type ;_Length	#N/A	#N/A	#N/A	#N/A	#N/A	#N/A
Solyc01g058140.2	0	0	0	0	0	0	0	0	0	0	0	0	0	0	0	0	0	Beta-glucosidase A (AHRD V1 *-** B5YCI2_DICT6)%3B contains Interpro domain(s) IPR018120 Glycoside hydrolase%2C family 1%2C active site IPR001360 Glycoside hydrolase%2C family 1	GLYCOSYL HYDROLASE	hydrolase activityHHGO:0016787;glucosidase activityHHGO:0015926;hydrolase activity, hydrolyzing O-glycosyl compoundsHHGO:0004553;catalytic activityHHGO:0003824	metabolic processHHGO:0008152	none	none	none
Solyc01g058160.2	0	0	0	0	0	0	0	0	0	0	0	0	0	0	0	0	0	Agenet domain-containing protein (AHRD V1 ***- D7L5I9_ARALY)%3B contains Interpro domain(s) IPR008395 Agenet	FAMILY NOT NAMED	none	none	none	none	none
Solyc01g058170.2	0	0	0	0	0	0	0	0	0	0	0	0	0	0	0	0	0	Agenet domain-containing protein (AHRD V1 ***- D7L5I9_ARALY)%3B contains Interpro domain(s) IPR008395 Agenet	FAMILY NOT NAMED	none	none	none	none	none
Solyc01g058190.2	-1	0	0	0	0	0	0	0	0	0	0	0	0	0	0	0	0	30S ribosomal protein S6 (AHRD V1 *-*- B4WXW0_9GAMM)%3B contains Interpro domain(s) IPR000529 Ribosomal protein S6	MITOCHONDRIAL 28S RIBOSOMAL PROTEIN S6	structural constituent of ribosomeHHGO:0003735;nucleic acid bindingHHGO:0003676;RNA bindingHHGO:0003723;structural molecule activityHHGO:0005198;bindingHHGO:0005488	none	none	none	none
Solyc01g058210.1	0	1	0	0	0	0	-1	0	0	0	0	0	-1	0	0	0	1	Gelsolin (AHRD V1 **-- Q9DGQ5_DANRE)%3B contains Interpro domain(s) IPR007122 Gelsolin	VILLIN	cytoskeletal protein bindingHHGO:0008092;protein bindingHHGO:0005515;structural molecule activityHHGO:0005198;structural constituent of cytoskeletonHHGO:0005200;actin bindingHHGO:0003779;bindingHHGO:0005488	cellular component organizationHHGO:0016043;cellular processHHGO:0009987	cytoskeletonHHGO:0005856;actin cytoskeletonHHGO:0015629;intracellularHHGO:0005622	actin family cytoskeletal proteinHHPC00041;cytoskeletal proteinHHPC00085;non-motor actin binding proteinHHPC00165	none
Solyc01g058260.2	-1	-1	0	0	0	0	0	0	0	0	0	0	1	0	0	0	0	Poly(A) polymerase (AHRD V1 ***- Q56XM9_ARATH)%3B contains Interpro domain(s) IPR007012 Poly(A) polymerase%2C central region	POLY A POLYMERASE	transferase activityHHGO:0016740;catalytic activityHHGO:0003824;nucleotidyltransferase activityHHGO:0016779	mRNA 3'-end processingHHGO:0031124;RNA metabolic processHHGO:0016070;nitrogen compound metabolic processHHGO:0006807;mRNA polyadenylationHHGO:0006378;mRNA processingHHGO:0006397;cellular processHHGO:0009987;nucleobase-containing compound metabolic processHHGO:0006139;primary metabolic processHHGO:0044238;metabolic processHHGO:0008152	cell partHHGO:0044464;organelleHHGO:0043226;nucleusHHGO:0005634;intracellularHHGO:0005622	mRNA polyadenylation factorHHPC00146;mRNA processing factorHHPC00147;RNA binding proteinHHPC00031;nucleic acid bindingHHPC00171	none
Solyc01g058270.2	0	0	0	0	0	0	0	0	0	0	0	0	0	0	0	-1	0	CAS1 domain containing 1 (AHRD V1 **-- B0W8N6_CULQU)%3B contains Interpro domain(s) IPR012419 Cas1p-like	FAMILY NOT NAMED	none	none	none	none	none
Solyc01g058280.2	0	0	0	1	0	0	0	0	0	0	0	0	0	0	0	0	0	Transmembrane protein 93 (AHRD V1 ***- B0WGS0_CULQU)%3B contains Interpro domain(s) IPR008504 Protein of unknown function DUF786	UNCHARACTERIZED	none	response to external stimulusHHGO:0009605;response to stimulusHHGO:0050896;cellular component biogenesisHHGO:0044085;response to stressHHGO:0006950;organelle organizationHHGO:0006996;protein foldingHHGO:0006457;catabolic processHHGO:0009056;cell communicationHHGO:0007154;cellular component organizationHHGO:0016043;cellular processHHGO:0009987;protein metabolic processHHGO:0019538;primary metaboli…	cytoplasmHHGO:0005737;cell partHHGO:0044464;integral to membraneHHGO:0016021;protein complexHHGO:0043234;intracellularHHGO:0005622;macromolecular complexHHGO:0032991;nuclear outer membrane-endoplasmic reticulum membrane networkHHGO:0042175;membraneHHGO:0016020;endoplasmic reticulumHHGO:0005783;organelleHHGO:0043226	none	none
Solyc01g058310.1	1	0	1	0	0	0	-1	0	-1	0	0	0	0	0	0	1	0	Unknown Protein (AHRD V1)	#N/A	#N/A	#N/A	#N/A	#N/A	#N/A
Solyc01g058320.2	-1	0	-1	0	0	0	0	0	0	0	0	0	0	0	0	0	0	T6A9.7 protein (AHRD V1 *-*- Q9FZ23_ARATH)	FAMILY NOT NAMED	none	none	none	none	none
Solyc01g058340.1	1	1	0	0	0	0	0	0	0	0	-1	0	-1	0	0	0	0	Unknown Protein (AHRD V1)	#N/A	#N/A	#N/A	#N/A	#N/A	#N/A
Solyc01g058360.1	0	1	0	0	0	0	-1	0	0	0	0	0	0	0	0	-1	0	Major facilitator superfamily transporter (AHRD V1 **-- A8NUY3_COPC7)%3B contains Interpro domain(s) IPR016196 Major facilitator superfamily%2C general substrate transporter ;_Length	FAMILY NOT NAMED	transporter activityHHGO:0005215	localizationHHGO:0051179;cellular processHHGO:0009987;transportHHGO:0006810	membraneHHGO:0016020;integral to membraneHHGO:0016021	none	none
Solyc01g058380.1	1	0	0	0	0	0	0	0	0	0	0	0	0	0	0	0	0	Coatomer subunit gamma (AHRD V1 ***- B6SV32_MAIZE)%3B contains Interpro domain(s) IPR002553 Clathrin/coatomer adaptor%2C adaptin-like%2C N-terminal ;_Length	COATOMER SUBUNIT GAMMA	none	intracellular protein transportHHGO:0006886;vesicle-mediated transportHHGO:0016192;protein transportHHGO:0015031;transportHHGO:0006810	cytoplasmHHGO:0005737;vesicle coatHHGO:0030120;intracellularHHGO:0005622	vesicle coat proteinHHPC00235;membrane traffic proteinHHPC00150	none
Solyc01g058390.2	0	0	0	0	0	0	0	0	0	0	0	0	0	0	0	0	0	Galactokinase (AHRD V1 **** B6V3B9_CUCME)%3B contains Interpro domain(s) IPR000705 Galactokinase	MEVALONATE KINASE_GALACTOKINASE	carbohydrate kinase activityHHGO:0019200;transferase activityHHGO:0016740;catalytic activityHHGO:0003824;kinase activityHHGO:0016301	monosaccharide metabolic processHHGO:0005996;carbohydrate metabolic processHHGO:0005975;primary metabolic processHHGO:0044238;metabolic processHHGO:0008152	none	transferaseHHPC00220;kinaseHHPC00137;carbohydrate kinaseHHPC00065	Fructose galactose metabolismHHP02744 GalactokinaseHHP02960
Solyc01g058400.1	0	0	0	0	0	0	0	0	0	0	0	0	0	0	0	0	0	Unknown Protein (AHRD V1)	#N/A	#N/A	#N/A	#N/A	#N/A	#N/A
Solyc01g058410.1	1	0	0	0	0	0	0	0	0	0	0	0	0	0	0	1	0	Unknown Protein (AHRD V1)	CYTOCHROME C OXIDASE, SUBUNIT II	oxidoreductase activityHHGO:0016491;catalytic activityHHGO:0003824	intracellular protein transportHHGO:0006886;cellular processHHGO:0009987;respiratory electron transport chainHHGO:0022904;protein transportHHGO:0015031;generation of precursor metabolites and energyHHGO:0006091;transportHHGO:0006810	none	oxidoreductaseHHPC00176	none
Solyc01g058430.1	0	0	0	0	0	0	0	0	0	0	0	0	0	0	0	0	0	Mutator-like transposase (AHRD V1 *-*- Q9SKM2_ARATH)%3B contains Interpro domain(s) IPR004332 Transposase%2C MuDR%2C plant ;_Length	FAMILY NOT NAMED	none	mitosisHHGO:0007067	none	none	none
Solyc01g058450.2	0	0	0	0	0	0	0	0	0	0	0	0	0	0	0	0	0	RNA binding protein (AHRD V1 *--* B6UFA0_MAIZE)%3B contains Interpro domain(s) IPR015903 Ribonucleoprotein%2C BRUNO-like	RNA BINDING PROTEIN	none	none	none	none	none
Solyc01g058490.1	-1	-1	1	1	0	0	0	1	-1	0	0	0	0	0	-1	0	0	Unknown Protein (AHRD V1)	#N/A	#N/A	#N/A	#N/A	#N/A	#N/A
Solyc01g058500.2	-1	-1	1	1	0	0	1	1	-1	0	0	0	0	1	-1	0	0	Unknown Protein (AHRD V1)	#N/A	#N/A	#N/A	#N/A	#N/A	#N/A
Solyc01g058510.1	0	0	0	-1	0	0	0	0	0	0	0	0	0	0	-1	1	0	Unknown Protein (AHRD V1)	#N/A	#N/A	#N/A	#N/A	#N/A	#N/A
Solyc01g058520.2	0	-1	0	0	0	0	0	0	0	0	0	0	0	0	0	0	0	Peroxidase 40 (AHRD V1 ***- D7M9X0_ARALY)%3B contains Interpro domain(s) IPR002016 Haem peroxidase%2C plant/fungal/bacterial	FAMILY NOT NAMED	none	none	none	none	none
Solyc01g058530.2	0	0	0	0	0	0	0	0	0	0	0	0	0	0	0	0	0	30S ribosomal protein S18 family (AHRD V1 *-*- D7KH00_ARALY)%3B contains Interpro domain(s) IPR001648 Ribosomal protein S18	30S RIBOSOMAL PROTEIN S18	structural constituent of ribosomeHHGO:0003735;structural molecule activityHHGO:0005198	biosynthetic processHHGO:0009058;cellular processHHGO:0009987;protein metabolic processHHGO:0019538;primary metabolic processHHGO:0044238;translationHHGO:0006412;metabolic processHHGO:0008152	none	ribosomal proteinHHPC00202;RNA binding proteinHHPC00031;nucleic acid bindingHHPC00171	none
Solyc01g058540.2	-1	0	0	0	0	0	0	0	0	-1	0	0	0	0	0	-1	0	WRKY transcription factor 31 (AHRD V1 *-*- C9DI20_9ROSI)%3B contains Interpro domain(s) IPR003657 DNA-binding WRKY	FAMILY NOT NAMED	none	none	none	none	none
Solyc01g058550.1	0	-1	0	0	0	0	0	0	0	0	0	0	0	0	0	0	0	Unknown Protein (AHRD V1)	#N/A	#N/A	#N/A	#N/A	#N/A	#N/A
Solyc01g058590.1	0	1	-1	0	1	0	0	0	0	0	0	0	0	0	0	-1	0	Ubiquitin-like domain containing CTD phosphatase 1 (AHRD V1 ***- B6TA38_MAIZE)%3B contains Interpro domain(s) IPR000626 Ubiquitin	FAMILY NOT NAMED	none	none	none	none	none
Solyc01g058650.2	1	1	0	0	0	0	0	1	-1	0	0	0	0	0	0	1	0	Prefoldin subunit 3 (AHRD V1 *-*- B6TIR1_MAIZE)	PREFOLDIN SUBUNIT 3	cytoskeletal protein bindingHHGO:0008092;protein bindingHHGO:0005515;bindingHHGO:0005488	cellular component biogenesisHHGO:0044085;protein complex biogenesisHHGO:0070271;cellular component organizationHHGO:0016043;cellular processHHGO:0009987;protein complex assemblyHHGO:0006461	cytoplasmHHGO:0005737;cell partHHGO:0044464;cytosolHHGO:0005829;ribonucleoprotein complexHHGO:0030529;protein complexHHGO:0043234;intracellularHHGO:0005622;macromolecular complexHHGO:0032991	chaperoneHHPC00072	none
Solyc01g058660.1	1	0	0	0	0	0	0	0	-1	0	0	0	0	0	0	1	0	Unknown Protein (AHRD V1)	#N/A	#N/A	#N/A	#N/A	#N/A	#N/A
Solyc01g058670.2	0	-1	0	0	0	0	0	0	0	0	0	0	0	0	0	0	0	Transcription factor (AHRD V1 *-** D7L4N5_ARALY)	FAMILY NOT NAMED	none	none	none	none	none
Solyc01g058720.2	-1	0	-1	1	0	1	0	0	0	0	0	0	0	0	0	0	0	NaCl-inducible Ca2+-binding protein (AHRD V1 **-* O22368_ARATH)%3B contains Interpro domain(s) IPR011992 EF-Hand type	EF-HAND CALCIUM-BINDING DOMAIN CONTAINING PROTEIN	calcium ion bindingHHGO:0005509;bindingHHGO:0005488	none	none	intracellular calcium-sensing proteinHHPC00131;calmodulinHHPC00061;signaling moleculeHHPC00207;calcium-binding proteinHHPC00060;enzyme modulatorHHPC00095	none
Solyc01g058730.2	0	0	0	0	0	0	0	0	0	0	0	0	0	0	0	0	0	Os03g0310500 protein (Fragment) (AHRD V1 *-*- Q0DSF8_ORYSJ)	FAMILY NOT NAMED	none	none	none	none	none
Solyc01g058740.2	1	1	0	0	0	0	0	0	0	0	-1	0	0	0	0	0	0	Unknown Protein (AHRD V1)	FAMILY NOT NAMED	none	none	none	none	none
Solyc01g059740.1	-1	-1	-1	0	1	1	0	0	0	-1	0	-1	0	0	0	-1	0	Unknown Protein (AHRD V1)	FAMILY NOT NAMED	none	none	none	none	none
Solyc01g059760.1	1	1	-1	0	1	0	0	0	0	-1	-1	0	-1	0	0	0	0	Ulp1 protease family C-terminal catalytic domain containing protein (AHRD V1 *-*- Q60D46_SOLDE)%3B contains Interpro domain(s) IPR003653 Peptidase C48%2C SUMO/Sentrin/Ubl1 ;_Length	FAMILY NOT NAMED	none	none	none	none	none
Solyc01g059830.2	-1	0	0	-1	0	0	0	0	0	0	0	0	0	0	0	0	0	Enoyl-CoA hydratase (AHRD V1 ***- C1K4P1_ELAOL)%3B contains Interpro domain(s) IPR001753 Crotonase%2C core	FAMILY NOT NAMED	transferase activity, transferring acyl groupsHHGO:0016746;ligase activityHHGO:0016874;transferase activityHHGO:0016740;acetyltransferase activityHHGO:0016407;racemase and epimerase activityHHGO:0016854;catalytic activityHHGO:0003824;hydro-lyase activityHHGO:0016836;lyase activityHHGO:0016829;isomerase activityHHGO:0016853;oxidoreductase activityHHGO:0016491	lipid metabolic processHHGO:0006629;vitamin metabolic processHHGO:0006766;fatty acid metabolic processHHGO:0006631;coenzyme metabolic processHHGO:0006732;fatty acid beta-oxidationHHGO:0006635;vitamin biosynthetic processHHGO:0009110;carbohydrate metabolic processHHGO:0005975;primary metabolic processHHGO:0044238;metabolic processHHGO:0008152	none	epimerase_racemaseHHPC00096;acetyltransferaseHHPC00038;oxidoreductaseHHPC00176;dehydrogenaseHHPC00092;acyltransferaseHHPC00042;isomeraseHHPC00135;transferaseHHPC00220;ligaseHHPC00142;lyaseHHPC00144;hydrataseHHPC00120	none
Solyc01g059840.1	-1	1	-1	-1	1	0	1	0	1	-1	0	0	0	-1	0	-1	0	GDSL esterase/lipase At4g16230 (AHRD V1 **** GDL64_ARATH)%3B contains Interpro domain(s) IPR001087 Lipase%2C GDSL	ZINC FINGER FYVE DOMAIN CONTAINING PROTEIN	none	none	none	none	none
Solyc01g059860.2	-1	-1	-1	0	0	0	0	0	1	0	0	0	0	0	0	0	0	Kinase family protein (AHRD V1 ***- D7L5X4_ARALY)%3B contains Interpro domain(s) IPR002290 Serine/threonine protein kinase	SERINE-THREONINE PROTEIN KINASE	transferase activityHHGO:0016740;non-membrane spanning protein tyrosine kinase activityHHGO:0004715;catalytic activityHHGO:0003824;kinase activityHHGO:0016301;protein kinase activityHHGO:0004672	induction of apoptosisHHGO:0006917;signal transductionHHGO:0007165;developmental processHHGO:0032502;MAPK cascadeHHGO:0000165;protein phosphorylationHHGO:0006468;cell communicationHHGO:0007154;cellular processHHGO:0009987;I-kappaB kinase_NF-kappaB cascadeHHGO:0007249;cellular component morphogenesisHHGO:0032989;cellular protein modification processHHGO:0006464;phosphate-containing compound metabo…	none	non-receptor serine_threonine protein kinaseHHPC00167;protein kinaseHHPC00193;non-receptor tyrosine protein kinaseHHPC00168;transferaseHHPC00220;kinaseHHPC00137	Insulin_IGF pathway-mitogen activated protein kinase kinase_MAP kinase cascadeHHP00032 RafHHP00893
Solyc01g059870.2	0	-1	0	0	0	0	0	0	0	0	0	0	0	0	0	0	0	Phytochrome B1	FAMILY NOT NAMED	none	none	cell partHHGO:0044464;organelleHHGO:0043226;nucleusHHGO:0005634;intracellularHHGO:0005622	esteraseHHPC00097;protein kinaseHHPC00193;transcription factorHHPC00218;transferaseHHPC00220;kinaseHHPC00137;hydrolaseHHPC00121	none
Solyc01g059880.2	1	1	0	0	0	0	0	0	0	0	-1	0	-1	0	0	0	0	ATP citrate lyase a-subunit (AHRD V1 **** Q93YH4_LUPAL)%3B contains Interpro domain(s) IPR016141 Citrate synthase-like%2C core	#N/A	#N/A	#N/A	#N/A	#N/A	#N/A
Solyc01g059890.1	1	0	0	0	0	0	0	0	0	0	0	0	0	0	0	0	0	Unknown Protein (AHRD V1)	#N/A	#N/A	#N/A	#N/A	#N/A	#N/A
Solyc01g059910.2	-1	-1	0	1	1	0	1	1	0	0	0	0	0	0	0	-1	0	Pto-like%2C Serine/threonine kinase protein%2C resistance protein	FAMILY NOT NAMED	none	none	none	none	none
Solyc01g059920.2	0	1	0	0	0	0	0	0	0	0	0	0	0	0	0	0	0	Genomic DNA chromosome 3 TAC clone K14A17 (AHRD V1 ***- Q9LSP4_ARATH)%3B contains Interpro domain(s) IPR016027 Nucleic acid-binding%2C OB-fold-like	FAMILY NOT NAMED	none	none	none	none	none
Solyc01g059930.2	-1	-1	-1	0	0	0	0	0	1	0	1	0	0	0	0	0	0	Universal stress protein (AHRD V1 ***- D6BRD7_9ROSI)%3B contains Interpro domain(s) IPR006016 UspA	FAMILY NOT NAMED	none	none	none	none	none
Solyc01g059980.2	0	0	0	0	0	0	0	0	0	0	0	0	0	0	0	0	0	Beta-glucanase (AHRD V1 ***- Q53X08_NICPL)%3B contains Interpro domain(s) IPR000490 Glycoside hydrolase%2C family 17	FAMILY NOT NAMED	hydrolase activityHHGO:0016787;hydrolase activity, hydrolyzing O-glycosyl compoundsHHGO:0004553;carbohydrate bindingHHGO:0030246;bindingHHGO:0005488;catalytic activityHHGO:0003824	metabolic processHHGO:0008152	cell partHHGO:0044464;membraneHHGO:0016020;plasma membraneHHGO:0005886	none	none
Solyc01g060030.2	0	0	-1	0	0	0	0	0	0	0	0	0	0	0	0	0	0	Zinc finger CCHC domain-containing protein 10 (AHRD V1 *-*- B6TKA1_MAIZE)	ZCCHC10 PROTEIN	none	none	none	none	none
Solyc01g060040.2	0	0	0	0	0	0	0	0	0	0	0	0	0	0	0	0	0	Bromodomain and WD repeat-containing protein 1 (Predicted) (AHRD V1 *-*- B4USY4_OTOGA)%3B contains Interpro domain(s) IPR001487 Bromodomain	WD REPEAT DOMAIN 9	none	transcription, DNA-dependentHHGO:0006351;regulation of transcription from RNA polymerase II promoterHHGO:0006357;RNA metabolic processHHGO:0016070;developmental processHHGO:0032502;cellular component organizationHHGO:0016043;biosynthetic processHHGO:0009058;cellular processHHGO:0009987;transcription from RNA polymerase II promoterHHGO:0006366;nucleobase-containing compound metabolic processHHGO:0…	cell partHHGO:0044464;organelleHHGO:0043226;nucleusHHGO:0005634;intracellularHHGO:0005622	none	none
Solyc01g060050.1	0	0	0	0	0	0	0	0	0	0	0	0	0	0	0	0	0	WD-40 repeat protein-like (AHRD V1 **-- Q9FGX4_ARATH)%3B contains Interpro domain(s) IPR020472 G-protein beta WD-40 repeat%2C region	#N/A	#N/A	#N/A	#N/A	#N/A	#N/A
Solyc01g060070.2	1	0	0	-1	0	0	0	0	0	0	0	0	0	0	0	0	0	Pore protein homolog (AHRD V1 **-- Q3EA11_ARATH)%3B contains Interpro domain(s) IPR003397 Mitochondrial inner membrane translocase complex%2C subunit Tim17/22	TIM23	transmembrane transporter activityHHGO:0022857;transporter activityHHGO:0005215	localizationHHGO:0051179;mitochondrial transportHHGO:0006839;organelle organizationHHGO:0006996;transportHHGO:0006810;protein transportHHGO:0015031;protein targetingHHGO:0006605;intracellular protein transportHHGO:0006886;cellular component organizationHHGO:0016043;mitochondrion organizationHHGO:0007005;cellular processHHGO:0009987;protein localizationHHGO:0008104	cytoplasmHHGO:0005737;cell partHHGO:0044464;mitochondrial inner membraneHHGO:0005743;integral to membraneHHGO:0016021;protein complexHHGO:0043234;intracellularHHGO:0005622;macromolecular complexHHGO:0032991;mitochondrionHHGO:0005739;membraneHHGO:0016020;organelleHHGO:0043226	amino acid transporterHHPC00046;transporterHHPC00227	none
Solyc01g060080.2	0	-1	0	0	0	0	0	0	0	0	0	0	0	0	0	0	0	Serine/threonine-protein phosphatase 4 regulatory subunit 3 (AHRD V1 **-- PP4R3_DANRE)%3B contains Interpro domain(s) IPR006887 Protein of unknown function DUF625	ATP SYNTHASE GAMMA-RELATED	none	none	none	none	none
Solyc01g060090.1	0	0	0	0	0	0	0	0	0	0	0	0	0	0	0	0	0	Serine/threonine-protein phosphatase 4 regulatory subunit 3 (AHRD V1 **-- PP4R3_DANRE)	ATP SYNTHASE GAMMA-RELATED	none	none	none	none	none
Solyc01g060100.2	0	0	0	0	0	0	0	0	0	0	0	0	0	0	0	0	0	Unknown Protein (AHRD V1)	#N/A	#N/A	#N/A	#N/A	#N/A	#N/A
Solyc01g060130.2	0	0	0	0	0	0	0	0	0	0	0	0	0	0	0	0	0	ADP-ribosylation factor-like protein 3 (AHRD V1 **-- ARL3_CAEEL)%3B contains Interpro domain(s) IPR006687 GTP-binding protein SAR1	ADP RIBOSYLATION FACTOR-RELATED	GTPase activityHHGO:0003924;hydrolase activityHHGO:0016787;protein bindingHHGO:0005515;bindingHHGO:0005488;catalytic activityHHGO:0003824	intracellular protein transportHHGO:0006886;vesicle-mediated transportHHGO:0016192;signal transductionHHGO:0007165;G-protein coupled receptor signaling pathwayHHGO:0007186;cellular processHHGO:0009987;cell surface receptor signaling pathwayHHGO:0007166;transportHHGO:0006810;protein transportHHGO:0015031	none	small GTPaseHHPC00208;G-proteinHHPC00020;enzyme modulatorHHPC00095	none
Solyc01g060140.2	0	0	0	0	0	0	0	0	0	0	0	0	0	0	0	0	0	Calmodulin-binding transcription activator 5 (AHRD V1 **** D7MA72_ARALY)%3B contains Interpro domain(s) IPR002110 Ankyrin	CALMODULIN-BINDING TRANSCRIPTION ACTIVATOR CAMTA	nucleic acid bindingHHGO:0003676;nucleic acid binding transcription factor activityHHGO:0001071;sequence-specific DNA binding transcription factor activityHHGO:0003700;bindingHHGO:0005488;sequence-specific DNA binding RNA polymerase II transcription factor activityHHGO:0000981;DNA bindingHHGO:0003677	regulation of biological processHHGO:0050789;transcription, DNA-dependentHHGO:0006351;regulation of transcription from RNA polymerase II promoterHHGO:0006357;RNA metabolic processHHGO:0016070;nitrogen compound metabolic processHHGO:0006807;regulation of nucleobase-containing compound metabolic processHHGO:0019219;biological regulationHHGO:0065007;biosynthetic processHHGO:0009058;cellular processH…	cell partHHGO:0044464;organelleHHGO:0043226;nucleusHHGO:0005634;intracellularHHGO:0005622	transcription factorHHPC00218	none
Solyc01g060150.2	0	0	0	0	0	0	0	0	0	0	0	0	0	0	0	0	0	Unknown Protein (AHRD V1)	#N/A	#N/A	#N/A	#N/A	#N/A	#N/A
Solyc01g060160.1	0	0	0	0	0	0	0	0	0	0	0	0	0	0	0	0	0	Unknown Protein (AHRD V1)	FAMILY NOT NAMED	none	none	none	none	none
Solyc01g060170.2	0	0	0	0	0	0	0	0	0	0	0	0	0	0	0	0	0	Calmodulin-binding transcription activator 5 (AHRD V1 ***- D7MA72_ARALY)%3B contains Interpro domain(s) IPR005559 CG-1	#N/A	#N/A	#N/A	#N/A	#N/A	#N/A
Solyc01g060180.2	1	0	0	0	0	0	0	0	0	0	0	0	0	0	0	0	0	AMP-dependent synthetase and ligase (AHRD V1 ***- A1U2F4_MARAV)%3B contains Interpro domain(s) IPR000873 AMP-dependent synthetase and ligase	FAMILY NOT NAMED	ligase activityHHGO:0016874;oxidoreductase activityHHGO:0016491;catalytic activityHHGO:0003824	lipid metabolic processHHGO:0006629;fatty acid metabolic processHHGO:0006631;cellular amino acid metabolic processHHGO:0006520;coenzyme metabolic processHHGO:0006732;primary metabolic processHHGO:0044238;metabolic processHHGO:0008152;cellular amino acid biosynthetic processHHGO:0008652	none	dehydrogenaseHHPC00092;oxidoreductaseHHPC00176;ligaseHHPC00142	none
Solyc01g060190.1	0	0	0	1	0	0	0	0	0	0	0	0	0	0	0	0	0	Mutator-like transposase (AHRD V1 *-*- Q94HK4_ORYSA)%3B contains Interpro domain(s) IPR006564 Zinc finger%2C PMZ-type ;_Length	FAMILY NOT NAMED	none	mitosisHHGO:0007067	none	none	none
Solyc01g060200.1	1	0	0	0	0	0	-1	-1	0	0	0	0	0	0	0	0	0	3%26apos-5%26apos exonuclease domain-containing protein-like (AHRD V1 ***- Q2V9B5_SOLTU)%3B contains Interpro domain(s) IPR002562 3'-5' exonuclease ;_Length	POLYMYOSITIS_SCLERODERMA AUTOANTIGEN-RELATED	hydrolase activityHHGO:0016787;hydrolase activity, acting on ester bondsHHGO:0016788;nucleic acid bindingHHGO:0003676;nuclease activityHHGO:0004518;exoribonuclease activityHHGO:0004532;bindingHHGO:0005488;catalytic activityHHGO:0003824	nucleobase-containing compound metabolic processHHGO:0006139;RNA metabolic processHHGO:0016070;rRNA metabolic processHHGO:0016072;metabolic processHHGO:0008152;primary metabolic processHHGO:0044238	none	RNA binding proteinHHPC00031;nucleaseHHPC00170;exoribonucleaseHHPC00099;nucleic acid bindingHHPC00171;hydrolaseHHPC00121	none
Solyc01g060210.2	1	0	1	0	0	0	-1	0	-1	0	0	0	0	0	0	0	0	X1 (Fragment) (AHRD V1 ***- Q3T7E6_ZEAMM)%3B contains Interpro domain(s) IPR005380 Region of unknown function XS	RIBONUCLEASE P SUBUNIT P38	hydrolase activityHHGO:0016787;hydrolase activity, acting on ester bondsHHGO:0016788;nuclease activityHHGO:0004518;catalytic activityHHGO:0003824;endoribonuclease activityHHGO:0004521	cellular processHHGO:0009987;nucleobase-containing compound metabolic processHHGO:0006139;RNA metabolic processHHGO:0016070;nitrogen compound metabolic processHHGO:0006807;metabolic processHHGO:0008152;primary metabolic processHHGO:0044238	cell partHHGO:0044464;nucleolusHHGO:0005730;organelleHHGO:0043226;ribonucleoprotein complexHHGO:0030529;nucleusHHGO:0005634;intracellularHHGO:0005622;macromolecular complexHHGO:0032991	esteraseHHPC00097;endoribonucleaseHHPC00094;RNA binding proteinHHPC00031;nucleaseHHPC00170;nucleic acid bindingHHPC00171;hydrolaseHHPC00121	none
Solyc01g060230.1	1	0	1	-1	0	0	0	1	-1	0	0	0	0	0	0	1	0	Unknown Protein (AHRD V1)	#N/A	#N/A	#N/A	#N/A	#N/A	#N/A
Solyc01g060240.2	-1	0	-1	0	0	-1	0	-1	1	0	1	0	0	0	0	-1	0	Unknown Protein (AHRD V1)%3B contains Interpro domain(s) IPR012482 Lg106-like	FAMILY NOT NAMED	none	none	none	none	none
Solyc01g060250.2	0	0	0	0	0	0	0	0	0	0	0	0	0	0	0	0	0	Unknown Protein (AHRD V1)	#N/A	#N/A	#N/A	#N/A	#N/A	#N/A
Solyc01g060260.2	0	0	0	0	0	0	0	0	0	0	0	0	0	0	0	0	0	Unknown Protein (AHRD V1)	FAMILY NOT NAMED	none	none	none	none	none
Solyc01g060280.2	0	0	0	0	0	0	0	0	0	0	0	0	0	0	0	0	0	STAM binding protein (AHRD V1 *--* B2W8T5_PYRTR)%3B contains Interpro domain(s) IPR000555 Mov34/MPN/PAD-1	AMSH	protein bindingHHGO:0005515;cytokine activityHHGO:0005125;receptor bindingHHGO:0005102;bindingHHGO:0005488	cellular processHHGO:0009987	none	cytokineHHPC00083;signaling moleculeHHPC00207	none
Solyc01g060290.1	0	1	0	0	1	0	-1	-1	1	0	0	0	0	0	0	-1	0	Unknown Protein (AHRD V1)	#N/A	#N/A	#N/A	#N/A	#N/A	#N/A
Solyc01g060300.1	1	1	-1	-1	0	0	1	0	1	0	-1	1	-1	0	1	0	0	MADS-box transcription factor (AHRD V1 *-*- Q9SEE0_PICAB)%3B contains Interpro domain(s) IPR002100 Transcription factor%2C MADS-box ;_Length	MADS BOX PROTEIN	none	none	none	none	none
Solyc01g060320.1	0	0	0	0	0	0	0	-1	1	0	0	0	0	0	0	0	0	Unknown Protein (AHRD V1)	#N/A	#N/A	#N/A	#N/A	#N/A	#N/A
Solyc01g060370.1	0	0	0	0	0	0	0	0	0	0	0	0	0	0	0	0	0	B3 domain-containing protein Os04g0386900 (AHRD V1 ***- Y4869_ORYSJ)%3B contains Interpro domain(s) IPR003340 Transcriptional factor B3 ;_Length	FAMILY NOT NAMED	none	none	none	none	none
Solyc01g060390.1	0	0	0	0	0	0	0	0	0	0	0	0	0	0	0	0	0	Unknown Protein (AHRD V1)	#N/A	#N/A	#N/A	#N/A	#N/A	#N/A
Solyc01g060410.2	0	0	0	0	0	0	0	0	0	0	-1	0	0	0	0	0	0	Unknown Protein (AHRD V1)	PHOSPHATIDYLINOSITOL N-ACETYLGLUCOSAMINYLTRANSFERASE SUBUNIT P DOWN SYNDROME CRITICAL REGION PROTEIN 5 -RELATED	none	none	none	glycosyltransferaseHHPC00111;transferaseHHPC00220	none
Solyc01g060460.1	1	0	0	-1	0	0	0	0	0	0	0	0	0	0	0	0	0	DNA repair protein (AHRD V1 **-- Q2ULH2_ASPOR)%3B contains Interpro domain(s) IPR014001 DEAD-like helicase%2C N-terminal ;_Length	SWI_SNF-RELATED MATRIX-ASSOCIATED ACTIN-DEPENDENT REGULATOR OF CHROMATIN SUBFAMILY-RELATED	none	none	none	DNA binding proteinHHPC00009;DNA helicaseHHPC00011;helicaseHHPC00115;nucleic acid bindingHHPC00171	none
Solyc01g060470.2	1	1	0	0	0	0	0	0	0	0	0	0	0	0	0	0	0	Importin alpha-1b subunit (AHRD V1 ***- B6T451_MAIZE)%3B contains Interpro domain(s) IPR011989 Armadillo-like helical	IMPORTIN ALPHA	transporter activityHHGO:0005215;bindingHHGO:0005488	localizationHHGO:0051179;protein targetingHHGO:0006605;intracellular protein transportHHGO:0006886;cellular processHHGO:0009987;nuclear transportHHGO:0051169;protein localizationHHGO:0008104;transportHHGO:0006810;protein transportHHGO:0015031	cytoplasmHHGO:0005737;cell partHHGO:0044464;nucleusHHGO:0005634;integral to membraneHHGO:0016021;protein complexHHGO:0043234;intracellularHHGO:0005622;nucleoplasmHHGO:0005654;macromolecular complexHHGO:0032991;nuclear envelopeHHGO:0005635;cytosolHHGO:0005829;membraneHHGO:0016020;organelleHHGO:0043226	transfer_carrier proteinHHPC00219	none
Solyc01g060490.2	1	1	0	0	0	1	0	0	1	0	-1	0	-1	0	0	0	-1	GATA transcription factor 22 (AHRD V1 *-*- B6U513_MAIZE)%3B contains Interpro domain(s) IPR000679 Zinc finger%2C GATA-type	TRANSCRIPTION FACTOR GATA GATA BINDING FACTOR	nucleic acid bindingHHGO:0003676;nucleic acid binding transcription factor activityHHGO:0001071;bindingHHGO:0005488;chromatin bindingHHGO:0003682;sequence-specific DNA binding RNA polymerase II transcription factor activityHHGO:0000981;DNA bindingHHGO:0003677;protein bindingHHGO:0005515;sequence-specific DNA binding transcription factor activityHHGO:0003700	regulation of biological processHHGO:0050789;cell differentiationHHGO:0030154;transcription, DNA-dependentHHGO:0006351;regulation of transcription from RNA polymerase II promoterHHGO:0006357;RNA metabolic processHHGO:0016070;nitrogen compound metabolic processHHGO:0006807;regulation of nucleobase-containing compound metabolic processHHGO:0019219;developmental processHHGO:0032502;biological regula…	cell partHHGO:0044464;organelleHHGO:0043226;nucleusHHGO:0005634;protein complexHHGO:0043234;intracellularHHGO:0005622;nucleoplasmHHGO:0005654;macromolecular complexHHGO:0032991	none	none
Solyc01g065490.2	0	0	0	0	0	0	0	0	0	0	0	0	0	0	0	0	0	Aldo/keto reductase (AHRD V1 **-- A2Q5A8_MEDTR)%3B contains Interpro domain(s) IPR001395 Aldo/keto reductase	FAMILY NOT NAMED	oxidoreductase activityHHGO:0016491;transporter activityHHGO:0005215;catalytic activityHHGO:0003824	metabolic processHHGO:0008152	none	reductaseHHPC00198;oxidoreductaseHHPC00176	none
Solyc01g065510.2	0	0	0	0	0	0	0	0	0	0	0	0	0	0	0	0	0	Unknown Protein (AHRD V1)	#N/A	#N/A	#N/A	#N/A	#N/A	#N/A
Solyc01g065530.2	0	0	0	0	0	0	0	0	0	0	0	0	0	0	0	0	0	COBRA-like protein (AHRD V1 ***- Q655F2_ORYSJ)%3B contains Interpro domain(s) IPR006918 Glycosyl-phosphatidyl inositol-anchored%2C plant	FAMILY NOT NAMED	none	none	none	none	none
Solyc01g065540.2	0	0	0	0	0	0	1	0	0	0	0	0	0	0	0	0	0	Response regulator 8 (AHRD V1 *-*- Q9AV93_MAIZE)%3B contains Interpro domain(s) IPR017053 Response regulator%2C plant B-type	FAMILY NOT NAMED	methyltransferase activityHHGO:0008168;transferase activityHHGO:0016740;catalytic activityHHGO:0003824;kinase activityHHGO:0016301;protein kinase activityHHGO:0004672	signal transductionHHGO:0007165;cellular amino acid metabolic processHHGO:0006520;cell communicationHHGO:0007154;protein phosphorylationHHGO:0006468;protein metabolic processHHGO:0019538;cellular processHHGO:0009987;primary metabolic processHHGO:0044238;metabolic processHHGO:0008152;cellular protein modification processHHGO:0006464	intracellularHHGO:0005622;plasma membraneHHGO:0005886	transcription factorHHPC00218;protein kinaseHHPC00193;transferaseHHPC00220;methyltransferaseHHPC00155;kinaseHHPC00137	none
Solyc01g065550.2	-1	0	0	0	0	0	0	0	0	0	0	0	0	0	0	0	0	Protein DEHYDRATION-INDUCED 19 homolog 4 (AHRD V1 ***- DI194_ARATH)%3B contains Interpro domain(s) IPR008598 Drought induced 19	FAMILY NOT NAMED	none	none	none	none	none
Solyc01g065560.2	0	0	0	0	0	0	0	0	0	0	0	0	0	0	0	0	0	Os08g0100600 protein (Fragment) (AHRD V1 *-*- Q0J8P7_ORYSJ)%3B contains Interpro domain(s) IPR008507 Protein of unknown function DUF789	FAMILY NOT NAMED	none	none	none	none	none
Solyc01g065580.2	1	1	0	0	0	0	0	0	0	0	0	0	0	0	0	0	0	Pumilio domain-containing protein KIAA0020 (AHRD V1 ***- B5X3V8_SALSA)%3B contains Interpro domain(s) IPR011989 Armadillo-like helical	UNCHARACTERIZED	nucleic acid bindingHHGO:0003676;mRNA bindingHHGO:0003729;RNA bindingHHGO:0003723;bindingHHGO:0005488	regulation of biological processHHGO:0050789;biological regulationHHGO:0065007;regulation of translationHHGO:0006417;biosynthetic processHHGO:0009058;protein metabolic processHHGO:0019538;cellular processHHGO:0009987;primary metabolic processHHGO:0044238;metabolic processHHGO:0008152;translationHHGO:0006412	cell partHHGO:0044464;nucleolusHHGO:0005730;organelleHHGO:0043226;nucleusHHGO:0005634;intracellularHHGO:0005622	none	none
Solyc01g065690.2	0	0	0	0	0	-1	0	0	0	0	0	0	0	0	0	0	0	Heavy-metal associated domain protein (AHRD V1 *--- C3SA91_BRADI)%3B contains Interpro domain(s) IPR006121 Heavy metal transport/detoxification protein	COPPER TRANSPORT PROTEIN ATOX1-RELATED	bindingHHGO:0005488	biological regulationHHGO:0065007;localizationHHGO:0051179;homeostatic processHHGO:0042592;cation transportHHGO:0006812;cellular processHHGO:0009987;ion transportHHGO:0006811;transportHHGO:0006810	cytoplasmHHGO:0005737;cell partHHGO:0044464;intracellularHHGO:0005622	transfer_carrier proteinHHPC00219;chaperoneHHPC00072	none
Solyc01g065700.2	1	1	0	0	0	0	0	0	0	0	0	0	0	0	0	0	0	Integrin-linked kinase-associated serine/threonine phosphatase 2C (AHRD V1 **** ILKAP_BOVIN)%3B contains Interpro domain(s) IPR015655 Protein phosphatase 2C	PROTEIN PHOSPHATASE 2C	kinase inhibitor activityHHGO:0019210;hydrolase activity, acting on ester bondsHHGO:0016788;phosphatase activityHHGO:0016791;bindingHHGO:0005488;catalytic activityHHGO:0003824;hydrolase activityHHGO:0016787;protein bindingHHGO:0005515;enzyme inhibitor activityHHGO:0004857;kinase regulator activityHHGO:0019207;phosphoprotein phosphatase activityHHGO:0004721;enzyme regulator activityHHGO:0030234	protein phosphorylationHHGO:0006468;intracellular signal transductionHHGO:0035556;cellular processHHGO:0009987;protein metabolic processHHGO:0019538;cellular protein modification processHHGO:0006464;metabolic processHHGO:0008152;primary metabolic processHHGO:0044238	none	kinase modulatorHHPC00140;kinase inhibitorHHPC00139;protein phosphataseHHPC00195;enzyme modulatorHHPC00095;phosphataseHHPC00181;hydrolaseHHPC00121	none
Solyc01g065710.2	0	0	0	0	0	0	0	0	0	0	0	0	0	0	0	0	0	Unknown Protein (AHRD V1)	FAMILY NOT NAMED	none	none	none	none	none
Solyc01g065720.2	-1	-1	0	0	0	0	0	0	0	0	0	0	0	0	0	0	0	Phospholipase D (AHRD V1 **** A3KH17_ARATH)%3B contains Interpro domain(s) IPR016555 Phospholipase D%2C eukaryota	PHOSPHOLIPASE D	none	none	none	none	Ras PathwayHHP04393 PLDHHP04574;AngiogenesisHHP00005 PLDHHP00204
Solyc01g065740.2	0	0	0	0	0	0	0	0	0	0	0	0	0	0	0	0	0	F-box family protein (AHRD V1 ***- B9GFH4_POPTR)%3B contains Interpro domain(s) IPR001810 Cyclin-like F-box	FAMILY NOT NAMED	none	none	none	none	none
Solyc01g065780.1	1	0	0	0	0	0	0	0	0	0	0	0	0	0	0	0	0	NADH-quinone oxidoreductase subunit D (AHRD V1 --*- NUOD_EHRCR)	#N/A	#N/A	#N/A	#N/A	#N/A	#N/A
Solyc01g065810.1	0	0	1	0	0	0	0	0	0	0	0	0	0	0	0	0	0	NADH-quinone oxidoreductase subunit D (AHRD V1 ***- C4YU74_9RICK)%3B contains Interpro domain(s) IPR001135 NADH-quinone oxidoreductase%2C subunit D ;_Length	NADH-UBIQUINONE OXIDOREDUCTASE 49 KDA SUBUNIT	oxidoreductase activityHHGO:0016491;catalytic activityHHGO:0003824	respiratory electron transport chainHHGO:0022904;oxidative phosphorylationHHGO:0006119;generation of precursor metabolites and energyHHGO:0006091	none	dehydrogenaseHHPC00092;reductaseHHPC00198;oxidoreductaseHHPC00176	none
Solyc01g065830.1	0	1	0	0	0	0	0	0	0	0	0	0	0	0	0	0	0	Unknown Protein (AHRD V1)	#N/A	#N/A	#N/A	#N/A	#N/A	#N/A
Solyc01g065840.2	1	1	0	0	0	0	0	0	0	0	-1	0	0	0	0	0	0	F-box/LRR-repeat protein At3g03360 (AHRD V1 *-*- FBL42_ARATH)%3B contains Interpro domain(s) IPR001810 Cyclin-like F-box	FAMILY NOT NAMED	none	none	none	none	none
Solyc01g065900.1	1	1	0	-1	0	0	0	0	0	0	0	0	0	0	0	0	0	Gt-2-related-like (AHRD V1 *-*- Q67UM4_ORYSJ)	FAMILY NOT NAMED	none	none	none	none	none
Solyc01g065920.1	0	0	0	0	0	0	0	0	0	0	0	0	0	0	0	0	0	Unknown Protein (AHRD V1)	FAMILY NOT NAMED	none	none	none	none	none
Solyc01g065930.1	1	1	0	0	0	0	0	0	0	0	-1	0	-1	0	0	0	0	Unknown Protein (AHRD V1)	#N/A	#N/A	#N/A	#N/A	#N/A	#N/A
Solyc01g065940.1	1	1	0	0	0	0	0	0	0	0	-1	0	-1	0	0	0	0	Unknown Protein (AHRD V1)	#N/A	#N/A	#N/A	#N/A	#N/A	#N/A
Solyc01g065950.1	1	1	0	0	0	0	0	0	0	0	-1	0	-1	0	0	0	0	Unknown Protein (AHRD V1)	#N/A	#N/A	#N/A	#N/A	#N/A	#N/A
Solyc01g065980.2	-1	-1	-1	1	1	0	-1	0	0	-1	0	0	0	0	0	-1	0	Ethylene responsive transcription factor 2b (AHRD V1 *-** C0J9I6_9ROSA)%3B contains Interpro domain(s) IPR001471 Pathogenesis-related transcriptional factor and ERF%2C DNA-binding	FAMILY NOT NAMED	none	none	none	none	none
Solyc01g066020.1	1	1	1	0	0	0	-1	0	0	0	0	0	0	0	0	0	0	Tir-nbs-lrr%2C resistance protein	LEUCINE-RICH REPEAT-CONTAINING PROTEIN	none	none	none	none	none
Solyc01g066030.1	0	1	0	0	0	0	0	0	0	0	0	0	0	0	0	0	0	Mutator-like transposase (AHRD V1 *--- Q94HK4_ORYSA)%3B contains Interpro domain(s) IPR006564 Zinc finger%2C PMZ-type ;_Length	FAMILY NOT NAMED	none	mitosisHHGO:0007067	none	none	none
Solyc01g066050.2	0	0	0	0	0	0	0	0	0	0	0	0	0	0	0	0	0	Peptidyl-prolyl cis-trans isomerase FKBP5 (AHRD V1 *--- FKBP5_HUMAN)%3B contains Interpro domain(s) IPR011990 Tetratricopeptide-like helical	TPR REPEAT CONTAINING PROTEIN	none	response to stimulusHHGO:0050896;response to stressHHGO:0006950;protein metabolic processHHGO:0019538;protein foldingHHGO:0006457;primary metabolic processHHGO:0044238;metabolic processHHGO:0008152	none	chaperoneHHPC00072	none
Solyc01g066060.2	0	0	0	0	0	0	0	0	0	0	0	0	0	0	0	0	0	DAG protein (AHRD V1 ***- B6UD77_MAIZE)	FAMILY NOT NAMED	none	none	none	none	none
Solyc01g066080.1	1	1	0	0	0	0	0	0	0	1	0	0	0	0	0	0	0	O-glucosyltransferase 3 (AHRD V1 ***- A5HJ40_9ROSI)%3B contains Interpro domain(s) IPR002213 UDP-glucuronosyl/UDP-glucosyltransferase ;_Length	GLUCOSYL_GLUCURONOSYL TRANSFERASES	transferase activityHHGO:0016740;transferase activity, transferring glycosyl groupsHHGO:0016757;catalytic activityHHGO:0003824	metabolic processHHGO:0008152	cell partHHGO:0044464;organelleHHGO:0043226;intracellularHHGO:0005622	none	none
Solyc01g066100.1	1	1	-1	0	0	0	0	0	0	1	-1	1	-1	0	1	1	0	UDP-glucosyltransferase family 1 protein (AHRD V1 **** C6KI44_CITSI)%3B contains Interpro domain(s) IPR002213 UDP-glucuronosyl/UDP-glucosyltransferase	GLUCOSYL_GLUCURONOSYL TRANSFERASES	transferase activityHHGO:0016740;transferase activity, transferring glycosyl groupsHHGO:0016757;catalytic activityHHGO:0003824	metabolic processHHGO:0008152	cell partHHGO:0044464;organelleHHGO:0043226;intracellularHHGO:0005622	none	none
Solyc01g066110.1	1	1	0	0	0	0	0	0	0	1	-1	1	0	0	0	1	0	Glucosyltransferase (AHRD V1 **** Q8RU71_TOBAC)%3B contains Interpro domain(s) IPR002213 UDP-glucuronosyl/UDP-glucosyltransferase	GLUCOSYL_GLUCURONOSYL TRANSFERASES	transferase activityHHGO:0016740;transferase activity, transferring glycosyl groupsHHGO:0016757;catalytic activityHHGO:0003824	metabolic processHHGO:0008152	cell partHHGO:0044464;organelleHHGO:0043226;intracellularHHGO:0005622	none	none
Solyc01g066120.1	0	0	0	0	0	0	0	0	0	0	0	0	-1	0	0	0	0	Glucosyltransferase (AHRD V1 ***- Q8RU71_TOBAC)%3B contains Interpro domain(s) IPR002213 UDP-glucuronosyl/UDP-glucosyltransferase ;_Length	GLUCOSYL_GLUCURONOSYL TRANSFERASES	transferase activityHHGO:0016740;transferase activity, transferring glycosyl groupsHHGO:0016757;catalytic activityHHGO:0003824	metabolic processHHGO:0008152	cell partHHGO:0044464;organelleHHGO:0043226;intracellularHHGO:0005622	none	none
Solyc01g066130.1	1	1	0	0	0	0	0	0	0	1	0	0	0	0	0	0	0	Unknown Protein (AHRD V1)	#N/A	#N/A	#N/A	#N/A	#N/A	#N/A
Solyc01g066140.1	1	1	0	0	0	0	0	0	0	1	-1	0	0	0	0	1	0	UDP-glucosyltransferase family 1 protein (AHRD V1 **** C6KI44_CITSI)%3B contains Interpro domain(s) IPR002213 UDP-glucuronosyl/UDP-glucosyltransferase	GLUCOSYL_GLUCURONOSYL TRANSFERASES	transferase activityHHGO:0016740;transferase activity, transferring glycosyl groupsHHGO:0016757;catalytic activityHHGO:0003824	metabolic processHHGO:0008152	cell partHHGO:0044464;organelleHHGO:0043226;intracellularHHGO:0005622	none	none
Solyc01g066150.1	1	1	0	0	0	0	0	0	0	0	0	0	0	0	0	0	0	Glucosyltransferase (AHRD V1 ***- Q8RU71_TOBAC)	GLUCOSYL_GLUCURONOSYL TRANSFERASES	transferase activityHHGO:0016740;transferase activity, transferring glycosyl groupsHHGO:0016757;catalytic activityHHGO:0003824	metabolic processHHGO:0008152	cell partHHGO:0044464;organelleHHGO:0043226;intracellularHHGO:0005622	none	none
Solyc01g066210.1	1	1	1	0	0	0	0	0	0	0	-1	0	-1	0	0	0	0	Unknown Protein (AHRD V1)	#N/A	#N/A	#N/A	#N/A	#N/A	#N/A
Solyc01g066220.1	1	1	1	0	0	0	0	0	0	0	-1	0	0	0	0	0	0	Unknown Protein (AHRD V1)	#N/A	#N/A	#N/A	#N/A	#N/A	#N/A
Solyc01g066230.1	1	1	0	0	0	0	0	0	0	0	-1	0	-1	0	0	0	-1	Unknown Protein (AHRD V1)	#N/A	#N/A	#N/A	#N/A	#N/A	#N/A
Solyc01g066240.1	0	1	0	0	0	0	0	0	0	0	0	0	-1	0	0	0	0	Unknown Protein (AHRD V1)	#N/A	#N/A	#N/A	#N/A	#N/A	#N/A
Solyc01g066250.1	1	1	0	0	0	0	-1	0	-1	0	-1	0	-1	0	0	0	0	Unknown Protein (AHRD V1)	#N/A	#N/A	#N/A	#N/A	#N/A	#N/A
Solyc01g066310.2	0	-1	0	0	0	0	0	1	-1	0	0	0	0	0	0	1	0	Acyl-CoA dehydrogenase (AHRD V1 *-** A6F634_9ALTE)%3B contains Interpro domain(s) IPR009100 Acyl-CoA dehydrogenase/oxidase%2C middle and N-terminal	ELECTRON TRANSPORT OXIDOREDUCTASE	nucleotide bindingHHGO:0000166;bindingHHGO:0005488;catalytic activityHHGO:0003824;oxidoreductase activityHHGO:0016491	lipid metabolic processHHGO:0006629;fatty acid metabolic processHHGO:0006631;fatty acid beta-oxidationHHGO:0006635;biological regulationHHGO:0065007;homeostatic processHHGO:0042592;catabolic processHHGO:0009056;cellular processHHGO:0009987;primary metabolic processHHGO:0044238;metabolic processHHGO:0008152	none	oxidaseHHPC00175;dehydrogenaseHHPC00092;transferaseHHPC00220;oxidoreductaseHHPC00176	none
Solyc01g066320.1	1	1	1	-1	0	0	0	1	-1	0	-1	0	0	0	0	0	-1	Unknown Protein (AHRD V1)	#N/A	#N/A	#N/A	#N/A	#N/A	#N/A
Solyc01g066330.1	1	1	1	-1	0	0	0	0	0	0	-1	0	0	0	0	0	-1	Unknown Protein (AHRD V1)	#N/A	#N/A	#N/A	#N/A	#N/A	#N/A
Solyc01g066350.1	1	1	1	-1	0	0	0	0	0	0	0	0	0	0	0	0	0	Unknown Protein (AHRD V1)	#N/A	#N/A	#N/A	#N/A	#N/A	#N/A
Solyc01g066390.2	0	0	0	0	0	0	0	0	0	0	0	0	0	0	0	0	0	Unknown Protein (AHRD V1)	#N/A	#N/A	#N/A	#N/A	#N/A	#N/A
Solyc01g066430.2	-1	-1	0	0	0	0	0	0	0	0	0	0	0	0	0	0	0	Ring H2 finger protein (AHRD V1 *-*- D9ZHD8_HYPPE)%3B contains Interpro domain(s) IPR018957 Zinc finger%2C C3HC4 RING-type	RING FINGER DOMAIN-CONTAINING	none	catabolic processHHGO:0009056;cellular processHHGO:0009987;protein metabolic processHHGO:0019538;primary metabolic processHHGO:0044238;metabolic processHHGO:0008152;proteolysisHHGO:0006508;cellular protein modification processHHGO:0006464	none	ubiquitin-protein ligaseHHPC00234	none
Solyc01g066440.2	-1	-1	0	0	0	0	0	0	0	0	0	0	0	0	0	0	0	Unknown Protein (AHRD V1)	FAMILY NOT NAMED	none	none	none	none	none
Solyc01g066460.2	-1	1	0	-1	0	0	0	0	0	0	0	0	0	0	0	-1	0	Epoxide hydrolase (AHRD V1 **** Q41413_SOLTU)%3B contains Interpro domain(s) IPR000639 Epoxide hydrolase-like	FAMILY NOT NAMED	hydrolase activityHHGO:0016787;catalytic activityHHGO:0003824	metabolic processHHGO:0008152	none	serine proteaseHHPC00203;proteaseHHPC00190;hydrolaseHHPC00121	none
Solyc01g066470.2	0	1	0	-1	0	0	0	0	0	0	0	0	0	0	0	0	0	Epoxide hydrolase (AHRD V1 **** Q41413_SOLTU)%3B contains Interpro domain(s) IPR000639 Epoxide hydrolase-like	FAMILY NOT NAMED	hydrolase activityHHGO:0016787;catalytic activityHHGO:0003824	metabolic processHHGO:0008152	none	serine proteaseHHPC00203;proteaseHHPC00190;hydrolaseHHPC00121	none
Solyc01g066480.2	0	0	0	-1	0	0	0	0	0	0	0	0	0	0	0	0	0	Fumarylacetoacetate hydrolase domain-containing protein 1 (AHRD V1 **-- B6TV71_MAIZE)%3B contains Interpro domain(s) IPR002529 Fumarylacetoacetase%2C C-terminal-like	FUMARYLACETOACETATE HYDROLASE	hydrolase activityHHGO:0016787;isomerase activityHHGO:0016853;catalytic activityHHGO:0003824	cellular amino acid catabolic processHHGO:0009063;cellular amino acid metabolic processHHGO:0006520;primary metabolic processHHGO:0044238;metabolic processHHGO:0008152	none	isomeraseHHPC00135;hydrolaseHHPC00121	none
Solyc01g066500.1	0	0	0	0	0	0	0	0	0	0	0	0	0	0	0	0	0	MADS-box transcription factor 22 (AHRD V1 *-*- B6TGW7_MAIZE)%3B contains Interpro domain(s) IPR002100 Transcription factor%2C MADS-box ;_Length	MADS BOX PROTEIN	none	none	none	none	none
Solyc01g066510.1	1	1	1	0	0	0	0	0	0	0	-1	0	-1	1	0	0	0	Genomic DNA chromosome 5 TAC clone K21P3 (AHRD V1 **-- Q9FJ23_ARATH)%3B contains Interpro domain(s) IPR001298 Filamin/ABP280 repeat	FAMILY NOT NAMED	none	none	none	none	none
Solyc01g066520.2	0	0	0	0	0	0	0	0	0	0	0	0	0	0	0	0	0	Dihydrolipoyllysine-residue acetyltransferase component of pyruvate dehydrogenase complex (AHRD V1 ***- C3BP76_9BACI)%3B contains Interpro domain(s) IPR015761 Lipoamide Acyltransferase	FAMILY NOT NAMED	transferase activity, transferring acyl groupsHHGO:0016746;transferase activityHHGO:0016740;acetyltransferase activityHHGO:0016407;catalytic activityHHGO:0003824	coenzyme metabolic processHHGO:0006732;carbohydrate metabolic processHHGO:0005975;primary metabolic processHHGO:0044238;metabolic processHHGO:0008152	none	acyltransferaseHHPC00042;transferaseHHPC00220;acetyltransferaseHHPC00038	none
Solyc01g066570.2	0	0	1	0	0	0	-1	0	-1	0	0	0	0	0	0	0	0	Genomic DNA chromosome 5 TAC clone K14A3 (AHRD V1 *--- Q9FGQ9_ARATH)%3B contains Interpro domain(s) IPR007650 Protein of unknown function DUF581	FAMILY NOT NAMED	none	none	none	none	none
Solyc01g066590.2	0	0	0	0	0	0	0	0	0	0	0	0	0	0	0	0	0	Dynein light chain 2 cytoplasmic (AHRD V1 ***- B5XH01_SALSA)%3B contains Interpro domain(s) IPR001372 Dynein light chain%2C type 1 and 2	DYNEIN LIGHT CHAIN	protein bindingHHGO:0005515;enzyme inhibitor activityHHGO:0004857;structural molecule activityHHGO:0005198;structural constituent of cytoskeletonHHGO:0005200;bindingHHGO:0005488;enzyme regulator activityHHGO:0030234	localizationHHGO:0051179;nitrogen compound metabolic processHHGO:0006807;transportHHGO:0006810;protein transportHHGO:0015031;nitric oxide biosynthetic processHHGO:0006809;cell cycleHHGO:0007049;intracellular protein transportHHGO:0006886;vesicle-mediated transportHHGO:0016192;cellular component organizationHHGO:0016043;cellular processHHGO:0009987;nucleobase-containing compound metabolic processH…	cytoskeletonHHGO:0005856;intracellularHHGO:0005622;microtubuleHHGO:0005874	microtubule family cytoskeletal proteinHHPC00157;cytoskeletal proteinHHPC00085;enzyme modulatorHHPC00095	Huntington diseaseHHP00029 Dynein complexHHP00774
Solyc01g066610.2	1	1	0	0	0	0	0	0	0	0	-1	0	-1	0	0	0	0	Fanconi anemia group I protein (AHRD V1 *--- FANCI_HUMAN)	BC025462 PROTEIN	protein bindingHHGO:0005515;bindingHHGO:0005488	biological regulationHHGO:0065007;regulation of biological processHHGO:0050789;cell cycleHHGO:0007049;regulation of cell cycleHHGO:0051726;response to stimulusHHGO:0050896;response to stressHHGO:0006950;cellular processHHGO:0009987	none	none	none
Solyc01g066620.2	-1	0	0	0	0	0	0	-1	1	0	0	0	0	0	0	0	0	Fatty acid oxidation complex subunit alpha (AHRD V1 ***- D2ZF34_9ENTR)%3B contains Interpro domain(s) IPR006176 3-hydroxyacyl-CoA dehydrogenase%2C NAD binding	3-HYDROXYACYL-COA DEHYROGENASE	lyase activityHHGO:0016829;isomerase activityHHGO:0016853;racemase and epimerase activityHHGO:0016854;catalytic activityHHGO:0003824;oxidoreductase activityHHGO:0016491;hydro-lyase activityHHGO:0016836	lipid metabolic processHHGO:0006629;fatty acid metabolic processHHGO:0006631;fatty acid beta-oxidationHHGO:0006635;tRNA aminoacylation for protein translationHHGO:0006418;protein metabolic processHHGO:0019538;carbohydrate metabolic processHHGO:0005975;primary metabolic processHHGO:0044238;metabolic processHHGO:0008152;translationHHGO:0006412	none	dehydrogenaseHHPC00092;epimerase_racemaseHHPC00096;isomeraseHHPC00135;oxidoreductaseHHPC00176;lyaseHHPC00144;hydrataseHHPC00120	none
Solyc01g066640.2	-1	-1	0	0	0	0	0	0	0	0	0	0	0	0	0	0	0	Os04g0405500 protein (Fragment) (AHRD V1 *-*- Q0JDG3_ORYSJ)	FAMILY NOT NAMED	none	none	none	none	none
Solyc01g066690.2	1	0	0	0	0	0	-1	0	-1	0	0	0	0	0	0	1	0	Translation initiation factor 2 gamma subunit (AHRD V1 **** Q684L1_9INSE)%3B contains Interpro domain(s) IPR015256 Initiation factor eIF2 gamma%2C C-terminal	FAMILY NOT NAMED	GTPase activityHHGO:0003924;pyrophosphatase activityHHGO:0016462;hydrolase activityHHGO:0016787;catalytic activityHHGO:0003824	nitrogen compound metabolic processHHGO:0006807;catabolic processHHGO:0009056;biosynthetic processHHGO:0009058;cellular processHHGO:0009987;protein metabolic processHHGO:0019538;nucleobase-containing compound metabolic processHHGO:0006139;primary metabolic processHHGO:0044238;phosphate-containing compound metabolic processHHGO:0006796;metabolic processHHGO:0008152;translationHHGO:0006412	cell partHHGO:0044464;intracellularHHGO:0005622	G-proteinHHPC00020;translation initiation factorHHPC00224;translation factorHHPC00223;translation elongation factorHHPC00222;RNA binding proteinHHPC00031;enzyme modulatorHHPC00095;nucleic acid bindingHHPC00171;hydrolaseHHPC00121	none
Solyc01g066700.2	1	0	1	0	-1	0	-1	-1	0	0	0	0	0	0	0	1	0	Bifunctional polymyxin resistance protein ArnA (AHRD V1 **-- ARNA_SALPC)%3B contains Interpro domain(s) IPR016040 NAD(P)-binding domain	NAD DEPENDENT EPIMERASE_DEHYDRATASE	lyase activityHHGO:0016829;isomerase activityHHGO:0016853;racemase and epimerase activityHHGO:0016854;catalytic activityHHGO:0003824;oxidoreductase activityHHGO:0016491;hydro-lyase activityHHGO:0016836	lipid metabolic processHHGO:0006629;polysaccharide metabolic processHHGO:0005976;steroid metabolic processHHGO:0008202;glycogen metabolic processHHGO:0005977;cholesterol metabolic processHHGO:0008203;carbohydrate metabolic processHHGO:0005975;primary metabolic processHHGO:0044238;metabolic processHHGO:0008152	none	dehydrataseHHPC00091;epimerase_racemaseHHPC00096;isomeraseHHPC00135;oxidoreductaseHHPC00176;lyaseHHPC00144	none
Solyc01g066710.2	1	0	1	0	-1	0	-1	-1	0	0	0	0	0	0	0	1	0	Unknown Protein (AHRD V1)	#N/A	#N/A	#N/A	#N/A	#N/A	#N/A
Solyc01g066720.2	-1	0	0	0	0	0	0	0	0	0	0	0	0	0	0	0	0	Hypoxia induced protein conserved region containing protein (AHRD V1 ***- B6UCX6_MAIZE)%3B contains Interpro domain(s) IPR007667 Hypoxia induced protein conserved region	FAMILY NOT NAMED	none	cellular component biogenesisHHGO:0044085;protein complex biogenesisHHGO:0070271;mitochondrion organizationHHGO:0007005;cellular component organizationHHGO:0016043;cellular processHHGO:0009987;organelle organizationHHGO:0006996;protein complex assemblyHHGO:0006461	cytoplasmHHGO:0005737;cell partHHGO:0044464;mitochondrial inner membraneHHGO:0005743;integral to membraneHHGO:0016021;protein complexHHGO:0043234;intracellularHHGO:0005622;macromolecular complexHHGO:0032991;mitochondrionHHGO:0005739;membraneHHGO:0016020;organelleHHGO:0043226	none	none
Solyc01g066730.2	0	0	0	0	0	0	0	0	0	0	0	0	0	0	0	0	0	MADS-box protein (AHRD V1 *-*- D7KFE1_ARALY)%3B contains Interpro domain(s) IPR002100 Transcription factor%2C MADS-box	MADS BOX PROTEIN	none	none	none	none	none
Solyc01g066740.2	-1	-1	0	0	0	0	0	0	0	0	0	0	0	0	0	0	0	Transducin family protein (Fragment) (AHRD V1 *--- D7L607_ARALY)%3B contains Interpro domain(s) IPR017986 WD40 repeat%2C region	F-BOX AND WD40 DOMAIN PROTEIN	none	none	none	none	none
Solyc01g066770.2	0	0	0	0	0	0	0	0	0	0	0	0	0	0	0	0	0	Chaperone protein dnaJ 49 (AHRD V1 ***- B6TUY9_MAIZE)%3B contains Interpro domain(s) IPR003095 Heat shock protein DnaJ	DNAJ HOMOLOG SUBFAMILY C MEMBER	none	none	none	none	none
Solyc01g066820.2	-1	0	0	0	0	0	1	0	1	0	0	0	0	0	0	0	0	Kinesin like protein (AHRD V1 ***- Q940B8_ARATH)%3B contains Interpro domain(s) IPR001752 Kinesin%2C motor region	FAMILY NOT NAMED	pyrophosphatase activityHHGO:0016462;hydrolase activityHHGO:0016787;microtubule motor activityHHGO:0003777;motor activityHHGO:0003774;catalytic activityHHGO:0003824	catabolic processHHGO:0009056;cellular processHHGO:0009987;cellular component movementHHGO:0006928;nucleobase-containing compound metabolic processHHGO:0006139;nitrogen compound metabolic processHHGO:0006807;metabolic processHHGO:0008152;phosphate-containing compound metabolic processHHGO:0006796;primary metabolic processHHGO:0044238	cell partHHGO:0044464;cytoskeletonHHGO:0005856;organelleHHGO:0043226;protein complexHHGO:0043234;intracellularHHGO:0005622;macromolecular complexHHGO:0032991	microtubule family cytoskeletal proteinHHPC00157;cytoskeletal proteinHHPC00085;microtubule binding motor proteinHHPC00156	none
[truncated: 20,936 more rows]

## Sheet: Table S4
Table S4. GO term enrichment for differentially expressed genes using TopGO. The reference is a set of 22,006 genes expressed in the endosperm. MF, molecular function; BP, biological process; CC, cellular component
[truncated: 906 more rows]

## Sheet: Table S5
Table S5. Differential gene expression results in 15 contrasts (cross comparisons) for 58 candidate imprinted genes in wild tomatoes (Roth et al. 2018b). The direction is given as 'term1-term2'. A "-1" value means that the gene is downregulated in term1 (yellow cells); "1" values mean that the gene is upregulated in term1 (green cells); FDR = 0.05. PEG, Paternally expressed gene; MEG, Maternally …																		PANTHER Database
[truncated: 59 more rows]
